# Supplementary material
Source: publisher site journal article supplement (doi:10.18632/aging.206377)
Supplement: Supplementary file 1 [file pdf.pdf]

# The mediating role of DNA methylation clocks in associations of race, ethnicity, education, income, and occupation with mortality: findings from NHANES 1999-2002

Hanyang Shen<sup>1</sup>, Nicole Gladish<sup>1</sup>, Tiffany Fan<sup>2</sup>, Andres Cardenas<sup>1,3</sup>, Belinda L. Needham<sup>4</sup>, David H. Rehkopf<sup>1, 3, 5, 6, 7</sup>

<sup>1</sup>Department of Epidemiology and Population Health, Stanford University, Palo Alto, CA 94305, USA

<sup>2</sup>Institute for Computational and Mathematical Engineering, Stanford University, Palo Alto, CA 94305, USA

<sup>3</sup>Department of Pediatrics, Stanford University, Palo Alto, CA 94305, USA

<sup>4</sup>Department of Epidemiology, University of Michigan, Ann Arbor, MI 48109, USA

<sup>5</sup>Department of Health Policy, Stanford University, Palo Alto, CA 94305, USA

<sup>6</sup>Department of Medicine (Primary Care and Population Health), Stanford University, Palo Alto, CA 94305, USA

<sup>7</sup>Department of Sociology, Stanford University, Palo Alto, CA 94305, USA

**Correspondence to:** Hanyang Shen; email: [hyshe@stanford.edu](mailto:hyshe@stanford.edu)

**Keywords:** race and ethnicity, social position, epigenetic aging, mediation analysis, mortality disparities

**Received:** October 24, 2025

**Accepted:** March 24, 2026

**Published:** May 8, 2026

**Copyright:** © 2026 Shen et al. This is an open access article distributed under the terms of the [Creative Commons Attribution License](https://creativecommons.org/licenses/by/4.0/) (CC BY 4.0), which permits unrestricted use, distribution, and reproduction in any medium, provided the original author and source are credited.

## ABSTRACT

Race, ethnicity, education, income, and occupation are important social factors affecting health and longevity. DNA methylation aging biomarkers may mediate the effects of these social factors on mortality, but so far, no studies have investigated the extent of this mediation systematically in a nationally represents samples of the U.S. population. This study aims to provide systematic evidence on the mediating proportion of DNA methylation clocks between these social factors and mortality using the US National Health and Nutrition Examination Survey (NHANES) 1999-2002 (N=2,402) linked with National Death Index mortality data through 2019. After adjusting for gender, age, age<sup>2</sup>, and nativity, multiple DNA methylation clocks significantly mediated the pathways between social factors and all-cause mortality. Among all the 13 DNA methylation biomarkers available in NHANES, GrimAge2 consistently exhibited the strongest positive mediation capturing the social disparities on mortality up to 52% (95%CI: 26%-128%), followed by the DunedinPoAm. These effects generally exceeded the mediation proportion of traditional clinical risk factors collected in our study (such as C-reactive protein). This study suggested that DNA methylation epigenetic biomarkers may have utility as clinical aging indicators of the biological embedding of social disadvantage.

## INTRODUCTION

For most documented contexts and time periods, there is a strong association between lower socioeconomic position and risk of higher mortality [1, 2]. The theory of social stratification posits that social stratification caused by a combination of factors, particularly race, ethnicity, and socioeconomic position, would influence

health outcomes through differential access to resources, power, and opportunities [3, 4]. These adverse effects even can undermine the beneficial effects from other social exposures such as social cohesion and social resistance [5]. These health disparities are reflected in key social stratification factors such as race and ethnicity, educational attainment, income, and occupation. Studies report notable

differences in life expectancy across these dimensions. For instance, according to recent estimates, White Americans who reach age 15 have a life expectancy of 63 years, compared to 59 years for Black Americans and 66 years for Hispanic Americans [6]. Likewise, individuals with an income at or above 400% of the poverty threshold have a life expectancy of 60 years at age 18, while those living below the poverty line have just 49 years [7]. Similar disparities are also observed across different education levels and occupational groups [7–9].

To address these health inequalities, researchers have explored biological pathways to explain these embodiments from outset disadvantages to inner systems. One proposed mechanism is the early onset of chronic diseases due to behavioral and lifestyle factors, such as poor diet, smoking, and sedentary lifestyles [9]. Another mechanism involves environmental exposures, including local environment, household exposures, and occupational hazards, which disproportionately affect lower socioeconomic groups [10]. For example, individuals exposed to air pollution experience higher rates of cardiovascular diseases and hospitalizations, with these exposures being more prevalent in lower socioeconomic neighborhoods [11]. A third pathway suggests that chronic psychosocial stress resulting from economic instability, discrimination, and social deprivation leads to systemic inflammation and dysregulated glucose metabolism, both of which contribute to a higher risk of mortality [12].

Identifying reliable biomarkers that capture these pathways is critical for strengthening causal evidence linking distal social exposures early in the life to pathobiological disease processes occurring many years later. However, most traditional biomarkers reflect only a single biological process, limiting their ability to provide a comprehensive picture of health inequalities. For example, inflammation biomarkers have shown only modest mediation effects in explaining the relationship between socioeconomic status and mortality [13]. Moreover, social determinants of health and health policy changes often impact multiple biological and behavioral pathways differently, making it difficult to evaluate the correct direction of overall health impact using a single biomarker. For instance, a study on Earned Income Tax Credit found that this policy affected various health outcomes in different ways—some beneficial and others potentially detrimental [14]. Developing biomarkers that integrate signals across multiple pathways could therefore offer more holistic insights. Such integrative biomarkers would be especially useful for assessing the short-term health effects of social policy changes, such as

education reforms, housing programs, tax deductions, and environmental regulations.

DNA methylation clocks offer a potential solution as they may function in some cases as comprehensive biomarkers that capture cumulative biological effects of social and environmental exposures. Epigenetic mechanisms regulate gene expression by modifying DNA without altering the genetic sequence. DNA methylation, in which methyl groups are covalently bound to cytosine bases, influences gene accessibility and expression and has been associated with disease risk and mortality [15, 16]. DNA methylation clocks, which estimate either chronological age or physiological aging based on DNA methylation patterns, have been shown to be significantly associated with race and ethnicity, educational attainment, income, and occupation [17–23]. In addition, some of these clocks also strongly correlate with mortality and morbidity outcomes by design. However, only a limited number of studies have examined whether DNA methylation clocks mediate the relationships between race, ethnicity, socioeconomic positions and mortality disparities [24–27]. Existing evidence suggests that epigenetic aging biomarkers, especially the DNA methylation biomarkers trained on physiological measures, can significantly mediate these associations across diverse cohorts, yet previous studies have not simultaneously compared multiple social exposures or multiple mediators representing different biological pathways within a unified analytical framework.

To address this gap, the present study leverages nationally representative data from National Health and Nutrition Examination Survey (NHANES) to evaluate the mediating role of thirteen DNA methylation clocks trained for different purposes. These clocks are compared with traditional clinical biomarkers to assess their relative contributions to disparities caused by social stratification factors in mortality. The findings provide novel insights into the biological embedding of social disadvantages and highlight the potential utility of epigenetic aging measures for advancing research on the health impacts of social determinants.

## RESULTS

### Descriptive characteristics and survival analysis

The unweighted sample statistics for this study sample are presented in Table 1. Among the 2,402 participants in the analysis, 947 deaths (39%) were observed up to Dec 31, 2019. Of these, 164 were attributed to cardiovascular-related causes, while 197 were due to cancer. The racial and ethnic composition of the sample included 39% White Americans, 22% Black Americans, 36% Hispanic, and 3.5% individuals identifying as

**Table 1. Descriptive statistics for socioeconomic positions, demographic covariates, and clinical measures, NHANES 1999-2002 (n=2,402).**

| Categorical Variable              | Overall participants<br>(N=2,402) |              | Deceased participants<br>(N=947) |              | Undeceased participants<br>(N=1,455) |              |
|-----------------------------------|-----------------------------------|--------------|----------------------------------|--------------|--------------------------------------|--------------|
|                                   | Count                             | (Percentage) | Count                            | (Percentage) | Count                                | (Percentage) |
| Race and ethnicity                |                                   |              |                                  |              |                                      |              |
| Non-Hispanic White                | 943                               | (39.3%)      | 399                              | (42.1%)      | 544                                  | (37.4%)      |
| Non-Hispanic Black                | 516                               | (21.5%)      | 225                              | (23.8%)      | 291                                  | (20.0%)      |
| Hispanic                          | 860                               | (35.8%)      | 300                              | (31.7%)      | 560                                  | (38.5%)      |
| Another race or ethnicity         | 83                                | (3.5%)       | 23                               | (2.4%)       | 60                                   | (4.1%)       |
| Educational attainment            |                                   |              |                                  |              |                                      |              |
| College degree or higher          | 370                               | (15.4%)      | 96                               | (10.1%)      | 274                                  | (18.8%)      |
| Some college or associates degree | 440                               | (18.3%)      | 137                              | (14.5%)      | 303                                  | (20.8%)      |
| High school/GED                   | 496                               | (20.7%)      | 201                              | (21.2%)      | 295                                  | (20.3%)      |
| Less than high school             | 1096                              | (45.6%)      | 513                              | (54.2%)      | 583                                  | (40.1%)      |
| Family income                     |                                   |              |                                  |              |                                      |              |
| PIR 5+                            | 399                               | (16.6%)      | 87                               | (9.2%)       | 312                                  | (21.4%)      |
| PIR 2-5                           | 923                               | (38.4%)      | 337                              | (35.6%)      | 586                                  | (40.3%)      |
| PIR 1-2                           | 707                               | (29.4%)      | 339                              | (35.8%)      | 368                                  | (25.3%)      |
| PIR<1                             | 373                               | (15.5%)      | 184                              | (19.4%)      | 189                                  | (13.0%)      |
| Longest held occupation           |                                   |              |                                  |              |                                      |              |
| White collar and professional     | 535                               | (22.3%)      | 178                              | (18.8%)      | 357                                  | (24.5%)      |
| White collar, semi-routine        | 411                               | (17.1%)      | 154                              | (16.3%)      | 257                                  | (17.7%)      |
| Blue collar, high skill           | 389                               | (16.2%)      | 173                              | (18.3%)      | 216                                  | (14.8%)      |
| Blue collar, semi-routine         | 1004                              | (41.8%)      | 404                              | (42.7%)      | 600                                  | (41.2%)      |
| Never worked                      | 63                                | (2.6%)       | 38                               | (4.0%)       | 25                                   | (1.7%)       |
| Gender                            |                                   |              |                                  |              |                                      |              |
| Women                             | 1172                              | (48.8%)      | 406                              | (42.9%)      | 766                                  | (52.6%)      |
| Men                               | 1230                              | (51.2%)      | 541                              | (57.1%)      | 689                                  | (47.4%)      |
| Nativity                          |                                   |              |                                  |              |                                      |              |
| US born                           | 1794                              | (74.7%)      | 773                              | (81.6%)      | 1021                                 | (70.2%)      |
| Foreign born                      | 608                               | (25.3%)      | 174                              | (18.4%)      | 434                                  | (29.8%)      |
| Physical activity                 |                                   |              |                                  |              |                                      |              |
| Active                            | 1171                              | (48.8%)      | 375                              | (39.6%)      | 796                                  | (54.7%)      |
| Sedentary                         | 1231                              | (51.2%)      | 572                              | (60.4%)      | 659                                  | (45.3%)      |
| Alcohol consumption               |                                   |              |                                  |              |                                      |              |
| Abstainer                         | 1033                              | (43.0%)      | 466                              | (49.2%)      | 567                                  | (39.0%)      |
| Alcohol drinker                   | 1369                              | (57.0%)      | 481                              | (50.8%)      | 888                                  | (61.0%)      |
|                                   | <b>Mean</b>                       | <b>(SE)</b>  | <b>Mean</b>                      | <b>(SE)</b>  | <b>Mean</b>                          | <b>(SE)</b>  |
| Age                               | 65.11                             | (9.31)       | 70.41                            | (8.77)       | 61.66                                | (7.93)       |
| Healthy eating index              | 53.48                             | (12.86)      | 52.82                            | (12.86)      | 53.91                                | (12.84)      |
| Smoking pack years                | 15.44                             | (24.53)      | 20.41                            | (28.75)      | 12.20                                | (20.72)      |
| Waist to thigh ratio              | 1.96                              | (0.21)       | 2.02                             | (0.20)       | 1.92                                 | (0.20)       |
| BMI                               | 28.82                             | (5.76)       | 28.38                            | (6.01)       | 29.11                                | (5.58)       |
| Total cholesterol (mmol/L)        | 5.45                              | (1.06)       | 5.40                             | (1.14)       | 5.48                                 | (1.00)       |
| HDL-cholesterol (mg/dL)           | 51.83                             | (16.08)      | 51.59                            | (16.96)      | 51.98                                | (15.48)      |
| LDL-cholesterol (mg/dL)           | 128.42                            | (31.60)      | 126.51                           | (32.62)      | 129.67                               | (30.87)      |
| Glucose                           | 107.22                            | (45.09)      | 114.47                           | (57.01)      | 102.51                               | (34.44)      |
| C-reactive protein                | 0.60                              | (1.24)       | 0.70                             | (1.28)       | 0.53                                 | (1.20)       |

another race or mixed race. In terms of socioeconomic characteristics, 46% of participants had not completed high school, 38% had household income between two and five times of the poverty thresholds, and 42% reported their occupation as semi-routine blue-collar. The sample was 49% female and 25% foreign-born. The age of the participants ranged from 50 to 84 years, with the mean age as 65 years (SD=9).

The correlations between all the mediators we examined are shown in Figure 1. Most clocks had strong correlations with chronological age ( $r > 0.7$ ), with somewhat more moderate correlations for Weidner and Vidal-Bralo ( $r = 0.5$  and  $r = 0.6$ , respectively), and Horvath predicted telomere showed moderate negative association with chronological age as the correlation coefficient was  $-0.6$ . Only DunedinPoAm and Yang epigenetic age showed weaker correlations with chronological age,  $r = 0.04$  and  $r = 0.2$ , respectively.

The estimated coefficients from the survival analysis models (without any mediators) are presented in Supplementary Table 1. Compared to White participants, Black and Hispanic participants exhibited significantly higher risks of all-cause mortality, with

hazard ratios (HR) of 1.51 (95%CI: 1.25-1.82) and 1.40 (95%CI: 1.12-1.75), respectively, after adjusting for gender, age, age<sup>2</sup>, and nativity. All categories of lower educational attainment and lower household income were associated significantly with higher risks on all-cause mortality compared to the most advantaged groups, with HRs ranging from 1.63 (95%CI: 1.24-2.14) to 3.00 (95%CI: 2.18-4.12) with the most disadvantaged groups showing the biggest ratios for mortality. Individuals in high-skilled blue-collar and semi-routine blue-collar occupations showed significantly higher all-cause mortality risk compared to white-collar and professionals (HR=1.64, 95%CI: 1.19-2.27 and HR=1.55, 95%CI: 1.13-2.12, respectively).

The survival analysis of DNA methylation measures and clinical mediators and mortality are presented in Supplementary Table 2. Among the chronological age clocks, most of the clocks showed significant associations with all-cause mortality, and GrimAge, GrimAge2, and DunedinPoAm showed the strongest effect sizes with 1.11 (95%CI: 1.09-1.13), 1.10 (95%CI: 1.09-1.12), and 43.7 (95%CI: 16.9-113), respectively. Weidner and SkinBlood epigenetic age showed less strong associations, and Yang epigenetic age and Horvath

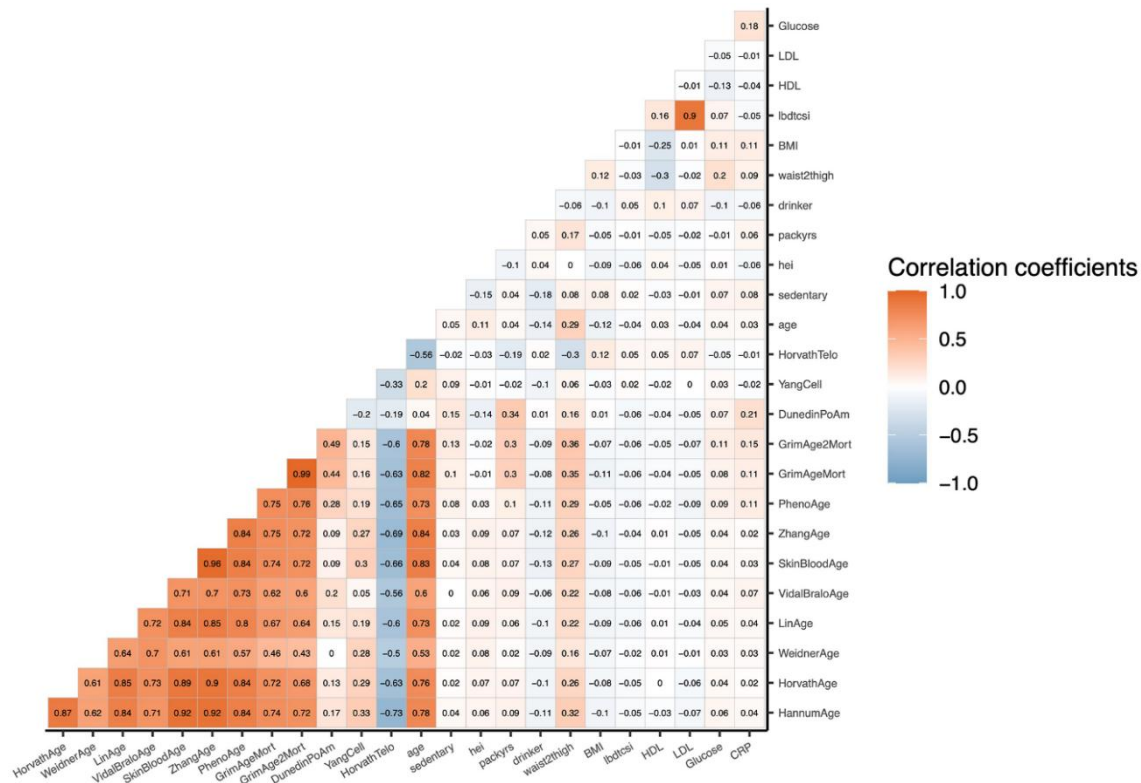

**Figure 1. Raw correlation matrix of potential mediators and age in NHANES 1999–2002 (n = 2,402).** Mediators include chronological age, physiological functioning clocks, pace-of-aging clock, clocks trained on other aging biomarkers, as well as behavioral, anthropometric, and clinical variables.

predicted telomere showed null effects. Only GrimAge, GrimAge2, and DunedinPoAm showed significant associations with both cardiovascular-specific and cancer-specific mortality due to smaller sample size. In addition, Hannum, Horvath, Vidal-Bralo, and PhenoAge epigenetic age showed significant associations with cancer-specific mortality with a HR range of 1.04 (95%CI: 1.01-1.07) to 1.05 (95%CI: 1.02-1.07).

### **The mediating roles of DNA methylation measures and clinical factors in the association between race and ethnicity and all-cause mortality**

The mediation analysis of DNA methylation clocks and clinical biomarkers for the association between race and ethnicity and all-cause mortality are shown in Figure 2 and Supplementary Table 3. Multiple mediation signals were observed when comparing Black and White participants, as well as for the comparison between Hispanic and White participants. Physiologically trained clocks GrimAge, GrimAge2, and DunedinPoAm showed moderate mediation. Among Black vs. White participants comparisons, GrimAge, GrimAge2, and DunedinPoAm mediated a proportion of 34% (95%CI: 19%-67%), 46% (95%CI: 27%-89%), and 24% (95%CI: 10%-49%), respectively. Unexpectedly, all chronological age clocks except Lin epigenetic age exhibited significant negative mediation ranging from -3% (95%CI: -8%- -0.3%) to -19% (95%CI: -38%- -10%), and Horvath predicted telomere exhibited -44% (95%CI: -79%- -27%) mediation. These results indicated that although compared to White participants, Black participants had overall higher risk of mortality, they also had on average higher Horvath predicted telomere values. These higher values of DNA methylation predicted telomere length are associated with reduced risks for mortality and protective for Black participants to show even greater mortality disparities. Comparing Hispanic to White participants, GrimAge2 and DunedinPoAm pace of aging exhibited significant positive mediation of 39% (95%CI: 18%-101%) and 28% (95%CI: 13%-70%), respectively. Most chronological age clocks did not exhibit significant mediation effects, except for Vidal-Bralo, which showed a significant negative mediation effect of -11% (95%CI: -44%- -2.3%). No DNA methylation or clinical biomarkers demonstrated significant mediation effects in the comparison between other races and White participants due to small sample size.

### **The mediating roles of DNA methylation measures and clinical factors in the association between education and all-cause mortality**

The mediation analysis for educational mortality disparities is shown in Figure 3 and Supplementary

Table 4. The patterns of mediation were consistent across all comparisons of educational attainment levels. Physiologically trained clocks showed stronger effects compared to other types of clocks. GrimAge, GrimAge2, and DunedinPoAm epigenetic age exhibited significant mediation effects across all comparisons, ranging from 11% (95%CI: 2.8%-28%) to 32% (95%CI: 17%-64%), which were higher than the smoking pack-years, the leading clinical biomarkers. Horvath predicted telomere mediated 5.3% (95%CI: 1.7%-10%) and 5.7% (95%CI: 1.9%-13%) of the mortality disparities for participants with less than a high school education and those with a high school degree or educational development program (GED), respectively. In addition, PhenoAge epigenetic age mediated 6.5% (95%CI: 2.4%-14%) of the difference between participants with less than a high school education and those with a college degree, and Hannum epigenetic age showed a marginally significant positive mediation of 4.4% (95%CI: 0.3%-13.4%) between participants with a high school degree or GED and those with a college degree or higher.

### **The mediating roles of DNA methylation measures and clinical factors in the association between household income and all-cause mortality**

The mediation analysis for income-related disparities in all-cause mortality is presented in Figure 4 and Supplementary Table 5. The results followed patterns similar to those observed for educational attainment. PhenoAge, GrimAge, GrimAge2, Horvath predicted telomere, and DunedinPoAm showed significant positive proportion of mediation effects with smaller effects compared to the results from education attainment, but still greater effects compared to all the clinical mediators. GrimAge, GrimAge2, and DunedinPoAm epigenetic age significantly mediated effects across all group comparisons ranging from 14% (95%CI: 6.6%-29%) to 37% (95%CI: 22%-58%). In addition, PhenoAge and Horvath predicted telomere significantly mediated part of the group comparisons, ranging from 3.7% (95%CI: 0.3%-11%) to 8.3% (95%CI: 2.5%-17%).

### **The mediating roles of DNA methylation measures and clinical factors in the association between occupation and all-cause mortality**

The mediation of DNA methylation clocks on occupation-related disparities is shown in Figure 5 and Supplementary Table 6. Compared to the white-collar and professional participants, individuals in semi-routine white-collar and those who had never worked did not show significant mediations of any DNA methylation clocks and clinical biomarkers. For the

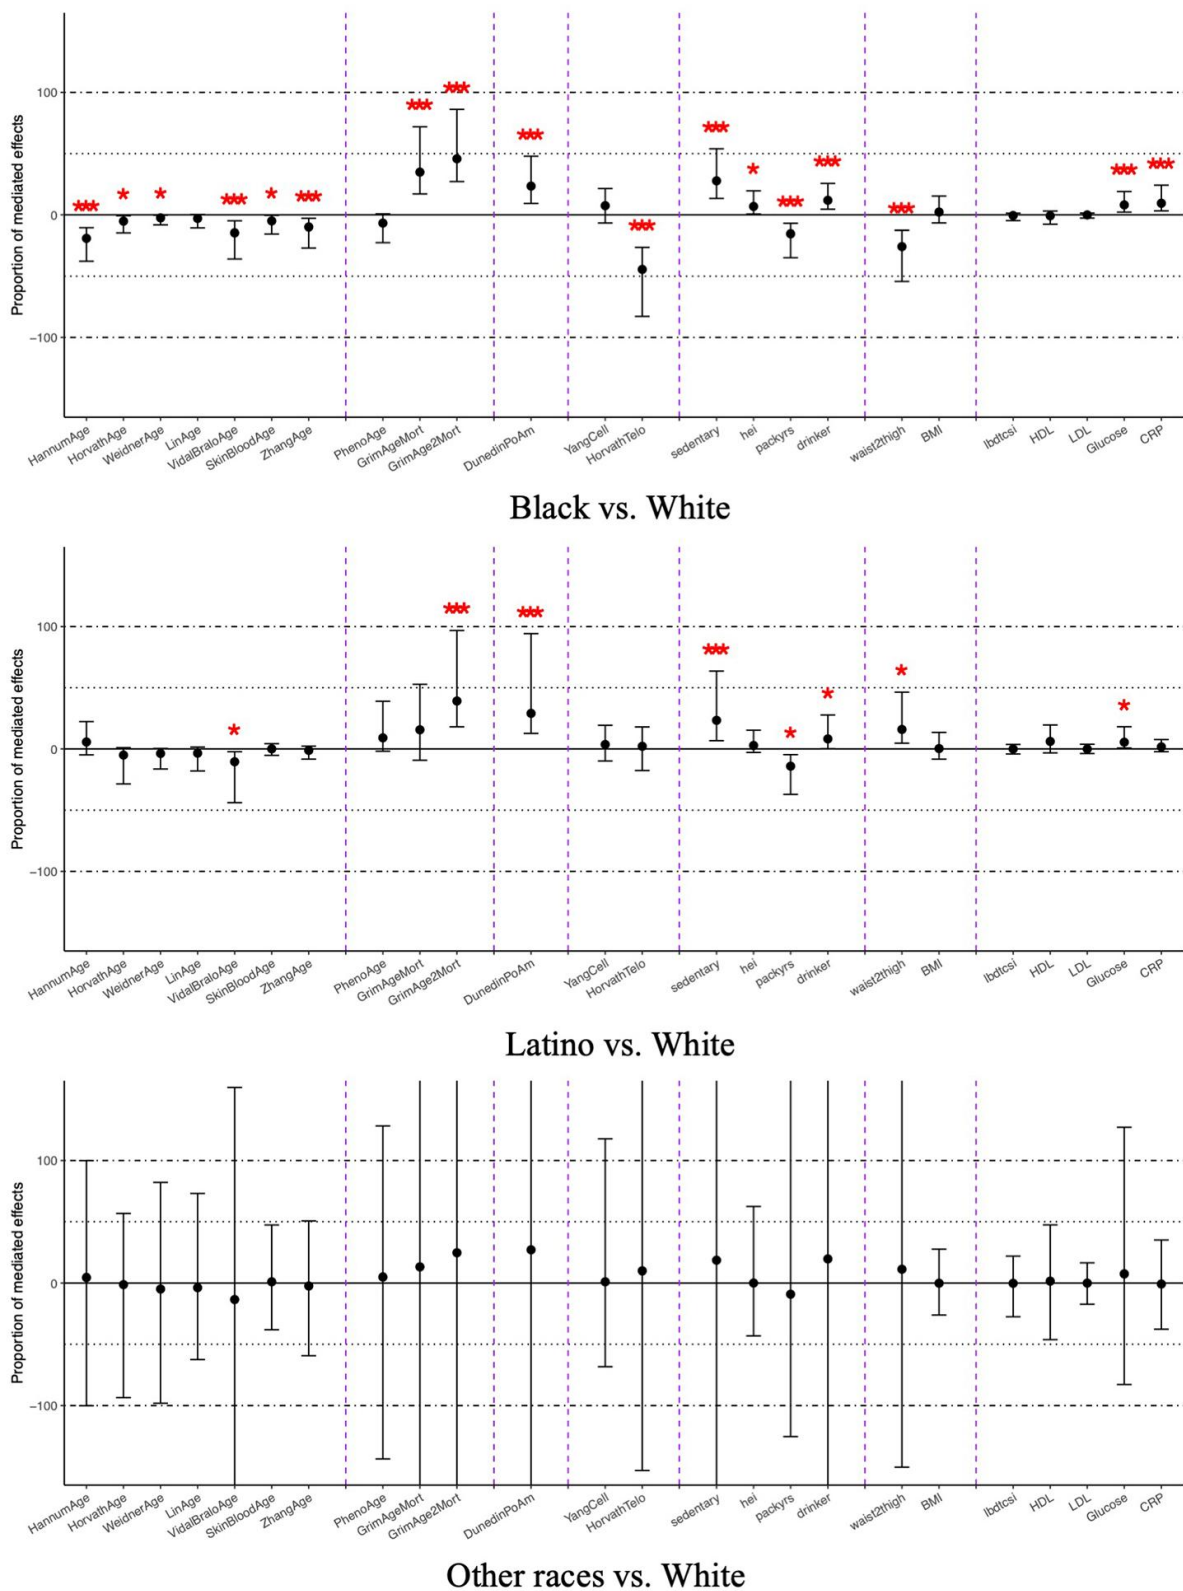

**Figure 2. Average mediated proportions for DNA methylation and clinical mediators on the relationship between race and ethnicity and all-cause mortality, NHANES 1999-2002 (n=2,402).** Coefficients marked with one asterisk indicate statistical significance ( $p < 0.05$ ), and those with three asterisks indicate significance after Bonferroni correction ( $p < 0.0021$ ). The x-axis is ordered as chronological age clocks, physiological functioning clocks, pace-of-aging clock, clocks trained on other aging biomarkers, and behavioral, anthropometric, and clinical mediators.

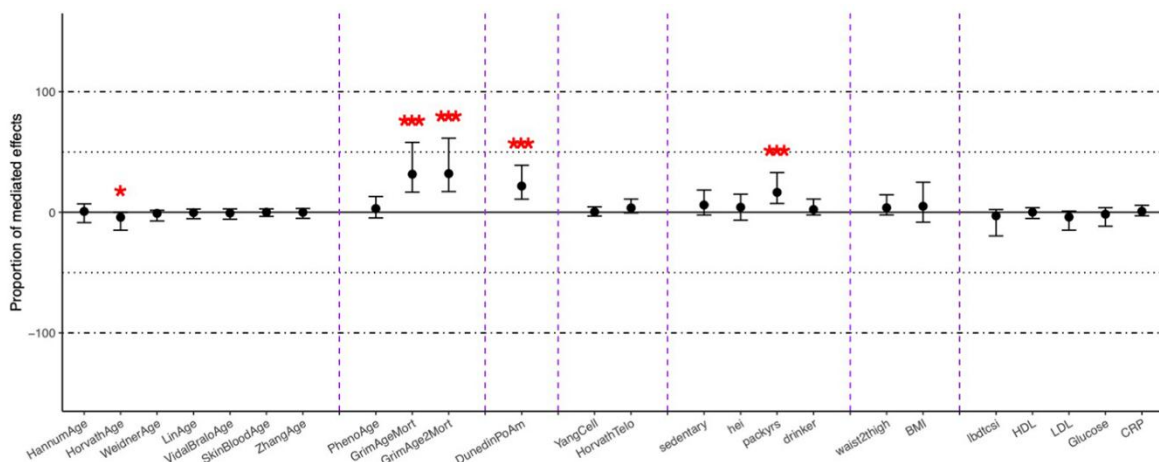

### Some college or associates degree vs. College degree or higher

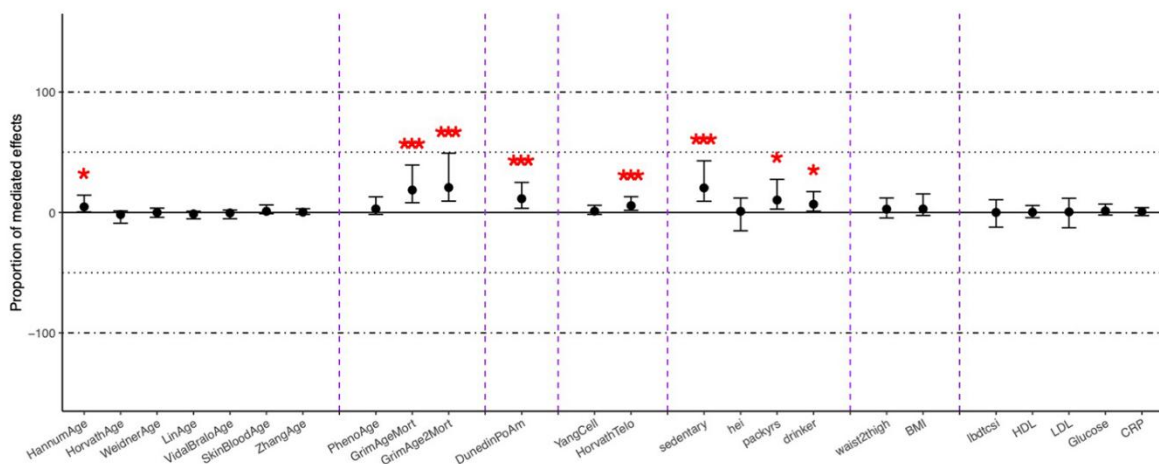

### High school graduate or GED vs. College degree or higher

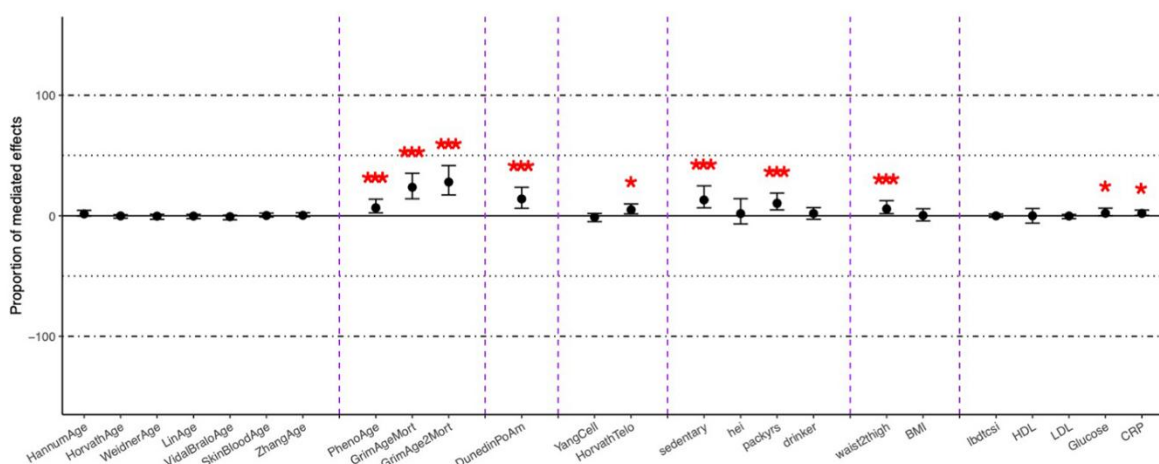

### Less than high school vs. College degree or higher

**Figure 3. Average mediated proportions for DNA methylation and clinical mediators on the relationship between education attainment and all-cause mortality, NHANES 1999-2002 (n=2,402).** Coefficients marked with one asterisk indicate statistical significance ( $p < 0.05$ ), and those with three asterisks indicate significance after Bonferroni correction ( $p < 0.0021$ ). The x-axis is ordered as chronological age clocks, physiological functioning clocks, pace-of-aging clock, clocks trained on other aging biomarkers, and behavioral, anthropometric, and clinical mediators.

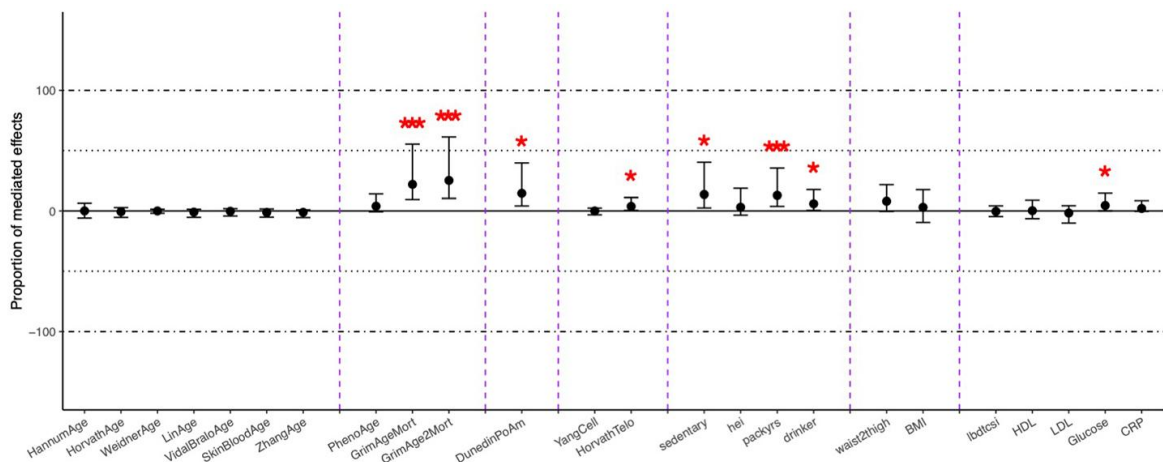

PIR 2-5 vs. PIR 5+

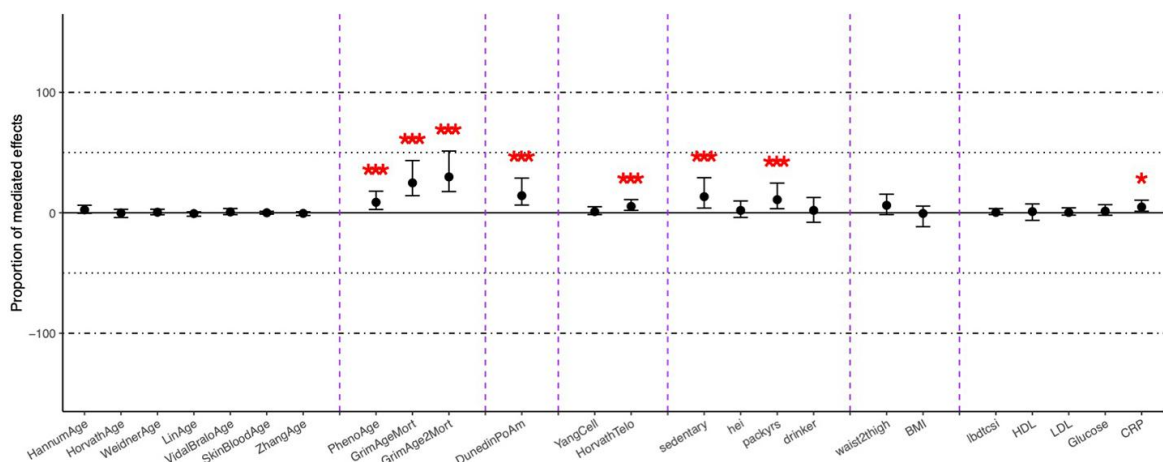

PIR 1-2 vs. PIR 5+

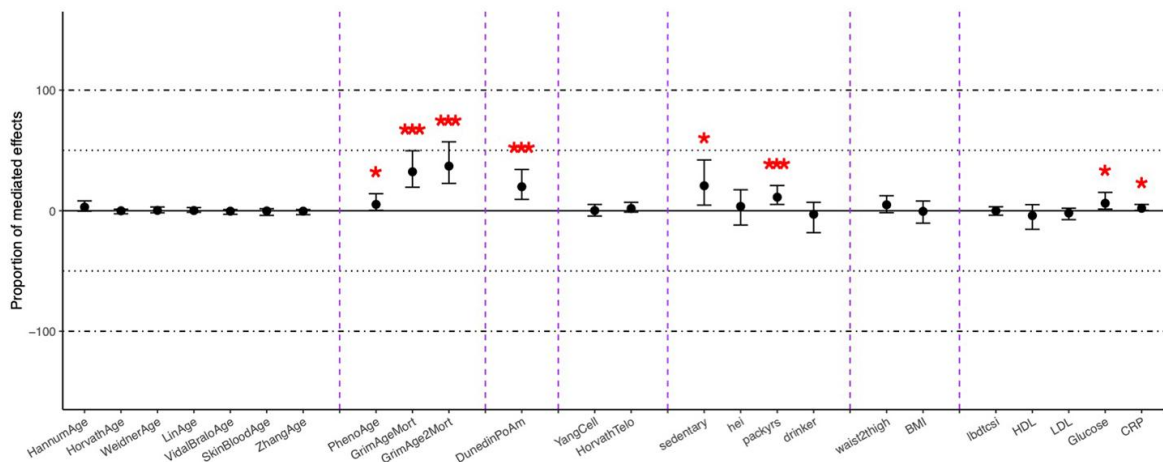

PIR <1 vs. PIR 5+

**Figure 4. Average mediated proportions for DNA methylation and clinical mediators on the relationship between household income and all-cause mortality, NHANES 1999-2002 (n=2,402).** Coefficients marked with one asterisk indicate statistical significance ( $p < 0.05$ ), and those with three asterisks indicate significance after Bonferroni correction ( $p < 0.0021$ ). The x-axis is ordered as chronological age clocks, physiological functioning clocks, pace-of-aging clock, clocks trained on other aging biomarkers, and behavioral, anthropometric, and clinical mediators.

comparison between high-skilled and semi-routine blue-collar and white-collar/professional participants, physiologically trained clocks again showed stronger effects compared to other types of clocks and clinical mediators. GrimAge, GrimAge2, and DunedinPoAm epigenetic age mediated 25% (95%CI: 14%-67%) up to 52% (95%CI: 26%-128%). In addition, Hannum, PhenoAge, and Horvath predicted telomere mediated 10% (95%CI: 2.2%-27%), 9.0% (95%CI: 2.1%-35%), and 6.1% (95%CI: 0.9%-16%) of the mortality disparities, respectively, when comparing high-skilled blue-collar workers to white-collar professionals.

### Secondary analysis of cause-specific mortality disparities

The exposure survival analysis for cause-specific mortality is also presented in Supplementary Table 1. For cardiovascular-specific mortality, due to the smaller sample size, only the comparisons between Black and White participants and between participants with a poverty income ratio (PIR) of less than 1 and those with a PIR of 5 or above remained significant with a HR of 2.12 (95%CI: 1.25-3.58) and 4.33 (95%CI: 1.63-11.51), respectively. For cancer-specific mortality, only models for educational attainment and occupational status showed significant results. Compared to participants with a college degree or higher, those with less than a high school education (HR=3.53, 95%CI: 1.43-8.70), a high school diploma or GED (HR=3.21, 95%CI: 1.41-7.29), and some college (HR=3.34, 95%CI: 1.52-7.33) had significantly higher risks. Similarly, participants in

high-skilled blue-collar (HR=2.63, 95%CI: 1.50-4.63) and semi-routine blue-collar (HR=1.95, 95%CI: 1.13-3.34) occupations had significantly higher cancer-specific mortality risks compared to white-collar professionals. The mediator survival analysis for both cardiovascular- and cancer- specific mortality are shown in Supplementary Table 2. GrimAge, GrimAge2, and DunedinPoAm epigenetic age exhibited significant effects similar to the all-cause mortality results. For cancer-specific mortality only, more clocks showed significant associations, with HRs ranging from 1.04 (95%CI: 1.01-1.07) to 1.05 (95%CI: 1.02-1.07), including Hannum, Horvath, Vidal-Bralo, and PhenoAge.

The mediation analysis for cause-specific mortality had lower statistical power than for all-cause mortality (Supplementary Tables 7-14). For racial disparities, comparing Black and White participants, GrimAge, GrimAge2, and DunedinPoAm epigenetic age significantly mediated 17% (95%CI: 6.6%-56%), 23% (95%CI: 8.7%-63%), and 10% (95%CI: 2.0%-37%) of the cardiovascular-specific mortality disparity, respectively, though these effects were smaller than that of sedentary behavior (mediated proportion=26%; 95%CI: 11%-92%) (Supplementary Table 7). However, for cardiovascular disparities between those with a PIR <1 and those with a PIR ≥5, GrimAge and GrimAge2 epigenetic age mediated 23% (95%CI: 11%-50%) and 26% (95%CI: 11%-62%) which were higher than other clinical mediators (Supplementary Table 9). In cancer-specific mortality disparities, GrimAge, GrimAge2, and

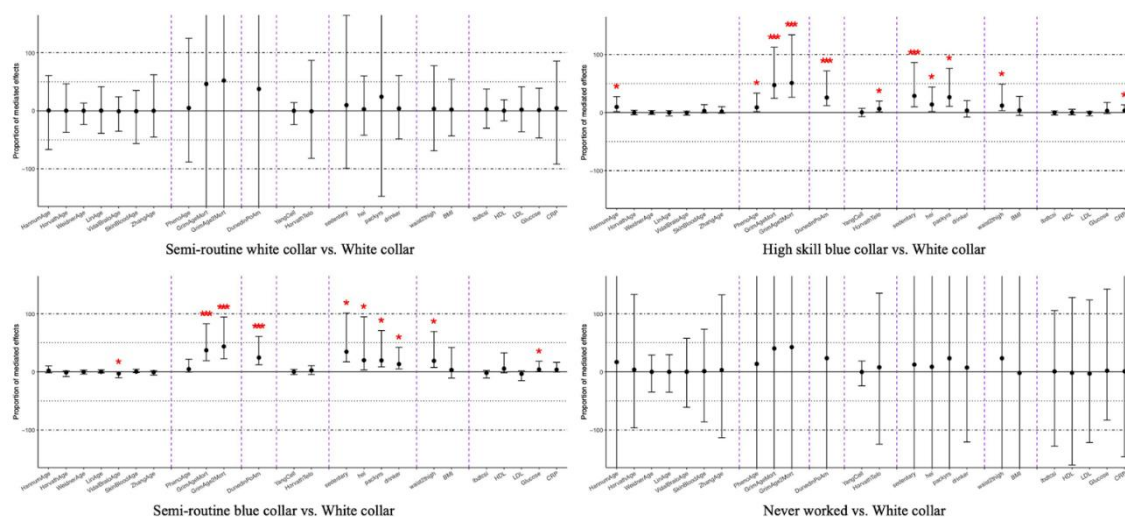

**Figure 5. Average mediated proportions for DNA methylation and clinical mediators on the relationship between occupation status and all-cause mortality, NHANES 1999-2002 (n=2,402).** Coefficients marked with one asterisk indicate statistical significance ( $p < 0.05$ ), and those with three asterisks indicate significance after Bonferroni correction ( $p < 0.0021$ ). The x-axis is ordered as chronological age clocks, physiological functioning clocks, pace-of-aging clock, clocks trained on other aging biomarkers, and behavioral, anthropometric, and clinical mediators.

DunedinPoAm epigenetic age also demonstrated significant mediation for education- and occupation-related disparities, with mediated proportion ranging from 6.5% (95%CI: -3.4%-21%) to 30% (95%CI: 12%-66%). These three DNA methylation epigenetic age measures mediated even larger proportions for income-related cancer-specific mortality disparities with 76% (95%CI: 30%-326%), 80% (95%CI: 28%-416%), and 54% (95%CI: 12%-241%), respectively (Supplementary Table 13).

### **Sensitivity analysis of all-cause mortality stratified by subgroups**

The mediation analysis stratified by gender is shown in Supplementary Tables 15–22. Although no significant difference was found, it is interesting to notice that the mediation signals for all-cause mortality disparities between Hispanic and White participants and people from different levels of household incomes were primarily driven by women, in comparison to all-cause mortality disparities between Black and White participants, people from different levels of education attainments, and individuals from different levels of occupation status were driven by men. The mediation analysis stratified by race and ethnicity is presented in Supplementary Tables 23–31. Again, although no significant difference shown across different races and ethnicities, DNA methylation biomarkers showed the most signals among White participants and then followed by Black participants. No significant signals were observed for Hispanic participants.

For more sensitivity analysis, we provided the results for all ten components of GrimAge2 in Supplementary Tables 32–35. These results showed that overall mediation effects of GrimAge2 were larger than that of any individual component, with the pack-years component showing the strongest effect among them. We also provided sensitivity analysis using completed cases only in Supplementary Tables 36–39. The results showed similar patterns compared to our main results using the imputed dataset. In addition, we provided testing results for exposure-mediator interaction and non-linear square term effects of each mediator on all-cause mortality in Supplementary Tables 40, 41. As the results demonstrated there was no consistent evidence across groups showing significant interactions between exposures and mediators in Supplementary Table 40. Supplementary Table 41 also suggested there was no evidence showing any non-linear effects of DNA methylation clocks on the all-cause mortality outcomes, although among clinical mediators, BMI, total cholesterol, and C-reactive protein presented significant square terms with betas that ranged from -0.037 to 0.066.

## **DISCUSSION**

Aiming to systematically examine the mediating role of DNA methylation clocks in the associations between race, ethnicity, education, income, and occupation and mortality, this study uses nationally representative data to demonstrate that DNA methylation clocks, particularly GrimAge2 and DunedinPoAm, mediate a substantial proportion of racial/ethnic and socioeconomic disparities in mortality, consistent with our hypothesis. GrimAge2 exhibited significant mediation on all-cause mortality disparities, accounting for 21% of the difference between participants with a high school diploma or GED and those with a college degree or higher, up to 52% of the difference between individuals in high-skilled blue-collar occupations and those in white-collar and professional positions. Similarly, the DunedinPoAm pace of aging mediated 11% of the mortality disparity between high school graduates and individuals with a college degree or above, and 28% of the disparity between Hispanic and White participants. Notably, these mediation results, particularly for GrimAge2, were greater than those observed for traditional clinical biomarkers. These findings suggest that DNA methylation clocks and biomarkers could serve as valuable tools for future research investigating the mechanisms underlying health disparities and for the more rapid evaluation of the potential long-term impacts of policy changes.

Results supporting our hypothesis that DNA methylation clocks are good biomarkers for mortality outcomes, especially GrimAge2, are consistent with previous literatures. A few studies have explored the mediating effects of GrimAge and GrimAge2 on mortality disparities. A 2022 meta-analysis integrating data from 18 cohorts across multiple countries found that GrimAge mediated 60% of the mortality disparity between men with lower than upper secondary education and those with upper secondary education or higher, an effect stronger than that observed for other clocks, including Hannum, Horvath, and PhenoAge [24]. Similarly, a study using data from Framingham Heart Study reported that GrimAge mediated 63% of the association between education attainment and all-cause mortality, again exceeding the mediation effects observed for other clocks [27]. Although these studies have suggested that much of the mediation effects could be attributed to differences in unhealthy lifestyles, such as smoking, alcohol consumption, high BMI, low physical activity, and chronic conditions including hypertension and diabetes, our study extends this literature by directly comparing the mediation effects between GrimAge and GrimAge2 with those of traditional clinical biomarkers within the same dataset. In addition, we demonstrate that GrimAge2 reported

greater mediated proportions for social inequalities in mortality disparities than any single clinical measure. For cause-specific mortality, one study found that GrimAge mediated up to 24% of the association between household income and cardiovascular mortality, a larger effect than that observed for other causes of death [26]. In contrast, our analyses show that both GrimAge and GrimAge2 mediated a significant portion of all-cause, cardiovascular-specific, and cancer-specific mortality with the largest proportion observed for cancer mortality disparities between people living under poverty and people with PIR  $\geq 5$ , up to 80%. This difference may reflect variation in study populations, as the prior study was restricted to participants with cardiovascular-kidney-metabolic syndrome, suggesting that the GrimAge clock may perform more strongly among healthier populations.

Regarding the performance of other DNA methylation clocks, Graf et al. [27] found that DunedinPACE (a later version of DunedinPoAm) mediated 50% of the association between education attainment and all-cause mortality. In comparison, our study found DunedinPoAm mediated 11% to 22% of this association. This difference may reflect the use of an earlier version of the Dunedin clock in our analysis. In addition, Fiorito and colleagues [24] reported that the Horvath, Hannum, and PhenoAge epigenetic age mediated 21%, 26%, and 33% of education-related mortality disparities among men, respectively. Similarity, a study using data from Women's Health Initiative found that PhenoAge mediated 12% of mortality disparities by race (Black vs. White) and 16% by educational attainment (less than high school vs. college degree or higher) among women [25]. In our study, PhenoAge significantly mediated 6.6% of the mortality disparity associated with lower educational attainment (less than high school vs. college degree or higher) but showed no significant mediation ability for other social factors. Together, these findings may suggest that some epigenetic clocks, especially the clocks trained on chronological age, may have limited mediation utility when generalized to nationally representative populations.

Our study has implications for why DNA methylation biomarkers showed a wide range of mediated effects on social inequalities, which is not consistent with our original hypothesis. As demonstrated by the correlation analysis in our study, DNA methylation biomarkers carry different aspects of signals rather than belonging to one cluster of epigenetic information. Although physiologically trained clocks and the pace of aging clock performed better in the mediation analysis (particularly GrimAge2 and DunedinPoAm), clocks trained on chronological age, cancer biomarkers, or

telomere length may still provide complementary information worthy of future investigation. Interestingly in our results, some of these clocks negatively mediated the all-cause mortality disparities between Black and White participants, especially Horvath predicted telomere mediated -44%. One explanation could be the protective role of telomere-related mechanisms in racial mortality disparities. While no prior studies have directly examined telomere length as a mediator of racial health disparities in mortality, existing evidence supports this hypothesis. As well documented in previous literature, longer leukocyte telomere length is associated with lower risk of mortality [28–31]. A number of studies also have reported that Black adults, on average, have longer telomeres than their White counterparts [32, 33]. Building on this evidence, our findings imply that for Black and White Americans with equivalent telomere lengths, racial disparities in mortality might be even greater than those observed in studies without accounting for telomere length. Another explanation could be that these biomarkers are associated with other important variables on the pathway. For example, both Hannum epigenetic age and Horvath predicted telomere were suggested on the causal pathway of social support affecting mortality risks [34]. African American may have on average stronger social connections, which is protective for them to counter racial disparities in mortality. These hypotheses suggest that African Americans with shorter telomeres and low social connections may represent a particularly vulnerable subgroup for mortality disparities.

In addition, consistent with our hypothesis, our results indicate that DNA methylation can potentially be developed as a better composite biomarker for measuring biological embeddedness for social disadvantages in the future. Previous studies have explored the effects of clinical variables in cohorts from various countries showing clinically measured variables, including diagnoses of chronic diseases, even combining can only mediate up to moderate effects of mortality disparities originated from social stratifications [35–38]. For example, a previous study combining 179,090 participants reported a joint mediation of smoking, alcohol consumption, dietary patterns, physical activity, BMI, hypertension, diabetes, and coronary artery disease, account 34% and 38% in women and men separately [35]. Therefore, our results showing DNA methylation biomarkers mediated a bigger proportion than these effects suggest promising utility for capturing social health inequalities.

This study examined the mediation effects of thirteen DNA methylation epigenetic biomarkers on mortality disparities across multiple individual social stratification indicators, including race, ethnicity,

educational attainment, household income, and occupation, by taking advantage of a nationally representative probability-based sample. However, several limitations should be noted. First, although causal mediation models were used, the cross-sectional design of this study limits causal inference. While socioeconomic factors likely preceded DNA methylation measures, our results remain vulnerable to potential reverse causality of the effects flowing from health to socioeconomic position, particularly income [8]. For example, worse health may lead to reduced labor force participation and, in turn, lower income [39]. Due to the cross-sectional design of our study, we could not differentiate directionality in our findings. Further studies with longitudinal design are needed to validate our results related to household income. Second, studies have suggested that factors such as gender, marital status, and birth year may modify the effects of mortality disparities associated with socioeconomic positions [40]. Previous research also has shown DNA methylation clocks can perform differently by gender and race [24, 41]. Although our results did not show any significant modification effects by gender and race, it still needs to be cautiously interpreted among different subgroups. Further studies with larger sample sizes should explore subgroup differences and the underlying mechanisms of these modification effects. Third, as our study sample was restricted to individuals aged 50 to 84, the findings may not be generalized to younger population. Additional research is needed to investigate whether similar DNA methylation-based mediation effects can be observed in younger cohorts. Fourth, this study only conducted single mediation analysis for each individual epigenetic and clinical biomarker due to the limits of our current methods used. Future studies are needed to explore combining the mediation ability across these epigenetic, clinical biomarkers and other potential candidate mediators with advanced statistical methods to better capture the complexity of the associations. Fifth, recent literature has indicated using packages of multiple imputation and mediation with confidence intervals calculated by non-parametric bootstrap method at the same time may introduce potential biases [42, 43]. The exact values of our estimates may need to be interpreted with caution even though the main analysis and complete case analysis showed same patterns. Sixth, our study has only considered linear terms for the mediators due to the limits of our modelling method. Studies have suggested some mediators, such as BMI [44], can have potential nonlinear effects on mortality outcomes. Future studies should use complex mediation models to explore the nonlinear effects for these biomarkers. Seventh, our study compared the effects on a relative scale but not on the absolute scale. Absolute inequalities are

important for public health interventions because it can provide further information on the scale of the impacts on population. Future studies should explore if the estimates would be different by absolute scale. Lastly, genetic ancestries may serve as an important confounder influencing both exposures and DNA methylation biomarkers, given their strong correlation with self-reported race and ethnicity. Because genetic ancestry information was not available in this dataset, it remains uncertain how this unmeasured factor may have shaped our findings. Future research incorporating genetic ancestry data could help clarify the extent to which observed associations reflect underlying biological variation versus socially patterned differences that covary with ancestry and race.

In conclusion, this study contributes to the growing body of evidence demonstrating that DNA methylation clocks mediate a substantial proportion of mortality disparities associated with adverse social exposures, with stronger effects than traditional clinical biomarkers. These findings also underscore the potential of DNA methylation measures as valuable tools for understanding the biological embedding of social disadvantages. Further research using longitudinal study designs and larger sample sizes is needed to validate these results and clarify the mechanisms underlying these associations. As more insights emerge regarding the role of DNA methylation clocks and biomarkers, these measures may prove useful in future studies evaluating the broader impact of social policies and identifying vulnerable populations for targeted long-term disease prevention efforts.

## MATERIALS AND METHODS

### The NHANES participants

We analyzed the participants from the U.S. National Health and Nutrition Examination Survey (NHANES) 1999-2000 and 2001-2002 cycles who had publicly available DNA methylation clock measurements. Eligible participants were non-Hispanic White, non-Hispanic Black, Hispanic, and other races (including multi-racial participants), aged 50 years or older who had a blood sample collected at baseline and consented to future genetic research. Further details on the methodology of DNA methylation data are available on the NHANES website [45]. Participants were included in this study if they had non-zero DNA methylation specific weights (N=2,532). We excluded individuals who were 85 years and older (N=130) since NHANES does not report the exact ages for this group. After exclusion, the final study sample consisted of 2,402 participants.

## Socioeconomic position measures

Socioeconomic position measures were derived from NHANES baseline questionnaires, with all variables being self-reported and publicly available. Educational attainment was assessed as the highest self-reported level of education completed by participants. This variable was classified as less than high school, high school graduate or general educational development program (GED), some college or an associate's degree, and a college degree or higher.

Household income was measured using the poverty income ratio (PIR), defined as the ratio of a participant's household income to the federal poverty levels from Department of Health and Human Services' (HHS) poverty guidelines. To facilitate comparisons, household income was categorized into four groups: below the poverty line ( $PIR < 1$ ),  $PIR 1-2$ ,  $PIR 2-5$ , and  $PIR \geq 5$  for comparison with other work [46, 47].

The longest held occupation of the participants was used to define their occupational status. When data on the longest held occupation was missing, the reported current occupation was used to fill the missing values. Occupational status was categorized into five groups: white-collar and professional, semi-routine white-collar, high-skilled blue-collar, semi-routine blue-collar, and never worked, according to the National Statistics Socio-Economic Classification [48].

## Epigenetic aging and clinical mediators

Thirteen DNA methylation clocks available in NHANES were included in this analysis. Clocks trained on chronological age included Hannum [49], Horvath [50], Weidner [51], Lin [52], VidalBralo [53], SkinBlood [54], and Zhang [55]. Clocks trained to predict morbidity or mortality included PhenoAge [56], GrimAge [57], and GrimAge2 [58]. In addition, the pace of aging clock DunedinPoAm [59], which was trained on aging rates measured across multiple organ systems, was included. Other clocks trained on aging biomarkers such as Yang [60] which was trained on cancer biomarkers, and Telomere [61] which was trained on leukocyte telomere length were also included.

To assess the mediation effects for traditional clinical measures from established biological pathways, additional clinical measures were included in tests of proportion mediated. For behavioral variables, we included physical activity (sedentary vs. active), the 2015 health eating index (HEI) [62], smoking pack-years, and drinking behaviors (abstainer vs. alcohol drinker). Anthropometric measures included waist-to-high ratio and body mass index (BMI). Clinical

biomarkers included total cholesterol, high-density lipoprotein (HDL), low-density lipoprotein (LDL), glucose, and C-reactive protein (CRP). Physical activity status was defined as sedentary if participants did not report any vigorous, moderate, or muscle-strengthening activities over the past 30 days [63].

## Mortality outcomes and covariates

Mortality data were obtained from the National Center for Health Statistics publicly available mortality files, which track deaths through linkage with the National Death Index (NDI). Participants were classified as deceased if their records were linked to the NDI by December 31, 2019, and were assumed to be alive otherwise. The underlying cause of death as recorded in the NDI has been validated with an estimated classification error of approximately 5% [64]. The maximum follow-up period was 17 years. The age at death or loss of follow-up was used as the survival outcome. All-cause mortality was examined as the primary event with loss to follow-up considered as censored, while cause-specific mortality from either cardiovascular disease or cancer were evaluated as the secondary and exploratory event with all other deaths and loss to follow-up both considered as censored. As shown in the directed acyclic graph (DAG) presented in Supplementary Figure 1, covariates controlled in the model included gender (women vs. men), baseline age and baseline age<sup>2</sup> (to account for potential non-linear effects of age on predictor and outcome variables), and nativity (U.S.-born vs. foreign-born).

## Statistical modeling

Descriptive analyses were performed using means and standard deviations for continuous variables, and frequencies with percentages for categorical variables. A nonparametric random forest multiple imputation method was used to impute the missingness in exposures, covariates, and clinical mediators (*missForest* package in R [65, 66]). All the participants from 1999-2002 cycle (N = 21,004) were used to impute missing values. This package is designed to handle data that are Missing at Random (MAR). Correlation analyses to show the clusters across all DNA methylation biomarkers were conducted using R functions *rcorr*. Survival analyses were conducted using a Weibull model implemented in the *survey* package in R, incorporating NHANES DNA methylation specific survey weights to account for the complex survey design. Hazard ratios (HR) and 95% confidence intervals (CI) were reported. Only linear terms of mediators were included in the models, and Wald-test was used to test the non-linear square term effects of mediators in the associations between mediator and outcome.

Mediation analyses were conducted using the *mediation* package in R [67], estimating average mediated proportions along with their 95% CIs. This package outputs mediation proportions ranging from negative infinity to positive infinity. A negative mediated proportion indicates that the exposure and mediator have effects on the outcome in opposite directions, whereas a mediated proportion greater than 100% indicates that the mediator captures an effect in the same direction that is larger than the total effect of the exposure on the outcome. Exposure may influence an outcome through multiple pathways, producing both beneficial and detrimental effects that operate in different directions. As a result, the overall effect estimate may be attenuated relative to the true causal effect in that direction. This phenomenon is particularly relevant for social exposures, as some adverse social conditions may also be associated with social cohesion and resilience [5, 14]. A more detailed discussion is included in Appendix 1.

This mediation model uses a potential outcome framework to estimate mediation effects. We used a parametric approach within this package, which means the estimates will be calculated from the regression parameters and the standard errors will be calculated from bootstrap method. The assumptions of this approach include 1) no unobserved pre-treatment confounding between social positions and mortality outcomes besides the covariates already controlled; 2) no unobserved pre-treatment and post-treatment confounding for the associations of DNA methylation clocks and mortality outcomes; 3) sufficient overlap in the distributions of social position and DNA methylation clocks across covariates. A more detailed discussion of how well our study met the assumption is included in Appendix 2. The package built-in function *test.TMint* was used to test if there were interactions between exposures and mediators. Results with a p-value of <0.05 were considered as marginally significant, and a p-value of <0.0021 (0.05/24, as there was total 24 mediators included in the study) were considered as significant results that passed multiple testing. Sensitivity analyses conducted among different gender and racial subgroups were also presented. All statistical analyses were performed using R version 4.5.0. The R code and data used for these analyses are provided in a GitHub repository ([https://github.com/shywatson/SES\\_DNAm\\_NHANES](https://github.com/shywatson/SES_DNAm_NHANES)).

## AUTHORS CONTRIBUTIONS

Conceptualization and Methodology, HS and DR; Formal analysis, Original Draft, Writing: HS; Visualization: HS, NG, and DR. Review and Editing: HS, NG, TF, AC, BN and DR. Supervision: DR.

## CONFLICTS OF INTEREST

The authors declare that they have no conflicts of interest.

## ETHICAL STATEMENT AND CONSENT

NHANES participants provided verbal consent for the household interview and written informed consent at the Mobile Examination Center prior to physical examinations. Participation is voluntary, and individuals may withdraw at any time. All study protocols were reviewed and approved by the National Center for Health Statistics Ethics Review Board to ensure the protection of participants' rights and compliance with the U.S. federal regulations. To protect participant confidentiality, all personal identifiable information is removed before the data is made publicly available.

## FUNDING

This research has been supported by NIMHD of the National Institutes of Health under award number R01MD011721 (PIs: Belinda Needham and David Rehkopf).

## REFERENCES

1. Adler NE, Boyce WT, Chesney MA, Folkman S, Syme SL. Socioeconomic inequalities in health. No easy solution. *JAMA*. 1993; 269:3140–5. <https://doi.org/10.1001/jama.269.24.3140> PMID:[8505817](https://pubmed.ncbi.nlm.nih.gov/8505817/)
2. Glymour MM, Avendano M, Kawachi I. Socioeconomic status and health. *Soc Epidemiol*. Oxford University Press Oxford. 2014; 2:17–63. <https://doi.org/10.1093/MED%2F9780195377903.003.0002>
3. Krieger N, Williams DR, Moss NE. Measuring social class in US public health research: concepts, methodologies, and guidelines. *Annu Rev Public Health*. 1997; 18:341–78. <https://doi.org/10.1146/annurev.publhealth.18.1.341> PMID:[9143723](https://pubmed.ncbi.nlm.nih.gov/9143723/)
4. Phelan JC, Link BG. Fundamental cause theory. *Medical sociology on the move: New directions in theory*. Springer; 2013:105–25. <https://doi.org/10.1007/978-94-007-6193-3>
5. Diez Roux AV. Social Epidemiology: Past, Present, and Future. *Annu Rev Public Health*. 2022; 43:79–98. <https://doi.org/10.1146/annurev-publhealth-060220-042648> PMID:[34982586](https://pubmed.ncbi.nlm.nih.gov/34982586/)
6. Arias E, Tejada-Vera B, Kochanek KD, Ahmad FB. Provisional life expectancy estimates for 2021. 2022.

7. Singh GK, Lee H. Marked Disparities in Life Expectancy by Education, Poverty Level, Occupation, and Housing Tenure in the United States, 1997-2014. *Int J MCH AIDS*. 2021; 10:7–18.  
<https://doi.org/10.21106/ijma.402> PMID:33442488
8. Bosworth B. Increasing Disparities in Mortality by Socioeconomic Status. *Annu Rev Public Health*. 2018; 39:237–51.  
<https://doi.org/10.1146/annurev-publhealth-040617-014615> PMID:29608870
9. Vineis P, Avendano-Pabon M, Barros H, Bartley M, Carmeli C, Carra L, Chadeau-Hyam M, Costa G, Delpierre C, D'Errico A, Fraga S, Giles G, Goldberg M, et al. Special Report: The Biology of Inequalities in Health: The Lifepath Consortium. *Front Public Health*. 2020; 8:118.  
<https://doi.org/10.3389/fpubh.2020.00118> PMID:32478023
10. Evans GW, Kantrowitz E. Socioeconomic status and health: the potential role of environmental risk exposure. *Annu Rev Public Health*. 2002; 23:303–31.  
<https://doi.org/10.1146/annurev.publhealth.23.112001.112349> PMID:11910065
11. Chi GC, Hajat A, Bird CE, Cullen MR, Griffin BA, Miller KA, Shih RA, Stefanick ML, Vedal S, Whitsel EA, Kaufman JD. Individual and Neighborhood Socioeconomic Status and the Association between Air Pollution and Cardiovascular Disease. *Environ Health Perspect*. 2016; 124:1840–7.  
<https://doi.org/10.1289/EHP199> PMID:27138533
12. Harris KM, Schorpp KM. Integrating Biomarkers in Social Stratification and Health Research. *Annu Rev Sociol*. 2018; 44:361–86.  
<https://doi.org/10.1146/annurev-soc-060116-053339> PMID:30918418
13. Dowd JB, Goldman N. Do biomarkers of stress mediate the relation between socioeconomic status and health? *J Epidemiol Community Health*. 2006; 60:633–9.  
<https://doi.org/10.1136/jech.2005.040816> PMID:16790837
14. Rehkopf DH, Strully KW, Dow WH. The short-term impacts of Earned Income Tax Credit disbursement on health. *Int J Epidemiol*. Oxford University Press; 2014; 43:1884–94.  
<https://doi.org/10.1093/ije/dyu172>
15. Hillary RF, Stevenson AJ, McCartney DL, Campbell A, Walker RM, Howard DM, Ritchie CW, Horvath S, Hayward C, McIntosh AM, Porteous DJ, Deary IJ, Evans KL, Marioni RE. Epigenetic measures of ageing predict the prevalence and incidence of leading causes of death and disease burden. *Clin Epigenetics*. 2020; 12:115.  
<https://doi.org/10.1186/s13148-020-00905-6> PMID:32736664
16. Marioni RE, Shah S, McRae AF, Chen BH, Colicino E, Harris SE, Gibson J, Henders AK, Redmond P, Cox SR, Pattie A, Corley J, Murphy L, et al. DNA methylation age of blood predicts all-cause mortality in later life. *Genome Biol*. 2015; 16:25.  
<https://doi.org/10.1186/s13059-015-0584-6> PMID:25633388
17. Austin MK, Chen E, Ross KM, McEwen LM, MacIsaac JL, Kobor MS, Miller GE. Early-life socioeconomic disadvantage, not current, predicts accelerated epigenetic aging of monocytes. *Psychoneuroendocrinology*. 2018; 97:131–4.  
<https://doi.org/10.1016/j.psyneuen.2018.07.007> PMID:30016711
18. Crimmins EM, Klopach ET, Kim JK. Generations of epigenetic clocks and their links to socioeconomic status in the Health and Retirement Study. *Epigenomics*. 2024; 16:1031–42.  
<https://doi.org/10.1080/17501911.2024.2373682> PMID:39023350
19. George A, Hardy R, Castillo Fernandez J, Kelly Y, Maddock J. Life course socioeconomic position and DNA methylation age acceleration in mid-life. *J Epidemiol Community Health*. 2021; 75:1084–90.  
<https://doi.org/10.1136/jech-2020-215608> PMID:33906906
20. Hicken MT, Dou J, Kershaw KN, Liu Y, Hajat A, Bakulski KM. Racial and Ethnic Residential Segregation and Monocyte DNA Methylation Age Acceleration. *JAMA Netw Open*. 2023; 6:e2344722.  
<https://doi.org/10.1001/jamanetworkopen.2023.44722> PMID:38019517
21. Petrovic D, Carmeli C, Sandoval JL, Bodinier B, Chadeau-Hyam M, Schrempft S, Ehret G, Dhayat NA, Ponte B, Pruijm M, Vineis P, Gonseth-Nusslé S, Guessous I, et al. Life-course socioeconomic factors are associated with markers of epigenetic aging in a population-based study. *Psychoneuroendocrinology*. 2023; 147:105976.  
<https://doi.org/10.1016/j.psyneuen.2022.105976> PMID:36417838
22. Raffington L, Belsky DW. Integrating DNA Methylation Measures of Biological Aging into Social Determinants of Health Research. *Curr Environ Health Rep*. 2022; 9:196–210.  
<https://doi.org/10.1007/s40572-022-00338-8> PMID:35181865
23. Needham BL, Gladish N, Shen H, Liu Y, Smith JA, Mukherjee B, Zhou X, Rehkopf DH. Racial and ethnic

- differences in epigenetic aging: The National Health and Nutrition Examination Survey, 1999-2002. *PLoS One*. 2025; 20:e0327010.  
<https://doi.org/10.1371/journal.pone.0327010>  
PMID:40668752
24. Fiorito G, Pedron S, Ochoa-Rosales C, McCrory C, Polidoro S, Zhang Y, Dugué PA, Ratliff S, Zhao WN, McKay GJ, Costa G, Solinas MG, Harris KM, et al., and Lifepath consortium. The Role of Epigenetic Clocks in Explaining Educational Inequalities in Mortality: A Multicohort Study and Meta-analysis. *J Gerontol A Biol Sci Med Sci*. 2022; 77:1750–9.  
<https://doi.org/10.1093/gerona/glac041>  
PMID:35172329
25. Liu Z, Chen BH, Assimes TL, Ferrucci L, Horvath S, Levine ME. The role of epigenetic aging in education and racial/ethnic mortality disparities among older U.S. Women. *Psychoneuroendocrinology*. 2019; 104:18–24.  
<https://doi.org/10.1016/j.psyneuen.2019.01.028>  
PMID:30784901
26. Wu S, Zhu J, Lyu S, Wang J, Shao X, Zhang H, Zhong Z, Liu H, Zheng L, Chen Y. Impact of DNA-Methylation Age Acceleration on Long-Term Mortality Among US Adults With Cardiovascular-Kidney-Metabolic Syndrome. *J Am Heart Assoc*. 2025; 14:e039751.  
<https://doi.org/10.1161/JAHA.124.039751>  
PMID:40118808
27. Graf GH, Aiello AE, Caspi A, Kothari M, Liu H, Moffitt TE, Muennig PA, Ryan CP, Sugden K, Belsky DW. Educational Mobility, Pace of Aging, and Lifespan Among Participants in the Framingham Heart Study. *JAMA Netw Open*. 2024; 7:e240655.  
<https://doi.org/10.1001/jamanetworkopen.2024.0655>  
PMID:38427354
28. Blackburn EH, Epel ES, Lin J. Human telomere biology: A contributory and interactive factor in aging, disease risks, and protection. *Science*. 2015; 350:1193–8.  
<https://doi.org/10.1126/science.aab3389>  
PMID:26785477
29. Epel ES, Blackburn EH, Lin J, Dhabhar FS, Adler NE, Morrow JD, Cawthon RM. Accelerated telomere shortening in response to life stress. *Proc Natl Acad Sci USA*. 2004; 101:17312–5.  
<https://doi.org/10.1073/pnas.0407162101>  
PMID:15574496
30. Schneider CV, Schneider KM, Teumer A, Rudolph KL, Hartmann D, Rader DJ, Strnad P. Association of Telomere Length With Risk of Disease and Mortality. *JAMA Intern Med*. 2022; 182:291–300.  
<https://doi.org/10.1001/jamainternmed.2021.7804>  
PMID:35040871
31. Rode L, Nordestgaard BG, Bojesen SE. Peripheral blood leukocyte telomere length and mortality among 64,637 individuals from the general population. *J Natl Cancer Inst*. 2015; 107:djv074.  
<https://doi.org/10.1093/jnci/djv074> PMID:25862531
32. Needham BL, Salerno S, Roberts E, Boss J, Allgood KL, Mukherjee B. Do black/white differences in telomere length depend on socioeconomic status? *Biodemography Soc Biol*. 2019; 65:287–312.  
<https://doi.org/10.1080/19485565.2020.1765734>  
PMID:33243026
33. Rewak M, Buka S, Prescott J, De Vivo I, Loucks EB, Kawachi I, Non AL, Kubzansky LD. Race-related health disparities and biological aging: does rate of telomere shortening differ across blacks and whites? *Biol Psychol*. 2014; 99:92–9.  
<https://doi.org/10.1016/j.biopsycho.2014.03.007>  
PMID:24686071
34. Shen H, Gladish N, Cardenas A, Needham BL, Rehkopf DH. Social support and epigenetic aging at the intersections of race, ethnicity, and gender: findings from NHANES 1999-2002. *SSM Popul Health*. 2025; 33:101892.  
<https://doi.org/10.1016/j.ssmph.2025.101892>  
PMID:41458453
35. Laine JE, Baltar VT, Stringhini S, Gandini M, Chadeau-Hyam M, Kivimaki M, Severi G, Perduca V, Hodge AM, Dugué PA, Giles GG, Milne RL, Barros H, et al., and LIFEPATH Consortium. Reducing socioeconomic inequalities in all-cause mortality: a counterfactual mediation approach. *Int J Epidemiol*. 2020; 49:497–510.  
<https://doi.org/10.1093/ije/dyz248> PMID:31855265
36. Lu J, Wu C, Zhang X, Yang Y, Cui J, Xu W, Song L, Yang H, He W, Zhang Y, Li J, Li X. Educational inequalities in mortality and their mediators among generations across four decades: nationwide, population based, prospective cohort study based on the ChinaHEART project. *BMJ*. 2023; 382:e073749.  
<https://doi.org/10.1136/bmj-2022-073749>  
PMID:37468160
37. Ross S, Armas Rojas N, Sawatzky J, Varona-Pérez P, Burrett JA, Calderón Martínez M, Lorenzo-Vázquez E, Bess Constantén S, Sherliker P, Morales Rigau JM, Hernández López OJ, Martínez Morales MÁ, Alonso Alomá I, et al. Educational inequalities and premature mortality: the Cuba Prospective Study. *Lancet Public Health*. 2022; 7:e923–31.  
[https://doi.org/10.1016/S2468-2667\(22\)00237-7](https://doi.org/10.1016/S2468-2667(22)00237-7)  
PMID:36334608
38. Zhu Y, Llamosas-Falcón L, Kerr WC, Rehm J, Probst C. Behavioral risk factors and socioeconomic inequalities in ischemic heart disease mortality in the United

- States: A causal mediation analysis using record linkage data. *PLoS Med.* 2024; 21:e1004455.  
<https://doi.org/10.1371/journal.pmed.1004455>  
PMID:[39288102](https://pubmed.ncbi.nlm.nih.gov/39288102/)
39. Cai L, Kalb G. Health status and labour force participation: evidence from Australia. *Health Econ.* 2006; 15:241–61.  
<https://doi.org/10.1002/hec.1053> PMID:[16229055](https://pubmed.ncbi.nlm.nih.gov/16229055/)
40. Bassuk SS, Berkman LF, Amick BC 3r. Socioeconomic status and mortality among the elderly: findings from four US communities. *Am J Epidemiol.* 2002; 155:520–33.  
<https://doi.org/10.1093/aje/155.6.520>  
PMID:[11882526](https://pubmed.ncbi.nlm.nih.gov/11882526/)
41. Khodasevich D, Gladish N, Daredia S, Bozack AK, Shen H, Nwanaji-Enwerem JC, Needham BL, Rehkopf DH, Cardenas A. Influence of race, ethnicity, and sex on the performance of epigenetic predictors of phenotypic traits. *Clin Epigenetics.* 2025; 17:59.  
<https://doi.org/10.1186/s13148-025-01864-6>  
PMID:[40205465](https://pubmed.ncbi.nlm.nih.gov/40205465/)
42. Schomaker M, Heumann C. Bootstrap inference when using multiple imputation. *Stat Med.* 2018; 37:2252–66.  
<https://doi.org/10.1002/sim.7654> PMID:[29682776](https://pubmed.ncbi.nlm.nih.gov/29682776/)
43. Wahl S, Boulesteix AL, Zierer A, Thorand B, van de Wiel MA. Assessment of predictive performance in incomplete data by combining internal validation and multiple imputation. *BMC Med Res Methodol.* 2016; 16:144.  
<https://doi.org/10.1186/s12874-016-0239-7>  
PMID:[27782817](https://pubmed.ncbi.nlm.nih.gov/27782817/)
44. Aune D, Sen A, Prasad M, Norat T, Janszky I, Tonstad S, Romundstad P, Vatten LJ. BMI and all cause mortality: systematic review and non-linear dose-response meta-analysis of 230 cohort studies with 3.74 million deaths among 30.3 million participants. *BMJ.* 2016; 353:i2156.  
<https://doi.org/10.1136/bmj.i2156> PMID:[27146380](https://pubmed.ncbi.nlm.nih.gov/27146380/)
45. Centers for Disease Control and Prevention (CDC). NHANES 1999-2002 DNA Methylation Array and Epigenetic Biomarkers. 2024. Available from:  
<https://www.cdc.gov/nchs/nhanes/dnam/>
46. Seeman T, Merkin SS, Crimmins E, Koretz B, Charette S, Karlamangla A. Education, income and ethnic differences in cumulative biological risk profiles in a national sample of US adults: NHANES III (1988-1994). *Soc Sci Med.* 2008; 66:72–87.  
<https://doi.org/10.1016/j.socscimed.2007.08.027>  
PMID:[17920177](https://pubmed.ncbi.nlm.nih.gov/17920177/)
47. Martins D, Tareen N, Zadshir A, Pan D, Vargas R, Nissenon A, Norris K. The association of poverty with the prevalence of albuminuria: data from the Third National Health and Nutrition Examination Survey (NHANES III). *Am J Kidney Dis.* 2006; 47:965–71.  
<https://doi.org/10.1053/j.ajkd.2006.02.179>  
PMID:[16731291](https://pubmed.ncbi.nlm.nih.gov/16731291/)
48. Rehkopf DH, Berkman LF, Coull B, Krieger N. The non-linear risk of mortality by income level in a healthy population: US National Health and Nutrition Examination Survey mortality follow-up cohort, 1988-2001. *BMC Public Health.* 2008; 8:383.  
<https://doi.org/10.1186/1471-2458-8-383>  
PMID:[19000311](https://pubmed.ncbi.nlm.nih.gov/19000311/)
49. Hannum G, Guinney J, Zhao L, Zhang L, Hughes G, Sada S, Klotzle B, Bibikova M, Fan JB, Gao Y, Deconde R, Chen M, Rajapakse I, et al. Genome-wide methylation profiles reveal quantitative views of human aging rates. *Mol Cell.* 2013; 49:359–67.  
<https://doi.org/10.1016/j.molcel.2012.10.016>  
PMID:[23177740](https://pubmed.ncbi.nlm.nih.gov/23177740/)
50. Horvath S. DNA methylation age of human tissues and cell types. *Genome Biol.* 2013; 14:R115.  
<https://doi.org/10.1186/gb-2013-14-10-r115>  
PMID:[24138928](https://pubmed.ncbi.nlm.nih.gov/24138928/)
51. Weidner CI, Lin Q, Koch CM, Eisele L, Beier F, Ziegler P, Bauerschlag DO, Jöckel KH, Erbel R, Mühleisen TW, Zenke M, Brümmendorf TH, Wagner W. Aging of blood can be tracked by DNA methylation changes at just three CpG sites. *Genome Biol.* 2014; 15:R24.  
<https://doi.org/10.1186/gb-2014-15-2-r24>  
PMID:[24490752](https://pubmed.ncbi.nlm.nih.gov/24490752/)
52. Lin Q, Weidner CI, Costa IG, Marioni RE, Ferreira MR, Deary IJ, Wagner W. DNA methylation levels at individual age-associated CpG sites can be indicative for life expectancy. *Aging (Albany NY).* 2016; 8:394–401.  
<https://doi.org/10.18632/aging.100908>  
PMID:[26928272](https://pubmed.ncbi.nlm.nih.gov/26928272/)
53. Vidal-Bralo L, Lopez-Golan Y, Gonzalez A. Simplified Assay for Epigenetic Age Estimation in Whole Blood of Adults. *Front Genet.* 2016; 8:51.  
<https://doi.org/10.3389/fgene.2016.00126>  
PMID:[27471517](https://pubmed.ncbi.nlm.nih.gov/27471517/)
54. Horvath S, Oshima J, Martin GM, Lu AT, Quach A, Cohen H, Felton S, Matsuyama M, Lowe D, Kabacik S, Wilson JG, Reiner AP, Maierhofer A, et al. Epigenetic clock for skin and blood cells applied to Hutchinson Gilford Progeria Syndrome and ex vivo studies. *Aging (Albany NY).* 2018; 10:1758–75.  
<https://doi.org/10.18632/aging.101508>  
PMID:[30048243](https://pubmed.ncbi.nlm.nih.gov/30048243/)
55. Zhang Q, Vallerga CL, Walker RM, Lin T, Henders AK, Montgomery GW, He J, Fan D, Fowdar J, Kennedy M,

- Pitcher T, Pearson J, Halliday G, et al. Improved precision of epigenetic clock estimates across tissues and its implication for biological ageing. *Genome Med.* 2019; 11:54.  
<https://doi.org/10.1186/s13073-019-0667-1>  
PMID:[31443728](https://pubmed.ncbi.nlm.nih.gov/31443728/)
56. Levine ME, Lu AT, Quach A, Chen BH, Assimes TL, Bandinelli S, Hou L, Baccarelli AA, Stewart JD, Li Y, Whitsel EA, Wilson JG, Reiner AP, et al. An epigenetic biomarker of aging for lifespan and healthspan. *Aging (Albany NY).* 2018; 10:573–91.  
<https://doi.org/10.18632/aging.101414>  
PMID:[29676998](https://pubmed.ncbi.nlm.nih.gov/29676998/)
57. Lu AT, Quach A, Wilson JG, Reiner AP, Aviv A, Raj K, Hou L, Baccarelli AA, Li Y, Stewart JD, Whitsel EA, Assimes TL, Ferrucci L, Horvath S. DNA methylation GrimAge strongly predicts lifespan and healthspan. *Aging (Albany NY).* 2019; 11:303–27.  
<https://doi.org/10.18632/aging.101684>  
PMID:[30669119](https://pubmed.ncbi.nlm.nih.gov/30669119/)
58. Lu AT, Binder AM, Zhang J, Yan Q, Reiner AP, Cox SR, Corley J, Harris SE, Kuo PL, Moore AZ, Bandinelli S, Stewart JD, Wang C, et al. DNA methylation GrimAge version 2. *Aging (Albany NY).* 2022; 14:9484–549.  
<https://doi.org/10.18632/aging.204434>  
PMID:[36516495](https://pubmed.ncbi.nlm.nih.gov/36516495/)
59. Belsky DW, Caspi A, Arseneault L, Baccarelli A, Corcoran DL, Gao X, Hannon E, Harrington HL, Rasmussen LJ, Houts R, Huffman K, Kraus WE, Kwon D, et al. Quantification of the pace of biological aging in humans through a blood test, the DunedinPoAm DNA methylation algorithm. *Elife.* 2020; 9:e54870.  
<https://doi.org/10.7554/elife.54870>  
PMID:[32367804](https://pubmed.ncbi.nlm.nih.gov/32367804/)
60. Yang Z, Wong A, Kuh D, Paul DS, Rakyen VK, Leslie RD, Zheng SC, Widschwendter M, Beck S, Teschendorff AE. Correlation of an epigenetic mitotic clock with cancer risk. *Genome Biol.* 2016; 17:205.  
<https://doi.org/10.1186/s13059-016-1064-3>  
PMID:[27716309](https://pubmed.ncbi.nlm.nih.gov/27716309/)
61. Lu AT, Seeboth A, Tsai PC, Sun D, Quach A, Reiner AP, Kooperberg C, Ferrucci L, Hou L, Baccarelli AA, Li Y, Harris SE, Corley J, et al. DNA methylation-based estimator of telomere length. *Aging (Albany NY).* 2019; 11:5895–923.  
<https://doi.org/10.18632/aging.102173>  
PMID:[31422385](https://pubmed.ncbi.nlm.nih.gov/31422385/)
62. Krebs-Smith SM, Pannucci TE, Subar AF, Kirkpatrick SI, Lerman JL, Tooze JA, Wilson MM, Reedy J. Update of the Healthy Eating Index: HEI-2015. *J Acad Nutr Diet.* 2018; 118:1591–602.  
<https://doi.org/10.1016/j.jand.2018.05.021>  
PMID:[30146071](https://pubmed.ncbi.nlm.nih.gov/30146071/)
63. Ainsworth BE, Haskell WL, Whitt MC, Irwin ML, Swartz AM, Strath SJ, O'Brien WL, Bassett DR Jr, Schmitz KH, Emplaincourt PO, Jacobs DR Jr, Leon AS. Compendium of physical activities: an update of activity codes and MET intensities. *Med Sci Sports Exerc.* 2000; 32:S498–504.  
<https://doi.org/10.1097/00005768-200009001-00009>  
PMID:[10993420](https://pubmed.ncbi.nlm.nih.gov/10993420/)
64. Sathiakumar N, Delzell E, Abdalla O. Using the National Death Index to obtain underlying cause of death codes. *J Occup Environ Med.* 1998; 40:808–13.  
<https://doi.org/10.1097/00043764-199809000-00010>  
PMID:[9777565](https://pubmed.ncbi.nlm.nih.gov/9777565/)
65. Stekhoven DJ, Bühlmann P. MissForest--non-parametric missing value imputation for mixed-type data. *Bioinformatics.* 2012; 28:112–8.  
<https://doi.org/10.1093/bioinformatics/btr597>  
PMID:[22039212](https://pubmed.ncbi.nlm.nih.gov/22039212/)
66. Waljee AK, Mukherjee A, Singal AG, Zhang Y, Warren J, Balis U, Marrero J, Zhu J, Higgins PD. Comparison of imputation methods for missing laboratory data in medicine. *BMJ Open.* 2013; 3:e002847.  
<https://doi.org/10.1136/bmjopen-2013-002847>  
PMID:[23906948](https://pubmed.ncbi.nlm.nih.gov/23906948/)
67. Tingley D, Yamamoto T, Hirose K, Keele L, Imai K, Yamamoto MT. Package 'mediation.' *Comput Softw Man.* 2019:175–84.  
<https://cran.r-project.org/web/packages/mediation/index.html>

## **SUPPLEMENTARY MATERIALS**

### **Supplementary Appendix**

Please browse Full Text version to see the data of Supplementary Appendix.

## Supplementary Figure

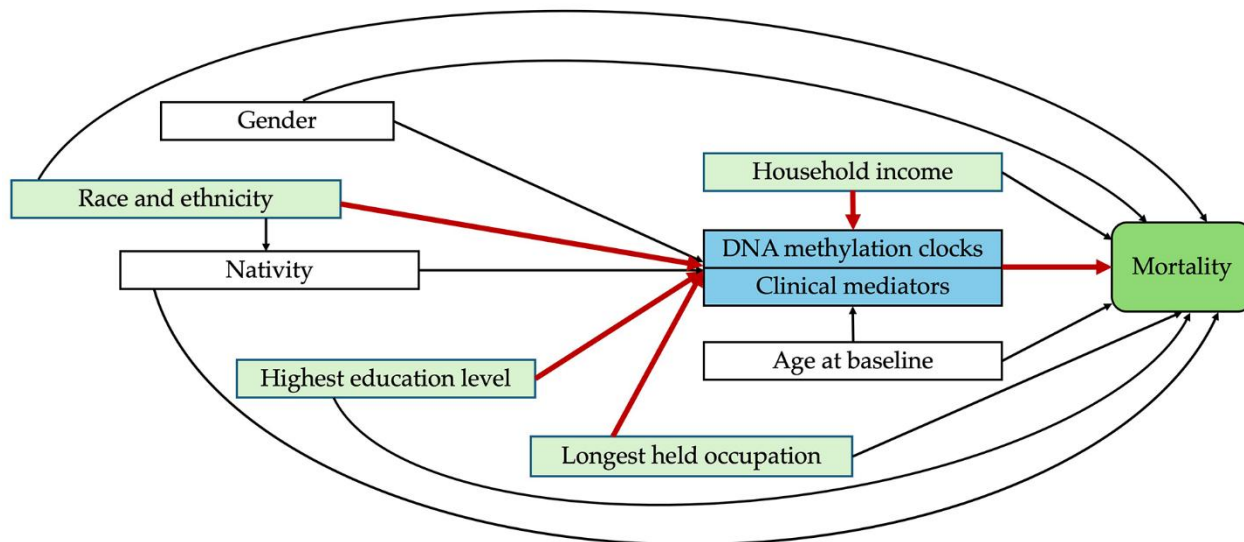

**Supplementary Figure 1. Directed acyclic graph (DAG) illustrating the variables included in the study.** Red arrows indicate the primary pathways examined in the analysis. Light green boxes represent the main exposures, and the dark green box represents the main outcome. Blue boxes denote mediators, while white boxes represent covariates adjusted for in the models.

## Supplementary Tables

Please browse Full Text version to see the data of Supplementary Tables 1, 6, 10, 14, 21, 22, 29, 30, 31, 35, 39, 40.

**Supplementary Table 1. Survival analysis for socioeconomic positions on all-cause mortality, controlled by gender, age, age2, and nativity, NHANES 1999-2002 (n=2,402). Bold indicates statistical significance (p-value<0.05).**

**Supplementary Table 2. Survival analysis for DNA methylation clocks and clinical biomarkers on all-cause mortality, controlled by gender, age, age2, and nativity, NHANES 1999-2002 (n=2,402). Bold indicates statistical significance (p-value<0.05).**

|                                                 | All-cause mortality |                    | Cardiovascular-specific mortality |              |              | Cancer-specific mortality |              |              |
|-------------------------------------------------|---------------------|--------------------|-----------------------------------|--------------|--------------|---------------------------|--------------|--------------|
|                                                 | HR                  | (95% CI)           | HR                                | (95% CI)     |              | HR                        | (95% CI)     |              |
| <b>Chronological age clocks</b>                 |                     |                    |                                   |              |              |                           |              |              |
| Hannum                                          | <b>1.04</b>         | <b>(1.02 1.05)</b> | 1.01                              | (0.97        | 1.05)        | <b>1.05</b>               | <b>(1.02</b> | <b>1.07)</b> |
| Hovarth                                         | <b>1.03</b>         | <b>(1.01 1.04)</b> | 1.00                              | (0.98        | 1.03)        | <b>1.04</b>               | <b>(1.02</b> | <b>1.07)</b> |
| Weidner                                         | 1.01                | (1.00 1.02)        | 1.00                              | (0.98        | 1.02)        | 1.01                      | (0.99        | 1.03)        |
| Lin                                             | <b>1.01</b>         | <b>(1.00 1.02)</b> | 1.00                              | (0.98        | 1.02)        | 1.01                      | (0.99        | 1.03)        |
| Vidal-Bralo                                     | <b>1.02</b>         | <b>(1.01 1.04)</b> | 1.00                              | (0.97        | 1.04)        | <b>1.04</b>               | <b>(1.02</b> | <b>1.07)</b> |
| SkinBlood                                       | 1.02                | (1.00 1.04)        | 1.01                              | (0.97        | 1.06)        | 1.01                      | (0.98        | 1.04)        |
| Zhang                                           | <b>1.06</b>         | <b>(1.01 1.11)</b> | 1.03                              | (0.93        | 1.14)        | 1.02                      | (0.95        | 1.09)        |
| <b>Physiological functioning clocks</b>         |                     |                    |                                   |              |              |                           |              |              |
| PhenoAge                                        | <b>1.04</b>         | <b>(1.03 1.05)</b> | 0.99                              | (0.96        | 1.02)        | <b>1.04</b>               | <b>(1.01</b> | <b>1.07)</b> |
| GrimAge                                         | <b>1.11</b>         | <b>(1.09 1.13)</b> | <b>1.10</b>                       | <b>(1.06</b> | <b>1.14)</b> | <b>1.12</b>               | <b>(1.07</b> | <b>1.16)</b> |
| GrimAge2                                        | <b>1.10</b>         | <b>(1.09 1.12)</b> | <b>1.09</b>                       | <b>(1.05</b> | <b>1.13)</b> | <b>1.10</b>               | <b>(1.06</b> | <b>1.14)</b> |
| <b>Pace of aging clock</b>                      |                     |                    |                                   |              |              |                           |              |              |
| DunedinPoAm                                     | <b>43.7</b>         | <b>(16.9 113)</b>  | <b>17.9</b>                       | <b>(2.37</b> | <b>136)</b>  | <b>30.1</b>               | <b>(5.52</b> | <b>164)</b>  |
| <b>Clocks trained on other aging biomarkers</b> |                     |                    |                                   |              |              |                           |              |              |
| Yang                                            | 21.6                | (0.23 2.03E+03)    | 120                               | (0.00        | 2.61E+08)    | 1.44                      | (0.00        | 1.14E+04)    |
| Telomere                                        | 0.39                | (0.29 0.51)        | 0.69                              | (0.28        | 1.67)        | 0.34                      | (0.18        | 0.66)        |
| <b>Behavioral/Lifestyle measures</b>            |                     |                    |                                   |              |              |                           |              |              |
| Sedentary behavior                              | <b>1.71</b>         | <b>(1.45 2.01)</b> | <b>2.43</b>                       | <b>(1.67</b> | <b>3.52)</b> | 1.31                      | (0.85        | 2.03)        |
| Healthy eating index                            | <b>0.99</b>         | <b>(0.98 1.00)</b> | 1.00                              | (0.99        | 1.02)        | <b>0.97</b>               | <b>(0.96</b> | <b>0.99)</b> |
| Smoking pack years                              | <b>1.01</b>         | <b>(1.01 1.01)</b> | <b>1.01</b>                       | <b>(1.00</b> | <b>1.01)</b> | <b>1.01</b>               | <b>(1.01</b> | <b>1.02)</b> |
| Alcohol drinker                                 | <b>0.75</b>         | <b>(0.63 0.88)</b> | 0.60                              | (0.38        | 0.94)        | 1.19                      | (0.78        | 1.83)        |
| <b>Anthropometric measures</b>                  |                     |                    |                                   |              |              |                           |              |              |
| Waist to thigh ratio                            | <b>3.54</b>         | <b>(2.18 5.76)</b> | <b>4.73</b>                       | <b>(1.26</b> | <b>17.8)</b> | 1.79                      | (0.60        | 5.37)        |
| BMI                                             | 1.01                | (0.99 1.03)        | 1.00                              | (0.95        | 1.07)        | 1.00                      | (0.98        | 1.03)        |
| <b>Clinical used blood Biomarkers</b>           |                     |                    |                                   |              |              |                           |              |              |
| Total cholesterol                               | 1.01                | (0.94 1.08)        | 0.97                              | (0.75        | 1.25)        | 1.12                      | (0.93        | 1.34)        |
| HDL                                             | 1.00                | (0.99 1.00)        | 1.00                              | (0.99        | 1.02)        | 1.00                      | (0.99        | 1.01)        |
| LDL                                             | 1.00                | (1.00 1.00)        | 1.00                              | (0.99        | 1.00)        | 1.00                      | (1.00        | 1.01)        |
| Glucose                                         | <b>1.00</b>         | <b>(1.00 1.01)</b> | <b>1.01</b>                       | <b>(1.00</b> | <b>1.01)</b> | 1.00                      | (0.99        | 1.00)        |
| C-reactive protein                              | <b>1.12</b>         | <b>(1.06 1.17)</b> | 1.04                              | (0.93        | 1.17)        | <b>1.09</b>               | <b>(1.01</b> | <b>1.18)</b> |

**Supplementary Table 3. Average mediated proportions for DNA methylation and clinical mediators on the relationship between race and ethnicity and all-cause mortality, NHANES 1999-2002 (n=2,402). Bold indicates statistical significance (p-value<0.05), and bold with two asterisks indicates significance passed Bonferroni adjustment (p-value<0.0021).**

|                                                 | Model 1. Black (N= 516)<br>vs. White (N= 943) |                        | Model 2. Hispanic (N=860)<br>vs. White (N= 943) |                       | Model 3. Other races (N=83)<br>vs. White (N= 943) |                  |
|-------------------------------------------------|-----------------------------------------------|------------------------|-------------------------------------------------|-----------------------|---------------------------------------------------|------------------|
|                                                 | Average mediated proportion                   | (95% CI)               | Average mediated proportion                     | (95% CI)              | Average mediated proportion                       | (95% CI)         |
| <b>Chronological age clocks</b>                 |                                               |                        |                                                 |                       |                                                   |                  |
| Hannum                                          | <b>-19.1%**</b>                               | <b>(-37.8%- 10.5%)</b> | 5.7%                                            | (-4.9% 22.4%)         | 4.5%                                              | (-100.1% 99.9%)  |
| Hovarth                                         | <b>-5.2%**</b>                                | <b>(-14.6%- 0.7%)</b>  | -5.0%                                           | (-28.6% 1.1%)         | -1.3%                                             | (-93.6% 56.7%)   |
| Weidner                                         | <b>-2.5%**</b>                                | <b>(-8.2%- 0.3%)</b>   | -3.7%                                           | (-16.4% 0.5%)         | -4.9%                                             | (-98.1% 82.1%)   |
| Lin                                             | -2.9%                                         | (-10.6% 0.3%)          | -3.4%                                           | (-18.0% 1.6%)         | -3.8%                                             | (-62.5% 73.0%)   |
| Vidal-Bralo                                     | <b>-14.6%**</b>                               | <b>(-35.9%- 4.9%)</b>  | <b>-10.5%**</b>                                 | <b>(-43.9%- 2.3%)</b> | -13.5%                                            | (-251.5% 159.5%) |
| SkinBlood                                       | <b>-4.9%**</b>                                | <b>(-15.5%- 0.5%)</b>  | 0.1%                                            | (-5.2% 4.3%)          | 1.0%                                              | (-38.1% 47.3%)   |
| Zhang                                           | <b>-9.9%**</b>                                | <b>(-27.0%- 2.8%)</b>  | -1.2%                                           | (-8.3% 2.3%)          | -2.4%                                             | (-59.4% 50.6%)   |
| <b>Physiological functioning clocks</b>         |                                               |                        |                                                 |                       |                                                   |                  |
| PhenoAge                                        | -6.8%                                         | (-22.8% 0.6%)          | 8.9%                                            | (-1.9% 37.8%)         | 5.7%                                              | (-119.3% 161.6%) |
| GrimAge                                         | <b>34.4%**</b>                                | <b>(18.7% 66.8%)</b>   | 15.3%                                           | (-9.8% 53.8%)         | 12.0%                                             | (-193.5% 234.7%) |
| GrimAge2                                        | <b>46.0%**</b>                                | <b>(26.6% 88.7%)</b>   | <b>39.3%**</b>                                  | <b>(18.2% 100.9%)</b> | 24.8%                                             | (-206.7% 288.7%) |
| <b>Pace of aging clock</b>                      |                                               |                        |                                                 |                       |                                                   |                  |
| DunedinPoAm                                     | <b>23.6%**</b>                                | <b>(10.0% 48.9%)</b>   | <b>28.3%**</b>                                  | <b>(12.6% 70.4%)</b>  | 27.2%                                             | (-211.4% 340.7%) |
| <b>Clocks trained on other aging biomarkers</b> |                                               |                        |                                                 |                       |                                                   |                  |
| Yang                                            | 7.4%                                          | (-6.8% 20.9%)          | 3.6%                                            | (-10.9% 21.1%)        | 1.3%                                              | (-98.4% 124.6%)  |
| Telomere                                        | <b>-44.4%**</b>                               | <b>(-79.1%- 27.2%)</b> | 2.8%                                            | (-21.6% 20.4%)        | 9.1%                                              | (-177.4% 157.2%) |
| <b>Behavioral/Lifestyle measures</b>            |                                               |                        |                                                 |                       |                                                   |                  |
| Sedentary behavior                              | <b>27.8%**</b>                                | <b>(13.4% 54.0%)</b>   | <b>23.4%**</b>                                  | <b>(6.7% 63.6%)</b>   | 18.5%                                             | (-217.7% 298.3%) |
| Healthy eating index                            | <b>6.9%**</b>                                 | <b>(0.6% 19.6%)</b>    | 2.9%                                            | (-2.8% 15.3%)         | 0.0%                                              | (-43.2% 62.5%)   |
| Smoking pack years                              | <b>-15.4%**</b>                               | <b>(-34.8%- 6.9%)</b>  | <b>-14.1%**</b>                                 | <b>(-37.1%- 4.6%)</b> | -9.1%                                             | (-125.4% 170.8%) |
| Alcohol drinker                                 | <b>11.9%**</b>                                | <b>(4.6% 25.7%)</b>    | <b>8.2%**</b>                                   | <b>(0.3% 27.8%)</b>   | 19.6%                                             | (-309.1% 358.3%) |
| <b>Anthropometric measures</b>                  |                                               |                        |                                                 |                       |                                                   |                  |
| Waist to thigh ratio                            | <b>-25.8%**</b>                               | <b>(-54.2%- 12.6%)</b> | <b>15.9%**</b>                                  | <b>(4.7% 46.3%)</b>   | 11.1%                                             | (-150.4% 251.1%) |
| BMI                                             | 2.3%                                          | (-6.6% 15.3%)          | 0.3%                                            | (-8.3% 13.5%)         | -0.1%                                             | (-26.1% 27.6%)   |
| <b>Clinical used blood Biomarkers</b>           |                                               |                        |                                                 |                       |                                                   |                  |
| Total cholesterol                               | -0.5%                                         | (-4.7% 1.4%)           | 0.0%                                            | (-4.1% 3.7%)          | -0.2%                                             | (-27.5% 21.8%)   |
| HDL                                             | -0.8%                                         | (-7.7% 3.1%)           | 6.2%                                            | (-3.2% 19.6%)         | 1.6%                                              | (-46.2% 47.4%)   |
| LDL                                             | 0.0%                                          | (-2.6% 1.5%)           | 0.0%                                            | (-3.7% 3.8%)          | 0.0%                                              | (-17.3% 16.4%)   |
| Glucose                                         | <b>8.1%**</b>                                 | <b>(2.2% 19.0%)</b>    | <b>5.5%**</b>                                   | <b>(0.7% 18.2%)</b>   | 7.4%                                              | (-82.9% 127.0%)  |
| C-reactive protein                              | <b>9.5%**</b>                                 | <b>(3.2% 24.3%)</b>    | 1.7%                                            | (-2.2% 7.7%)          | -0.8%                                             | (-37.7% 35.0%)   |

**Supplementary Table 4. Average mediated proportions for DNA methylation and clinical mediators on the relationship between education attainment and all-cause mortality, NHANES 1999-2002 (n=2,402). Bold indicates statistical significance (p-value<0.05), and bold with two asterisks indicates significance passed Bonferroni adjustment (p-value<0.0021).**

|                                                 | Model 1. Less than high school<br>(N=1,096) vs. College degree or<br>higher (N= 370) |                      | Model 2. High school<br>graduate/GED (N=496)<br>vs. College degree or higher<br>(N= 370) |                     | Model 3. Some college or associates<br>degree (N=440)<br>vs. College degree or higher<br>(N= 370) |                       |
|-------------------------------------------------|--------------------------------------------------------------------------------------|----------------------|------------------------------------------------------------------------------------------|---------------------|---------------------------------------------------------------------------------------------------|-----------------------|
|                                                 | Average<br>mediated<br>proportion                                                    | (95% CI)             | Average mediated<br>proportion                                                           | (95% CI)            | Average mediated<br>proportion                                                                    | (95% CI)              |
| <b>Chronological age clocks</b>                 |                                                                                      |                      |                                                                                          |                     |                                                                                                   |                       |
| Hannum                                          | 1.6%                                                                                 | (-0.0% 4.5%)         | <b>4.4%</b>                                                                              | <b>(0.3% 13.4%)</b> | 0.5%                                                                                              | (-6.9% 7.7%)          |
| Hovarth                                         | -0.1%                                                                                | (-1.7% 1.3%)         | -1.7%                                                                                    | (-8.9% 1.3%)        | <b>-4.1%</b>                                                                                      | <b>(-14.0%- 0.2%)</b> |
| Weidner                                         | -0.3%                                                                                | (-3.1% 1.3%)         | 0.1%                                                                                     | (-3.0% 3.7%)        | -0.9%                                                                                             | (-7.8% 1.6%)          |
| Lin                                             | -0.2%                                                                                | (-2.1% 1.2%)         | -1.2%                                                                                    | (-5.5% 1.0%)        | -0.5%                                                                                             | (-5.4% 3.1%)          |
| Vidal-Bralo                                     | -0.7%                                                                                | (-3.4% 0.5%)         | -0.3%                                                                                    | (-5.0% 1.6%)        | -0.7%                                                                                             | (-5.8% 2.6%)          |
| SkinBlood                                       | 0.3%                                                                                 | (-1.0% 2.2%)         | 0.9%                                                                                     | (-1.2% 5.7%)        | 0.0%                                                                                              | (-3.4% 2.7%)          |
| Zhang                                           | 0.5%                                                                                 | (-0.7% 2.6%)         | 0.2%                                                                                     | (-1.7% 3.1%)        | -0.1%                                                                                             | (-5.5% 3.2%)          |
| <b>Physiological functioning clocks</b>         |                                                                                      |                      |                                                                                          |                     |                                                                                                   |                       |
| PhenoAge                                        | <b>6.5%**</b>                                                                        | <b>(2.4% 13.7%)</b>  | 2.9%                                                                                     | (-1.3% 12.2%)       | 3.1%                                                                                              | (-5.0% 12.4%)         |
| GrimAge                                         | <b>23.3%**</b>                                                                       | <b>(14.2% 36.6%)</b> | <b>18.7%**</b>                                                                           | <b>(8.1% 41.7%)</b> | <b>31.8%**</b>                                                                                    | <b>(17.8% 57.5%)</b>  |
| GrimAge2                                        | <b>27.6%**</b>                                                                       | <b>(16.4% 44.9%)</b> | <b>21.4%**</b>                                                                           | <b>(9.9% 48.5%)</b> | <b>32.4%**</b>                                                                                    | <b>(17.2% 64.2%)</b>  |
| <b>Pace of aging clock</b>                      |                                                                                      |                      |                                                                                          |                     |                                                                                                   |                       |
| DunedinPoAm                                     | <b>13.6%**</b>                                                                       | <b>(6.7% 23.6%)</b>  | <b>11.4%**</b>                                                                           | <b>(2.8% 27.6%)</b> | <b>22.0%**</b>                                                                                    | <b>(11.0% 38.0%)</b>  |
| <b>Clocks trained on other aging biomarkers</b> |                                                                                      |                      |                                                                                          |                     |                                                                                                   |                       |
| Yang                                            | -1.0%                                                                                | (-4.4% 1.9%)         | 1.2%                                                                                     | (-1.5% 6.0%)        | 0.3%                                                                                              | (-3.9% 4.5%)          |
| Telomere                                        | <b>5.3%</b>                                                                          | <b>(1.7% 10.1%)</b>  | <b>5.7%**</b>                                                                            | <b>(1.9% 13.1%)</b> | 3.5%                                                                                              | (-0.9% 10.9%)         |
| <b>Behavioral/Lifestyle measures</b>            |                                                                                      |                      |                                                                                          |                     |                                                                                                   |                       |
| Sedentary behavior                              | <b>12.9%**</b>                                                                       | <b>(5.9% 23.2%)</b>  | <b>21.2%</b>                                                                             | <b>(9.4% 44.9%)</b> | 6.2%                                                                                              | (-0.4% 17.7%)         |
| Healthy eating index                            | 1.8%                                                                                 | (-6.5% 14.1%)        | 1.3%                                                                                     | (-15.4% 14.5%)      | 3.7%                                                                                              | (-6.3% 14.6%)         |
| Smoking pack years                              | <b>10.6%**</b>                                                                       | <b>(4.8% 18.3%)</b>  | <b>10.4%</b>                                                                             | <b>(2.6% 27.3%)</b> | <b>16.2%**</b>                                                                                    | <b>(7.3% 35.2%)</b>   |
| Alcohol drinker                                 | 1.9%                                                                                 | (-2.5% 7.1%)         | <b>6.6%</b>                                                                              | <b>(1.0% 19.2%)</b> | 2.4%                                                                                              | (-1.7% 10.6%)         |
| <b>Anthropometric measures</b>                  |                                                                                      |                      |                                                                                          |                     |                                                                                                   |                       |
| Waist to thigh ratio                            | <b>5.6%</b>                                                                          | <b>(1.6% 12.6%)</b>  | 3.0%                                                                                     | (-4.1% 12.0%)       | 4.0%                                                                                              | (-3.4% 14.6%)         |
| BMI                                             | 0.4%                                                                                 | (-3.8% 6.3%)         | 3.0%                                                                                     | (-2.7% 13.0%)       | 4.5%                                                                                              | (-7.5% 23.6%)         |
| <b>Clinical used blood Biomarkers</b>           |                                                                                      |                      |                                                                                          |                     |                                                                                                   |                       |
| Total cholesterol                               | 0.0%                                                                                 | (-1.4% 1.6%)         | -0.4%                                                                                    | (-15.5% 8.9%)       | -3.4%                                                                                             | (-16.2% 2.8%)         |
| HDL                                             | 0.1%                                                                                 | (-5.8% 5.9%)         | 0.3%                                                                                     | (-4.7% 5.4%)        | 0.0%                                                                                              | (-3.9% 3.9%)          |
| LDL                                             | -0.1%                                                                                | (-2.3% 1.2%)         | 0.4%                                                                                     | (-13.7% 11.5%)      | -3.9%                                                                                             | (-15.4% 0.7%)         |
| Glucose                                         | 2.3%                                                                                 | (-0.2% 6.5%)         | 1.3%                                                                                     | (-2.0% 6.4%)        | -1.8%                                                                                             | (-12.1% 3.7%)         |
| C-reactive protein                              | <b>2.0%</b>                                                                          | <b>(0.5% 4.5%)</b>   | 0.6%                                                                                     | (-2.7% 4.4%)        | 0.7%                                                                                              | (-3.7% 5.9%)          |

**Supplementary Table 5. Average mediated proportions for DNA methylation and clinical mediators on the relationship between household income and all-cause mortality, NHANES 1999-2002 (n=2,402). Bold indicates statistical significance (p-value<0.05), and bold with two asterisks indicates significance passed Bonferroni adjustment (p-value<0.0021).**

|                                                 | Model 1. PIR<1 (N=372)<br>vs. PIR 5+ (N= 399) |                      | Model 2. PIR 1-2 (N=707)<br>vs. PIR 5+ (N= 399) |                      | Model 3. PIR 2-5 (N=923)<br>vs. PIR 5+ (N= 399) |                      |
|-------------------------------------------------|-----------------------------------------------|----------------------|-------------------------------------------------|----------------------|-------------------------------------------------|----------------------|
|                                                 | Average mediated<br>proportion                | (95% CI)             | Average mediated<br>proportion                  | (95% CI)             | Average mediated<br>proportion                  | (95% CI)             |
| <b>Chronological age clocks</b>                 |                                               |                      |                                                 |                      |                                                 |                      |
| Hannum                                          | 3.0%                                          | (-0.5% 8.2%)         | 2.6%                                            | (-0.8% 6.5%)         | 0.3%                                            | (-7.1% 6.6%)         |
| Hovarth                                         | -0.1%                                         | (-2.6% 1.6%)         | -0.1%                                           | (-3.7% 2.9%)         | -0.6%                                           | (-5.5% 2.5%)         |
| Weidner                                         | 0.2%                                          | (-1.5% 3.1%)         | 0.5%                                            | (-1.6% 2.9%)         | 0.0%                                            | (-1.8% 1.7%)         |
| Lin                                             | 0.2%                                          | (-1.5% 2.7%)         | -0.7%                                           | (-3.0% 0.6%)         | -1.1%                                           | (-6.0% 1.5%)         |
| Vidal-Bralo                                     | -0.3%                                         | (-3.1% 0.9%)         | 0.6%                                            | (-1.9% 3.4%)         | -0.3%                                           | (-3.6% 1.9%)         |
| SkinBlood                                       | -0.2%                                         | (-3.7% 1.7%)         | 0.0%                                            | (-1.1% 1.2%)         | -1.2%                                           | (-5.1% 1.7%)         |
| Zhang                                           | -0.4%                                         | (-2.9% 1.0%)         | -0.5%                                           | (-2.2% 0.7%)         | -1.0%                                           | (-5.3% 1.1%)         |
| <b>Physiological functioning clocks</b>         |                                               |                      |                                                 |                      |                                                 |                      |
| PhenoAge                                        | <b>5.1%</b>                                   | <b>(0.3% 13.4%)</b>  | <b>8.3%</b>                                     | <b>(2.5% 16.5%)</b>  | 4.0%                                            | (-0.8% 15.3%)        |
| GrimAge                                         | <b>32.1%**</b>                                | <b>(20.1% 50.0%)</b> | <b>24.7%**</b>                                  | <b>(14.5% 41.4%)</b> | <b>22.6%**</b>                                  | <b>(9.6% 53.5%)</b>  |
| GrimAge2                                        | <b>36.6%**</b>                                | <b>(22.2% 57.8%)</b> | <b>29.2%**</b>                                  | <b>(17.4% 50.8%)</b> | <b>24.9%**</b>                                  | <b>(10.6% 59.5%)</b> |
| <b>Pace of aging clock</b>                      |                                               |                      |                                                 |                      |                                                 |                      |
| DunedinPoAm                                     | <b>19.5%**</b>                                | <b>(9.8% 35.7%)</b>  | <b>14.1%**</b>                                  | <b>(6.6% 29.0%)</b>  | <b>15.0%</b>                                    | <b>(4.1% 40.5%)</b>  |
| <b>Clocks trained on other aging biomarkers</b> |                                               |                      |                                                 |                      |                                                 |                      |
| Yang                                            | 0.1%                                          | (-4.4% 5.1%)         | 1.0%                                            | (-1.1% 4.8%)         | 0.0%                                            | (-4.0% 1.9%)         |
| Telomere                                        | 1.8%                                          | (-1.2% 7.5%)         | <b>5.4%**</b>                                   | <b>(1.9% 10.3%)</b>  | <b>3.7%</b>                                     | <b>(0.3% 11.4%)</b>  |
| <b>Behavioral/Lifestyle measures</b>            |                                               |                      |                                                 |                      |                                                 |                      |
| Sedentary behavior                              | <b>21.0%</b>                                  | <b>(5.2% 39.7%)</b>  | <b>12.9%</b>                                    | <b>(4.2% 31.0%)</b>  | <b>14.0%</b>                                    | <b>(1.4% 48.4%)</b>  |
| Healthy eating index                            | 4.0%                                          | (-10.9% 16.8%)       | 1.9%                                            | (-3.7% 9.5%)         | 2.9%                                            | (-3.5% 18.1%)        |
| Smoking pack years                              | <b>11.5%**</b>                                | <b>(5.1% 19.8%)</b>  | <b>10.9%**</b>                                  | <b>(3.6% 27.9%)</b>  | <b>12.7%**</b>                                  | <b>(3.8% 31.0%)</b>  |
| Alcohol drinker                                 | -3.7%                                         | (-17.5% 7.4%)        | 2.1%                                            | (-8.5% 13.6%)        | <b>6.0%</b>                                     | <b>(0.3% 16.6%)</b>  |
| <b>Anthropometric measures</b>                  |                                               |                      |                                                 |                      |                                                 |                      |
| Waist to thigh ratio                            | 5.1%                                          | (-1.1% 12.5%)        | 5.8%                                            | (-1.7% 15.3%)        | 8.1%                                            | (-0.0% 21.3%)        |
| BMI                                             | -0.5%                                         | (-11.2% 8.2%)        | -0.4%                                           | (-11.5% 6.0%)        | 2.6%                                            | (-10.4% 17.1%)       |
| <b>Clinical used blood Biomarkers</b>           |                                               |                      |                                                 |                      |                                                 |                      |
| Total cholesterol                               | 0.0%                                          | (-3.6% 3.0%)         | 0.3%                                            | (-1.3% 3.5%)         | -0.4%                                           | (-5.8% 4.5%)         |
| HDL                                             | -4.0%                                         | (-16.7% 5.2%)        | 0.6%                                            | (-7.1% 7.4%)         | 0.1%                                            | (-6.9% 7.6%)         |
| LDL                                             | -1.7%                                         | (-7.9% 1.9%)         | 0.2%                                            | (-2.0% 3.7%)         | -1.6%                                           | (-9.7% 4.3%)         |
| Glucose                                         | <b>6.2%</b>                                   | <b>(1.1% 14.8%)</b>  | 1.2%                                            | (-2.5% 6.8%)         | 4.5%                                            | (-0.1% 12.9%)        |
| C-reactive protein                              | <b>2.0%</b>                                   | <b>(0.3% 5.1%)</b>   | <b>4.9%</b>                                     | <b>(1.3% 10.0%)</b>  | 2.1%                                            | (-0.3% 8.0%)         |

Supplementary Table 6. Average mediated proportions for DNA methylation and clinical mediators on the relationship between occupation status and all-cause mortality, NHANES 1999-2002 (n=2,402). Bold indicates statistical significance (p-value<0.05), and bold with two asterisks indicates significance passed Bonferroni adjustment (p-value<0.0021).

Supplementary Table 7. Average mediated proportions for DNA methylation and clinical mediators on the relationship between race and ethnicity and cardiovascular-specific mortality, NHANES 1999-2002 (n=2,402). Bold indicates statistical significance (p-value<0.05), and bold with two asterisks indicates significance passed Bonferroni adjustment (p-value<0.0021).

|                                                 | Model 1. Black (N= 516)<br>vs. White (N= 943) |                       | Model 2. Hispanic (N=860)<br>vs. White (N= 943) |                  | Model 3. Other races (N=83)<br>vs. White (N= 943) |                 |
|-------------------------------------------------|-----------------------------------------------|-----------------------|-------------------------------------------------|------------------|---------------------------------------------------|-----------------|
|                                                 | Average mediated proportion                   | (95% CI)              | Average mediated proportion                     | (95% CI)         | Average mediated proportion                       | (95% CI)        |
| <b>Chronological age clocks</b>                 |                                               |                       |                                                 |                  |                                                   |                 |
| Hannum                                          | -3.6%                                         | (-15.4% 14.2%)        | 1.2%                                            | (-74.1% 88.9%)   | -0.1%                                             | (-11.3% 8.8%)   |
| Hovarth                                         | -0.7%                                         | (-5.6% 1.9%)          | 0.1%                                            | (-37.3% 30.2%)   | 0.0%                                              | (-4.8% 4.5%)    |
| Weidner                                         | 0.0%                                          | (-4.9% 6.5%)          | -0.4%                                           | (-77.3% 71.0%)   | -0.3%                                             | (-24.7% 19.3%)  |
| Lin                                             | -0.1%                                         | (-4.7% 4.8%)          | -0.3%                                           | (-59.8% 60.2%)   | -0.1%                                             | (-14.0% 12.6%)  |
| Vidal-Bralo                                     | -2.6%                                         | (-17.9% 11.5%)        | -0.9%                                           | (-153.0% 132.5%) | 0.3%                                              | (-22.6% 16.8%)  |
| SkinBlood                                       | -2.0%                                         | (-9.7% 6.7%)          | 0.1%                                            | (-20.4% 30.9%)   | -0.1%                                             | (-9.2% 7.9%)    |
| Zhang                                           | -4.0%                                         | (-16.8% 7.4%)         | -0.2%                                           | (-24.3% 22.5%)   | 0.3%                                              | (-9.3% 9.8%)    |
| <b>Physiological functioning clocks</b>         |                                               |                       |                                                 |                  |                                                   |                 |
| PhenoAge                                        | 0.5%                                          | (-3.2% 7.3%)          | -1.4%                                           | (-94.0% 86.9%)   | 0.7%                                              | (-18.0% 20.6%)  |
| GrimAge                                         | <b>17.2%**</b>                                | <b>(6.6% 55.5%)</b>   | 3.7%                                            | (-207.4% 199.3%) | -2.9%                                             | (-38.8% 21.0%)  |
| GrimAge2                                        | <b>22.6%**</b>                                | <b>(8.7% 63.4%)</b>   | 15.5%                                           | (-508.3% 538.3%) | -5.7%                                             | (-94.2% 36.5%)  |
| <b>Pace of aging clock</b>                      |                                               |                       |                                                 |                  |                                                   |                 |
| DunedinPoAm                                     | <b>10.1%</b>                                  | <b>(2.0% 42.8%)</b>   | 9.9%                                            | (-410.7% 444.4%) | -5.7%                                             | (-50.2% 12.9%)  |
| <b>Clocks trained on other aging biomarkers</b> |                                               |                       |                                                 |                  |                                                   |                 |
| Yang                                            | 5.9%                                          | (-31.4% 36.2%)        | 4.8%                                            | (-224.1% 287.9%) | -3.8%                                             | (-62.4% 30.8%)  |
| Telomere                                        | -15.5%                                        | (-43.2% 12.9%)        | 0.3%                                            | (-54.5% 68.6%)   | -1.5%                                             | (-32.9% 16.3%)  |
| <b>Behavioral/Lifestyle measures</b>            |                                               |                       |                                                 |                  |                                                   |                 |
| Sedentary behavior                              | <b>25.9%**</b>                                | <b>(11.2% 91.9%)</b>  | 20.4%                                           | (-635.6% 610.1%) | -11.2%                                            | (-122.4% 29.5%) |
| Healthy eating index                            | -2.6%                                         | (-15.0% 2.5%)         | 0.0%                                            | (-49.6% 42.9%)   | 0.0%                                              | (-8.5% 7.0%)    |
| Smoking pack years                              | <b>-5.1%</b>                                  | <b>(-12.5% -0.2%)</b> | -4.8%                                           | (-116.5% 152.5%) | 1.6%                                              | (-11.1% 20.6%)  |
| Alcohol drinker                                 | <b>11.9%</b>                                  | <b>(0.7% 43.2%)</b>   | 5.7%                                            | (-218.4% 219.6%) | -14.7%                                            | (-102.4% 75.8%) |
| <b>Anthropometric measures</b>                  |                                               |                       |                                                 |                  |                                                   |                 |
| Waist to thigh ratio                            | <b>-18.9%</b>                                 | <b>(-66.6% -3.8%)</b> | 10.2%                                           | (-260.1% 343.1%) | -4.1%                                             | (-81.8% 48.0%)  |
| BMI                                             | 1.3%                                          | (-11.6% 32.6%)        | 0.4%                                            | (-116.9% 202.3%) | 0.0%                                              | (-17.2% 14.5%)  |
| <b>Clinical used blood Biomarkers</b>           |                                               |                       |                                                 |                  |                                                   |                 |
| Total cholesterol                               | 0.2%                                          | (-6.3% 5.8%)          | 0.0%                                            | (-31.6% 34.7%)   | 0.1%                                              | (-11.1% 10.8%)  |
| HDL                                             | 1.5%                                          | (-5.9% 10.3%)         | 2.1%                                            | (-245.2% 198.8%) | 0.4%                                              | (-20.6% 23.6%)  |
| LDL                                             | 0.2%                                          | (-2.5% 4.6%)          | -0.1%                                           | (-38.3% 43.6%)   | -0.1%                                             | (-9.9% 7.6%)    |
| Glucose                                         | <b>6.8%</b>                                   | <b>(1.0% 24.0%)</b>   | 5.3%                                            | (-161.3% 119.6%) | -4.0%                                             | (-41.0% 29.2%)  |
| C-reactive protein                              | 0.7%                                          | (-8.8% 7.3%)          | 0.1%                                            | (-11.9% 17.1%)   | 0.0%                                              | (-3.2% 3.4%)    |

**Supplementary Table 8. Average mediated proportions for DNA methylation and clinical mediators on the relationship between education attainment and cardiovascular-specific mortality, NHANES 1999-2002 (n=2,402). Bold indicates statistical significance (p-value<0.05), and bold with two asterisks indicates significance passed Bonferroni adjustment (p-value<0.0021).**

|                                                 | <b>Model 1. Less than high school (N=1,096) vs. College degree or higher (N= 370)</b> |                 |         | <b>Model 2. High school graduate/GED (N=496) vs. College degree or higher (N= 370)</b> |                 |          | <b>Model 3. Some college or associates degree (N=440) vs. College degree or higher (N= 370)</b> |                 |         |
|-------------------------------------------------|---------------------------------------------------------------------------------------|-----------------|---------|----------------------------------------------------------------------------------------|-----------------|----------|-------------------------------------------------------------------------------------------------|-----------------|---------|
|                                                 | <b>Average mediated proportion</b>                                                    | <b>(95% CI)</b> |         | <b>Average mediated proportion</b>                                                     | <b>(95% CI)</b> |          | <b>Average mediated proportion</b>                                                              | <b>(95% CI)</b> |         |
| <b>Chronological age clocks</b>                 |                                                                                       |                 |         |                                                                                        |                 |          |                                                                                                 |                 |         |
| Hannum                                          | -1.7%                                                                                 | (-57.7%         | 82.6%)  | 1.1%                                                                                   | (-76.1%         | 87.7%)   | 0.1%                                                                                            | (-38.7%         | 36.1%)  |
| Hovarth                                         | 0.0%                                                                                  | (-8.2%          | 7.5%)   | 0.1%                                                                                   | (-29.6%         | 31.4%)   | 1.5%                                                                                            | (-46.9%         | 38.3%)  |
| Weidner                                         | -0.7%                                                                                 | (-29.4%         | 35.3%)  | 0.0%                                                                                   | (-64.8%         | 29.6%)   | -0.1%                                                                                           | (-29.3%         | 38.6%)  |
| Lin                                             | 0.0%                                                                                  | (-17.6%         | 7.5%)   | -0.1%                                                                                  | (-28.6%         | 44.2%)   | 0.8%                                                                                            | (-55.9%         | 32.3%)  |
| Vidal-Bralo                                     | -0.1%                                                                                 | (-15.7%         | 14.7%)  | 0.0%                                                                                   | (-41.3%         | 36.6%)   | -0.4%                                                                                           | (-22.4%         | 15.8%)  |
| SkinBlood                                       | -0.6%                                                                                 | (-35.0%         | 12.4%)  | 2.1%                                                                                   | (-144.9%        | 96.5%)   | 0.5%                                                                                            | (-16.5%         | 26.4%)  |
| Zhang                                           | 0.0%                                                                                  | (-8.3%          | 8.8%)   | 0.2%                                                                                   | (-22.0%         | 43.2%)   | 0.7%                                                                                            | (-20.6%         | 23.7%)  |
| <b>Physiological functioning clocks</b>         |                                                                                       |                 |         |                                                                                        |                 |          |                                                                                                 |                 |         |
| PhenoAge                                        | 1.6%                                                                                  | (-36.1%         | 52.0%)  | -0.5%                                                                                  | (-117.6%        | 101.0%)  | -1.7%                                                                                           | (-86.0%         | 81.4%)  |
| GrimAge                                         | 51.0%                                                                                 | (-335.8%        | 531.6%) | 23.8%                                                                                  | (-686.2%        | 733.5%)  | 12.0%                                                                                           | (-168.5%        | 212.3%) |
| GrimAge2                                        | 60.9%                                                                                 | (-255.1%        | 610.7%) | 19.5%                                                                                  | (-440.8%        | 634.5%)  | 15.7%                                                                                           | (-281.5%        | 232.3%) |
| <b>Pace of aging clock</b>                      |                                                                                       |                 |         |                                                                                        |                 |          |                                                                                                 |                 |         |
| DunedinPoAm                                     | 18.7%                                                                                 | (-248.0%        | 269.5%) | 3.7%                                                                                   | (-177.3%        | 194.5%)  | 14.1%                                                                                           | (-220.8%        | 268.1%) |
| <b>Clocks trained on other aging biomarkers</b> |                                                                                       |                 |         |                                                                                        |                 |          |                                                                                                 |                 |         |
| Yang                                            | 6.2%                                                                                  | (-48.1%         | 72.3%)  | -0.6%                                                                                  | (-112.2%        | 115.6%)  | 1.1%                                                                                            | (-42.9%         | 37.1%)  |
| Telomere                                        | 5.8%                                                                                  | (-46.7%         | 50.9%)  | 0.6%                                                                                   | (-130.4%        | 71.3%)   | -0.7%                                                                                           | (-30.8%         | 29.2%)  |
| <b>Behavioral/Lifestyle measures</b>            |                                                                                       |                 |         |                                                                                        |                 |          |                                                                                                 |                 |         |
| Sedentary behavior                              | 28.7%                                                                                 | (-629.4%        | 548.1%) | 53.8%                                                                                  | (-1,118.9%      | 1312.3%) | 13.1%                                                                                           | (-292.9%        | 196.2%) |
| Healthy eating index                            | -14.5%                                                                                | (-153.0%        | 140.7%) | -8.2%                                                                                  | (-330.4%        | 367.9%)  | -3.3%                                                                                           | (-86.7%         | 63.5%)  |
| Smoking pack years                              | 22.7%                                                                                 | (-301.1%        | 272.8%) | 12.0%                                                                                  | (-302.9%        | 408.7%)  | -8.5%                                                                                           | (-99.0%         | 144.2%) |
| Alcohol drinker                                 | 5.3%                                                                                  | (-110.1%        | 139.0%) | 9.8%                                                                                   | (-517.8%        | 332.7%)  | 5.8%                                                                                            | (-87.7%         | 165.8%) |
| <b>Anthropometric measures</b>                  |                                                                                       |                 |         |                                                                                        |                 |          |                                                                                                 |                 |         |
| Waist to thigh ratio                            | 7.4%                                                                                  | (-106.0%        | 105.0%) | 3.1%                                                                                   | (-129.6%        | 133.4%)  | 3.1%                                                                                            | (-55.4%         | 81.2%)  |
| BMI                                             | -2.0%                                                                                 | (-70.5%         | 115.5%) | -2.5%                                                                                  | (-138.6%        | 143.0%)  | 12.0%                                                                                           | (-125.7%        | 188.6%) |
| <b>Clinical used blood Biomarkers</b>           |                                                                                       |                 |         |                                                                                        |                 |          |                                                                                                 |                 |         |
| Total cholesterol                               | 0.1%                                                                                  | (-31.9%         | 41.4%)  | -4.2%                                                                                  | (-174.4%        | 210.4%)  | 2.5%                                                                                            | (-124.7%        | 118.7%) |
| HDL                                             | -4.9%                                                                                 | (-95.7%         | 102.3%) | -0.6%                                                                                  | (-81.2%         | 80.1%)   | 0.6%                                                                                            | (-40.4%         | 42.5%)  |
| LDL                                             | -0.9%                                                                                 | (-75.5%         | 79.9%)  | -0.5%                                                                                  | (-194.1%        | 201.6%)  | -0.2%                                                                                           | (-94.4%         | 107.8%) |
| Glucose                                         | 12.4%                                                                                 | (-218.9%        | 219.7%) | 0.1%                                                                                   | (-62.0%         | 73.4%)   | -0.3%                                                                                           | (-51.9%         | 52.0%)  |
| C-reactive protein                              | 1.0%                                                                                  | (-28.0%         | 35.6%)  | -0.6%                                                                                  | (-51.5%         | 59.1%)   | 0.1%                                                                                            | (-8.8%          | 8.4%)   |

**Supplementary Table 9. Average mediated proportions for DNA methylation and clinical mediators on the relationship between household income and cardiovascular-specific mortality, NHANES 1999-2002 (n=2,402). Bold indicates statistical significance (p-value<0.05), and bold with two asterisks indicates significance passed Bonferroni adjustment (p-value<0.0021).**

|                                                 | Model 1. PIR<1 (N=373)<br>vs. PIR 5+ (N= 399) |                      | Model 2. PIR 1-2 (N=707)<br>vs. PIR 5+ (N= 399) |                 | Model 3. PIR 2-5 (N=923)<br>vs. PIR 5+ (N= 399) |                 |
|-------------------------------------------------|-----------------------------------------------|----------------------|-------------------------------------------------|-----------------|-------------------------------------------------|-----------------|
|                                                 | Average mediated proportion                   | (95% CI)             | Average mediated proportion                     | (95% CI)        | Average mediated proportion                     | (95% CI)        |
| <b>Chronological age clocks</b>                 |                                               |                      |                                                 |                 |                                                 |                 |
| Hannum                                          | 0.5%                                          | (-6.0% 6.5%)         | 0.0%                                            | (-13.2% 7.1%)   | 0.0%                                            | (-22.0% 21.7%)  |
| Hovarth                                         | 0.7%                                          | (-2.9% 6.2%)         | 0.0%                                            | (-5.7% 4.9%)    | -0.1%                                           | (-15.7% 11.7%)  |
| Weidner                                         | 0.0%                                          | (-6.4% 5.1%)         | -0.8%                                           | (-29.3% 9.6%)   | 0.0%                                            | (-14.1% 15.8%)  |
| Lin                                             | -0.2%                                         | (-7.3% 7.9%)         | 0.7%                                            | (-6.1% 11.4%)   | -0.1%                                           | (-19.4% 18.4%)  |
| Vidal-Bralo                                     | -0.1%                                         | (-4.6% 2.6%)         | -0.4%                                           | (-11.4% 5.3%)   | -0.1%                                           | (-29.3% 16.9%)  |
| SkinBlood                                       | 0.2%                                          | (-6.7% 8.3%)         | 0.0%                                            | (-4.9% 6.6%)    | -0.8%                                           | (-37.4% 33.5%)  |
| Zhang                                           | 0.4%                                          | (-2.2% 5.7%)         | 0.2%                                            | (-6.0% 6.5%)    | -1.3%                                           | (-41.5% 21.6%)  |
| <b>Physiological functioning clocks</b>         |                                               |                      |                                                 |                 |                                                 |                 |
| PhenoAge                                        | -3.7%                                         | (-20.1% 2.1%)        | -1.3%                                           | (-30.4% 17.2%)  | -1.1%                                           | (-47.3% 50.9%)  |
| GrimAge                                         | <b>23.4%**</b>                                | <b>(11.2% 49.9%)</b> | 27.3%                                           | (-36.2% 122.2%) | 7.9%                                            | (-152.7%183.1%) |
| GrimAge2                                        | <b>25.7%**</b>                                | <b>(11.2% 61.9%)</b> | 33.1%                                           | (-62.3% 201.6%) | 9.1%                                            | (-289.5%225.5%) |
| <b>Pace of aging clock</b>                      |                                               |                      |                                                 |                 |                                                 |                 |
| DunedinPoAm                                     | 15.7%                                         | (-1.1% 47.1%)        | 14.6%                                           | (-32.5% 98.0%)  | 5.4%                                            | (-223.1%197.6%) |
| <b>Clocks trained on other aging biomarkers</b> |                                               |                      |                                                 |                 |                                                 |                 |
| Yang                                            | 0.3%                                          | (-12.1% 11.5%)       | 1.5%                                            | (-22.2% 38.4%)  | 0.0%                                            | (-55.2% 45.3%)  |
| Telomere                                        | -1.9%                                         | (-21.0% 4.4%)        | -2.9%                                           | (-48.2% 24.3%)  | 1.3%                                            | (-31.5% 55.3%)  |
| <b>Behavioral/Lifestyle measures</b>            |                                               |                      |                                                 |                 |                                                 |                 |
| Sedentary behavior                              | 12.6%                                         | (-33.4% 70.4%)       | 40.5%                                           | (-199.0%301.0%) | 22.1%                                           | (-534.7%390.8%) |
| Healthy eating index                            | 6.7%                                          | (-12.1% 26.4%)       | -9.4%                                           | (-77.8% 13.8%)  | -3.9%                                           | (-71.0% 104.5%) |
| Smoking pack years                              | 3.3%                                          | (-3.5% 13.8%)        | 3.1%                                            | (-21.3% 29.2%)  | 4.7%                                            | (-101.5%149.9%) |
| Alcohol drinker                                 | 8.9%                                          | (-8.4% 38.4%)        | -1.2%                                           | (-67.2% 53.8%)  | 16.7%                                           | (-301.7%310.6%) |
| <b>Anthropometric measures</b>                  |                                               |                      |                                                 |                 |                                                 |                 |
| Waist to thigh ratio                            | 14.9%                                         | (-0.4% 50.4%)        | 11.2%                                           | (-10.5% 68.5%)  | 4.7%                                            | (-206.7%177.7%) |
| BMI                                             | 0.0%                                          | (-15.5% 14.0%)       | -15.3%                                          | (-77.4% 47.2%)  | 22.3%                                           | (-192.0%230.1%) |
| <b>Clinical used blood Biomarkers</b>           |                                               |                      |                                                 |                 |                                                 |                 |
| Total cholesterol                               | -0.1%                                         | (-11.2% 9.9%)        | 1.1%                                            | (-14.0% 27.1%)  | -0.2%                                           | (-94.6% 90.6%)  |
| HDL                                             | 3.8%                                          | (-10.5% 30.8%)       | -3.3%                                           | (-93.2% 41.9%)  | 0.5%                                            | (-98.7% 115.3%) |
| LDL                                             | -2.9%                                         | (-21.4% 8.0%)        | 0.2%                                            | (-26.7% 19.3%)  | -0.5%                                           | (-112.7% 93.4%) |
| Glucose                                         | <b>6.7%</b>                                   | <b>(1.3% 27.6%)</b>  | 1.8%                                            | (-13.5% 31.9%)  | 3.3%                                            | (-96.1% 75.8%)  |
| C-reactive protein                              | 1.7%                                          | (-0.8% 9.8%)         | 1.9%                                            | (-11.0% 17.7%)  | -0.5%                                           | (-22.6% 21.0%)  |

**Supplementary Table 10. Average mediated proportions for DNA methylation and clinical mediators on the relationship between occupation status and cardiovascular-specific mortality, NHANES 1999-2002 (n=2,402). Bold indicates statistical significance (p-value<0.05), and bold with two asterisks indicates significance passed Bonferroni adjustment (p-value<0.0021).**

**Supplementary Table 11. Average mediated proportions for DNA methylation and clinical mediators on the relationship between race and ethnicity and cancer-specific mortality, NHANES 1999-2002 (n=2,402). Bold indicates statistical significance (p-value<0.05), and bold with two asterisks indicates significance passed Bonferroni adjustment (p-value<0.0021).**

|                                                 | <b>Model 1. Black (N= 516)<br/>vs. White (N= 943)</b> |                  | <b>Model 2. Hispanic (N=860)<br/>vs. White (N= 943)</b> |                  | <b>Model 3. Other races (N=83)<br/>vs. White (N= 943)</b> |                  |
|-------------------------------------------------|-------------------------------------------------------|------------------|---------------------------------------------------------|------------------|-----------------------------------------------------------|------------------|
|                                                 | <b>Average mediated<br/>proportion</b>                | <b>(95% CI)</b>  | <b>Average mediated<br/>proportion</b>                  | <b>(95% CI)</b>  | <b>Average mediated<br/>proportion</b>                    | <b>(95% CI)</b>  |
| <b>Chronological age clocks</b>                 |                                                       |                  |                                                         |                  |                                                           |                  |
| Hannum                                          | -30.2%                                                | (-300.1% 141.6%) | 3.8%                                                    | (-127.4% 179.2%) | 0.3%                                                      | (-111.4% 149.8%) |
| Hovarth                                         | -10.9%                                                | (-165.3% 56.1%)  | -2.0%                                                   | (-159.6% 170.6%) | 0.0%                                                      | (-64.9% 64.9%)   |
| Weidner                                         | -2.8%                                                 | (-31.6% 15.9%)   | -0.8%                                                   | (-106.8% 78.3%)  | -1.1%                                                     | (-91.5% 88.0%)   |
| Lin                                             | -3.6%                                                 | (-37.0% 40.7%)   | -0.7%                                                   | (-80.3% 66.1%)   | -0.5%                                                     | (-68.1% 68.3%)   |
| Vidal-Bralo                                     | -28.6%                                                | (-261.0% 197.8%) | -11.2%                                                  | (-395.7% 316.8%) | -4.9%                                                     | (-324.3% 269.6%) |
| SkinBlood                                       | -5.2%                                                 | (-53.5% 47.5%)   | 0.0%                                                    | (-17.9% 17.5%)   | 0.2%                                                      | (-37.5% 38.5%)   |
| Zhang                                           | -7.1%                                                 | (-70.1% 17.6%)   | -0.1%                                                   | (-17.1% 20.4%)   | -0.1%                                                     | (-32.7% 34.1%)   |
| <b>Physiological functioning clocks</b>         |                                                       |                  |                                                         |                  |                                                           |                  |
| PhenoAge                                        | -8.4%                                                 | (-76.0% 84.3%)   | 1.5%                                                    | (-189.7% 128.3%) | 0.6%                                                      | (-158.6% 118.8%) |
| GrimAge                                         | 40.1%                                                 | (-256.6% 455.9%) | 4.4%                                                    | (-272.9% 360.0%) | 2.4%                                                      | (-352.1% 187.8%) |
| GrimAge2                                        | 53.6%                                                 | (-307.1% 765.2%) | 23.4%                                                   | (-593.5% 795.9%) | 7.0%                                                      | (-178.9% 261.1%) |
| <b>Pace of aging clock</b>                      |                                                       |                  |                                                         |                  |                                                           |                  |
| DunedinPoAm                                     | 21.5%                                                 | (-258.2% 261.4%) | 17.9%                                                   | (-465.7% 619.5%) | 9.8%                                                      | (-286.4% 322.0%) |
| <b>Clocks trained on other aging biomarkers</b> |                                                       |                  |                                                         |                  |                                                           |                  |
| Yang                                            | 2.1%                                                  | (-126.5% 107.1%) | -4.7%                                                   | (-206.1% 138.8%) | -3.3%                                                     | (-105.5% 174.4%) |
| Telomere                                        | -54.2%                                                | (-665.0% 414.6%) | 2.0%                                                    | (-144.2% 203.1%) | -2.4%                                                     | (-189.6% 220.8%) |
| <b>Behavioral/Lifestyle measures</b>            |                                                       |                  |                                                         |                  |                                                           |                  |
| Sedentary behavior                              | 9.2%                                                  | (-116.7% 173.0%) | 3.7%                                                    | (-225.0% 218.1%) | 1.7%                                                      | (-98.0% 143.0%)  |
| Healthy eating index                            | 25.8%                                                 | (-130.7% 268.6%) | 7.0%                                                    | (-271.6% 278.2%) | 0.0%                                                      | (-140.0% 124.9%) |
| Smoking pack years                              | -19.5%                                                | (-150.5% 77.0%)  | -8.9%                                                   | (-275.0% 269.8%) | -2.3%                                                     | (-179.2% 128.6%) |
| Alcohol drinker                                 | -5.6%                                                 | (-118.9% 67.5%)  | -0.9%                                                   | (-147.8% 168.6%) | 1.8%                                                      | (-216.9% 219.7%) |
| <b>Anthropometric measures</b>                  |                                                       |                  |                                                         |                  |                                                           |                  |
| Waist to thigh ratio                            | -18.5%                                                | (-181.3% 80.9%)  | 1.1%                                                    | (-252.0% 137.5%) | 0.7%                                                      | (-101.5% 116.1%) |
| BMI                                             | 0.4%                                                  | (-29.9% 44.9%)   | -0.2%                                                   | (-54.7% 47.3%)   | 0.0%                                                      | (-21.3% 27.4%)   |
| <b>Clinical used blood Biomarkers</b>           |                                                       |                  |                                                         |                  |                                                           |                  |
| Total cholesterol                               | -3.1%                                                 | (-57.4% 23.2%)   | -0.1%                                                   | (-38.9% 36.1%)   | -0.1%                                                     | (-57.5% 64.6%)   |
| HDL                                             | 0.8%                                                  | (-15.6% 27.0%)   | 2.8%                                                    | (-153.4% 138.9%) | -0.5%                                                     | (-49.4% 36.6%)   |
| LDL                                             | -1.3%                                                 | (-30.5% 21.8%)   | 0.2%                                                    | (-55.5% 55.5%)   | 0.0%                                                      | (-71.2% 63.7%)   |
| Glucose                                         | -10.8%                                                | (-184.9% 120.3%) | 0.0%                                                    | (-106.7% 173.2%) | 1.1%                                                      | (-89.4% 101.3%)  |
| C-reactive protein                              | 7.1%                                                  | (-61.0% 73.4%)   | 0.2%                                                    | (-37.1% 30.0%)   | 0.2%                                                      | (-34.6% 27.8%)   |

**Supplementary Table 12. Average mediated proportions for DNA methylation and clinical mediators on the relationship between education attainment and cancer-specific mortality, NHANES 1999-2002 (n=2,402). Bold indicates statistical significance (p-value<0.05), and bold with two asterisks indicates significance passed Bonferroni adjustment (p-value<0.0021).**

|                                                 | Model 1. Less than high school (N=1,096)<br>vs. College degree or higher (N= 370) |                     | Model 2. High school<br>graduate/GED (N=496)<br>vs. College degree or higher (N=370) |                     | Model 3. Some college or<br>associates degree (N=440)<br>vs. College degree or higher (N=370) |                     |
|-------------------------------------------------|-----------------------------------------------------------------------------------|---------------------|--------------------------------------------------------------------------------------|---------------------|-----------------------------------------------------------------------------------------------|---------------------|
|                                                 | Average mediated<br>proportion                                                    | (95% CI)            | Average<br>mediated<br>proportion                                                    | (95% CI)            | Average<br>mediated<br>proportion                                                             | (95% CI)            |
| <b>Chronological age clocks</b>                 |                                                                                   |                     |                                                                                      |                     |                                                                                               |                     |
| Hannum                                          | 1.0%                                                                              | (-1.3% 5.6%)        | 3.8%                                                                                 | (-0.1% 14.5%)       | 0.5%                                                                                          | (-5.2% 5.5%)        |
| Hovarth                                         | -0.1%                                                                             | (-3.4% 1.9%)        | -1.9%                                                                                | (-8.9% 1.0%)        | -3.4%                                                                                         | (-12.1% 0.1%)       |
| Weidner                                         | 0.9%                                                                              | (-1.9% 6.9%)        | 0.0%                                                                                 | (-2.5% 2.9%)        | -1.3%                                                                                         | (-7.8% 1.6%)        |
| Lin                                             | 0.1%                                                                              | (-1.5% 2.4%)        | -1.2%                                                                                | (-6.2% 1.3%)        | -1.2%                                                                                         | (-5.7% 0.9%)        |
| Vidal-Bralo                                     | -0.5%                                                                             | (-4.4% 1.5%)        | -0.3%                                                                                | (-5.5% 2.5%)        | -0.5%                                                                                         | (-6.6% 2.9%)        |
| SkinBlood                                       | -0.7%                                                                             | (-4.2% 0.4%)        | 0.2%                                                                                 | (-5.5% 4.3%)        | -0.1%                                                                                         | (-2.3% 2.2%)        |
| Zhang                                           | 0.0%                                                                              | (-1.3% 0.8%)        | 0.0%                                                                                 | (-2.0% 2.1%)        | 0.0%                                                                                          | (-3.4% 2.9%)        |
| <b>Physiological functioning clocks</b>         |                                                                                   |                     |                                                                                      |                     |                                                                                               |                     |
| PhenoAge                                        | 2.2%                                                                              | (-2.5% 12.1%)       | 2.5%                                                                                 | (-1.7% 13.2%)       | 1.2%                                                                                          | (-2.9% 8.4%)        |
| GrimAge                                         | <b>20.3%</b>                                                                      | <b>(5.4% 56.1%)</b> | <b>9.0%**</b>                                                                        | <b>(2.7% 30.1%)</b> | <b>13.3%</b>                                                                                  | <b>(2.8% 36.0%)</b> |
| GrimAge2                                        | <b>20.0%</b>                                                                      | <b>(3.5% 48.9%)</b> | <b>10.2%</b>                                                                         | <b>(3.8% 30.4%)</b> | 12.1%                                                                                         | (-0.9% 34.4%)       |
| <b>Pace of aging clock</b>                      |                                                                                   |                     |                                                                                      |                     |                                                                                               |                     |
| DunedinPoAm                                     | 9.7%                                                                              | (-1.5% 37.6%)       | <b>6.6%</b>                                                                          | <b>(0.7% 25.6%)</b> | 6.5%                                                                                          | (-3.4% 20.9%)       |
| <b>Clocks trained on other aging biomarkers</b> |                                                                                   |                     |                                                                                      |                     |                                                                                               |                     |
| Yang                                            | -1.7%                                                                             | (-18.8% 5.5%)       | 0.4%                                                                                 | (-5.0% 4.7%)        | 0.1%                                                                                          | (-5.1% 7.3%)        |
| Telomere                                        | 2.8%                                                                              | (-2.3% 12.7%)       | 2.9%                                                                                 | (-3.7% 11.5%)       | 1.3%                                                                                          | (-1.6% 6.6%)        |
| <b>Behavioral/Lifestyle measures</b>            |                                                                                   |                     |                                                                                      |                     |                                                                                               |                     |
| Sedentary behavior                              | 2.0%                                                                              | (-12.6% 27.5%)      | 11.4%                                                                                | (-1.4% 38.2%)       | -0.8%                                                                                         | (-13.2% 8.0%)       |
| Healthy eating index                            | -0.8%                                                                             | (-18.3% 45.1%)      | <b>18.8%</b>                                                                         | <b>(3.6% 55.4%)</b> | <b>11.0%</b>                                                                                  | <b>(2.0% 26.0%)</b> |
| Smoking pack years                              | 6.3%                                                                              | (-0.6% 27.3%)       | <b>7.8%</b>                                                                          | <b>(2.1% 29.6%)</b> | <b>9.9%**</b>                                                                                 | <b>(4.0% 25.5%)</b> |
| Alcohol drinker                                 | -6.5%                                                                             | (-32.9% 1.3%)       | -5.4%                                                                                | (-35.1% 1.8%)       | -0.5%                                                                                         | (-10.3% 4.6%)       |
| <b>Anthropometric measures</b>                  |                                                                                   |                     |                                                                                      |                     |                                                                                               |                     |
| Waist to thigh ratio                            | -1.5%                                                                             | (-22.3% 8.2%)       | 1.8%                                                                                 | (-2.9% 10.0%)       | 0.3%                                                                                          | (-3.4% 5.5%)        |
| BMI                                             | -8.8%                                                                             | (-46.6% 2.0%)       | -0.5%                                                                                | (-6.3% 5.7%)        | 3.6%                                                                                          | (-4.0% 11.6%)       |
| <b>Clinical used blood Biomarkers</b>           |                                                                                   |                     |                                                                                      |                     |                                                                                               |                     |
| Total cholesterol                               | 0.0%                                                                              | (-5.9% 3.9%)        | <b>7.2%</b>                                                                          | <b>(1.2% 27.1%)</b> | -5.6%                                                                                         | (-24.9% 0.9%)       |
| HDL                                             | -4.2%                                                                             | (-22.0% 1.7%)       | -1.2%                                                                                | (-13.0% 1.5%)       | 0.7%                                                                                          | (-4.2% 9.2%)        |
| LDL                                             | 0.0%                                                                              | (-6.4% 5.1%)        | <b>8.4%</b>                                                                          | <b>(1.4% 27.5%)</b> | -3.9%                                                                                         | (-16.3% 2.1%)       |
| Glucose                                         | -3.3%                                                                             | (-20.7% 4.4%)       | -1.7%                                                                                | (-10.8% 2.2%)       | -0.2%                                                                                         | (-4.7% 2.0%)        |
| C-reactive protein                              | 0.5%                                                                              | (-1.4% 3.7%)        | 0.1%                                                                                 | (-1.5% 1.6%)        | 0.1%                                                                                          | (-1.7% 2.9%)        |

**Supplementary Table 13. Average mediated proportions for DNA methylation and clinical mediators on the relationship between household income and cancer-specific mortality, NHANES 1999-2002 (n=2,402). Bold indicates statistical significance (p-value<0.05), and bold with two asterisks indicates significance passed Bonferroni adjustment (p-value<0.0021).**

|                                                 | Model 1. PIR<1 (N=373)<br>vs. PIR 5+ (N= 399) |                       | Model 2. PIR 1-2 (N=707)<br>vs. PIR 5+ (N= 399) |                  | Model 3. PIR 2-5 (N=923)<br>vs. PIR 5+ (N= 399) |                  |
|-------------------------------------------------|-----------------------------------------------|-----------------------|-------------------------------------------------|------------------|-------------------------------------------------|------------------|
|                                                 | Average mediated proportion                   | (95% CI)              | Average mediated proportion                     | (95% CI)         | Average mediated proportion                     | (95% CI)         |
| <b>Chronological age clocks</b>                 |                                               |                       |                                                 |                  |                                                 |                  |
| Hannum                                          | 4.6%                                          | (-22.2% 47.4%)        | 1.7%                                            | (-6.5% 16.9%)    | 0.4%                                            | (-53.5% 84.1%)   |
| Hovarth                                         | -0.1%                                         | (-23.6% 27.5%)        | 0.0%                                            | (-7.4% 5.6%)     | -1.3%                                           | (-45.4% 41.3%)   |
| Weidner                                         | -0.3%                                         | (-30.3% 20.4%)        | 0.7%                                            | (-11.4% 17.5%)   | 0.0%                                            | (-15.2% 9.4%)    |
| Lin                                             | 2.9%                                          | (-12.8% 37.2%)        | -0.4%                                           | (-12.9% 7.7%)    | -1.2%                                           | (-32.1% 20.3%)   |
| Vidal-Bralo                                     | -2.6%                                         | (-91.4% 42.0%)        | 0.2%                                            | (-8.5% 13.0%)    | -0.8%                                           | (-50.5% 35.1%)   |
| SkinBlood                                       | 0.7%                                          | (-13.4% 24.9%)        | 0.0%                                            | (-4.7% 4.9%)     | -2.8%                                           | (-33.1% 36.6%)   |
| Zhang                                           | 0.1%                                          | (-22.1% 16.1%)        | 0.5%                                            | (-3.5% 9.4%)     | -1.1%                                           | (-30.6% 19.3%)   |
| <b>Physiological functioning clocks</b>         |                                               |                       |                                                 |                  |                                                 |                  |
| PhenoAge                                        | 5.0%                                          | (-49.0% 74.1%)        | 7.5%                                            | (-9.2% 56.9%)    | 8.0%                                            | (-100.5% 148.4%) |
| GrimAge                                         | <b>75.8%</b>                                  | <b>(30.3% 325.9%)</b> | 29.2%                                           | (-3.0% 161.3%)   | 35.3%                                           | (-479.9% 617.9%) |
| GrimAge2                                        | <b>79.7%</b>                                  | <b>(28.4% 415.5%)</b> | 35.4%                                           | (-3.4% 195.6%)   | 38.0%                                           | (-388.4% 648.5%) |
| <b>Pace of aging clock</b>                      |                                               |                       |                                                 |                  |                                                 |                  |
| DunedinPoAm                                     | <b>53.9%</b>                                  | <b>(11.8% 240.9%)</b> | 13.0%                                           | (-13.4% 106.8%)  | 19.4%                                           | (-286.6% 352.8%) |
| <b>Clocks trained on other aging biomarkers</b> |                                               |                       |                                                 |                  |                                                 |                  |
| Yang                                            | -0.8%                                         | (-38.8% 36.9%)        | 0.1%                                            | (-15.6% 24.2%)   | -0.2%                                           | (-24.0% 28.9%)   |
| Telomere                                        | 12.5%                                         | (-40.6% 116.3%)       | 8.5%                                            | (-3.8% 54.0%)    | 3.6%                                            | (-43.5% 53.3%)   |
| <b>Behavioral/Lifestyle measures</b>            |                                               |                       |                                                 |                  |                                                 |                  |
| Sedentary behavior                              | 41.3%                                         | (-265.1% 342.8%)      | -0.8%                                           | (-65.8% 107.4%)  | 5.7%                                            | (-256.2% 194.7%) |
| Healthy eating index                            | 67.6%                                         | (-528.8% 618.2%)      | 21.1%                                           | (-131.8% 252.1%) | 19.3%                                           | (-444.2% 516.9%) |
| Smoking pack years                              | <b>31.9%</b>                                  | <b>(11.7% 127.7%)</b> | 23.4%                                           | (-114.1% 171.3%) | 18.5%                                           | (-305.0% 354.0%) |
| Alcohol drinker                                 | -50.3%                                        | (-316.9% 56.6%)       | -18.1%                                          | (-178.6% 68.2%)  | -4.4%                                           | (-156.4% 165.7%) |
| <b>Anthropometric measures</b>                  |                                               |                       |                                                 |                  |                                                 |                  |
| Waist to thigh ratio                            | -8.0%                                         | (-151.2% 74.2%)       | 6.3%                                            | (-27.1% 79.5%)   | 7.0%                                            | (-118.1% 201.9%) |
| BMI                                             | -3.1%                                         | (-116.3% 71.6%)       | -10.3%                                          | (-87.9% 38.2%)   | 6.0%                                            | (-134.5% 210.4%) |
| <b>Clinical used blood Biomarkers</b>           |                                               |                       |                                                 |                  |                                                 |                  |
| Total cholesterol                               | -2.2%                                         | (-40.1% 11.2%)        | -0.5%                                           | (-21.4% 10.0%)   | 7.0%                                            | (-113.5% 139.8%) |
| HDL                                             | 20.0%                                         | (-61.7% 172.3%)       | 12.8%                                           | (-28.2% 106.7%)  | -4.2%                                           | (-116.4% 89.8%)  |
| LDL                                             | -2.8%                                         | (-56.1% 31.5%)        | -0.1%                                           | (-24.1% 15.9%)   | 12.8%                                           | (-233.9% 270.1%) |
| Glucose                                         | -10.6%                                        | (-168.7% 122.5%)      | 0.2%                                            | (-19.2% 30.6%)   | -5.6%                                           | (-147.4% 111.6%) |
| C-reactive protein                              | 5.2%                                          | (-12.7% 42.7%)        | 3.0%                                            | (-21.3% 43.1%)   | 2.4%                                            | (-74.5% 46.3%)   |

**Supplementary Table 14. Average mediated proportions for DNA methylation and clinical mediators on the relationship between occupation status and cancer-specific mortality, NHANES 1999-2002 (n=2,402). Bold indicates statistical significance (p-value<0.05), and bold with two asterisks indicates significance passed Bonferroni adjustment (p-value<0.0021).**

**Supplementary Table 15. Average mediated proportions for DNA methylation and clinical mediators on the relationship between race and ethnicity and all-cause mortality among women of NHANES 1999-2002 (n=1,172). Bold indicates statistical significance (p-value<0.05), and bold with two asterisks indicates significance passed Bonferroni adjustment (p-value<0.0021).**

|                                                 | Model 1. Black (N=250)<br>vs. White (N=456) |                  | Model 2. Hispanic (N=419)<br>vs. White (N=456) |                        | Model 3. Other races (N=47)<br>vs. White (N= 456) |                  |
|-------------------------------------------------|---------------------------------------------|------------------|------------------------------------------------|------------------------|---------------------------------------------------|------------------|
|                                                 | Average mediated<br>proportion              | (95% CI)         | Average mediated<br>proportion                 | (95% CI)               | Average<br>mediated<br>proportion                 | (95% CI)         |
| <b>Chronological age clocks</b>                 |                                             |                  |                                                |                        |                                                   |                  |
| Hannum                                          | -44.6%                                      | (-362.1% 237.7%) | 2.0%                                           | (-15.0% 16.5%)         | 3.6%                                              | (-126.7% 116.8%) |
| Hovarth                                         | -12.0%                                      | (-125.2% 42.3%)  | -7.4%                                          | (-27.0% 0.2%)          | -1.4%                                             | (-48.8% 53.2%)   |
| Weidner                                         | -14.6%                                      | (-139.0% 67.0%)  | <b>-8.8%</b>                                   | <b>(-26.6% - 0.3%)</b> | -14.9%                                            | (-260.1% 144.7%) |
| Lin                                             | -11.2%                                      | (-112.1% 55.2%)  | <b>-8.5%</b>                                   | <b>(-29.3% - 0.9%)</b> | -5.7%                                             | (-108.2% 101.9%) |
| Vidal-Bralo                                     | -40.5%                                      | (-440.9% 214.2%) | <b>-14.2%**</b>                                | <b>(-38.7% - 4.9%)</b> | -17.7%                                            | (-152.1% 263.1%) |
| SkinBlood                                       | -17.3%                                      | (-259.4% 109.7%) | -2.9%                                          | (-16.6% 4.7%)          | 1.1%                                              | (-59.2% 52.8%)   |
| Zhang                                           | -28.5%                                      | (-233.7% 197.7%) | -3.5%                                          | (-15.5% 2.1%)          | -2.3%                                             | (-81.1% 49.3%)   |
| <b>Physiological functioning clocks</b>         |                                             |                  |                                                |                        |                                                   |                  |
| PhenoAge                                        | -24.5%                                      | (-274.6% 172.6%) | 2.1%                                           | (-9.8% 16.7%)          | 0.1%                                              | (-84.3% 59.8%)   |
| GrimAge                                         | 24.2%                                       | (-117.2% 213.7%) | 3.1%                                           | (-20.3% 20.8%)         | 17.5%                                             | (-114.6% 239.1%) |
| GrimAge2                                        | 43.2%                                       | (-251.1% 286.3%) | <b>18.7%</b>                                   | <b>(2.3% 44.1%)</b>    | 24.9%                                             | (-119.9% 312.7%) |
| <b>Pace of aging clock</b>                      |                                             |                  |                                                |                        |                                                   |                  |
| DunedinPoAm                                     | 18.8%                                       | (-38.2% 170.4%)  | <b>15.3%**</b>                                 | <b>(6.0% 34.9%)</b>    | 21.6%                                             | (-112.6% 219.5%) |
| <b>Clocks trained on other aging biomarkers</b> |                                             |                  |                                                |                        |                                                   |                  |
| Yang                                            | 9.8%                                        | (-80.7% 151.7%)  | 1.8%                                           | (-9.2% 14.3%)          | -1.0%                                             | (-97.3% 92.4%)   |
| Telomere                                        | -89.1%                                      | (-656.7% 424.6%) | 3.1%                                           | (-16.4% 18.4%)         | 8.2%                                              | (-179.9% 320.9%) |
| <b>Behavioral/Lifestyle measures</b>            |                                             |                  |                                                |                        |                                                   |                  |
| Sedentary behavior                              | 33.1%                                       | (-81.6% 184.1%)  | <b>16.1%</b>                                   | <b>(2.3% 38.9%)</b>    | 15.5%                                             | (-171.0% 147.2%) |
| Healthy eating index                            | 2.1%                                        | (-18.7% 28.5%)   | 2.1%                                           | (-3.9% 11.7%)          | 0.6%                                              | (-31.6% 31.8%)   |
| Smoking pack years                              | -28.4%                                      | (-272.6% 193.4%) | <b>-7.0%</b>                                   | <b>(-17.4% - 1.9%)</b> | -3.4%                                             | (-62.0% 48.6%)   |
| Alcohol drinker                                 | 30.1%                                       | (-133.1% 195.9%) | <b>13.4%</b>                                   | <b>(2.2% 40.2%)</b>    | 23.1%                                             | (-307.2% 459.0%) |
| <b>Anthropometric measures</b>                  |                                             |                  |                                                |                        |                                                   |                  |
| Waist to thigh ratio                            | -21.7%                                      | (-166.9% 1.3%)   | <b>14.9%</b>                                   | <b>(3.3% 45.0%)</b>    | 7.6%                                              | (-98.0% 103.0%)  |
| BMI                                             | 9.0%                                        | (-49.8% 77.3%)   | 1.2%                                           | (-7.8% 10.4%)          | 0.9%                                              | (-16.4% 21.1%)   |
| <b>Clinical used blood Biomarkers</b>           |                                             |                  |                                                |                        |                                                   |                  |
| Total cholesterol                               | 0.0%                                        | (-12.8% 10.2%)   | 0.0%                                           | (-5.4% 8.0%)           | 0.0%                                              | (-23.7% 18.8%)   |
| HDL                                             | 0.0%                                        | (-14.9% 13.8%)   | 6.1%                                           | (-8.1% 26.0%)          | 1.2%                                              | (-57.2% 53.9%)   |
| LDL                                             | 0.5%                                        | (-15.3% 18.3%)   | 0.1%                                           | (-7.3% 10.3%)          | 0.2%                                              | (-40.3% 47.0%)   |
| Glucose                                         | 25.6%                                       | (-90.6% 216.3%)  | 2.2%                                           | (-3.5% 12.4%)          | 6.3%                                              | (-67.0% 91.1%)   |
| C-reactive protein                              | 19.9%                                       | (-61.4% 163.7%)  | 0.2%                                           | (-2.5% 3.5%)           | -0.7%                                             | (-30.5% 29.7%)   |

**Supplementary Table 16. Average mediated proportions for DNA methylation and clinical mediators on the relationship between race and ethnicity and all-cause mortality among men of NHANES 1999-2002 (n=1,230). Bold indicates statistical significance (p-value<0.05), and bold with two asterisks indicates significance passed Bonferroni adjustment (p-value<0.0021).**

|                                                 | Model 1. Black (N=266)<br>vs. White (N=487) |                         | Model 2. Hispanic (N=441)<br>vs. White (N=487) |                   | Model 3. Other races (N=36)<br>vs. White (N=487) |                  |
|-------------------------------------------------|---------------------------------------------|-------------------------|------------------------------------------------|-------------------|--------------------------------------------------|------------------|
|                                                 | Average mediated<br>proportion              | (95% CI)                | Average<br>mediated<br>proportion              | (95% CI)          | Average<br>mediated<br>proportion                | (95% CI)         |
| <b>Chronological age clocks</b>                 |                                             |                         |                                                |                   |                                                  |                  |
| Hannum                                          | -9.1%                                       | <b>(-19.5% - 3.1%)</b>  | 6.0%                                           | (-197.8% 177.4%)  | -3.0%                                            | (-142.4% 172.4%) |
| Hovarth                                         | -0.6%                                       | (-6.9% 4.4%)            | 1.1%                                           | (-101.8% 79.8%)   | -0.3%                                            | (-76.2% 61.8%)   |
| Weidner                                         | 0.0%                                        | (-2.0% 1.6%)            | 0.0%                                           | (-43.4% 42.2%)    | 0.0%                                             | (-26.8% 34.2%)   |
| Lin                                             | 0.1%                                        | (-2.9% 3.8%)            | 0.2%                                           | (-71.0% 62.3%)    | 0.0%                                             | (-35.2% 26.5%)   |
| Vidal-Bralo                                     | -3.9%                                       | (-13.1% 1.1%)           | -0.4%                                          | (-65.3% 64.0%)    | 1.1%                                             | (-45.7% 46.4%)   |
| SkinBlood                                       | -0.4%                                       | (-4.7% 1.5%)            | 0.1%                                           | (-58.6% 37.7%)    | -0.5%                                            | (-44.9% 31.7%)   |
| Zhang                                           | -3.8%                                       | (-11.8% 0.8%)           | 0.2%                                           | (-41.4% 36.7%)    | 0.1%                                             | (-34.2% 35.9%)   |
| <b>Physiological functioning clocks</b>         |                                             |                         |                                                |                   |                                                  |                  |
| PhenoAge                                        | 2.7%                                        | (-5.7% 11.8%)           | 11.3%                                          | (-366.7% 298.5%)  | -6.2%                                            | (-320.5% 143.0%) |
| GrimAge                                         | <b>43.9%**</b>                              | <b>(22.0% 92.0%)</b>    | 17.6%                                          | (-937.4% 656.1%)  | 11.1%                                            | (-297.6% 223.7%) |
| GrimAge2                                        | <b>51.0%**</b>                              | <b>(26.9% 95.3%)</b>    | 50.6%                                          | (-848.5% 1216.9%) | 7.1%                                             | (-286.5% 245.1%) |
| <b>Pace of aging clock</b>                      |                                             |                         |                                                |                   |                                                  |                  |
| DunedinPoAm                                     | <b>29.2%**</b>                              | <b>(12.8% 57.8%)</b>    | 38.3%                                          | (-569.0% 753.6%)  | -5.3%                                            | (-297.3% 166.7%) |
| <b>Clocks trained on other aging biomarkers</b> |                                             |                         |                                                |                   |                                                  |                  |
| Yang                                            | 5.9%                                        | (-5.6% 19.1%)           | -0.2%                                          | (-133.1% 151.7%)  | -3.0%                                            | (-67.0% 70.6%)   |
| Telomere                                        | <b>-24.5%**</b>                             | <b>(-46.1% - 11.7%)</b> | 1.1%                                           | (-103.4% 111.3%)  | -3.2%                                            | (-204.3% 111.2%) |
| <b>Behavioral/Lifestyle measures</b>            |                                             |                         |                                                |                   |                                                  |                  |
| Sedentary behavior                              | <b>23.7%**</b>                              | <b>(10.3% 54.7%)</b>    | 11.2%                                          | (-286.8% 252.6%)  | -0.1%                                            | (-113.6% 215.3%) |
| Healthy eating index                            | <b>9.3%</b>                                 | <b>(1.0% 23.7%)</b>     | -1.0%                                          | (-116.8% 104.5%)  | 10.5%                                            | (-242.3% 276.9%) |
| Smoking pack years                              | -6.7%                                       | (-21.4% 1.9%)           | -8.1%                                          | (-320.4% 286.0%)  | 10.3%                                            | (-239.3% 262.0%) |
| Alcohol drinker                                 | 3.7%                                        | (-2.6% 13.4%)           | 0.0%                                           | (-38.9% 49.0%)    | -2.3%                                            | (-103.0% 127.1%) |
| <b>Anthropometric measures</b>                  |                                             |                         |                                                |                   |                                                  |                  |
| Waist to thigh ratio                            | <b>-41.6%**</b>                             | <b>(-113.8%- 18.0%)</b> | 0.6%                                           | (-227.0% 290.1%)  | 9.1%                                             | (-311.9% 286.9%) |
| BMI                                             | -0.1%                                       | (-7.8% 3.9%)            | 0.0%                                           | (-151.1% 142.6%)  | 2.8%                                             | (-124.8% 190.4%) |
| <b>Clinical used blood Biomarkers</b>           |                                             |                         |                                                |                   |                                                  |                  |
| Total cholesterol                               | -1.2%                                       | (-13.1% 6.0%)           | 0.2%                                           | (-62.6% 73.1%)    | 1.7%                                             | (-117.7% 105.1%) |
| HDL                                             | 0.8%                                        | (-14.4% 14.5%)          | 0.0%                                           | (-19.5% 31.9%)    | 0.1%                                             | (-70.6% 29.3%)   |
| LDL                                             | 0.5%                                        | (-10.8% 9.2%)           | 0.6%                                           | (-88.3% 84.2%)    | 1.2%                                             | (-152.5% 137.7%) |
| Glucose                                         | 1.2%                                        | (-1.0% 5.6%)            | 6.1%                                           | (-146.0% 135.5%)  | -1.7%                                            | (-78.1% 68.9%)   |
| C-reactive protein                              | <b>5.8%</b>                                 | <b>(0.3% 18.4%)</b>     | 2.9%                                           | (-89.1% 84.8%)    | 1.2%                                             | (-37.8% 39.2%)   |

**Supplementary Table 17. Average mediated proportions for DNA methylation and clinical mediators on the relationship between education attainment and all-cause mortality among women of NHANES 1999-2002 (n=1,172). Bold indicates statistical significance (p-value<0.05), and bold with two asterisks indicates significance passed Bonferroni adjustment (p-value<0.0021).**

|                                                 | Model 1. Less than high school (N=543) vs. College degree or higher (N=136) |               |               | Model 2. High school graduate/GED (N=271) vs. College degree or higher (N=136) |          |         | Model 3. Some college or associates degree (N=222) vs. College degree or higher (N=136) |          |         |
|-------------------------------------------------|-----------------------------------------------------------------------------|---------------|---------------|--------------------------------------------------------------------------------|----------|---------|-----------------------------------------------------------------------------------------|----------|---------|
|                                                 | Average mediated proportion                                                 | (95% CI)      |               | Average mediated proportion                                                    | (95% CI) |         | Average mediated proportion                                                             | (95% CI) |         |
| <b>Chronological age clocks</b>                 |                                                                             |               |               |                                                                                |          |         |                                                                                         |          |         |
| Hannum                                          | 2.4%                                                                        | (-1.0%        | 11.4%)        | 12.9%                                                                          | (-14.4%  | 71.5%)  | 0.9%                                                                                    | (-70.9%  | 79.8%)  |
| Hovarth                                         | -0.1%                                                                       | (-4.5%        | 2.7%)         | -1.7%                                                                          | (-36.6%  | 8.1%)   | -8.5%                                                                                   | (-144.7% | 150.9%) |
| Weidner                                         | -0.9%                                                                       | (-8.9%        | 1.8%)         | -3.1%                                                                          | (-64.0%  | 28.0%)  | -5.2%                                                                                   | (-96.6%  | 86.8%)  |
| Lin                                             | -0.5%                                                                       | (-7.5%        | 4.6%)         | -1.2%                                                                          | (-24.8%  | 13.3%)  | -2.1%                                                                                   | (-88.4%  | 42.6%)  |
| Vidal-Bralo                                     | -2.4%                                                                       | (-13.8%       | 1.5%)         | -2.3%                                                                          | (-27.5%  | 6.4%)   | -5.9%                                                                                   | (-199.9% | 93.7%)  |
| SkinBlood                                       | 0.7%                                                                        | (-2.3%        | 7.8%)         | 3.0%                                                                           | (-19.0%  | 43.2%)  | -0.3%                                                                                   | (-31.1%  | 20.0%)  |
| Zhang                                           | 1.2%                                                                        | (-3.4%        | 9.4%)         | 1.8%                                                                           | (-6.7%   | 32.5%)  | -0.8%                                                                                   | (-71.7%  | 41.7%)  |
| <b>Physiological functioning clocks</b>         |                                                                             |               |               |                                                                                |          |         |                                                                                         |          |         |
| PhenoAge                                        | <b>6.7%</b>                                                                 | <b>(0.3%</b>  | <b>26.2%)</b> | 5.0%                                                                           | (-19.2%  | 45.7%)  | 1.8%                                                                                    | (-88.1%  | 114.6%) |
| GrimAge                                         | <b>19.7%**</b>                                                              | <b>(7.7%</b>  | <b>45.4%)</b> | 17.6%                                                                          | (-4.3%   | 129.4%) | 25.6%                                                                                   | (-216.3% | 251.6%) |
| GrimAge2                                        | <b>26.5%**</b>                                                              | <b>(11.8%</b> | <b>63.2%)</b> | 19.2%                                                                          | (-17.5%  | 135.0%) | 31.8%                                                                                   | (-200.3% | 337.2%) |
| <b>Pace of aging clock</b>                      |                                                                             |               |               |                                                                                |          |         |                                                                                         |          |         |
| DunedinPoAm                                     | <b>11.0%**</b>                                                              | <b>(3.3%</b>  | <b>26.6%)</b> | 10.5%                                                                          | (-5.7%   | 54.5%)  | 15.7%                                                                                   | (-175.7% | 152.1%) |
| <b>Clocks trained on other aging biomarkers</b> |                                                                             |               |               |                                                                                |          |         |                                                                                         |          |         |
| Yang                                            | -1.8%                                                                       | (-7.1%        | 2.2%)         | 1.6%                                                                           | (-10.3%  | 28.3%)  | 0.7%                                                                                    | (-23.2%  | 20.0%)  |
| Telomere                                        | <b>7.1%</b>                                                                 | <b>(1.4%</b>  | <b>19.5%)</b> | 5.1%                                                                           | (-9.1%   | 45.8%)  | 7.7%                                                                                    | (-71.4%  | 131.3%) |
| <b>Behavioral/Lifestyle measures</b>            |                                                                             |               |               |                                                                                |          |         |                                                                                         |          |         |
| Sedentary behavior                              | <b>20.1%</b>                                                                | <b>(4.3%</b>  | <b>70.3%)</b> | 16.9%                                                                          | (-2.6%   | 92.7%)  | 3.5%                                                                                    | (-73.9%  | 90.7%)  |
| Healthy eating index                            | 0.4%                                                                        | (-13.1%       | 19.1%)        | 1.0%                                                                           | (-65.6%  | 56.7%)  | 0.4%                                                                                    | (-71.5%  | 73.1%)  |
| Smoking pack years                              | <b>7.6%</b>                                                                 | <b>(1.0%</b>  | <b>19.3%)</b> | 5.2%                                                                           | (-17.5%  | 65.9%)  | 6.4%                                                                                    | (-89.5%  | 86.0%)  |
| Alcohol drinker                                 | 3.7%                                                                        | (-8.9%        | 16.8%)        | 16.3%                                                                          | (-6.0%   | 75.6%)  | -0.9%                                                                                   | (-38.1%  | 24.7%)  |
| <b>Anthropometric measures</b>                  |                                                                             |               |               |                                                                                |          |         |                                                                                         |          |         |
| Waist to thigh ratio                            | 4.8%                                                                        | (-1.0%        | 23.4%)        | -0.6%                                                                          | (-26.2%  | 19.5%)  | -1.7%                                                                                   | (-76.0%  | 36.9%)  |
| BMI                                             | -0.7%                                                                       | (-12.9%       | 12.8%)        | 5.6%                                                                           | (-3.1%   | 32.8%)  | 0.8%                                                                                    | (-32.3%  | 33.2%)  |
| <b>Clinical used blood Biomarkers</b>           |                                                                             |               |               |                                                                                |          |         |                                                                                         |          |         |
| Total cholesterol                               | 0.0%                                                                        | (-6.6%        | 4.9%)         | -5.2%                                                                          | (-59.8%  | 42.9%)  | -2.2%                                                                                   | (-92.2%  | 53.3%)  |
| HDL                                             | 3.0%                                                                        | (-6.0%        | 16.8%)        | 0.1%                                                                           | (-12.2%  | 13.0%)  | -0.1%                                                                                   | (-30.5%  | 38.4%)  |
| LDL                                             | 0.1%                                                                        | (-9.4%        | 6.5%)         | -5.5%                                                                          | (-73.1%  | 25.2%)  | -0.9%                                                                                   | (-70.8%  | 72.4%)  |
| Glucose                                         | 1.4%                                                                        | (-4.2%        | 10.5%)        | -3.0%                                                                          | (-51.9%  | 17.1%)  | 0.3%                                                                                    | (-71.7%  | 69.5%)  |
| C-reactive protein                              | <b>3.2%</b>                                                                 | <b>(0.5%</b>  | <b>9.9%)</b>  | 6.8%                                                                           | (-3.3%   | 33.4%)  | 4.0%                                                                                    | (-66.4%  | 65.8%)  |

**Supplementary Table 18. Average mediated proportions for DNA methylation and clinical mediators on the relationship between education attainment and all-cause mortality among men of NHANES 1999-2002 (n=1,230). Bold indicates statistical significance (p-value<0.05), and bold with two asterisks indicates significance passed Bonferroni adjustment (p-value<0.0021).**

|                                                 | Model 1. Less than high school (N=553) vs. College degree or higher (N=234) |               |               | Model 2. High school graduate/GED (N=225) vs. College degree or higher (N=234) |              |               | Model 3. Some college or associates degree (N=218) vs. College degree or higher (N=234) |               |               |
|-------------------------------------------------|-----------------------------------------------------------------------------|---------------|---------------|--------------------------------------------------------------------------------|--------------|---------------|-----------------------------------------------------------------------------------------|---------------|---------------|
|                                                 | Average mediated proportion                                                 | (95% CI)      |               | Average mediated proportion                                                    | (95% CI)     |               | Average mediated proportion                                                             | (95% CI)      |               |
| <b>Chronological age clocks</b>                 |                                                                             |               |               |                                                                                |              |               |                                                                                         |               |               |
| Hannum                                          | 1.2%                                                                        | (-0.3%        | 4.1%)         | 1.5%                                                                           | (-3.0%       | 8.3%)         | -0.2%                                                                                   | (-11.2%       | 10.2%)        |
| Hovarth                                         | 0.0%                                                                        | (-2.3%        | 1.8%)         | -1.9%                                                                          | (-10.6%      | 2.2%)         | -2.4%                                                                                   | (-13.7%       | 1.6%)         |
| Weidner                                         | 0.0%                                                                        | (-2.4%        | 2.3%)         | -0.3%                                                                          | (-6.2%       | 2.5%)         | 0.0%                                                                                    | (-4.5%        | 4.3%)         |
| Lin                                             | -0.1%                                                                       | (-2.3%        | 0.9%)         | -1.3%                                                                          | (-8.3%       | 1.7%)         | 0.8%                                                                                    | (-5.1%        | 9.7%)         |
| Vidal-Bralo                                     | 0.0%                                                                        | (-1.9%        | 1.7%)         | 0.0%                                                                           | (-3.0%       | 2.3%)         | 0.0%                                                                                    | (-4.6%        | 4.6%)         |
| SkinBlood                                       | 0.1%                                                                        | (-1.0%        | 2.1%)         | 0.2%                                                                           | (-3.0%       | 4.9%)         | 0.0%                                                                                    | (-6.5%        | 6.4%)         |
| Zhang                                           | 0.0%                                                                        | (-1.6%        | 1.8%)         | -1.1%                                                                          | (-6.8%       | 2.2%)         | 0.3%                                                                                    | (-13.4%       | 7.5%)         |
| <b>Physiological functioning clocks</b>         |                                                                             |               |               |                                                                                |              |               |                                                                                         |               |               |
| PhenoAge                                        | <b>6.7%</b>                                                                 | <b>(1.6%</b>  | <b>15.0%)</b> | 1.9%                                                                           | (-2.2%       | 10.7%)        | 3.6%                                                                                    | (-5.4%        | 18.0%)        |
| GrimAge                                         | <b>25.7%**</b>                                                              | <b>(13.7%</b> | <b>40.3%)</b> | <b>18.7%**</b>                                                                 | <b>(4.3%</b> | <b>45.0%)</b> | <b>32.2%**</b>                                                                          | <b>(15.6%</b> | <b>80.2%)</b> |
| GrimAge2                                        | <b>28.9%**</b>                                                              | <b>(14.4%</b> | <b>46.8%)</b> | <b>23.3%**</b>                                                                 | <b>(8.5%</b> | <b>53.4%)</b> | <b>32.6%**</b>                                                                          | <b>(13.8%</b> | <b>82.8%)</b> |
| <b>Pace of aging clock</b>                      |                                                                             |               |               |                                                                                |              |               |                                                                                         |               |               |
| DunedinPoAm                                     | <b>15.1%**</b>                                                              | <b>(5.4%</b>  | <b>28.8%)</b> | 11.5%                                                                          | (-1.1%       | 28.6%)        | <b>25.0%</b>                                                                            | <b>(8.9%</b>  | <b>60.0%)</b> |
| <b>Clocks trained on other aging biomarkers</b> |                                                                             |               |               |                                                                                |              |               |                                                                                         |               |               |
| Yang                                            | -0.2%                                                                       | (-4.3%        | 3.5%)         | 0.2%                                                                           | (-5.0%       | 6.2%)         | 0.1%                                                                                    | (-3.4%        | 4.9%)         |
| Telomere                                        | 4.3%                                                                        | (-0.1%        | 11.1%)        | 5.0%                                                                           | (-2.7%       | 15.2%)        | 1.8%                                                                                    | (-5.2%        | 12.7%)        |
| <b>Behavioral/Lifestyle measures</b>            |                                                                             |               |               |                                                                                |              |               |                                                                                         |               |               |
| Sedentary behavior                              | 6.3%                                                                        | (-2.7%        | 16.8%)        | <b>23.6%</b>                                                                   | <b>(5.8%</b> | <b>50.3%)</b> | 5.8%                                                                                    | (-2.7%        | 26.9%)        |
| Healthy eating index                            | 3.0%                                                                        | (-12.2%       | 21.4%)        | 0.2%                                                                           | (-21.6%      | 18.1%)        | 4.5%                                                                                    | (-4.7%        | 17.7%)        |
| Smoking pack years                              | <b>12.9%**</b>                                                              | <b>(5.2%</b>  | <b>25.5%)</b> | <b>12.9%**</b>                                                                 | <b>(4.1%</b> | <b>29.4%)</b> | <b>22.1%**</b>                                                                          | <b>(7.8%</b>  | <b>66.7%)</b> |
| Alcohol drinker                                 | 1.1%                                                                        | (-5.2%        | 8.4%)         | -2.2%                                                                          | (-10.9%      | 7.9%)         | <b>6.8%</b>                                                                             | <b>(0.1%</b>  | <b>29.2%)</b> |
| <b>Anthropometric measures</b>                  |                                                                             |               |               |                                                                                |              |               |                                                                                         |               |               |
| Waist to thigh ratio                            | <b>6.7%</b>                                                                 | <b>(0.7%</b>  | <b>15.8%)</b> | 7.0%                                                                           | (-1.0%       | 18.6%)        | <b>13.8%</b>                                                                            | <b>(0.4%</b>  | <b>37.9%)</b> |
| BMI                                             | 0.1%                                                                        | (-2.9%        | 3.6%)         | -0.1%                                                                          | (-12.5%      | 10.1%)        | 10.8%                                                                                   | (-6.3%        | 57.0%)        |
| <b>Clinical used blood Biomarkers</b>           |                                                                             |               |               |                                                                                |              |               |                                                                                         |               |               |
| Total cholesterol                               | 0.0%                                                                        | (-2.3%        | 2.0%)         | 2.7%                                                                           | (-9.5%       | 14.8%)        | -1.7%                                                                                   | (-18.1%       | 4.1%)         |
| HDL                                             | -1.1%                                                                       | (-8.6%        | 3.2%)         | -1.6%                                                                          | (-12.8%      | 4.6%)         | -1.9%                                                                                   | (-11.8%       | 14.0%)        |
| LDL                                             | 0.0%                                                                        | (-1.9%        | 2.1%)         | 2.3%                                                                           | (-12.5%      | 15.1%)        | -3.2%                                                                                   | (-17.6%       | 3.0%)         |
| Glucose                                         | <b>3.3%</b>                                                                 | <b>(0.6%</b>  | <b>8.5%)</b>  | -0.4%                                                                          | (-7.6%       | 5.8%)         | 0.0%                                                                                    | (-4.7%        | 2.8%)         |
| C-reactive protein                              | 1.2%                                                                        | (-2.6%        | 5.8%)         | -0.6%                                                                          | (-6.9%       | 4.3%)         | -0.6%                                                                                   | (-9.0%        | 4.8%)         |

**Supplementary Table 19. Average mediated proportions for DNA methylation and clinical mediators on the relationship between household income and all-cause mortality among women of NHANES 1999-2002 (n=1,172). Bold indicates statistical significance (p-value<0.05), and bold with two asterisks indicates significance passed Bonferroni adjustment (p-value<0.0021).**

|                                                 | Model 1. PIR<1 (N=202)<br>vs. PIR 5+ (N= 175) |                      | Model 2. PIR 1-2 (N=355)<br>vs. PIR 5+ (N=175) |                       | Model 3. PIR 2-5 (N=440)<br>vs. PIR 5+ (N=175) |                     |
|-------------------------------------------------|-----------------------------------------------|----------------------|------------------------------------------------|-----------------------|------------------------------------------------|---------------------|
|                                                 | Average mediated proportion                   | (95% CI)             | Average mediated proportion                    | (95% CI)              | Average mediated proportion                    | (95% CI)            |
| <b>Chronological age clocks</b>                 |                                               |                      |                                                |                       |                                                |                     |
| Hannum                                          | 4.2%                                          | (-6.0% 18.0%)        | 4.6%                                           | (-14.2% 32.9%)        | 0.0%                                           | (-276.5% 257.1%)    |
| Hovarth                                         | -0.2%                                         | (-8.2% 4.9%)         | 1.7%                                           | (-23.4% 26.4%)        | 0.2%                                           | (-82.7% 75.4%)      |
| Weidner                                         | 0.9%                                          | (-3.4% 7.9%)         | 1.9%                                           | (-32.3% 30.7%)        | 0.5%                                           | (-71.0% 102.8%)     |
| Lin                                             | 0.9%                                          | (-5.6% 9.9%)         | -1.4%                                          | (-17.7% 12.3%)        | 0.3%                                           | (-127.4% 89.0%)     |
| Vidal-Bralo                                     | -2.5%                                         | (-16.6% 1.2%)        | 6.8%                                           | (-19.5% 45.8%)        | -0.1%                                          | (-93.6% 99.4%)      |
| SkinBlood                                       | -3.4%                                         | (-22.5% 1.2%)        | -0.7%                                          | (-19.2% 10.8%)        | -0.4%                                          | (-65.4% 61.6%)      |
| Zhang                                           | -3.1%                                         | (-21.0% 3.7%)        | -2.6%                                          | (-36.5% 10.6%)        | 0.1%                                           | (-53.9% 59.4%)      |
| <b>Physiological functioning clocks</b>         |                                               |                      |                                                |                       |                                                |                     |
| PhenoAge                                        | 4.2%                                          | (-2.4% 20.5%)        | 19.8%                                          | (-9.0% 97.8%)         | 2.0%                                           | (-287.1% 178.2%)    |
| GrimAge                                         | <b>47.7%**</b>                                | <b>(23.5% 86.2%)</b> | <b>43.4%</b>                                   | <b>(11.0% 265.5%)</b> | 44.9%                                          | (-800.3% 1444.1%)   |
| GrimAge2                                        | <b>48.1%**</b>                                | <b>(22.9% 85.7%)</b> | <b>51.6%</b>                                   | <b>(18.6% 221.3%)</b> | 51.3%                                          | (-1,069.7% 1073.6%) |
| <b>Pace of aging clock</b>                      |                                               |                      |                                                |                       |                                                |                     |
| DunedinPoAm                                     | <b>21.4%</b>                                  | <b>(5.5% 50.5%)</b>  | 22.4%                                          | (-16.8% 100.7%)       | 19.2%                                          | (-549.2% 536.7%)    |
| <b>Clocks trained on other aging biomarkers</b> |                                               |                      |                                                |                       |                                                |                     |
| Yang                                            | -0.1%                                         | (-11.5% 7.7%)        | 0.0%                                           | (-13.8% 6.5%)         | 0.2%                                           | (-62.8% 92.7%)      |
| Telomere                                        | 2.8%                                          | (-2.1% 12.8%)        | 6.4%                                           | (-15.3% 49.2%)        | 3.6%                                           | (-211.3% 328.8%)    |
| <b>Behavioral/Lifestyle measures</b>            |                                               |                      |                                                |                       |                                                |                     |
| Sedentary behavior                              | 19.5%                                         | (-9.2% 62.4%)        | 27.9%                                          | (-32.2% 214.1%)       | 8.5%                                           | (-412.4% 514.2%)    |
| Healthy eating index                            | 7.6%                                          | (-25.7% 39.3%)       | -1.2%                                          | (-33.9% 27.1%)        | -3.4%                                          | (-169.2% 173.0%)    |
| Smoking pack years                              | <b>16.9%**</b>                                | <b>(6.1% 36.0%)</b>  | 13.1%                                          | (-15.8% 104.0%)       | 10.5%                                          | (-188.8% 248.2%)    |
| Alcohol drinker                                 | -6.7%                                         | (-46.2% 18.1%)       | 19.3%                                          | (-34.5% 195.8%)       | 1.6%                                           | (-314.5% 240.9%)    |
| <b>Anthropometric measures</b>                  |                                               |                      |                                                |                       |                                                |                     |
| Waist to thigh ratio                            | 1.2%                                          | (-15.4% 13.7%)       | 10.2%                                          | (-49.8% 86.7%)        | 2.4%                                           | (-309.0% 287.5%)    |
| BMI                                             | -1.7%                                         | (-30.0% 17.9%)       | 11.9%                                          | (-27.1% 62.9%)        | 2.7%                                           | (-189.6% 266.2%)    |
| <b>Clinical used blood Biomarkers</b>           |                                               |                      |                                                |                       |                                                |                     |
| Total cholesterol                               | -0.1%                                         | (-6.3% 3.2%)         | 0.0%                                           | (-11.4% 9.4%)         | -1.2%                                          | (-127.9% 117.1%)    |
| HDL                                             | -7.2%                                         | (-35.8% 12.9%)       | 8.5%                                           | (-33.1% 56.3%)        | 3.8%                                           | (-221.5% 189.4%)    |
| LDL                                             | -3.3%                                         | (-15.9% 2.9%)        | 0.1%                                           | (-13.5% 13.3%)        | -1.1%                                          | (-204.1% 179.6%)    |
| Glucose                                         | <b>7.0%</b>                                   | <b>(-0.7% 24.1%)</b> | 4.1%                                           | (-25.9% 65.3%)        | -14.7%                                         | (-565.7% 526.1%)    |
| C-reactive protein                              | <b>1.4%</b>                                   | <b>(-0.6% 5.1%)</b>  | 11.7%                                          | (-55.4% 85.2%)        | 0.8%                                           | (-141.9% 114.4%)    |

**Supplementary Table 20. Average mediated proportions for DNA methylation and clinical mediators on the relationship between household income and all-cause mortality among men of NHANES 1999-2002 (n=1,230). Bold indicates statistical significance (p-value<0.05), and bold with two asterisks indicates significance passed Bonferroni adjustment (p-value<0.0021).**

|                                                 | Model 1. PIR<1 (N=171)<br>vs. PIR 5+ (N=224) |                      | Model 2. PIR 1-2 (N=352)<br>vs. PIR 5+ (N=224) |                      | Model 3. PIR 2-5 (N=483)<br>vs. PIR 5+ (N=224) |                     |
|-------------------------------------------------|----------------------------------------------|----------------------|------------------------------------------------|----------------------|------------------------------------------------|---------------------|
|                                                 | Average mediated<br>proportion               | (95% CI)             | Average mediated<br>proportion                 | (95% CI)             | Average mediated<br>proportion                 | (95% CI)            |
| <b>Chronological age clocks</b>                 |                                              |                      |                                                |                      |                                                |                     |
| Hannum                                          | 1.9%                                         | (-1.0% 7.1%)         | 1.8%                                           | (-0.7% 5.4%)         | -1.9%                                          | (-8.4% 1.3%)        |
| Hovarth                                         | 0.3%                                         | (-1.1% 3.6%)         | -0.5%                                          | (-3.1% 1.2%)         | -1.2%                                          | (-6.9% 2.3%)        |
| Weidner                                         | -0.3%                                        | (-5.5% 2.5%)         | 0.0%                                           | (-0.9% 1.1%)         | 0.0%                                           | (-2.4% 2.4%)        |
| Lin                                             | 0.0%                                         | (-2.7% 3.1%)         | -0.1%                                          | (-1.9% 1.1%)         | -1.1%                                          | (-5.9% 0.9%)        |
| Vidal-Bralo                                     | 0.1%                                         | (-1.9% 3.0%)         | -0.1%                                          | (-2.0% 1.1%)         | -0.5%                                          | (-4.8% 1.4%)        |
| SkinBlood                                       | -0.5%                                        | (-7.9% 4.5%)         | 0.0%                                           | (-0.8% 0.8%)         | -0.9%                                          | (-6.2% 2.1%)        |
| Zhang                                           | -0.1%                                        | (-4.2% 2.8%)         | -0.2%                                          | (-1.5% 0.5%)         | -1.6%                                          | (-7.1% 2.0%)        |
| <b>Physiological functioning clocks</b>         |                                              |                      |                                                |                      |                                                |                     |
| PhenoAge                                        | <b>7.1%</b>                                  | <b>(1.1% 15.9%)</b>  | <b>4.1%</b>                                    | <b>(0.7% 9.0%)</b>   | 1.5%                                           | (-2.8% 9.7%)        |
| GrimAge                                         | <b>19.3%**</b>                               | <b>(9.4% 32.5%)</b>  | <b>18.9%**</b>                                 | <b>(10.6% 31.7%)</b> | 12.0%                                          | (-1.1% 34.2%)       |
| GrimAge2                                        | <b>24.4%**</b>                               | <b>(13.3% 40.3%)</b> | <b>21.7%**</b>                                 | <b>(10.8% 35.8%)</b> | 13.0%                                          | (-0.5% 35.8%)       |
| <b>Pace of aging clock</b>                      |                                              |                      |                                                |                      |                                                |                     |
| DunedinPoAm                                     | <b>13.7%**</b>                               | <b>(4.5% 27.2%)</b>  | <b>11.4%**</b>                                 | <b>(4.5% 22.8%)</b>  | 9.2%                                           | (-0.0% 27.7%)       |
| <b>Clocks trained on other aging biomarkers</b> |                                              |                      |                                                |                      |                                                |                     |
| Yang                                            | -0.3%                                        | (-6.1% 4.6%)         | 3.0%                                           | (-0.1% 8.4%)         | 0.0%                                           | (-3.0% 2.5%)        |
| Telomere                                        | 0.8%                                         | (-4.1% 7.4%)         | <b>4.3%</b>                                    | <b>(0.2% 10.5%)</b>  | 1.1%                                           | (-5.1% 8.4%)        |
| <b>Behavioral/Lifestyle measures</b>            |                                              |                      |                                                |                      |                                                |                     |
| Sedentary behavior                              | <b>20.6%**</b>                               | <b>(6.4% 37.8%)</b>  | <b>7.2%</b>                                    | <b>(0.5% 15.8%)</b>  | 7.0%                                           | (-0.4% 24.5%)       |
| Healthy eating index                            | 2.7%                                         | (-5.9% 13.5%)        | 4.0%                                           | (-3.7% 11.4%)        | 2.6%                                           | (-4.1% 16.3%)       |
| Smoking pack years                              | 4.0%                                         | (-1.4% 10.1%)        | <b>10.6%**</b>                                 | <b>(4.4% 19.4%)</b>  | <b>11.3%**</b>                                 | <b>(3.6% 27.6%)</b> |
| Alcohol drinker                                 | 2.2%                                         | (-3.7% 9.9%)         | -1.9%                                          | (-9.1% 3.9%)         | 2.6%                                           | (-8.3% 15.3%)       |
| <b>Anthropometric measures</b>                  |                                              |                      |                                                |                      |                                                |                     |
| Waist to thigh ratio                            | <b>9.5%</b>                                  | <b>(1.4% 20.9%)</b>  | 5.5%                                           | (-0.4% 13.1%)        | 6.5%                                           | (-0.2% 17.4%)       |
| BMI                                             | 0.6%                                         | (-4.7% 7.7%)         | <b>-4.0%</b>                                   | <b>(-9.5% -0.8%)</b> | 2.0%                                           | (-3.4% 13.4%)       |
| <b>Clinical used blood Biomarkers</b>           |                                              |                      |                                                |                      |                                                |                     |
| Total cholesterol                               | 0.3%                                         | (-5.9% 8.3%)         | 1.0%                                           | (-2.1% 6.9%)         | -0.8%                                          | (-7.2% 3.4%)        |
| HDL                                             | 1.2%                                         | (-4.2% 7.2%)         | -0.8%                                          | (-6.2% 1.8%)         | 0.1%                                           | (-6.4% 7.7%)        |
| LDL                                             | 0.0%                                         | (-5.2% 4.2%)         | 0.5%                                           | (-2.0% 4.7%)         | -1.7%                                          | (-11.1% 2.3%)       |
| Glucose                                         | <b>6.1%</b>                                  | <b>(0.7% 14.5%)</b>  | 0.5%                                           | (-0.6% 2.8%)         | 0.0%                                           | (-1.9% 3.0%)        |
| C-reactive protein                              | <b>4.3%</b>                                  | <b>(0.6% 10.6%)</b>  | 2.6%                                           | (0.0% 6.7%)          | 1.6%                                           | (-0.5% 6.6%)        |

Supplementary Table 21. Average mediated proportions for DNA methylation and clinical mediators on the relationship between occupation status and all-cause mortality among women of NHANES 1999-2002 (n=1,172). Bold indicates statistical significance (p-value<0.05), and bold with two asterisks indicates significance passed Bonferroni adjustment (p-value<0.0021).

Supplementary Table 22. Average mediated proportions for DNA methylation and clinical mediators on the relationship between occupation status and all-cause mortality among men of NHANES 1999-2002 (n=1,230). Bold indicates statistical significance (p-value<0.05), and bold with two asterisks indicates significance passed Bonferroni adjustment (p-value<0.0021).

Supplementary Table 23. Average mediated proportions for DNA methylation and clinical mediators on the relationship between education attainment and all-cause mortality among Black participants of NHANES 1999-2002 (n=516). Bold indicates statistical significance (p-value<0.05), and bold with two asterisks indicates significance passed Bonferroni adjustment (p-value<0.0021).

|                                                 | Model 1. Less than high school (N=259) vs. College degree or higher (N=64) |               |               | Model 2. High school graduate/GED (N=105) vs. College degree or higher (N=64) |              |                | Model 3. Some college or associates degree (N=88) vs. College degree or higher (N=64) |          |         |
|-------------------------------------------------|----------------------------------------------------------------------------|---------------|---------------|-------------------------------------------------------------------------------|--------------|----------------|---------------------------------------------------------------------------------------|----------|---------|
|                                                 | Average mediated proportion                                                | (95% CI)      |               | Average mediated proportion                                                   | (95% CI)     |                | Average mediated proportion                                                           | (95% CI) |         |
| <b>Chronological age clocks</b>                 |                                                                            |               |               |                                                                               |              |                |                                                                                       |          |         |
| Hannum                                          | <b>16.2%</b>                                                               | <b>(3.1%</b>  | <b>50.7%)</b> | <b>45.4%</b>                                                                  | <b>(8.0%</b> | <b>358.6%)</b> | 40.3%                                                                                 | (-592.4% | 671.8%) |
| Hovarth                                         | 2.4%                                                                       | (-3.3%        | 16.7%)        | 18.3%                                                                         | (-11.9%      | 77.7%)         | 10.4%                                                                                 | (-172.7% | 219.2%) |
| Weidner                                         | 0.3%                                                                       | (-3.0%        | 5.1%)         | 2.4%                                                                          | (-8.0%       | 20.3%)         | 6.9%                                                                                  | (-120.9% | 148.4%) |
| Lin                                             | 0.6%                                                                       | (-4.0%        | 9.8%)         | 7.7%                                                                          | (-14.2%      | 43.1%)         | 4.3%                                                                                  | (-72.6%  | 126.0%) |
| Vidal-Bralo                                     | 2.4%                                                                       | (-2.8%        | 15.3%)        | 7.7%                                                                          | (-22.8%      | 50.8%)         | 0.2%                                                                                  | (-61.9%  | 70.9%)  |
| SkinBlood                                       | 3.1%                                                                       | (-0.9%        | 14.1%)        | 16.0%                                                                         | (-15.0%      | 117.6%)        | 2.2%                                                                                  | (-215.5% | 177.3%) |
| Zhang                                           | 5.3%                                                                       | (-3.4%        | 23.5%)        | 10.3%                                                                         | (-19.1%      | 82.6%)         | 16.5%                                                                                 | (-377.7% | 283.9%) |
| <b>Physiological functioning clocks</b>         |                                                                            |               |               |                                                                               |              |                |                                                                                       |          |         |
| PhenoAge                                        | 7.6%                                                                       | (-1.4%        | 28.6%)        | 16.8%                                                                         | (-30.2%      | 120.6%)        | 4.8%                                                                                  | (-192.6% | 229.6%) |
| GrimAge                                         | <b>24.5%</b>                                                               | <b>(10.0%</b> | <b>65.6%)</b> | 22.6%                                                                         | (-21.4%      | 133.0%)        | 35.5%                                                                                 | (-409.4% | 414.5%) |
| GrimAge2                                        | <b>29.9%</b>                                                               | <b>(12.0%</b> | <b>86.5%)</b> | 30.2%                                                                         | (-13.6%      | 215.3%)        | 37.7%                                                                                 | (-344.5% | 432.1%) |
| <b>Pace of aging clock</b>                      |                                                                            |               |               |                                                                               |              |                |                                                                                       |          |         |
| DunedinPoAm                                     | <b>9.4%</b>                                                                | <b>(1.7%</b>  | <b>28.4%)</b> | 16.8%                                                                         | (-44.2%      | 124.8%)        | 40.8%                                                                                 | (-397.2% | 650.4%) |
| <b>Clocks trained on other aging biomarkers</b> |                                                                            |               |               |                                                                               |              |                |                                                                                       |          |         |
| Yang                                            | 1.6%                                                                       | (-1.6%        | 9.5%)         | 5.7%                                                                          | (-31.6%      | 66.2%)         | 0.5%                                                                                  | (-102.1% | 229.6%) |
| Telomere                                        | <b>18.0%</b>                                                               | <b>(5.2%</b>  | <b>55.6%)</b> | 55.5%                                                                         | (-95.0%      | 323.9%)        | 25.4%                                                                                 | (-556.8% | 517.2%) |
| <b>Behavioral/Lifestyle measures</b>            |                                                                            |               |               |                                                                               |              |                |                                                                                       |          |         |
| Sedentary behavior                              | 7.2%                                                                       | (-1.8%        | 38.4%)        | 9.3%                                                                          | (-4.3%       | 74.3%)         | 2.9%                                                                                  | (-180.9% | 183.6%) |
| Healthy eating index                            | <b>6.7%</b>                                                                | <b>(0.4%</b>  | <b>26.0%)</b> | 5.8%                                                                          | (-15.2%      | 78.5%)         | 17.1%                                                                                 | (-430.1% | 401.6%) |
| Smoking pack years                              | <b>4.4%</b>                                                                | <b>(0.8%</b>  | <b>18.8%)</b> | 6.3%                                                                          | (-49.7%      | 123.3%)        | 0.9%                                                                                  | (-140.8% | 162.7%) |
| Alcohol drinker                                 | 0.7%                                                                       | (-5.1%        | 9.9%)         | -2.6%                                                                         | (-56.4%      | 22.0%)         | -8.3%                                                                                 | (-234.8% | 198.1%) |
| <b>Anthropometric measures</b>                  |                                                                            |               |               |                                                                               |              |                |                                                                                       |          |         |
| Waist to thigh ratio                            | 8.6%                                                                       | (-0.6%        | 30.0%)        | 9.1%                                                                          | (-13.2%      | 61.3%)         | -2.9%                                                                                 | (-199.0% | 127.9%) |
| BMI                                             | 0.0%                                                                       | (-5.6%        | 5.0%)         | 0.3%                                                                          | (-17.9%      | 25.2%)         | 0.5%                                                                                  | (-155.6% | 150.3%) |
| <b>Clinical used blood Biomarkers</b>           |                                                                            |               |               |                                                                               |              |                |                                                                                       |          |         |
| Total cholesterol                               | -0.1%                                                                      | (-3.0%        | 2.0%)         | 2.8%                                                                          | (-17.4%      | 51.7%)         | 2.4%                                                                                  | (-78.5%  | 155.4%) |
| HDL                                             | 0.0%                                                                       | (-6.9%        | 6.0%)         | -4.3%                                                                         | (-37.1%      | 15.7%)         | -0.6%                                                                                 | (-123.2% | 153.3%) |
| LDL                                             | -0.4%                                                                      | (-4.3%        | 1.6%)         | 0.1%                                                                          | (-36.5%      | 39.8%)         | 0.2%                                                                                  | (-85.9%  | 107.6%) |
| Glucose                                         | -0.2%                                                                      | (-9.6%        | 5.6%)         | -4.8%                                                                         | (-55.3%      | 65.6%)         | 3.3%                                                                                  | (-180.6% | 288.1%) |
| C-reactive protein                              | 2.2%                                                                       | (-5.3%        | 19.4%)        | -14.3%                                                                        | (-189.0%     | 103.1%)        | 1.2%                                                                                  | (-88.4%  | 92.8%)  |

**Supplementary Table 24. Average mediated proportions for DNA methylation and clinical mediators on the relationship between education attainment and all-cause mortality among White participants of NHANES 1999-2002 (n=943). Bold indicates statistical significance (p-value<0.05), and bold with two asterisks indicates significance passed Bonferroni adjustment (p-value<0.0021).**

|                                                 | Model 1. Less than high school (N=193) vs. College degree or higher (N=237) |                      | Model 2. High school graduate/GED (N=285) vs. College degree or higher (N=237) |                     | Model 3. Some college or associates degree (N=228) vs. College degree or higher (N=237) |                        |
|-------------------------------------------------|-----------------------------------------------------------------------------|----------------------|--------------------------------------------------------------------------------|---------------------|-----------------------------------------------------------------------------------------|------------------------|
|                                                 | Average mediated proportion                                                 | (95% CI)             | Average mediated proportion                                                    | (95% CI)            | Average mediated proportion                                                             | (95% CI)               |
| <b>Chronological age clocks</b>                 |                                                                             |                      |                                                                                |                     |                                                                                         |                        |
| Hannum                                          | 1.6%                                                                        | (-0.6% 5.8%)         | 4.2%                                                                           | (-0.2% 14.7%)       | -0.3%                                                                                   | (-8.3% 6.4%)           |
| Hovarth                                         | -0.1%                                                                       | (-2.3% 1.7%)         | -1.3%                                                                          | (-8.9% 1.6%)        | <b>-3.2%</b>                                                                            | <b>(-10.6% - 0.1%)</b> |
| Weidner                                         | -0.2%                                                                       | (-4.3% 1.9%)         | 0.1%                                                                           | (-3.2% 3.9%)        | -0.4%                                                                                   | (-5.0% 1.8%)           |
| Lin                                             | 0.0%                                                                        | (-3.0% 2.3%)         | -1.5%                                                                          | (-6.8% 1.2%)        | 0.0%                                                                                    | (-5.5% 4.4%)           |
| Vidal-Bralo                                     | -0.2%                                                                       | (-3.6% 2.3%)         | -0.2%                                                                          | (-5.1% 2.6%)        | -0.2%                                                                                   | (-4.5% 2.9%)           |
| SkinBlood                                       | 0.5%                                                                        | (-1.6% 4.2%)         | 0.7%                                                                           | (-2.1% 5.9%)        | 0.0%                                                                                    | (-4.0% 3.3%)           |
| Zhang                                           | 0.8%                                                                        | (-1.2% 4.7%)         | 0.2%                                                                           | (-1.8% 3.5%)        | 0.1%                                                                                    | (-3.7% 4.1%)           |
| <b>Physiological functioning clocks</b>         |                                                                             |                      |                                                                                |                     |                                                                                         |                        |
| PhenoAge                                        | <b>6.8%</b>                                                                 | <b>(1.3% 16.1%)</b>  | 2.7%                                                                           | (-2.1% 12.5%)       | 1.4%                                                                                    | (-5.2% 9.6%)           |
| GrimAge                                         | <b>26.0%**</b>                                                              | <b>(12.9% 43.8%)</b> | <b>16.3%**</b>                                                                 | <b>(5.4% 40.2%)</b> | <b>31.5%**</b>                                                                          | <b>(16.9% 56.4%)</b>   |
| GrimAge2                                        | <b>28.7%**</b>                                                              | <b>(13.9% 47.8%)</b> | <b>18.1%**</b>                                                                 | <b>(7.0% 45.9%)</b> | <b>30.5%**</b>                                                                          | <b>(16.9% 55.8%)</b>   |
| <b>Pace of aging clock</b>                      |                                                                             |                      |                                                                                |                     |                                                                                         |                        |
| DunedinPoAm                                     | <b>13.2%**</b>                                                              | <b>(4.7% 26.2%)</b>  | <b>10.0%</b>                                                                   | <b>(1.2% 26.2%)</b> | <b>19.8%**</b>                                                                          | <b>(9.0% 35.1%)</b>    |
| <b>Clocks trained on other aging biomarkers</b> |                                                                             |                      |                                                                                |                     |                                                                                         |                        |
| Yang                                            | -1.7%                                                                       | (-6.8% 2.2%)         | 0.5%                                                                           | (-4.4% 6.4%)        | 0.4%                                                                                    | (-1.8% 5.1%)           |
| Telomere                                        | <b>10.7%</b>                                                                | <b>(3.7% 20.5%)</b>  | 5.5%                                                                           | <b>(1.1% 13.7%)</b> | 3.3%                                                                                    | (-1.0% 9.5%)           |
| <b>Behavioral/Lifestyle measures</b>            |                                                                             |                      |                                                                                |                     |                                                                                         |                        |
| Sedentary behavior                              | <b>11.5%</b>                                                                | <b>(3.0% 27.1%)</b>  | <b>19.0%**</b>                                                                 | <b>(7.7% 39.7%)</b> | 3.1%                                                                                    | (-4.8% 12.7%)          |
| Healthy eating index                            | -1.2%                                                                       | (-14.7% 20.4%)       | -1.5%                                                                          | (-21.9% 11.3%)      | 2.2%                                                                                    | (-7.9% 11.4%)          |
| Smoking pack years                              | <b>15.9%**</b>                                                              | <b>(6.0% 30.4%)</b>  | <b>11.1%**</b>                                                                 | <b>(3.1% 29.6%)</b> | <b>16.6%**</b>                                                                          | <b>(6.9% 32.7%)</b>    |
| Alcohol drinker                                 | 3.0%                                                                        | (-3.5% 12.0%)        | 6.2%                                                                           | (-0.3% 19.3%)       | 1.9%                                                                                    | (-4.4% 10.7%)          |
| <b>Anthropometric measures</b>                  |                                                                             |                      |                                                                                |                     |                                                                                         |                        |
| Waist to thigh ratio                            | <b>7.9%</b>                                                                 | <b>(1.1% 18.8%)</b>  | 3.1%                                                                           | (-4.5% 13.8%)       | 4.0%                                                                                    | (-1.8% 14.2%)          |
| BMI                                             | -0.9%                                                                       | (-11.4% 8.6%)        | 2.8%                                                                           | (-3.3% 13.4%)       | 2.8%                                                                                    | (-9.2% 18.9%)          |
| <b>Clinical used blood Biomarkers</b>           |                                                                             |                      |                                                                                |                     |                                                                                         |                        |
| Total cholesterol                               | 0.5%                                                                        | (-2.1% 5.0%)         | -0.8%                                                                          | (-20.2% 9.1%)       | -2.9%                                                                                   | (-16.9% 4.8%)          |
| HDL                                             | -0.1%                                                                       | (-9.5% 8.3%)         | 0.4%                                                                           | (-4.6% 6.9%)        | -0.1%                                                                                   | (-4.5% 3.1%)           |
| LDL                                             | 0.6%                                                                        | (-2.2% 5.0%)         | -0.4%                                                                          | (-17.8% 12.3%)      | -4.2%                                                                                   | (-15.6% 2.0%)          |
| Glucose                                         | 1.4%                                                                        | (-2.7% 8.4%)         | 0.9%                                                                           | (-2.1% 7.1%)        | -1.8%                                                                                   | (-10.7% 2.2%)          |
| C-reactive protein                              | 2.7%                                                                        | (-1.0% 7.6%)         | 0.6%                                                                           | (-4.0% 5.7%)        | 0.8%                                                                                    | (-3.6% 6.5%)           |

**Supplementary Table 25. Average mediated proportions for DNA methylation and clinical mediators on the relationship between education attainment and all-cause mortality among Hispanic participants of NHANES 1999-2002 (n=860). Bold indicates statistical significance (p-value<0.05), and bold with two asterisks indicates significance passed Bonferroni adjustment (p-value<0.0021).**

|                                                 | Model 1. Less than high school (N=617) vs. College degree or higher (N=48) |          |         | Model 2. High school graduate/GED (N=86) vs. College degree or higher (N=48) |          |         | Model 3. Some college or associates degree (N=109) vs. College degree or higher (N=48) |          |         |
|-------------------------------------------------|----------------------------------------------------------------------------|----------|---------|------------------------------------------------------------------------------|----------|---------|----------------------------------------------------------------------------------------|----------|---------|
|                                                 | Average mediated proportion                                                | (95% CI) |         | Average mediated proportion                                                  | (95% CI) |         | Average mediated proportion                                                            | (95% CI) |         |
| <b>Chronological age clocks</b>                 |                                                                            |          |         |                                                                              |          |         |                                                                                        |          |         |
| Hannum                                          | 0.0%                                                                       | (-19.5%  | 18.0%)  | 0.6%                                                                         | (-16.0%  | 26.9%)  | -0.5%                                                                                  | (-24.6%  | 26.8%)  |
| Hovarth                                         | 0.3%                                                                       | (-54.0%  | 40.7%)  | 12.5%                                                                        | (-69.7%  | 77.1%)  | 9.3%                                                                                   | (-32.4%  | 55.0%)  |
| Weidner                                         | 0.9%                                                                       | (-14.9%  | 18.4%)  | 7.3%                                                                         | (-28.3%  | 52.2%)  | 9.9%                                                                                   | (-50.2%  | 96.4%)  |
| Lin                                             | 1.1%                                                                       | (-42.7%  | 88.1%)  | 4.9%                                                                         | (-23.5%  | 67.8%)  | 2.3%                                                                                   | (-20.4%  | 30.2%)  |
| Vidal-Bralo                                     | 2.0%                                                                       | (-42.0%  | 39.3%)  | 4.5%                                                                         | (-41.0%  | 57.2%)  | 6.1%                                                                                   | (-9.4%   | 53.6%)  |
| SkinBlood                                       | -0.6%                                                                      | (-42.8%  | 55.1%)  | 1.0%                                                                         | (-19.3%  | 14.5%)  | -0.5%                                                                                  | (-31.9%  | 20.1%)  |
| Zhang                                           | 0.3%                                                                       | (-31.1%  | 33.8%)  | 5.6%                                                                         | (-27.5%  | 46.0%)  | 0.2%                                                                                   | (-51.4%  | 49.0%)  |
| <b>Physiological functioning clocks</b>         |                                                                            |          |         |                                                                              |          |         |                                                                                        |          |         |
| PhenoAge                                        | 1.5%                                                                       | (-32.4%  | 34.4%)  | 4.5%                                                                         | (-14.2%  | 30.5%)  | 1.3%                                                                                   | (-19.5%  | 19.1%)  |
| GrimAge                                         | 1.1%                                                                       | (-47.7%  | 56.3%)  | 0.1%                                                                         | (-24.2%  | 29.9%)  | -1.7%                                                                                  | (-130.7% | 138.5%) |
| GrimAge2                                        | 0.9%                                                                       | (-60.5%  | 69.9%)  | 0.1%                                                                         | (-21.7%  | 23.8%)  | -1.7%                                                                                  | (-107.2% | 79.9%)  |
| <b>Pace of aging clock</b>                      |                                                                            |          |         |                                                                              |          |         |                                                                                        |          |         |
| DunedinPoAm                                     | -0.1%                                                                      | (-31.6%  | 29.2%)  | -0.6%                                                                        | (-41.2%  | 35.8%)  | -3.3%                                                                                  | (-176.9% | 125.4%) |
| <b>Clocks trained on other aging biomarkers</b> |                                                                            |          |         |                                                                              |          |         |                                                                                        |          |         |
| Yang                                            | 0.0%                                                                       | (-17.0%  | 19.8%)  | 2.4%                                                                         | (-17.8%  | 44.5%)  | 8.0%                                                                                   | (-24.0%  | 41.1%)  |
| Telomere                                        | 1.9%                                                                       | (-21.2%  | 30.0%)  | 5.2%                                                                         | (-58.3%  | 60.9%)  | 8.8%                                                                                   | (-7.1%   | 41.1%)  |
| <b>Behavioral/Lifestyle measures</b>            |                                                                            |          |         |                                                                              |          |         |                                                                                        |          |         |
| Sedentary behavior                              | -8.2%                                                                      | (-124.0% | 123.7%) | -4.0%                                                                        | (-70.7%  | 21.9%)  | -11.2%                                                                                 | (-99.9%  | 9.9%)   |
| Healthy eating index                            | -4.7%                                                                      | (-65.3%  | 80.7%)  | -7.4%                                                                        | (-80.6%  | 66.8%)  | -2.7%                                                                                  | (-31.1%  | 18.4%)  |
| Smoking pack years                              | 0.1%                                                                       | (-28.7%  | 23.7%)  | -0.8%                                                                        | (-42.9%  | 26.2%)  | 0.2%                                                                                   | (-13.9%  | 38.2%)  |
| Alcohol drinker                                 | 0.0%                                                                       | (-115.8% | 111.1%) | -4.3%                                                                        | (-99.3%  | 77.4%)  | -1.1%                                                                                  | (-33.5%  | 23.5%)  |
| <b>Anthropometric measures</b>                  |                                                                            |          |         |                                                                              |          |         |                                                                                        |          |         |
| Waist to thigh ratio                            | -4.7%                                                                      | (-69.7%  | 59.2%)  | 0.9%                                                                         | (-31.9%  | 44.7%)  | 1.1%                                                                                   | (-14.1%  | 22.4%)  |
| BMI                                             | 1.4%                                                                       | (-43.7%  | 69.7%)  | 0.6%                                                                         | (-58.4%  | 61.1%)  | -1.8%                                                                                  | (-41.4%  | 35.4%)  |
| <b>Clinical used blood Biomarkers</b>           |                                                                            |          |         |                                                                              |          |         |                                                                                        |          |         |
| Total cholesterol                               | -0.4%                                                                      | (-59.7%  | 23.4%)  | 2.3%                                                                         | (-63.3%  | 95.1%)  | 0.4%                                                                                   | (-81.8%  | 90.4%)  |
| HDL                                             | -3.2%                                                                      | (-62.7%  | 45.2%)  | -0.1%                                                                        | (-28.4%  | 14.7%)  | -0.8%                                                                                  | (-36.5%  | 17.3%)  |
| LDL                                             | -0.7%                                                                      | (-42.8%  | 43.6%)  | 3.0%                                                                         | (-49.7%  | 78.0%)  | 0.2%                                                                                   | (-81.1%  | 101.3%) |
| Glucose                                         | -4.3%                                                                      | (-119.3% | 70.3%)  | -1.2%                                                                        | (-120.6% | 114.7%) | -2.4%                                                                                  | (-36.1%  | 27.1%)  |
| C-reactive protein                              | 0.1%                                                                       | (-5.7%   | 8.1%)   | 0.4%                                                                         | (-17.6%  | 15.7%)  | 0.6%                                                                                   | (-3.5%   | 8.3%)   |

**Supplementary Table 26. Average mediated proportions for DNA methylation and clinical mediators on the relationship between household income and all-cause mortality among Black participants of NHANES 1999-2002 (n=516). Bold indicates statistical significance (p-value<0.05), and bold with two asterisks indicates significance passed Bonferroni adjustment (p-value<0.0021).**

|                                                 | Model 1. PIR<1 (N=86)<br>vs. PIR 5+ (N=54) |                     | Model 2. PIR 1-2 (N=155)<br>vs. PIR 5+ (N=54) |                      | Model 3. PIR 2-5 (N=221)<br>vs. PIR 5+ (N=54) |                 |
|-------------------------------------------------|--------------------------------------------|---------------------|-----------------------------------------------|----------------------|-----------------------------------------------|-----------------|
|                                                 | Average mediated<br>proportion             | (95% CI)            | Average mediated<br>proportion                | (95% CI)             | Average mediated<br>proportion                | (95% CI)        |
| <b>Chronological age clocks</b>                 |                                            |                     |                                               |                      |                                               |                 |
| Hannum                                          | 2.9%                                       | (-8.0% 17.8%)       | 8.0%                                          | (-8.5% 28.4%)        | -4.5%                                         | (-89.1% 34.9%)  |
| Hovarth                                         | -2.4%                                      | (-26.7% 7.7%)       | 3.9%                                          | (-7.2% 30.9%)        | -0.6%                                         | (-105.6% 44.2%) |
| Weidner                                         | 0.2%                                       | (-2.9% 7.8%)        | 0.1%                                          | (-5.2% 7.0%)         | 1.0%                                          | (-17.2% 26.6%)  |
| Lin                                             | -0.5%                                      | (-13.8% 6.2%)       | -0.9%                                         | (-17.7% 10.9%)       | -0.5%                                         | (-32.9% 22.3%)  |
| Vidal-Bralo                                     | 0.6%                                       | (-2.9% 8.2%)        | -1.4%                                         | (-15.5% 5.4%)        | -0.5%                                         | (-12.0% 3.2%)   |
| SkinBlood                                       | 0.0%                                       | (-7.4% 6.8%)        | 2.4%                                          | (-3.7% 17.7%)        | 1.6%                                          | (-34.0% 26.7%)  |
| Zhang                                           | 0.7%                                       | (-10.4% 13.7%)      | 4.4%                                          | (-5.2% 26.3%)        | 1.0%                                          | (-27.0% 31.1%)  |
| <b>Physiological functioning clocks</b>         |                                            |                     |                                               |                      |                                               |                 |
| PhenoAge                                        | 1.1%                                       | (-3.9% 13.3%)       | 6.1%                                          | (-6.6% 26.4%)        | -4.5%                                         | (-90.5% 19.4%)  |
| GrimAge                                         | <b>17.6%**</b>                             | <b>(6.7% 43.2%)</b> | <b>23.5%</b>                                  | <b>(8.0% 75.6%)</b>  | 7.2%                                          | (-15.9% 42.8%)  |
| GrimAge2                                        | <b>20.6%**</b>                             | <b>(8.7% 42.1%)</b> | <b>28.8%</b>                                  | <b>(13.4% 78.5%)</b> | 7.1%                                          | (-18.7% 52.8%)  |
| <b>Pace of aging clock</b>                      |                                            |                     |                                               |                      |                                               |                 |
| DunedinPoAm                                     | 0.0%                                       | (-5.4% 4.9%)        | 7.7%                                          | (-5.5% 25.7%)        | -2.1%                                         | (-36.1% 18.6%)  |
| <b>Clocks trained on other aging biomarkers</b> |                                            |                     |                                               |                      |                                               |                 |
| Yang                                            | 0.9%                                       | (-3.7% 8.6%)        | 0.5%                                          | (-4.0% 9.0%)         | 0.2%                                          | (-8.6% 12.5%)   |
| Telomere                                        | <b>10.8%</b>                               | <b>(2.7% 26.0%)</b> | <b>9.2%</b>                                   | <b>(0.9% 29.5%)</b>  | 6.2%                                          | (-20.5% 47.0%)  |
| <b>Behavioral/Lifestyle measures</b>            |                                            |                     |                                               |                      |                                               |                 |
| Sedentary behavior                              | -3.7%                                      | (-24.8% 12.9%)      | 4.1%                                          | (-7.9% 30.7%)        | 10.0%                                         | (-22.4% 69.4%)  |
| Healthy eating index                            | -1.0%                                      | (-9.6% 6.0%)        | -0.7%                                         | (-8.0% 2.1%)         | -7.6%                                         | (-58.1% 14.2%)  |
| Smoking pack years                              | <b>3.1%</b>                                | <b>(0.4% 8.4%)</b>  | 1.4%                                          | (-2.5% 10.6%)        | 3.3%                                          | (-5.3% 23.3%)   |
| Alcohol drinker                                 | -1.8%                                      | (-13.7% 13.4%)      | 0.8%                                          | (-5.7% 12.8%)        | 0.0%                                          | (-24.8% 23.1%)  |
| <b>Anthropometric measures</b>                  |                                            |                     |                                               |                      |                                               |                 |
| Waist to thigh ratio                            | 6.1%                                       | (-0.5% 23.8%)       | <b>12.6%</b>                                  | <b>(1.0% 57.5%)</b>  | 0.1%                                          | (-18.3% 12.2%)  |
| BMI                                             | -1.6%                                      | (-30.3% 7.1%)       | 0.1%                                          | (-13.0% 12.0%)       | -0.1%                                         | (-18.9% 14.1%)  |
| <b>Clinical used blood Biomarkers</b>           |                                            |                     |                                               |                      |                                               |                 |
| Total cholesterol                               | 1.4%                                       | (-12.6% 16.7%)      | -0.7%                                         | (-9.9% 4.4%)         | -0.3%                                         | (-21.0% 13.3%)  |
| HDL                                             | -1.8%                                      | (-19.1% 4.5%)       | -4.3%                                         | (-47.8% 6.7%)        | 0.0%                                          | (-16.0% 14.1%)  |
| LDL                                             | 1.3%                                       | (-8.3% 17.3%)       | -1.8%                                         | (-15.5% 5.0%)        | -1.9%                                         | (-37.1% 6.9%)   |
| Glucose                                         | 1.3%                                       | (-5.8% 17.2%)       | 0.2%                                          | (-5.7% 6.4%)         | -0.4%                                         | (-16.6% 11.7%)  |
| C-reactive protein                              | -1.5%                                      | (-13.2% 9.2%)       | -0.3%                                         | (-10.4% 10.3%)       | -0.2%                                         | (-13.0% 8.9%)   |

**Supplementary Table 27. Average mediated proportions for DNA methylation and clinical mediators on the relationship between household income and all-cause mortality among White participants of NHANES 1999-2002 (n=943). Bold indicates statistical significance (p-value<0.05), and bold with two asterisks indicates significance passed Bonferroni adjustment (p-value<0.0021).**

|                                                 | Model 1. PIR<1 (N=69)<br>vs. PIR 5+ (N=261) |                      | Model 2. PIR 1-2 (N=184)<br>vs. PIR 5+ (N=261) |                      | Model 3. PIR 2-5 (N=429)<br>vs. PIR 5+ (N= 261) |                      |
|-------------------------------------------------|---------------------------------------------|----------------------|------------------------------------------------|----------------------|-------------------------------------------------|----------------------|
|                                                 | Average mediated<br>proportion              | (95% CI)             | Average mediated<br>proportion                 | (95% CI)             | Average mediated<br>proportion                  | (95% CI)             |
| <b>Chronological age clocks</b>                 |                                             |                      |                                                |                      |                                                 |                      |
| Hannum                                          | 4.4%                                        | (-0.9% 15.9%)        | 3.5%                                           | (-0.4% 9.4%)         | 0.2%                                            | (-8.8% 9.8%)         |
| Hovarth                                         | -0.2%                                       | (-5.9% 5.7%)         | 1.0%                                           | (-3.1% 5.5%)         | -0.6%                                           | (-8.5% 4.2%)         |
| Weidner                                         | -0.1%                                       | (-3.9% 2.9%)         | 1.8%                                           | (-0.9% 5.7%)         | 0.0%                                            | (-2.8% 2.3%)         |
| Lin                                             | 0.1%                                        | (-3.9% 4.8%)         | -0.5%                                          | (-2.9% 0.9%)         | -1.4%                                           | (-12.6% 2.6%)        |
| Vidal-Bralo                                     | 0.4%                                        | (-2.5% 7.1%)         | 2.2%                                           | (-0.6% 7.1%)         | 0.2%                                            | (-2.9% 4.4%)         |
| SkinBlood                                       | 0.0%                                        | (-6.0% 4.6%)         | 0.0%                                           | (-2.3% 2.3%)         | -1.7%                                           | (-9.1% 2.8%)         |
| Zhang                                           | 0.0%                                        | (-3.6% 3.9%)         | -0.2%                                          | (-2.1% 1.2%)         | -1.9%                                           | (-10.2% 2.1%)        |
| <b>Physiological functioning clocks</b>         |                                             |                      |                                                |                      |                                                 |                      |
| PhenoAge                                        | <b>8.7%</b>                                 | <b>(0.2% 29.6%)</b>  | <b>9.2%</b>                                    | <b>(1.8% 21.3%)</b>  | 4.8%                                            | (-1.4% 19.4%)        |
| GrimAge                                         | <b>38.5%**</b>                              | <b>(19.1% 64.4%)</b> | <b>28.2%**</b>                                 | <b>(14.4% 55.6%)</b> | <b>25.9%**</b>                                  | <b>(6.2% 79.0%)</b>  |
| GrimAge2                                        | <b>41.7%**</b>                              | <b>(21.8% 71.1%)</b> | <b>31.0%**</b>                                 | <b>(16.8% 60.1%)</b> | <b>28.4%**</b>                                  | <b>(10.5% 95.1%)</b> |
| <b>Pace of aging clock</b>                      |                                             |                      |                                                |                      |                                                 |                      |
| DunedinPoAm                                     | <b>25.2%**</b>                              | <b>(6.4% 53.4%)</b>  | <b>15.2%**</b>                                 | <b>(4.1% 38.8%)</b>  | <b>16.7%</b>                                    | <b>(4.1% 58.6%)</b>  |
| <b>Clocks trained on other aging biomarkers</b> |                                             |                      |                                                |                      |                                                 |                      |
| Yang                                            | 0.6%                                        | (-4.0% 8.5%)         | 0.8%                                           | (-1.5% 5.3%)         | 0.0%                                            | (-4.0% 5.1%)         |
| Telomere                                        | 3.9%                                        | (-4.5% 14.5%)        | <b>8.9%**</b>                                  | <b>(2.9% 20.8%)</b>  | <b>6.1%</b>                                     | <b>(0.8% 20.4%)</b>  |
| <b>Behavioral/Lifestyle measures</b>            |                                             |                      |                                                |                      |                                                 |                      |
| Sedentary behavior                              | <b>29.0%</b>                                | <b>(6.1% 63.3%)</b>  | <b>12.8%</b>                                   | <b>(2.8% 41.8%)</b>  | 12.0%                                           | (-0.8% 56.8%)        |
| Healthy eating index                            | 1.9%                                        | (-21.4% 25.3%)       | 3.9%                                           | (-3.2% 18.3%)        | 1.2%                                            | (-7.8% 20.5%)        |
| Smoking pack years                              | <b>15.4%**</b>                              | <b>(5.3% 30.5%)</b>  | <b>17.1%**</b>                                 | <b>(6.4% 42.4%)</b>  | <b>17.1%**</b>                                  | <b>(6.0% 55.7%)</b>  |
| Alcohol drinker                                 | -8.0%                                       | (-33.1% 8.5%)        | 3.0%                                           | (-14.5% 18.8%)       | 7.3%                                            | (-0.6% 24.8%)        |
| <b>Anthropometric measures</b>                  |                                             |                      |                                                |                      |                                                 |                      |
| Waist to thigh ratio                            | 2.6%                                        | (-15.5% 15.2%)       | 4.7%                                           | (-7.1% 17.5%)        | <b>12.4%</b>                                    | <b>(1.9% 35.2%)</b>  |
| BMI                                             | -1.0%                                       | (-14.9% 13.2%)       | -2.0%                                          | (-19.9% 6.5%)        | 1.1%                                            | (-19.7% 20.3%)       |
| <b>Clinical used blood Biomarkers</b>           |                                             |                      |                                                |                      |                                                 |                      |
| Total cholesterol                               | 0.2%                                        | (-6.4% 8.3%)         | 1.4%                                           | (-1.9% 9.8%)         | 0.0%                                            | (-6.0% 8.7%)         |
| HDL                                             | -5.8%                                       | (-21.7% 6.4%)        | 1.2%                                           | (-8.0% 11.2%)        | 1.4%                                            | (-8.3% 14.2%)        |
| LDL                                             | -2.2%                                       | (-16.3% 6.2%)        | 1.2%                                           | (-2.6% 8.9%)         | -0.6%                                           | (-10.3% 11.2%)       |
| Glucose                                         | 4.7%                                        | (-0.4% 14.3%)        | 0.3%                                           | (-3.6% 6.6%)         | 4.8%                                            | (-1.9% 20.1%)        |
| C-reactive protein                              | <b>9.0%</b>                                 | <b>(1.1% 21.7%)</b>  | <b>6.6%</b>                                    | <b>(1.1% 15.6%)</b>  | 2.3%                                            | (-0.9% 13.3%)        |

**Supplementary Table 28. Average mediated proportions for DNA methylation and clinical mediators on the relationship between household income and all-cause mortality among Hispanic participants of NHANES 1999-2002 (n=860). Bold indicates statistical significance (p-value<0.05), and bold with two asterisks indicates significance passed Bonferroni adjustment (p-value<0.0021).**

|                                                 | Model 1. PIR<1 (N=198)<br>vs. PIR 5+ (N=66) |                 | Model 2. PIR 1-2 (N=355)<br>vs. PIR 5+ (N=66) |                 | Model 3. PIR 2-5 (N=241)<br>vs. PIR 5+ (N=66) |                 |
|-------------------------------------------------|---------------------------------------------|-----------------|-----------------------------------------------|-----------------|-----------------------------------------------|-----------------|
|                                                 | Average mediated proportion                 | (95% CI)        | Average mediated proportion                   | (95% CI)        | Average mediated proportion                   | (95% CI)        |
| <b>Chronological age clocks</b>                 |                                             |                 |                                               |                 |                                               |                 |
| Hannum                                          | 0.3%                                        | (-104.5%130.4%) | 0.0%                                          | (-38.9% 27.4%)  | 0.5%                                          | (-51.5% 54.5%)  |
| Hovarth                                         | 2.9%                                        | (-76.2% 107.5%) | 0.1%                                          | (-60.9% 87.3%)  | 0.4%                                          | (-28.7% 51.4%)  |
| Weidner                                         | 2.9%                                        | (-36.8% 54.4%)  | 0.3%                                          | (-128.7% 66.8%) | 3.5%                                          | (-66.8% 90.7%)  |
| Lin                                             | 2.2%                                        | (-303.7%231.7%) | -1.0%                                         | (-55.3% 50.8%)  | 1.0%                                          | (-46.4% 41.8%)  |
| Vidal-Bralo                                     | 10.0%                                       | (-152.6%170.5%) | -9.1%                                         | (-236.8%184.4%) | 4.1%                                          | (-151.3%124.7%) |
| SkinBlood                                       | 0.2%                                        | (-55.8% 52.4%)  | -0.1%                                         | (-28.7% 19.8%)  | 0.8%                                          | (-108.2% 56.8%) |
| Zhang                                           | -0.3%                                       | (-133.3%127.1%) | 0.4%                                          | (-34.2% 31.3%)  | 0.5%                                          | (-40.8% 54.3%)  |
| <b>Physiological functioning clocks</b>         |                                             |                 |                                               |                 |                                               |                 |
| PhenoAge                                        | 1.0%                                        | (-42.5% 66.1%)  | 3.8%                                          | (-105.2% 86.9%) | 0.3%                                          | (-60.3% 64.5%)  |
| GrimAge                                         | 2.5%                                        | (-35.5% 53.1%)  | 2.2%                                          | (-78.1% 87.2%)  | 0.2%                                          | (-65.1% 66.0%)  |
| GrimAge2                                        | 1.0%                                        | (-44.5% 54.9%)  | 4.6%                                          | (-163.5%163.6%) | -0.1%                                         | (-73.7% 55.7%)  |
| <b>Pace of aging clock</b>                      |                                             |                 |                                               |                 |                                               |                 |
| DunedinPoAm                                     | -3.7%                                       | (-184.1%130.8%) | 0.4%                                          | (-70.0% 77.1%)  | 0.1%                                          | (-55.4% 68.9%)  |
| <b>Clocks trained on other aging biomarkers</b> |                                             |                 |                                               |                 |                                               |                 |
| Yang                                            | 0.0%                                        | (-86.4% 55.6%)  | 2.9%                                          | (-48.0% 51.3%)  | 0.7%                                          | (-48.2% 65.4%)  |
| Telomere                                        | 2.4%                                        | (-99.4% 96.9%)  | 1.2%                                          | (-112.0% 67.8%) | -0.1%                                         | (-53.0% 49.8%)  |
| <b>Behavioral/Lifestyle measures</b>            |                                             |                 |                                               |                 |                                               |                 |
| Sedentary behavior                              | 0.7%                                        | (-408.7%392.8%) | 14.6%                                         | (-242.4%240.5%) | -1.5%                                         | (-223.0%226.0%) |
| Healthy eating index                            | 10.7%                                       | (-524.5%707.7%) | -3.1%                                         | (-95.9% 66.3%)  | -2.9%                                         | (-87.6% 75.1%)  |
| Smoking pack years                              | 6.0%                                        | (-195.8%186.7%) | 0.3%                                          | (-26.6% 34.0%)  | 0.0%                                          | (-30.2% 39.9%)  |
| Alcohol drinker                                 | -2.3%                                       | (-283.6%221.7%) | 0.0%                                          | (-157.1%143.2%) | 1.8%                                          | (-46.7% 46.9%)  |
| <b>Anthropometric measures</b>                  |                                             |                 |                                               |                 |                                               |                 |
| Waist to thigh ratio                            | 4.7%                                        | (-145.0%201.2%) | 10.5%                                         | (-147.4%319.6%) | -1.0%                                         | (-63.7% 84.8%)  |
| BMI                                             | 1.7%                                        | (-86.4% 74.3%)  | 6.3%                                          | (-121.9%110.8%) | -1.0%                                         | (-150.3% 87.5%) |
| <b>Clinical used blood Biomarkers</b>           |                                             |                 |                                               |                 |                                               |                 |
| Total cholesterol                               | -0.1%                                       | (-165.2%133.3%) | 2.7%                                          | (-52.4% 65.4%)  | 50.8%                                         | (-578.4%814.2%) |
| HDL                                             | 2.5%                                        | (-85.6% 76.3%)  | 0.7%                                          | (-84.6% 59.9%)  | 0.1%                                          | (-37.4% 65.9%)  |
| LDL                                             | -0.4%                                       | (-151.6%127.8%) | 2.6%                                          | (-89.9% 63.6%)  | 47.5%                                         | (-769.7%824.3%) |
| Glucose                                         | 0.6%                                        | (-144.3%134.7%) | 0.7%                                          | (-54.9% 73.8%)  | 0.2%                                          | (-71.9% 59.9%)  |
| C-reactive protein                              | 0.0%                                        | (-31.4% 35.8%)  | -1.7%                                         | (-105.4% 70.2%) | -1.4%                                         | (-50.6% 46.4%)  |

**Supplementary Table 29. Average mediated proportions for DNA methylation and clinical mediators on the relationship between occupation status and all-cause mortality among Black participants of NHANES 1999-2002 (n=516). Bold indicates statistical significance (p-value<0.05), and bold with two asterisks indicates significance passed Bonferroni adjustment (p-value<0.0021).**

**Supplementary Table 30. Average mediated proportions for DNA methylation and clinical mediators on the relationship between occupation status and all-cause mortality among White participants of NHANES 1999-2002 (n=943). Bold indicates statistical significance (p-value<0.05), and bold with two asterisks indicates significance passed Bonferroni adjustment (p-value<0.0021).**

**Supplementary Table 31. Average mediated proportions for DNA methylation and clinical mediators on the relationship between occupation status and all-cause mortality among Hispanic participants of NHANES 1999-2002 (n=860). Bold indicates statistical significance (p-value<0.05), and bold with two asterisks indicates significance passed Bonferroni adjustment (p-value<0.0021).**

**Supplementary Table 32. Average mediated proportions for ten components of GrimAge2 on the relationship between race and ethnicity and all-cause mortality, NHANES 1999-2002 (n=2,402). Bold indicates statistical significance (p-value<0.05), and bold with two asterisks indicates significance passed Bonferroni adjustment (p-value<0.0021).**

|                            | Model 1. Black (N= 516)<br>vs. White (N= 943) |                        | Model 2. Hispanic (N=860)<br>vs. White (N= 943) |                       | Model 3. Other races (N=83)<br>vs. White (N= 943) |                   |
|----------------------------|-----------------------------------------------|------------------------|-------------------------------------------------|-----------------------|---------------------------------------------------|-------------------|
|                            | Average mediated proportion                   | (95% CI)               | Average mediated proportion                     | (95% CI)              | Average mediated proportion                       | (95% CI)          |
| <b>GrimAge2 components</b> |                                               |                        |                                                 |                       |                                                   |                   |
| GDF15Mort                  | 4.1%                                          | (0.1% 11.7%)           | 16.3%                                           | (4.2% 56.1%)          | 8.1%                                              | (-126.9% 131.2%)  |
| B2MMort                    | <b>25.3%**</b>                                | <b>(11.5% 66.4%)</b>   | <b>22.2%**</b>                                  | <b>(9.0% 70.8%)</b>   | 32.2%                                             | (-479.1% 568.0%)  |
| CystatinCMort              | <b>12.1%**</b>                                | <b>(5.1% 27.8%)</b>    | <b>27.3%</b>                                    | <b>(10.7% 84.0%)</b>  | 54.4%                                             | (-625.8% 1107.9%) |
| TIMP1Mort                  | 8.6%                                          | (-1.1% 27.2%)          | <b>13.2%</b>                                    | <b>(0.9% 43.6%)</b>   | 6.9%                                              | (-124.1% 186.7%)  |
| ADMMort                    | <b>-21.4%**</b>                               | <b>(-52.2% - 9.1%)</b> | -13.8%                                          | (-64.6% 0.3%)         | -2.8%                                             | (-72.8% 57.9%)    |
| PAIIMort                   | -1.4%                                         | (-8.9% 3.4%)           | 0.4%                                            | (-10.3% 10.1%)        | -1.6%                                             | (-64.9% 55.8%)    |
| LeptinMort                 | <b>5.6%</b>                                   | <b>(0.6% 15.9%)</b>    | 2.1%                                            | (-3.0% 12.0%)         | 1.0%                                              | (-52.9% 44.4%)    |
| PACKYRSMort                | <b>38.7%**</b>                                | <b>(22.0% 75.4%)</b>   | 0.4%                                            | (-58.0% 25.5%)        | -5.9%                                             | (-182.8% 247.6%)  |
| CRPMort                    | <b>20.5%**</b>                                | <b>(9.1% 45.9%)</b>    | <b>30.8%**</b>                                  | <b>(13.6% 80.6%)</b>  | 11.7%                                             | (-126.0% 137.7%)  |
| logA1CMort                 | <b>27.7%**</b>                                | <b>(14.5% 52.2%)</b>   | <b>29.5%**</b>                                  | <b>(12.4% 121.6%)</b> | 21.9%                                             | (-184.9% 234.8%)  |

**Supplementary Table 33. Average mediated proportions for ten components of GrimAge2 on the relationship between education attainment and all-cause mortality, NHANES 1999-2002 (n=2,402). Bold indicates statistical significance (p-value<0.05), and bold with two asterisks indicates significance passed Bonferroni adjustment (p-value<0.0021).**

|                            | Model 1. Less than high school (N=1,096) vs.<br>College degree or higher (N= 370) |                     | Model 2. High school graduate/GED (N=496)<br>vs. College degree or higher (N= 370) |                     | Model 3. Some college or associates degree (N=440)<br>vs. College degree or higher (N= 370) |                      |
|----------------------------|-----------------------------------------------------------------------------------|---------------------|------------------------------------------------------------------------------------|---------------------|---------------------------------------------------------------------------------------------|----------------------|
|                            | Average mediated proportion                                                       | (95% CI)            | Average mediated proportion                                                        | (95% CI)            | Average mediated proportion                                                                 | (95% CI)             |
| <b>GrimAge2 components</b> |                                                                                   |                     |                                                                                    |                     |                                                                                             |                      |
| GDF15Mort                  | <b>7.0%**</b>                                                                     | <b>(2.2% 13.5%)</b> | 3.1%                                                                               | (-1.2% 11.8%)       | <b>10.8%**</b>                                                                              | <b>(4.3% 21.4%)</b>  |
| B2MMort                    | <b>4.0%</b>                                                                       | <b>(1.1% 8.0%)</b>  | <b>5.4%</b>                                                                        | <b>(0.6% 13.6%)</b> | 2.6%                                                                                        | (-4.3% 10.6%)        |
| CystatinCMort              | <b>4.1%</b>                                                                       | <b>(0.7% 9.8%)</b>  | 3.3%                                                                               | (-0.9% 12.7%)       | 4.2%                                                                                        | (-2.6% 12.8%)        |
| TIMP1Mort                  | <b>8.7%**</b>                                                                     | <b>(3.4% 16.5%)</b> | 3.4%                                                                               | (-0.2% 13.4%)       | <b>9.5%</b>                                                                                 | <b>(2.4% 19.7%)</b>  |
| ADMMort                    | 1.4%                                                                              | (-2.8% 6.2%)        | -0.9%                                                                              | (-9.1% 4.9%)        | 1.8%                                                                                        | (-4.8% 10.0%)        |
| PAIIMort                   | <b>3.0%</b>                                                                       | <b>(0.0% 8.5%)</b>  | 2.1%                                                                               | (-0.6% 8.4%)        | <b>8.6%</b>                                                                                 | <b>(1.0% 26.3%)</b>  |
| LeptinMort                 | 1.3%                                                                              | (-2.8% 7.8%)        | 2.5%                                                                               | (-2.7% 11.2%)       | 0.0%                                                                                        | (-3.9% 5.3%)         |
| PACKYRSMort                | <b>17.6%**</b>                                                                    | <b>(8.8% 30.2%)</b> | <b>17.3%**</b>                                                                     | <b>(6.3% 37.1%)</b> | <b>27.0%**</b>                                                                              | <b>(12.5% 55.8%)</b> |
| CRPMort                    | <b>14.4%**</b>                                                                    | <b>(6.2% 27.5%)</b> | <b>8.2%**</b>                                                                      | <b>(2.3% 23.6%)</b> | <b>9.4%**</b>                                                                               | <b>(2.3% 22.6%)</b>  |
| logA1CMort                 | 5.7%                                                                              | (-1.0% 14.9%)       | <b>7.0%</b>                                                                        | <b>(0.7% 21.3%)</b> | 7.4%                                                                                        | <b>(0.2% 24.2%)</b>  |

**Supplementary Table 34. Average mediated proportions for ten components of GrimAge2 on the relationship between household income and all-cause mortality, NHANES 1999-2002 (n=2,402). Bold indicates statistical significance (p-value<0.05), and bold with two asterisks indicates significance passed Bonferroni adjustment (p-value<0.0021).**

|                            | Model 1. PIR<1 (N=373)<br>vs. PIR 5+ (N= 399) |                      | Model 2. PIR 1-2 (N=707)<br>vs. PIR 5+ (N= 399) |                     | Model 3. PIR 2-5 (N=923)<br>vs. PIR 5+ (N= 399) |                      |
|----------------------------|-----------------------------------------------|----------------------|-------------------------------------------------|---------------------|-------------------------------------------------|----------------------|
|                            | Average mediated proportion                   | (95% CI)             | Average mediated proportion                     | (95% CI)            | Average mediated proportion                     | (95% CI)             |
| <b>GrimAge2 components</b> |                                               |                      |                                                 |                     |                                                 |                      |
| GDF15Mort                  | 4.5%                                          | (-1.7% 13.2%)        | <b>5.9%**</b>                                   | <b>(2.2% 13.2%)</b> | <b>4.5%</b>                                     | <b>(0.5% 18.4%)</b>  |
| B2MMort                    | <b>9.0%**</b>                                 | <b>(2.8% 18.9%)</b>  | <b>8.2%**</b>                                   | <b>(3.5% 15.0%)</b> | <b>10.0%**</b>                                  | <b>(3.8% 24.9%)</b>  |
| CystatinCMort              | <b>6.9%</b>                                   | <b>(1.3% 15.9%)</b>  | <b>9.3%**</b>                                   | <b>(4.0% 19.8%)</b> | <b>5.7%</b>                                     | <b>(1.1% 17.7%)</b>  |
| TIMP1Mort                  | <b>9.4%</b>                                   | <b>(2.4% 19.9%)</b>  | <b>10.2%**</b>                                  | <b>(4.2% 20.2%)</b> | <b>6.5%</b>                                     | <b>(0.0% 21.0%)</b>  |
| ADMMort                    | 2.1%                                          | (-3.4% 8.6%)         | <b>4.4%</b>                                     | <b>(0.6% 11.3%)</b> | <b>3.5%</b>                                     | <b>(-6.5% 14.5%)</b> |
| PAIIMort                   | 1.9%                                          | (-3.2% 8.8%)         | 1.9%                                            | (-0.4% 6.1%)        | 3.8%                                            | (-0.5% 14.5%)        |
| LeptinMort                 | 0.6%                                          | (-1.5% 4.7%)         | 1.5%                                            | (-1.3% 7.0%)        | -0.4%                                           | (-4.9% 2.7%)         |
| PACKYRSMort                | <b>24.0%**</b>                                | <b>(12.9% 40.2%)</b> | <b>17.4%**</b>                                  | <b>(8.7% 32.6%)</b> | <b>14.6%</b>                                    | <b>(3.8% 38.5%)</b>  |
| CRPMort                    | <b>12.9%</b>                                  | <b>(1.8% 27.8%)</b>  | <b>16.9%**</b>                                  | <b>(7.3% 32.4%)</b> | <b>10.2%</b>                                    | <b>(1.3% 29.4%)</b>  |
| logA1CMort                 | <b>8.7%</b>                                   | <b>(0.7% 19.0%)</b>  | <b>5.6%</b>                                     | <b>(1.1% 13.6%)</b> | <b>8.4%</b>                                     | <b>(1.9% 23.7%)</b>  |

Supplementary Table 35. Average mediated proportions for ten components of GrimAge2 on the relationship between occupation status and all-cause mortality, NHANES 1999-2002 (n=2,402). Bold indicates statistical significance (p-value<0.05), and bold with two asterisks indicates significance passed Bonferroni adjustment (p-value<0.0021).

Supplementary Table 36. Average mediated proportions for DNA methylation and clinical mediators on the relationship between race and ethnicity and all-cause mortality, among completed cases from NHANES 1999-2002 cohort (n=2,401). Bold indicates statistical significance (p-value<0.05), and bold with two asterisks indicates significance passed Bonferroni adjustment (p-value<0.0021).

|                                                 | Model 1. Black (N= 516)<br>vs. White (N= 943) |                        | Model 2. Hispanic (N=859)<br>vs. White (N= 943) |                        | Model 3. Other races (N=83)<br>vs. White (N= 943) |                 |
|-------------------------------------------------|-----------------------------------------------|------------------------|-------------------------------------------------|------------------------|---------------------------------------------------|-----------------|
|                                                 | Average mediated<br>proportion                | (95% CI)               | Average mediated<br>proportion                  | (95% CI)               | Average mediated<br>proportion                    | (95% CI)        |
| <b>Chronological age clocks</b>                 |                                               |                        |                                                 |                        |                                                   |                 |
| Hannum                                          | <b>-19.1%**</b>                               | <b>(-37.8%- 10.5%)</b> | 5.8%                                            | (-4.4% 20.7%)          | 4.5%                                              | (-100.1% 99.9%) |
| Hovarth                                         | <b>-5.2%**</b>                                | <b>(-14.6% - 0.7%)</b> | -4.9%                                           | (-23.4% 1.3%)          | -1.3%                                             | (-93.6% 56.7%)  |
| Weidner                                         | <b>-2.5%**</b>                                | <b>(-8.2% - 0.3%)</b>  | -3.9%                                           | (-17.5% 0.6%)          | -4.9%                                             | (-98.1% 82.1%)  |
| Lin                                             | -2.9%                                         | (-10.6% 0.3%)          | -3.5%                                           | (-15.7% 1.7%)          | -3.8%                                             | (-62.5% 73.0%)  |
| Vidal-Bralo                                     | <b>-14.6%**</b>                               | <b>(-35.9% - 4.9%)</b> | <b>-10.2%</b>                                   | <b>(-40.9% - 2.4%)</b> | -13.5%                                            | (-251.5%159.5%) |
| SkinBlood                                       | <b>-4.9%**</b>                                | <b>(-15.5% - 0.5%)</b> | 0.1%                                            | (-4.1% 4.4%)           | 1.0%                                              | (-38.1% 47.3%)  |
| Zhang                                           | <b>-9.9%**</b>                                | <b>(-27.0% - 2.8%)</b> | -1.1%                                           | (-8.2% 2.4%)           | -2.4%                                             | (-59.4% 50.6%)  |
| <b>Physiological functioning clocks</b>         |                                               |                        |                                                 |                        |                                                   |                 |
| PhenoAge                                        | -6.8%                                         | (-22.8% 0.6%)          | 9.4%                                            | (-1.7% 36.3%)          | 5.7%                                              | (-119.3%161.6%) |
| GrimAge                                         | <b>34.4%**</b>                                | <b>(18.7% 66.8%)</b>   | 15.7%                                           | (-16.5% 52.8%)         | 12.0%                                             | (-193.5%234.7%) |
| GrimAge2                                        | <b>46.0%**</b>                                | <b>(26.6% 88.7%)</b>   | <b>39.3%</b>                                    | <b>(17.6% 120.0%)</b>  | 24.8%                                             | (-206.7%288.7%) |
| <b>Pace of aging clock</b>                      |                                               |                        |                                                 |                        |                                                   |                 |
| DunedinPoAm                                     | <b>23.6%**</b>                                | <b>(10.0% 48.9%)</b>   | <b>29.4%</b>                                    | <b>(11.2% 83.1%)</b>   | 27.2%                                             | (-211.4%340.7%) |
| <b>Clocks trained on other aging biomarkers</b> |                                               |                        |                                                 |                        |                                                   |                 |
| Yang                                            | 7.4%                                          | (-6.8% 20.9%)          | 3.8%                                            | (-9.4% 19.7%)          | 1.3%                                              | (-98.4% 124.6%) |
| Telomere                                        | <b>-44.4%**</b>                               | <b>(-79.1%- 27.2%)</b> | 2.5%                                            | (-19.4% 19.3%)         | 9.1%                                              | (-177.4%157.2%) |
| <b>Behavioral/Lifestyle measures</b>            |                                               |                        |                                                 |                        |                                                   |                 |
| Sedentary behavior                              | <b>27.8%**</b>                                | <b>(13.4% 54.0%)</b>   | <b>24.1%</b>                                    | <b>(5.9% 80.7%)</b>    | 18.3%                                             | (-258.0%230.9%) |
| Healthy eating index                            | <b>6.6%**</b>                                 | <b>(0.7% 18.7%)</b>    | 3.3%                                            | (-6.4% 24.3%)          | -0.1%                                             | (-39.6% 42.9%)  |
| Smoking pack years                              | <b>-19.0%**</b>                               | <b>(-45.3% - 8.5%)</b> | <b>-15.0%</b>                                   | <b>(-48.0% - 5.1%)</b> | -10.4%                                            | (-155.5%171.8%) |
| Alcohol drinker                                 | <b>13.6%**</b>                                | <b>(5.4% 27.6%)</b>    | <b>10.7%</b>                                    | <b>(1.5% 49.2%)</b>    | 20.6%                                             | (-334.4%457.4%) |
| <b>Anthropometric measures</b>                  |                                               |                        |                                                 |                        |                                                   |                 |
| Waist to thigh ratio                            | <b>-33.7%**</b>                               | <b>(-86.4%- 17.0%)</b> | <b>16.4%</b>                                    | <b>(4.3% 59.3%)</b>    | 7.7%                                              | (-240.8%251.2%) |
| BMI                                             | 2.3%                                          | (-7.1% 15.0%)          | 0.3%                                            | (-17.2% 18.0%)         | -0.2%                                             | (-28.1% 30.2%)  |
| <b>Clinical used blood Biomarkers</b>           |                                               |                        |                                                 |                        |                                                   |                 |
| Total cholesterol                               | -0.6%                                         | (-4.5% 1.3%)           | 0.0%                                            | (-4.7% 3.6%)           | -0.3%                                             | (-35.1% 20.0%)  |
| HDL                                             | -0.8%                                         | (-6.6% 2.8%)           | 5.7%                                            | (-5.0% 17.9%)          | 1.4%                                              | (-40.2% 41.0%)  |
| LDL                                             | 0.0%                                          | (-4.6% 5.1%)           | 0.1%                                            | (-6.0% 5.7%)           | 0.1%                                              | (-6.6% 15.0%)   |
| Glucose                                         | <b>7.7%**</b>                                 | <b>(1.9% 17.9%)</b>    | <b>5.6%</b>                                     | <b>(1.0% 19.6%)</b>    | 7.1%                                              | (-137.9% 92.1%) |
| C-reactive protein                              | <b>9.5%**</b>                                 | <b>(3.0% 23.0%)</b>    | 1.7%                                            | (-2.2% 8.8%)           | -0.7%                                             | (-56.2% 57.8%)  |

**Supplementary Table 37. Average mediated proportions for DNA methylation and clinical mediators on the relationship between education attainment and all-cause mortality, among completed cases from NHANES 1999-2002 cohort (n=2,399). Bold indicates statistical significance (p-value<0.05), and bold with two asterisks indicates significance passed Bonferroni adjustment (p-value<0.0021).**

|                                                 | Model 1. Less than high school (N=1,093) vs. College degree or higher (N= 370) |                                                                                                                                                                                  |               | Model 2. High school graduate/GED (N=496) vs. College degree or higher (N= 370) |                                                                                                            |               | Model 3. Some college or associates degree (N=440) vs. College degree or higher (N= 370) |                                        |                |
|-------------------------------------------------|--------------------------------------------------------------------------------|----------------------------------------------------------------------------------------------------------------------------------------------------------------------------------|---------------|---------------------------------------------------------------------------------|------------------------------------------------------------------------------------------------------------|---------------|------------------------------------------------------------------------------------------|----------------------------------------|----------------|
|                                                 | Average mediated proportion                                                    | (95% CI)                                                                                                                                                                         |               | Average mediated proportion                                                     | (95% CI)                                                                                                   |               | Average mediated proportion                                                              | (95% CI)                               |                |
| <b>Chronological age clocks</b>                 |                                                                                |                                                                                                                                                                                  |               |                                                                                 |                                                                                                            |               |                                                                                          |                                        |                |
| Hannum                                          | 1.7%                                                                           | (-0.1%                                                                                                                                                                           | 4.4%)         | <b>4.4%</b>                                                                     | <b>(0.3%</b> <td><b>13.4%)</b></td> <td>0.5%</td> <td>(-6.9%</td> <td>7.7%)</td>                           | <b>13.4%)</b> | 0.5%                                                                                     | (-6.9%                                 | 7.7%)          |
| Hovarth                                         | -0.1%                                                                          | (-1.9%                                                                                                                                                                           | 1.3%)         | -1.7%                                                                           | (-8.9%                                                                                                     | 1.3%)         | <b>-4.1%</b>                                                                             | <b>(-14.0%</b> <td><b>- 0.2%)</b></td> | <b>- 0.2%)</b> |
| Weidner                                         | -0.2%                                                                          | (-3.2%                                                                                                                                                                           | 1.1%)         | 0.1%                                                                            | (-3.0%                                                                                                     | 3.7%)         | -0.9%                                                                                    | (-7.8%                                 | 1.6%)          |
| Lin                                             | -0.2%                                                                          | (-2.2%                                                                                                                                                                           | 1.2%)         | -1.2%                                                                           | (-5.5%                                                                                                     | 1.0%)         | -0.5%                                                                                    | (-5.4%                                 | 3.1%)          |
| Vidal-Bralo                                     | -0.7%                                                                          | (-3.3%                                                                                                                                                                           | 0.6%)         | -0.3%                                                                           | (-5.0%                                                                                                     | 1.6%)         | -0.7%                                                                                    | (-5.8%                                 | 2.6%)          |
| SkinBlood                                       | 0.3%                                                                           | (-0.9%                                                                                                                                                                           | 2.4%)         | 0.9%                                                                            | (-1.2%                                                                                                     | 5.7%)         | 0.0%                                                                                     | (-3.4%                                 | 2.7%)          |
| Zhang                                           | 0.5%                                                                           | (-0.8%                                                                                                                                                                           | 2.4%)         | 0.2%                                                                            | (-1.7%                                                                                                     | 3.1%)         | -0.1%                                                                                    | (-5.5%                                 | 3.2%)          |
| <b>Physiological functioning clocks</b>         |                                                                                |                                                                                                                                                                                  |               |                                                                                 |                                                                                                            |               |                                                                                          |                                        |                |
| PhenoAge                                        | <b>6.8%**</b>                                                                  | <b>(2.8%</b> <td><b>13.4%)</b></td> <td>2.9%</td> <td>(-1.3%</td> <td>12.2%)</td> <td>3.1%</td> <td>(-5.0%</td> <td>12.4%)</td>                                                  | <b>13.4%)</b> | 2.9%                                                                            | (-1.3%                                                                                                     | 12.2%)        | 3.1%                                                                                     | (-5.0%                                 | 12.4%)         |
| GrimAge                                         | <b>23.5%**</b>                                                                 | <b>(13.2%</b> <td><b>37.0%)</b></td> <td><b>18.7%**</b></td> <td><b>(8.1%</b> <td><b>41.7%)</b></td> <td><b>31.8%**</b></td> <td><b>(17.8%</b> <td><b>57.5%)</b></td> </td></td> | <b>37.0%)</b> | <b>18.7%**</b>                                                                  | <b>(8.1%</b> <td><b>41.7%)</b></td> <td><b>31.8%**</b></td> <td><b>(17.8%</b> <td><b>57.5%)</b></td> </td> | <b>41.7%)</b> | <b>31.8%**</b>                                                                           | <b>(17.8%</b> <td><b>57.5%)</b></td>   | <b>57.5%)</b>  |
| GrimAge2                                        | <b>28.1%**</b>                                                                 | <b>(16.9%</b> <td><b>42.9%)</b></td> <td><b>21.4%**</b></td> <td><b>(9.9%</b> <td><b>48.5%)</b></td> <td><b>32.4%**</b></td> <td><b>(17.2%</b> <td><b>64.2%)</b></td> </td></td> | <b>42.9%)</b> | <b>21.4%**</b>                                                                  | <b>(9.9%</b> <td><b>48.5%)</b></td> <td><b>32.4%**</b></td> <td><b>(17.2%</b> <td><b>64.2%)</b></td> </td> | <b>48.5%)</b> | <b>32.4%**</b>                                                                           | <b>(17.2%</b> <td><b>64.2%)</b></td>   | <b>64.2%)</b>  |
| <b>Pace of aging clock</b>                      |                                                                                |                                                                                                                                                                                  |               |                                                                                 |                                                                                                            |               |                                                                                          |                                        |                |
| DunedinPoAm                                     | <b>13.3%**</b>                                                                 | <b>(6.1%</b> <td><b>22.5%)</b></td> <td><b>11.4%**</b></td> <td><b>(2.8%</b> <td><b>27.6%)</b></td> <td><b>22.0%**</b></td> <td><b>(11.0%</b> <td><b>38.0%)</b></td> </td></td>  | <b>22.5%)</b> | <b>11.4%**</b>                                                                  | <b>(2.8%</b> <td><b>27.6%)</b></td> <td><b>22.0%**</b></td> <td><b>(11.0%</b> <td><b>38.0%)</b></td> </td> | <b>27.6%)</b> | <b>22.0%**</b>                                                                           | <b>(11.0%</b> <td><b>38.0%)</b></td>   | <b>38.0%)</b>  |
| <b>Clocks trained on other aging biomarkers</b> |                                                                                |                                                                                                                                                                                  |               |                                                                                 |                                                                                                            |               |                                                                                          |                                        |                |
| Yang                                            | -0.8%                                                                          | (-4.2%                                                                                                                                                                           | 2.3%)         | 1.2%                                                                            | (-1.5%                                                                                                     | 6.0%)         | 0.3%                                                                                     | (-3.9%                                 | 4.5%)          |
| Telomere                                        | <b>5.3%**</b>                                                                  | <b>(1.9%</b> <td><b>10.1%)</b></td> <td><b>5.7%**</b></td> <td><b>(1.9%</b> <td><b>13.1%)</b></td> <td>3.5%</td> <td>(-0.9%</td> <td>10.9%)</td> </td>                           | <b>10.1%)</b> | <b>5.7%**</b>                                                                   | <b>(1.9%</b> <td><b>13.1%)</b></td> <td>3.5%</td> <td>(-0.9%</td> <td>10.9%)</td>                          | <b>13.1%)</b> | 3.5%                                                                                     | (-0.9%                                 | 10.9%)         |
| <b>Behavioral/Lifestyle measures</b>            |                                                                                |                                                                                                                                                                                  |               |                                                                                 |                                                                                                            |               |                                                                                          |                                        |                |
| Sedentary behavior                              | <b>13.3%**</b>                                                                 | <b>(6.9%</b> <td><b>23.5%)</b></td> <td><b>20.8%**</b></td> <td><b>(9.8%</b> <td><b>42.7%)</b></td> <td>5.9%</td> <td>(-1.4%</td> <td>19.3%)</td> </td>                          | <b>23.5%)</b> | <b>20.8%**</b>                                                                  | <b>(9.8%</b> <td><b>42.7%)</b></td> <td>5.9%</td> <td>(-1.4%</td> <td>19.3%)</td>                          | <b>42.7%)</b> | 5.9%                                                                                     | (-1.4%                                 | 19.3%)         |
| Healthy eating index                            | 2.3%                                                                           | (-7.1%                                                                                                                                                                           | 14.1%)        | 1.2%                                                                            | (-14.7%                                                                                                    | 13.4%)        | 3.8%                                                                                     | (-5.7%                                 | 14.4%)         |
| Smoking pack years                              | <b>10.2%**</b>                                                                 | <b>(4.5%</b> <td><b>18.2%)</b></td> <td><b>11.0%</b></td> <td><b>(2.1%</b> <td><b>31.2%)</b></td> <td><b>16.4%**</b></td> <td><b>(7.4%</b> <td><b>31.0%)</b></td> </td></td>     | <b>18.2%)</b> | <b>11.0%</b>                                                                    | <b>(2.1%</b> <td><b>31.2%)</b></td> <td><b>16.4%**</b></td> <td><b>(7.4%</b> <td><b>31.0%)</b></td> </td>  | <b>31.2%)</b> | <b>16.4%**</b>                                                                           | <b>(7.4%</b> <td><b>31.0%)</b></td>    | <b>31.0%)</b>  |
| Alcohol drinker                                 | 2.6%                                                                           | (-2.5%                                                                                                                                                                           | 8.5%)         | 7.1%                                                                            | <b>(0.7%</b> <td><b>19.6%)</b></td> <td>2.1%</td> <td>(-2.5%</td> <td>10.5%)</td>                          | <b>19.6%)</b> | 2.1%                                                                                     | (-2.5%                                 | 10.5%)         |
| <b>Anthropometric measures</b>                  |                                                                                |                                                                                                                                                                                  |               |                                                                                 |                                                                                                            |               |                                                                                          |                                        |                |
| Waist to thigh ratio                            | <b>5.6%**</b>                                                                  | <b>(1.7%</b> <td><b>12.8%)</b></td> <td>2.8%</td> <td>(-4.7%</td> <td>10.8%)</td> <td>4.6%</td> <td>(-2.8%</td> <td>14.6%)</td>                                                  | <b>12.8%)</b> | 2.8%                                                                            | (-4.7%                                                                                                     | 10.8%)        | 4.6%                                                                                     | (-2.8%                                 | 14.6%)         |
| BMI                                             | 0.4%                                                                           | (-4.6%                                                                                                                                                                           | 6.1%)         | 3.1%                                                                            | (-2.0%                                                                                                     | 15.3%)        | 5.3%                                                                                     | (-7.0%                                 | 23.6%)         |
| <b>Clinical used blood Biomarkers</b>           |                                                                                |                                                                                                                                                                                  |               |                                                                                 |                                                                                                            |               |                                                                                          |                                        |                |
| Total cholesterol                               | 0.0%                                                                           | (-1.5%                                                                                                                                                                           | 1.7%)         | -0.1%                                                                           | (-13.2%                                                                                                    | 10.1%)        | -3.1%                                                                                    | (-14.8%                                | 2.2%)          |
| HDL                                             | -0.1%                                                                          | (-6.6%                                                                                                                                                                           | 5.5%)         | 0.1%                                                                            | (-4.7%                                                                                                     | 5.2%)         | 0.0%                                                                                     | (-4.4%                                 | 3.8%)          |
| LDL                                             | -3.8%                                                                          | (-14.6%                                                                                                                                                                          | 0.5%)         | 10.6%                                                                           | (-27.0%                                                                                                    | 60.9%)        | -4.7%                                                                                    | (-60.0%                                | 19.9%)         |
| Glucose                                         | 2.4%                                                                           | (0.1%                                                                                                                                                                            | 6.5%)         | 1.3%                                                                            | (-2.0%                                                                                                     | 7.0%)         | -1.7%                                                                                    | (-11.6%                                | 4.1%)          |
| C-reactive protein                              | <b>2.0%</b>                                                                    | <b>(0.5%</b> <td><b>4.9%)</b></td> <td>0.7%</td> <td>(-2.3%</td> <td>4.1%)</td> <td>0.8%</td> <td>(-3.2%</td> <td>6.2%)</td>                                                     | <b>4.9%)</b>  | 0.7%                                                                            | (-2.3%                                                                                                     | 4.1%)         | 0.8%                                                                                     | (-3.2%                                 | 6.2%)          |

**Supplementary Table 38. Average mediated proportions for DNA methylation and clinical mediators on the relationship between household income and all-cause mortality, among completed cases from NHANES 1999-2002 cohort (n=2,123). Bold indicates statistical significance (p-value<0.05), and bold with two asterisks indicates significance passed Bonferroni adjustment (p-value<0.0021).**

|                                                 | Model 1. PIR<1 (N=373)<br>vs. PIR 5+ (N= 399) |                      | Model 2. PIR 1-2 (N=591)<br>vs. PIR 5+ (N= 399) |                      | Model 3. PIR 2-5 (N=760)<br>vs. PIR 5+ (N= 399) |                     |
|-------------------------------------------------|-----------------------------------------------|----------------------|-------------------------------------------------|----------------------|-------------------------------------------------|---------------------|
|                                                 | Average mediated proportion                   | (95% CI)             | Average mediated proportion                     | (95% CI)             | Average mediated proportion                     | (95% CI)            |
| <b>Chronological age clocks</b>                 |                                               |                      |                                                 |                      |                                                 |                     |
| Hannum                                          | 3.1%                                          | (-0.6% 7.8%)         | 3.8%                                            | (-0.0% 8.2%)         | -0.1%                                           | (-7.3% 6.5%)        |
| Hovarth                                         | -0.1%                                         | (-2.7% 1.4%)         | -0.2%                                           | (-4.1% 3.3%)         | 0.1%                                            | (-3.8% 4.1%)        |
| Weidner                                         | 0.3%                                          | (-1.6% 2.9%)         | 1.2%                                            | (-1.2% 4.6%)         | 0.0%                                            | (-1.8% 2.5%)        |
| Lin                                             | 0.1%                                          | (-1.5% 2.5%)         | -0.7%                                           | (-2.9% 0.9%)         | -0.9%                                           | (-6.9% 2.7%)        |
| Vidal-Bralo                                     | -0.3%                                         | (-3.0% 1.0%)         | 1.2%                                            | (-1.9% 4.9%)         | 0.0%                                            | (-2.3% 2.7%)        |
| SkinBlood                                       | -0.3%                                         | (-3.8% 1.8%)         | 0.0%                                            | (-1.7% 2.1%)         | -0.2%                                           | (-3.4% 4.3%)        |
| Zhang                                           | -0.4%                                         | (-2.8% 1.2%)         | -0.5%                                           | (-2.9% 1.4%)         | -0.8%                                           | (-5.7% 1.6%)        |
| <b>Physiological functioning clocks</b>         |                                               |                      |                                                 |                      |                                                 |                     |
| PhenoAge                                        | <b>5.3%</b>                                   | <b>(0.4% 14.4%)</b>  | <b>10.0%**</b>                                  | <b>(3.3% 20.3%)</b>  | 3.2%                                            | (-1.6% 13.5%)       |
| GrimAge                                         | <b>32.6%**</b>                                | <b>(20.6% 49.6%)</b> | <b>24.2%**</b>                                  | <b>(13.7% 42.9%)</b> | <b>19.7%</b>                                    | <b>(7.2% 52.3%)</b> |
| GrimAge2                                        | <b>37.1%**</b>                                | <b>(22.7% 57.4%)</b> | <b>28.4%**</b>                                  | <b>(17.2% 54.3%)</b> | <b>22.7%**</b>                                  | <b>(9.3% 61.1%)</b> |
| <b>Pace of aging clock</b>                      |                                               |                      |                                                 |                      |                                                 |                     |
| DunedinPoAm                                     | <b>19.4%**</b>                                | <b>(9.2% 35.6%)</b>  | <b>14.1%**</b>                                  | <b>(5.7% 30.3%)</b>  | <b>13.3%</b>                                    | <b>(2.0% 38.0%)</b> |
| <b>Clocks trained on other aging biomarkers</b> |                                               |                      |                                                 |                      |                                                 |                     |
| Yang                                            | 0.2%                                          | (-4.9% 5.1%)         | 0.8%                                            | (-3.2% 5.6%)         | 0.0%                                            | (-3.1% 2.2%)        |
| Telomere                                        | 2.2%                                          | (-1.0% 7.4%)         | <b>6.8%**</b>                                   | <b>(2.7% 13.3%)</b>  | 2.9%                                            | (-0.7% 9.6%)        |
| <b>Behavioral/Lifestyle measures</b>            |                                               |                      |                                                 |                      |                                                 |                     |
| Sedentary behavior                              | <b>20.4%</b>                                  | <b>(4.7% 40.8%)</b>  | <b>10.9%</b>                                    | <b>(1.9% 26.2%)</b>  | <b>13.7%</b>                                    | <b>(1.2% 46.1%)</b> |
| Healthy eating index                            | 4.9%                                          | (-9.6% 20.5%)        | -0.2%                                           | (-7.1% 8.6%)         | 4.8%                                            | (-2.5% 26.2%)       |
| Smoking pack years                              | <b>11.2%**</b>                                | <b>(4.8% 19.2%)</b>  | <b>11.6%</b>                                    | <b>(3.4% 28.6%)</b>  | <b>13.2%**</b>                                  | <b>(4.2% 35.4%)</b> |
| Alcohol drinker                                 | -3.6%                                         | (-19.8% 7.8%)        | 1.8%                                            | (-11.2% 13.2%)       | 6.0%                                            | (-1.6% 20.2%)       |
| <b>Anthropometric measures</b>                  |                                               |                      |                                                 |                      |                                                 |                     |
| Waist to thigh ratio                            | 4.9%                                          | (-2.1% 12.4%)        | 6.1%                                            | (-1.8% 16.3%)        | <b>10.2%</b>                                    | <b>(1.2% 26.3%)</b> |
| BMI                                             | -1.1%                                         | (-11.8% 8.3%)        | 0.6%                                            | (-12.9% 8.2%)        | 1.6%                                            | (-11.9% 14.3%)      |
| <b>Clinical used blood Biomarkers</b>           |                                               |                      |                                                 |                      |                                                 |                     |
| Total cholesterol                               | -0.1%                                         | (-3.8% 3.4%)         | 0.2%                                            | (-1.8% 3.6%)         | -0.6%                                           | (-7.1% 3.4%)        |
| HDL                                             | -3.8%                                         | (-16.0% 5.4%)        | 0.2%                                            | (-7.6% 7.1%)         | 0.7%                                            | (-6.2% 9.4%)        |
| LDL                                             | -1.7%                                         | (-15.7% 4.6%)        | -0.4%                                           | (-37.6% 25.1%)       | 1.4%                                            | (-73.5% 95.2%)      |
| Glucose                                         | <b>6.2%</b>                                   | <b>(1.3% 15.3%)</b>  | 1.7%                                            | (-2.5% 7.6%)         | 3.7%                                            | (-0.5% 14.0%)       |
| C-reactive protein                              | <b>2.0%</b>                                   | <b>(0.4% 5.2%)</b>   | <b>4.8%</b>                                     | <b>(0.6% 10.5%)</b>  | 2.4%                                            | (-0.2% 7.8%)        |

**Supplementary Table 39. Average mediated proportions for DNA methylation and clinical mediators on the relationship between occupation status and all-cause mortality, among completed cases from NHANES 1999-2002 cohort (n=2,262). Bold indicates statistical significance (p-value<0.05), and bold with two asterisks indicates significance passed Bonferroni adjustment (p-value<0.0021).**

**Supplementary Table 40. The causal mediation tests for interactions between social positions and DNA methylation and clinical mediators using R *mediation* package built-in test. The estimates is average causal mediation effects (ACME) differences conditional on treatment status on all-cause mortality, NHANES 1999-2002 (n=2,402). Bold indicates statistical significance (p-value<0.05), and bold with two asterisks indicates significance passed Bonferroni adjustment (p-value<0.0021).**

**Supplementary Table 41. The wald-test for a square term of DNA methylation and clinical mediators prediction all-cause mortality outcome, NHANES 1999-2002 (n=2,402). Bold indicates statistical significance (p-value<0.05), and bold with two asterisks indicates significance passed Bonferroni adjustment (p-value<0.0021).**

|                                                 | Overall sample<br>(N=2,042) |              |
|-------------------------------------------------|-----------------------------|--------------|
|                                                 | Beta                        | p-value      |
| <b>Chronological age clocks</b>                 |                             |              |
| Hannum                                          | -5.38E-04                   | 0.174        |
| Hovarth                                         | 9.51E-05                    | 0.825        |
| Weidner                                         | 2.75E-04                    | 0.126        |
| Lin                                             | 4.44E-05                    | 0.737        |
| Vidal-Bralo                                     | 3.97E-04                    | 0.223        |
| SkinBlood                                       | 2.79E-04                    | 0.519        |
| Zhang                                           | 2.85E-05                    | 0.992        |
| <b>Physiological functioning clocks</b>         |                             |              |
| PhenoAge                                        | 4.09E-05                    | 0.911        |
| GrimAge                                         | -7.31E-04                   | 0.283        |
| GrimAge2                                        | -7.38E-04                   | 0.305        |
| <b>Pace of aging clock</b>                      |                             |              |
| DunedinPoAm                                     | -3.21E+00                   | 0.260        |
| <b>Clocks trained on other aging biomarkers</b> |                             |              |
| Yang                                            | 5.17E+00                    | 0.931        |
| Telomere                                        | -3.54E-01                   | 0.317        |
| <b>Behavioral/Lifestyle measures</b>            |                             |              |
| Sedentary behavior                              | NA                          | NA           |
| Healthy eating index                            | 7.68E-05                    | 0.629        |
| Smoking pack years                              | -3.75E-05                   | 0.149        |
| Alcohol drinker                                 | NA                          | NA           |
| <b>Anthropometric measures</b>                  |                             |              |
| Waist to thigh ratio                            | 1.57E-01                    | 0.769        |
| BMI                                             | <b>3.35E-03**</b>           | <b>0.000</b> |
| <b>Clinical used blood Biomarkers</b>           |                             |              |
| Total cholesterol                               | <b>6.61E-02**</b>           | <b>0.001</b> |
| HDL                                             | <b>2.24E-04</b>             | <b>0.015</b> |
| LDL                                             | 3.57E-05                    | 0.057        |
| Glucose                                         | 2.86E-06                    | 0.523        |
| C-reactive protein                              | <b>-3.69E-02**</b>          | <b>0.002</b> |
