# Supplementary material
Source: publisher site journal article supplement (doi:10.18632/aging.206377)
Supplement: Supplementary file 2 [file aging-v18i1-206377-supplementary-material-SD11.xlsx]

## Sheet: Supplementary Table 21
Supplementary Table 21. Average mediated proportions for DNA methylation and clinical mediators on the relationship between occupation status and all-cause mortality among women of NHANES 1999-2002 (n=1,172). Bold indicates statistical significance (p-value<0.05), and bold with two asterisks indicates significance passed Bonferroni adjustment (p-value<0.0021).
	Model 1. Semi-routine white collar (N=300) vs. White collar (N=244)				Model 2. High skill blue collar (N=108) vs. White collar (N=244)				Model 3. Semi-routine blue collar (N=488) vs. White collar (N=244)				Model 4. Never worked (N=32) vs. White collar (N=244)
	Average mediated proportion	(95% CI)			Average mediated proportion	(95% CI)			Average mediated proportion	(95% CI)			Average mediated proportion	(95% CI)
Chronological age clocks
Hannum	0.00130314	-1.52491	1.45261		0.605456	-9.23135	7.57781		0.0813478	-1.86254	2.92781		-0.0191437	-4.3244	3.42708
Hovarth	0.0166136	-1.19559	1.56704		0.018642	-1.03886	1.6221		-0.00195711	-1.10302	0.874728		-0.00154348	-1.40006	1.09751
Weidner	0.00893812	-0.790958	0.69093		-0.0162028	-1.56248	1.05938		0.00978738	-1.31816	1.19741		0.00170414	-0.752034	1.15334
Lin	0.0122276	-0.902277	0.93872		0.0188361	-0.889206	0.795038		-0.00235827	-1.06305	1.04071		-0.00265278	-0.53298	0.67435
Vidal-Bralo	0.0171623	-0.832937	1.0762		0.0138777	-1.06665	1.20221		-0.0881614	-2.47976	2.36748		0.00453687	-0.545798	0.678502
SkinBlood	0.00908541	-1.17574	1.1888		0.0684399	-1.48415	2.02851		0.00994283	-1.14689	0.855855		-0.00247258	-1.0395	0.937198
Zhang	0.00238241	-1.22143	0.804913		0.0918229	-1.95836	2.30179		0.00806902	-0.673936	0.931272		-0.0112495	-1.55301	1.2178
Physiological functioning clocks
PhenoAge	-0.0502038	-2.10464	2.61041		0.213636	-4.8501	5.43414		0.0767957	-1.62522	1.72044		-0.0447187	-4.15385	2.079
GrimAge	-0.0214669	-10.1078	7.26889		0.684904	-11.4875	11.6387		0.433849	-6.88424	7.66622		-0.146055	-5.57641	4.23277
GrimAge2	-0.15756	-8.06233	7.86213		0.806291	-13.3571	12.2814		0.609693	-7.81953	9.75036		-0.0708463	-5.34387	5.53889
Pace of aging clock
DunedinPoAm	0.134782	-5.25794	5.43866		0.454775	-3.92405	4.02744		0.296171	-4.76424	2.98245		0.00506937	-3.23517	3.02465
Clocks trained on other aging biomarkers
Yang	1.65079e-05	-0.465477	0.607084		-0.0743289	-2.22721	1.27807		-0.00731459	-0.779141	0.770152		-0.000768382	-0.396971	0.343161
Telomere	0.0192354	-1.27289	1.94911		0.0460848	-0.639972	0.976358		0.0827805	-1.65503	1.23076		0.00223205	-1.05881	1.12591
Behavioral/Lifestyle measures
Sedentary behavior	-0.012784	-2.56736	3.0805		0.390859	-4.74241	4.3927		0.612657	-8.36577	10.2292		0.0217814	-2.42216	3.1191
Healthy eating index	0.000153862	-1.58514	1.29416		0.0731495	-1.90873	2.08712		0.340227	-6.68559	5.0877		-0.0115197	-3.00792	1.51415
Smoking pack years	-0.0113585	-2.4914	2.18528		0.103318	-1.20153	1.36481		0.093239	-1.27765	1.64584		0.00346496	-2.75045	3.26525
Alcohol drinker	-0.0128622	-1.62935	3.45367		0.128052	-2.43053	1.94689		0.271614	-5.0402	5.22098		-0.00174261	-1.19872	1.35706
Anthropometric measures
Waist to thigh ratio	0.0125644	-0.709674	1.15294		0.307158	-4.94591	4.75457		0.314131	-5.6109	5.25273		-0.0869884	-5.66832	7.59205
BMI	0.000480355	-0.674052	0.553187		0.27681	-4.25989	4.12293		0.0630041	-2.05616	3.21534		0.0127427	-2.02973	1.73304
Clinical used blood Biomarkers
Total cholesterol	0.00208382	-0.638052	0.476461		0.00185536	-0.493327	0.505956		-0.00316713	-0.576828	0.941023		0.0343357	-2.00145	3.67835
HDL	0.00110195	-0.354299	0.472643		0.152816	-1.18508	2.16848		0.274033	-5.65483	6.23532		0.0719482	-2.0741	2.25274
LDL	0.00111922	-0.340767	0.557881		0.00128483	-0.376752	0.476443		-0.0116169	-1.52056	1.05936		0.0162057	-1.63544	1.17741
Glucose	0.00842716	-1.34405	1.14865		0.257588	-2.79629	5.43073		0.0120546	-0.78108	1.50566		-0.0104729	-2.12848	1.8087
C-reactive protein	0.0056414	-1.16785	1.13877		0.0737706	-1.0077	1.49567		0.0243327	-1.04771	1.73331		0.0416518	-1.89912	1.96903
