# Supplementary material
Source: publisher site journal article supplement (doi:10.18632/aging.206377)
Supplement: Supplementary file 3 [file aging-v18i1-206377-supplementary-material-SD10.pdf]

**Supplementary Table 15. Average mediated proportions for DNA methylation and clinical mediators on the relationship between race and ethnicity and all-cause mortality among women of NHANES 1999-2002 (n=1,172). Bold indicates statistical significance (p-value<0.05), and bold with two asterisks indicates significance passed Bonferroni adjustment (p-value<0.0021).**

|                                                 | Model 1. Black (N=250)<br>vs. White (N=456) |                  | Model 2. Hispanic (N=419)<br>vs. White (N=456) |                        | Model 3. Other races (N=47)<br>vs. White (N= 456) |                  |
|-------------------------------------------------|---------------------------------------------|------------------|------------------------------------------------|------------------------|---------------------------------------------------|------------------|
|                                                 | Average mediated<br>proportion              | (95% CI)         | Average mediated<br>proportion                 | (95% CI)               | Average<br>mediated<br>proportion                 | (95% CI)         |
| <b>Chronological age clocks</b>                 |                                             |                  |                                                |                        |                                                   |                  |
| Hannum                                          | -44.6%                                      | (-362.1% 237.7%) | 2.0%                                           | (-15.0% 16.5%)         | 3.6%                                              | (-126.7% 116.8%) |
| Hovarth                                         | -12.0%                                      | (-125.2% 42.3%)  | -7.4%                                          | (-27.0% 0.2%)          | -1.4%                                             | (-48.8% 53.2%)   |
| Weidner                                         | -14.6%                                      | (-139.0% 67.0%)  | <b>-8.8%</b>                                   | <b>(-26.6% - 0.3%)</b> | -14.9%                                            | (-260.1% 144.7%) |
| Lin                                             | -11.2%                                      | (-112.1% 55.2%)  | <b>-8.5%</b>                                   | <b>(-29.3% - 0.9%)</b> | -5.7%                                             | (-108.2% 101.9%) |
| Vidal-Bralo                                     | -40.5%                                      | (-440.9% 214.2%) | <b>-14.2%**</b>                                | <b>(-38.7% - 4.9%)</b> | -17.7%                                            | (-152.1% 263.1%) |
| SkinBlood                                       | -17.3%                                      | (-259.4% 109.7%) | -2.9%                                          | (-16.6% 4.7%)          | 1.1%                                              | (-59.2% 52.8%)   |
| Zhang                                           | -28.5%                                      | (-233.7% 197.7%) | -3.5%                                          | (-15.5% 2.1%)          | -2.3%                                             | (-81.1% 49.3%)   |
| <b>Physiological functioning clocks</b>         |                                             |                  |                                                |                        |                                                   |                  |
| PhenoAge                                        | -24.5%                                      | (-274.6% 172.6%) | 2.1%                                           | (-9.8% 16.7%)          | 0.1%                                              | (-84.3% 59.8%)   |
| GrimAge                                         | 24.2%                                       | (-117.2% 213.7%) | 3.1%                                           | (-20.3% 20.8%)         | 17.5%                                             | (-114.6% 239.1%) |
| GrimAge2                                        | 43.2%                                       | (-251.1% 286.3%) | <b>18.7%</b>                                   | <b>(2.3% 44.1%)</b>    | 24.9%                                             | (-119.9% 312.7%) |
| <b>Pace of aging clock</b>                      |                                             |                  |                                                |                        |                                                   |                  |
| DunedinPoAm                                     | 18.8%                                       | (-38.2% 170.4%)  | <b>15.3%**</b>                                 | <b>(6.0% 34.9%)</b>    | 21.6%                                             | (-112.6% 219.5%) |
| <b>Clocks trained on other aging biomarkers</b> |                                             |                  |                                                |                        |                                                   |                  |
| Yang                                            | 9.8%                                        | (-80.7% 151.7%)  | 1.8%                                           | (-9.2% 14.3%)          | -1.0%                                             | (-97.3% 92.4%)   |
| Telomere                                        | -89.1%                                      | (-656.7% 424.6%) | 3.1%                                           | (-16.4% 18.4%)         | 8.2%                                              | (-179.9% 320.9%) |
| <b>Behavioral/Lifestyle measures</b>            |                                             |                  |                                                |                        |                                                   |                  |
| Sedentary behavior                              | 33.1%                                       | (-81.6% 184.1%)  | <b>16.1%</b>                                   | <b>(2.3% 38.9%)</b>    | 15.5%                                             | (-171.0% 147.2%) |
| Healthy eating index                            | 2.1%                                        | (-18.7% 28.5%)   | 2.1%                                           | (-3.9% 11.7%)          | 0.6%                                              | (-31.6% 31.8%)   |
| Smoking pack years                              | -28.4%                                      | (-272.6% 193.4%) | <b>-7.0%</b>                                   | <b>(-17.4% - 1.9%)</b> | -3.4%                                             | (-62.0% 48.6%)   |
| Alcohol drinker                                 | 30.1%                                       | (-133.1% 195.9%) | <b>13.4%</b>                                   | <b>(2.2% 40.2%)</b>    | 23.1%                                             | (-307.2% 459.0%) |
| <b>Anthropometric measures</b>                  |                                             |                  |                                                |                        |                                                   |                  |
| Waist to thigh ratio                            | -21.7%                                      | (-166.9% 1.3%)   | <b>14.9%</b>                                   | <b>(3.3% 45.0%)</b>    | 7.6%                                              | (-98.0% 103.0%)  |
| BMI                                             | 9.0%                                        | (-49.8% 77.3%)   | 1.2%                                           | (-7.8% 10.4%)          | 0.9%                                              | (-16.4% 21.1%)   |
| <b>Clinical used blood Biomarkers</b>           |                                             |                  |                                                |                        |                                                   |                  |
| Total cholesterol                               | 0.0%                                        | (-12.8% 10.2%)   | 0.0%                                           | (-5.4% 8.0%)           | 0.0%                                              | (-23.7% 18.8%)   |
| HDL                                             | 0.0%                                        | (-14.9% 13.8%)   | 6.1%                                           | (-8.1% 26.0%)          | 1.2%                                              | (-57.2% 53.9%)   |
| LDL                                             | 0.5%                                        | (-15.3% 18.3%)   | 0.1%                                           | (-7.3% 10.3%)          | 0.2%                                              | (-40.3% 47.0%)   |
| Glucose                                         | 25.6%                                       | (-90.6% 216.3%)  | 2.2%                                           | (-3.5% 12.4%)          | 6.3%                                              | (-67.0% 91.1%)   |
| C-reactive protein                              | 19.9%                                       | (-61.4% 163.7%)  | 0.2%                                           | (-2.5% 3.5%)           | -0.7%                                             | (-30.5% 29.7%)   |

**Supplementary Table 16. Average mediated proportions for DNA methylation and clinical mediators on the relationship between race and ethnicity and all-cause mortality among men of NHANES 1999-2002 (n=1,230). Bold indicates statistical significance (p-value<0.05), and bold with two asterisks indicates significance passed Bonferroni adjustment (p-value<0.0021).**

|                                                 | Model 1. Black (N=266)<br>vs. White (N=487) |                         | Model 2. Hispanic (N=441)<br>vs. White (N=487) |                   | Model 3. Other races (N=36)<br>vs. White (N=487) |                  |
|-------------------------------------------------|---------------------------------------------|-------------------------|------------------------------------------------|-------------------|--------------------------------------------------|------------------|
|                                                 | Average mediated<br>proportion              | (95% CI)                | Average<br>mediated<br>proportion              | (95% CI)          | Average<br>mediated<br>proportion                | (95% CI)         |
| <b>Chronological age clocks</b>                 |                                             |                         |                                                |                   |                                                  |                  |
| Hannum                                          | <b>-9.1%</b>                                | <b>(-19.5% - 3.1%)</b>  | 6.0%                                           | (-197.8% 177.4%)  | -3.0%                                            | (-142.4% 172.4%) |
| Hovarth                                         | -0.6%                                       | (-6.9% 4.4%)            | 1.1%                                           | (-101.8% 79.8%)   | -0.3%                                            | (-76.2% 61.8%)   |
| Weidner                                         | 0.0%                                        | (-2.0% 1.6%)            | 0.0%                                           | (-43.4% 42.2%)    | 0.0%                                             | (-26.8% 34.2%)   |
| Lin                                             | 0.1%                                        | (-2.9% 3.8%)            | 0.2%                                           | (-71.0% 62.3%)    | 0.0%                                             | (-35.2% 26.5%)   |
| Vidal-Bralo                                     | -3.9%                                       | (-13.1% 1.1%)           | -0.4%                                          | (-65.3% 64.0%)    | 1.1%                                             | (-45.7% 46.4%)   |
| SkinBlood                                       | -0.4%                                       | (-4.7% 1.5%)            | 0.1%                                           | (-58.6% 37.7%)    | -0.5%                                            | (-44.9% 31.7%)   |
| Zhang                                           | -3.8%                                       | (-11.8% 0.8%)           | 0.2%                                           | (-41.4% 36.7%)    | 0.1%                                             | (-34.2% 35.9%)   |
| <b>Physiological functioning clocks</b>         |                                             |                         |                                                |                   |                                                  |                  |
| PhenoAge                                        | 2.7%                                        | (-5.7% 11.8%)           | 11.3%                                          | (-366.7% 298.5%)  | -6.2%                                            | (-320.5% 143.0%) |
| GrimAge                                         | <b>43.9%**</b>                              | <b>(22.0% 92.0%)</b>    | 17.6%                                          | (-937.4% 656.1%)  | 11.1%                                            | (-297.6% 223.7%) |
| GrimAge2                                        | <b>51.0%**</b>                              | <b>(26.9% 95.3%)</b>    | 50.6%                                          | (-848.5% 1216.9%) | 7.1%                                             | (-286.5% 245.1%) |
| <b>Pace of aging clock</b>                      |                                             |                         |                                                |                   |                                                  |                  |
| DunedinPoAm                                     | <b>29.2%**</b>                              | <b>(12.8% 57.8%)</b>    | 38.3%                                          | (-569.0% 753.6%)  | -5.3%                                            | (-297.3% 166.7%) |
| <b>Clocks trained on other aging biomarkers</b> |                                             |                         |                                                |                   |                                                  |                  |
| Yang                                            | 5.9%                                        | (-5.6% 19.1%)           | -0.2%                                          | (-133.1% 151.7%)  | -3.0%                                            | (-67.0% 70.6%)   |
| Telomere                                        | <b>-24.5%**</b>                             | <b>(-46.1% - 11.7%)</b> | 1.1%                                           | (-103.4% 111.3%)  | -3.2%                                            | (-204.3% 111.2%) |
| <b>Behavioral/Lifestyle measures</b>            |                                             |                         |                                                |                   |                                                  |                  |
| Sedentary behavior                              | <b>23.7%**</b>                              | <b>(10.3% 54.7%)</b>    | 11.2%                                          | (-286.8% 252.6%)  | -0.1%                                            | (-113.6% 215.3%) |
| Healthy eating index                            | <b>9.3%</b>                                 | <b>(1.0% 23.7%)</b>     | -1.0%                                          | (-116.8% 104.5%)  | 10.5%                                            | (-242.3% 276.9%) |
| Smoking pack years                              | -6.7%                                       | (-21.4% 1.9%)           | -8.1%                                          | (-320.4% 286.0%)  | 10.3%                                            | (-239.3% 262.0%) |
| Alcohol drinker                                 | 3.7%                                        | (-2.6% 13.4%)           | 0.0%                                           | (-38.9% 49.0%)    | -2.3%                                            | (-103.0% 127.1%) |
| <b>Anthropometric measures</b>                  |                                             |                         |                                                |                   |                                                  |                  |
| Waist to thigh ratio                            | <b>-41.6%**</b>                             | <b>(-113.8%- 18.0%)</b> | 0.6%                                           | (-227.0% 290.1%)  | 9.1%                                             | (-311.9% 286.9%) |
| BMI                                             | -0.1%                                       | (-7.8% 3.9%)            | 0.0%                                           | (-151.1% 142.6%)  | 2.8%                                             | (-124.8% 190.4%) |
| <b>Clinical used blood Biomarkers</b>           |                                             |                         |                                                |                   |                                                  |                  |
| Total cholesterol                               | -1.2%                                       | (-13.1% 6.0%)           | 0.2%                                           | (-62.6% 73.1%)    | 1.7%                                             | (-117.7% 105.1%) |
| HDL                                             | 0.8%                                        | (-14.4% 14.5%)          | 0.0%                                           | (-19.5% 31.9%)    | 0.1%                                             | (-70.6% 29.3%)   |
| LDL                                             | 0.5%                                        | (-10.8% 9.2%)           | 0.6%                                           | (-88.3% 84.2%)    | 1.2%                                             | (-152.5% 137.7%) |
| Glucose                                         | 1.2%                                        | (-1.0% 5.6%)            | 6.1%                                           | (-146.0% 135.5%)  | -1.7%                                            | (-78.1% 68.9%)   |
| C-reactive protein                              | <b>5.8%</b>                                 | <b>(0.3% 18.4%)</b>     | 2.9%                                           | (-89.1% 84.8%)    | 1.2%                                             | (-37.8% 39.2%)   |

**Supplementary Table 17. Average mediated proportions for DNA methylation and clinical mediators on the relationship between education attainment and all-cause mortality among women of NHANES 1999-2002 (n=1,172). Bold indicates statistical significance (p-value<0.05), and bold with two asterisks indicates significance passed Bonferroni adjustment (p-value<0.0021).**

|                                                 | Model 1. Less than high school (N=543) vs. College degree or higher (N=136) |               |               | Model 2. High school graduate/GED (N=271) vs. College degree or higher (N=136) |          |         | Model 3. Some college or associates degree (N=222) vs. College degree or higher (N=136) |          |         |
|-------------------------------------------------|-----------------------------------------------------------------------------|---------------|---------------|--------------------------------------------------------------------------------|----------|---------|-----------------------------------------------------------------------------------------|----------|---------|
|                                                 | Average mediated proportion                                                 | (95% CI)      |               | Average mediated proportion                                                    | (95% CI) |         | Average mediated proportion                                                             | (95% CI) |         |
| <b>Chronological age clocks</b>                 |                                                                             |               |               |                                                                                |          |         |                                                                                         |          |         |
| Hannum                                          | 2.4%                                                                        | (-1.0%        | 11.4%)        | 12.9%                                                                          | (-14.4%  | 71.5%)  | 0.9%                                                                                    | (-70.9%  | 79.8%)  |
| Hovarth                                         | -0.1%                                                                       | (-4.5%        | 2.7%)         | -1.7%                                                                          | (-36.6%  | 8.1%)   | -8.5%                                                                                   | (-144.7% | 150.9%) |
| Weidner                                         | -0.9%                                                                       | (-8.9%        | 1.8%)         | -3.1%                                                                          | (-64.0%  | 28.0%)  | -5.2%                                                                                   | (-96.6%  | 86.8%)  |
| Lin                                             | -0.5%                                                                       | (-7.5%        | 4.6%)         | -1.2%                                                                          | (-24.8%  | 13.3%)  | -2.1%                                                                                   | (-88.4%  | 42.6%)  |
| Vidal-Bralo                                     | -2.4%                                                                       | (-13.8%       | 1.5%)         | -2.3%                                                                          | (-27.5%  | 6.4%)   | -5.9%                                                                                   | (-199.9% | 93.7%)  |
| SkinBlood                                       | 0.7%                                                                        | (-2.3%        | 7.8%)         | 3.0%                                                                           | (-19.0%  | 43.2%)  | -0.3%                                                                                   | (-31.1%  | 20.0%)  |
| Zhang                                           | 1.2%                                                                        | (-3.4%        | 9.4%)         | 1.8%                                                                           | (-6.7%   | 32.5%)  | -0.8%                                                                                   | (-71.7%  | 41.7%)  |
| <b>Physiological functioning clocks</b>         |                                                                             |               |               |                                                                                |          |         |                                                                                         |          |         |
| PhenoAge                                        | <b>6.7%</b>                                                                 | <b>(0.3%</b>  | <b>26.2%)</b> | 5.0%                                                                           | (-19.2%  | 45.7%)  | 1.8%                                                                                    | (-88.1%  | 114.6%) |
| GrimAge                                         | <b>19.7%**</b>                                                              | <b>(7.7%</b>  | <b>45.4%)</b> | 17.6%                                                                          | (-4.3%   | 129.4%) | 25.6%                                                                                   | (-216.3% | 251.6%) |
| GrimAge2                                        | <b>26.5%**</b>                                                              | <b>(11.8%</b> | <b>63.2%)</b> | 19.2%                                                                          | (-17.5%  | 135.0%) | 31.8%                                                                                   | (-200.3% | 337.2%) |
| <b>Pace of aging clock</b>                      |                                                                             |               |               |                                                                                |          |         |                                                                                         |          |         |
| DunedinPoAm                                     | <b>11.0%**</b>                                                              | <b>(3.3%</b>  | <b>26.6%)</b> | 10.5%                                                                          | (-5.7%   | 54.5%)  | 15.7%                                                                                   | (-175.7% | 152.1%) |
| <b>Clocks trained on other aging biomarkers</b> |                                                                             |               |               |                                                                                |          |         |                                                                                         |          |         |
| Yang                                            | -1.8%                                                                       | (-7.1%        | 2.2%)         | 1.6%                                                                           | (-10.3%  | 28.3%)  | 0.7%                                                                                    | (-23.2%  | 20.0%)  |
| Telomere                                        | <b>7.1%</b>                                                                 | <b>(1.4%</b>  | <b>19.5%)</b> | 5.1%                                                                           | (-9.1%   | 45.8%)  | 7.7%                                                                                    | (-71.4%  | 131.3%) |
| <b>Behavioral/Lifestyle measures</b>            |                                                                             |               |               |                                                                                |          |         |                                                                                         |          |         |
| Sedentary behavior                              | <b>20.1%</b>                                                                | <b>(4.3%</b>  | <b>70.3%)</b> | 16.9%                                                                          | (-2.6%   | 92.7%)  | 3.5%                                                                                    | (-73.9%  | 90.7%)  |
| Healthy eating index                            | 0.4%                                                                        | (-13.1%       | 19.1%)        | 1.0%                                                                           | (-65.6%  | 56.7%)  | 0.4%                                                                                    | (-71.5%  | 73.1%)  |
| Smoking pack years                              | <b>7.6%</b>                                                                 | <b>(1.0%</b>  | <b>19.3%)</b> | 5.2%                                                                           | (-17.5%  | 65.9%)  | 6.4%                                                                                    | (-89.5%  | 86.0%)  |
| Alcohol drinker                                 | 3.7%                                                                        | (-8.9%        | 16.8%)        | 16.3%                                                                          | (-6.0%   | 75.6%)  | -0.9%                                                                                   | (-38.1%  | 24.7%)  |
| <b>Anthropometric measures</b>                  |                                                                             |               |               |                                                                                |          |         |                                                                                         |          |         |
| Waist to thigh ratio                            | 4.8%                                                                        | (-1.0%        | 23.4%)        | -0.6%                                                                          | (-26.2%  | 19.5%)  | -1.7%                                                                                   | (-76.0%  | 36.9%)  |
| BMI                                             | -0.7%                                                                       | (-12.9%       | 12.8%)        | 5.6%                                                                           | (-3.1%   | 32.8%)  | 0.8%                                                                                    | (-32.3%  | 33.2%)  |
| <b>Clinical used blood Biomarkers</b>           |                                                                             |               |               |                                                                                |          |         |                                                                                         |          |         |
| Total cholesterol                               | 0.0%                                                                        | (-6.6%        | 4.9%)         | -5.2%                                                                          | (-59.8%  | 42.9%)  | -2.2%                                                                                   | (-92.2%  | 53.3%)  |
| HDL                                             | 3.0%                                                                        | (-6.0%        | 16.8%)        | 0.1%                                                                           | (-12.2%  | 13.0%)  | -0.1%                                                                                   | (-30.5%  | 38.4%)  |
| LDL                                             | 0.1%                                                                        | (-9.4%        | 6.5%)         | -5.5%                                                                          | (-73.1%  | 25.2%)  | -0.9%                                                                                   | (-70.8%  | 72.4%)  |
| Glucose                                         | 1.4%                                                                        | (-4.2%        | 10.5%)        | -3.0%                                                                          | (-51.9%  | 17.1%)  | 0.3%                                                                                    | (-71.7%  | 69.5%)  |
| C-reactive protein                              | <b>3.2%</b>                                                                 | <b>(0.5%</b>  | <b>9.9%)</b>  | 6.8%                                                                           | (-3.3%   | 33.4%)  | 4.0%                                                                                    | (-66.4%  | 65.8%)  |

**Supplementary Table 18. Average mediated proportions for DNA methylation and clinical mediators on the relationship between education attainment and all-cause mortality among men of NHANES 1999-2002 (n=1,230). Bold indicates statistical significance (p-value<0.05), and bold with two asterisks indicates significance passed Bonferroni adjustment (p-value<0.0021).**

|                                                 | Model 1. Less than high school (N=553) vs. College degree or higher (N=234) |               |               | Model 2. High school graduate/GED (N=225) vs. College degree or higher (N=234) |              |               | Model 3. Some college or associates degree (N=218) vs. College degree or higher (N=234) |               |               |
|-------------------------------------------------|-----------------------------------------------------------------------------|---------------|---------------|--------------------------------------------------------------------------------|--------------|---------------|-----------------------------------------------------------------------------------------|---------------|---------------|
|                                                 | Average mediated proportion                                                 | (95% CI)      |               | Average mediated proportion                                                    | (95% CI)     |               | Average mediated proportion                                                             | (95% CI)      |               |
| <b>Chronological age clocks</b>                 |                                                                             |               |               |                                                                                |              |               |                                                                                         |               |               |
| Hannum                                          | 1.2%                                                                        | (-0.3%        | 4.1%)         | 1.5%                                                                           | (-3.0%       | 8.3%)         | -0.2%                                                                                   | (-11.2%       | 10.2%)        |
| Hovarth                                         | 0.0%                                                                        | (-2.3%        | 1.8%)         | -1.9%                                                                          | (-10.6%      | 2.2%)         | -2.4%                                                                                   | (-13.7%       | 1.6%)         |
| Weidner                                         | 0.0%                                                                        | (-2.4%        | 2.3%)         | -0.3%                                                                          | (-6.2%       | 2.5%)         | 0.0%                                                                                    | (-4.5%        | 4.3%)         |
| Lin                                             | -0.1%                                                                       | (-2.3%        | 0.9%)         | -1.3%                                                                          | (-8.3%       | 1.7%)         | 0.8%                                                                                    | (-5.1%        | 9.7%)         |
| Vidal-Bralo                                     | 0.0%                                                                        | (-1.9%        | 1.7%)         | 0.0%                                                                           | (-3.0%       | 2.3%)         | 0.0%                                                                                    | (-4.6%        | 4.6%)         |
| SkinBlood                                       | 0.1%                                                                        | (-1.0%        | 2.1%)         | 0.2%                                                                           | (-3.0%       | 4.9%)         | 0.0%                                                                                    | (-6.5%        | 6.4%)         |
| Zhang                                           | 0.0%                                                                        | (-1.6%        | 1.8%)         | -1.1%                                                                          | (-6.8%       | 2.2%)         | 0.3%                                                                                    | (-13.4%       | 7.5%)         |
| <b>Physiological functioning clocks</b>         |                                                                             |               |               |                                                                                |              |               |                                                                                         |               |               |
| PhenoAge                                        | <b>6.7%</b>                                                                 | <b>(1.6%</b>  | <b>15.0%)</b> | 1.9%                                                                           | (-2.2%       | 10.7%)        | 3.6%                                                                                    | (-5.4%        | 18.0%)        |
| GrimAge                                         | <b>25.7%**</b>                                                              | <b>(13.7%</b> | <b>40.3%)</b> | <b>18.7%**</b>                                                                 | <b>(4.3%</b> | <b>45.0%)</b> | <b>32.2%**</b>                                                                          | <b>(15.6%</b> | <b>80.2%)</b> |
| GrimAge2                                        | <b>28.9%**</b>                                                              | <b>(14.4%</b> | <b>46.8%)</b> | <b>23.3%**</b>                                                                 | <b>(8.5%</b> | <b>53.4%)</b> | <b>32.6%**</b>                                                                          | <b>(13.8%</b> | <b>82.8%)</b> |
| <b>Pace of aging clock</b>                      |                                                                             |               |               |                                                                                |              |               |                                                                                         |               |               |
| DunedinPoAm                                     | <b>15.1%**</b>                                                              | <b>(5.4%</b>  | <b>28.8%)</b> | 11.5%                                                                          | (-1.1%       | 28.6%)        | <b>25.0%</b>                                                                            | <b>(8.9%</b>  | <b>60.0%)</b> |
| <b>Clocks trained on other aging biomarkers</b> |                                                                             |               |               |                                                                                |              |               |                                                                                         |               |               |
| Yang                                            | -0.2%                                                                       | (-4.3%        | 3.5%)         | 0.2%                                                                           | (-5.0%       | 6.2%)         | 0.1%                                                                                    | (-3.4%        | 4.9%)         |
| Telomere                                        | 4.3%                                                                        | (-0.1%        | 11.1%)        | 5.0%                                                                           | (-2.7%       | 15.2%)        | 1.8%                                                                                    | (-5.2%        | 12.7%)        |
| <b>Behavioral/Lifestyle measures</b>            |                                                                             |               |               |                                                                                |              |               |                                                                                         |               |               |
| Sedentary behavior                              | 6.3%                                                                        | (-2.7%        | 16.8%)        | <b>23.6%</b>                                                                   | <b>(5.8%</b> | <b>50.3%)</b> | 5.8%                                                                                    | (-2.7%        | 26.9%)        |
| Healthy eating index                            | 3.0%                                                                        | (-12.2%       | 21.4%)        | 0.2%                                                                           | (-21.6%      | 18.1%)        | 4.5%                                                                                    | (-4.7%        | 17.7%)        |
| Smoking pack years                              | <b>12.9%**</b>                                                              | <b>(5.2%</b>  | <b>25.5%)</b> | <b>12.9%**</b>                                                                 | <b>(4.1%</b> | <b>29.4%)</b> | <b>22.1%**</b>                                                                          | <b>(7.8%</b>  | <b>66.7%)</b> |
| Alcohol drinker                                 | 1.1%                                                                        | (-5.2%        | 8.4%)         | -2.2%                                                                          | (-10.9%      | 7.9%)         | <b>6.8%</b>                                                                             | <b>(0.1%</b>  | <b>29.2%)</b> |
| <b>Anthropometric measures</b>                  |                                                                             |               |               |                                                                                |              |               |                                                                                         |               |               |
| Waist to thigh ratio                            | <b>6.7%</b>                                                                 | <b>(0.7%</b>  | <b>15.8%)</b> | 7.0%                                                                           | (-1.0%       | 18.6%)        | <b>13.8%</b>                                                                            | <b>(0.4%</b>  | <b>37.9%)</b> |
| BMI                                             | 0.1%                                                                        | (-2.9%        | 3.6%)         | -0.1%                                                                          | (-12.5%      | 10.1%)        | 10.8%                                                                                   | (-6.3%        | 57.0%)        |
| <b>Clinical used blood Biomarkers</b>           |                                                                             |               |               |                                                                                |              |               |                                                                                         |               |               |
| Total cholesterol                               | 0.0%                                                                        | (-2.3%        | 2.0%)         | 2.7%                                                                           | (-9.5%       | 14.8%)        | -1.7%                                                                                   | (-18.1%       | 4.1%)         |
| HDL                                             | -1.1%                                                                       | (-8.6%        | 3.2%)         | -1.6%                                                                          | (-12.8%      | 4.6%)         | -1.9%                                                                                   | (-11.8%       | 14.0%)        |
| LDL                                             | 0.0%                                                                        | (-1.9%        | 2.1%)         | 2.3%                                                                           | (-12.5%      | 15.1%)        | -3.2%                                                                                   | (-17.6%       | 3.0%)         |
| Glucose                                         | <b>3.3%</b>                                                                 | <b>(0.6%</b>  | <b>8.5%)</b>  | -0.4%                                                                          | (-7.6%       | 5.8%)         | 0.0%                                                                                    | (-4.7%        | 2.8%)         |
| C-reactive protein                              | 1.2%                                                                        | (-2.6%        | 5.8%)         | -0.6%                                                                          | (-6.9%       | 4.3%)         | -0.6%                                                                                   | (-9.0%        | 4.8%)         |

**Supplementary Table 19. Average mediated proportions for DNA methylation and clinical mediators on the relationship between household income and all-cause mortality among women of NHANES 1999-2002 (n=1,172). Bold indicates statistical significance (p-value<0.05), and bold with two asterisks indicates significance passed Bonferroni adjustment (p-value<0.0021).**

|                                                 | Model 1. PIR<1 (N=202)<br>vs. PIR 5+ (N= 175) |                      | Model 2. PIR 1-2 (N=355)<br>vs. PIR 5+ (N=175) |                       | Model 3. PIR 2-5 (N=440)<br>vs. PIR 5+ (N=175) |                     |
|-------------------------------------------------|-----------------------------------------------|----------------------|------------------------------------------------|-----------------------|------------------------------------------------|---------------------|
|                                                 | Average mediated<br>proportion                | (95% CI)             | Average<br>mediated<br>proportion              | (95% CI)              | Average mediated<br>proportion                 | (95% CI)            |
| <b>Chronological age clocks</b>                 |                                               |                      |                                                |                       |                                                |                     |
| Hannum                                          | 4.2%                                          | (-6.0% 18.0%)        | 4.6%                                           | (-14.2% 32.9%)        | 0.0%                                           | (-276.5% 257.1%)    |
| Hovarth                                         | -0.2%                                         | (-8.2% 4.9%)         | 1.7%                                           | (-23.4% 26.4%)        | 0.2%                                           | (-82.7% 75.4%)      |
| Weidner                                         | 0.9%                                          | (-3.4% 7.9%)         | 1.9%                                           | (-32.3% 30.7%)        | 0.5%                                           | (-71.0% 102.8%)     |
| Lin                                             | 0.9%                                          | (-5.6% 9.9%)         | -1.4%                                          | (-17.7% 12.3%)        | 0.3%                                           | (-127.4% 89.0%)     |
| Vidal-Bralo                                     | -2.5%                                         | (-16.6% 1.2%)        | 6.8%                                           | (-19.5% 45.8%)        | -0.1%                                          | (-93.6% 99.4%)      |
| SkinBlood                                       | -3.4%                                         | (-22.5% 1.2%)        | -0.7%                                          | (-19.2% 10.8%)        | -0.4%                                          | (-65.4% 61.6%)      |
| Zhang                                           | -3.1%                                         | (-21.0% 3.7%)        | -2.6%                                          | (-36.5% 10.6%)        | 0.1%                                           | (-53.9% 59.4%)      |
| <b>Physiological functioning clocks</b>         |                                               |                      |                                                |                       |                                                |                     |
| PhenoAge                                        | 4.2%                                          | (-2.4% 20.5%)        | 19.8%                                          | (-9.0% 97.8%)         | 2.0%                                           | (-287.1% 178.2%)    |
| GrimAge                                         | <b>47.7%**</b>                                | <b>(23.5% 86.2%)</b> | <b>43.4%</b>                                   | <b>(11.0% 265.5%)</b> | 44.9%                                          | (-800.3% 1444.1%)   |
| GrimAge2                                        | <b>48.1%**</b>                                | <b>(22.9% 85.7%)</b> | <b>51.6%</b>                                   | <b>(18.6% 221.3%)</b> | 51.3%                                          | (-1,069.7% 1073.6%) |
| <b>Pace of aging clock</b>                      |                                               |                      |                                                |                       |                                                |                     |
| DunedinPoAm                                     | <b>21.4%</b>                                  | <b>(5.5% 50.5%)</b>  | 22.4%                                          | (-16.8% 100.7%)       | 19.2%                                          | (-549.2% 536.7%)    |
| <b>Clocks trained on other aging biomarkers</b> |                                               |                      |                                                |                       |                                                |                     |
| Yang                                            | -0.1%                                         | (-11.5% 7.7%)        | 0.0%                                           | (-13.8% 6.5%)         | 0.2%                                           | (-62.8% 92.7%)      |
| Telomere                                        | 2.8%                                          | (-2.1% 12.8%)        | 6.4%                                           | (-15.3% 49.2%)        | 3.6%                                           | (-211.3% 328.8%)    |
| <b>Behavioral/Lifestyle measures</b>            |                                               |                      |                                                |                       |                                                |                     |
| Sedentary behavior                              | 19.5%                                         | (-9.2% 62.4%)        | 27.9%                                          | (-32.2% 214.1%)       | 8.5%                                           | (-412.4% 514.2%)    |
| Healthy eating index                            | 7.6%                                          | (-25.7% 39.3%)       | -1.2%                                          | (-33.9% 27.1%)        | -3.4%                                          | (-169.2% 173.0%)    |
| Smoking pack years                              | <b>16.9%**</b>                                | <b>(6.1% 36.0%)</b>  | 13.1%                                          | (-15.8% 104.0%)       | 10.5%                                          | (-188.8% 248.2%)    |
| Alcohol drinker                                 | -6.7%                                         | (-46.2% 18.1%)       | 19.3%                                          | (-34.5% 195.8%)       | 1.6%                                           | (-314.5% 240.9%)    |
| <b>Anthropometric measures</b>                  |                                               |                      |                                                |                       |                                                |                     |
| Waist to thigh ratio                            | 1.2%                                          | (-15.4% 13.7%)       | 10.2%                                          | (-49.8% 86.7%)        | 2.4%                                           | (-309.0% 287.5%)    |
| BMI                                             | -1.7%                                         | (-30.0% 17.9%)       | 11.9%                                          | (-27.1% 62.9%)        | 2.7%                                           | (-189.6% 266.2%)    |
| <b>Clinical used blood Biomarkers</b>           |                                               |                      |                                                |                       |                                                |                     |
| Total cholesterol                               | -0.1%                                         | (-6.3% 3.2%)         | 0.0%                                           | (-11.4% 9.4%)         | -1.2%                                          | (-127.9% 117.1%)    |
| HDL                                             | -7.2%                                         | (-35.8% 12.9%)       | 8.5%                                           | (-33.1% 56.3%)        | 3.8%                                           | (-221.5% 189.4%)    |
| LDL                                             | -3.3%                                         | (-15.9% 2.9%)        | 0.1%                                           | (-13.5% 13.3%)        | -1.1%                                          | (-204.1% 179.6%)    |
| Glucose                                         | <b>7.0%</b>                                   | <b>(-0.7% 24.1%)</b> | 4.1%                                           | (-25.9% 65.3%)        | -14.7%                                         | (-565.7% 526.1%)    |
| C-reactive protein                              | <b>1.4%</b>                                   | <b>(-0.6% 5.1%)</b>  | 11.7%                                          | (-55.4% 85.2%)        | 0.8%                                           | (-141.9% 114.4%)    |

**Supplementary Table 20. Average mediated proportions for DNA methylation and clinical mediators on the relationship between household income and all-cause mortality among men of NHANES 1999-2002 (n=1,230). Bold indicates statistical significance (p-value<0.05), and bold with two asterisks indicates significance passed Bonferroni adjustment (p-value<0.0021).**

|                                                 | Model 1. PIR<1 (N=171)<br>vs. PIR 5+ (N=224) |                      | Model 2. PIR 1-2 (N=352)<br>vs. PIR 5+ (N=224) |                      | Model 3. PIR 2-5 (N=483)<br>vs. PIR 5+ (N= 224) |                     |
|-------------------------------------------------|----------------------------------------------|----------------------|------------------------------------------------|----------------------|-------------------------------------------------|---------------------|
|                                                 | Average mediated<br>proportion               | (95% CI)             | Average mediated<br>proportion                 | (95% CI)             | Average mediated<br>proportion                  | (95% CI)            |
| <b>Chronological age clocks</b>                 |                                              |                      |                                                |                      |                                                 |                     |
| Hannum                                          | 1.9%                                         | (-1.0% 7.1%)         | 1.8%                                           | (-0.7% 5.4%)         | -1.9%                                           | (-8.4% 1.3%)        |
| Hovarth                                         | 0.3%                                         | (-1.1% 3.6%)         | -0.5%                                          | (-3.1% 1.2%)         | -1.2%                                           | (-6.9% 2.3%)        |
| Weidner                                         | -0.3%                                        | (-5.5% 2.5%)         | 0.0%                                           | (-0.9% 1.1%)         | 0.0%                                            | (-2.4% 2.4%)        |
| Lin                                             | 0.0%                                         | (-2.7% 3.1%)         | -0.1%                                          | (-1.9% 1.1%)         | -1.1%                                           | (-5.9% 0.9%)        |
| Vidal-Bralo                                     | 0.1%                                         | (-1.9% 3.0%)         | -0.1%                                          | (-2.0% 1.1%)         | -0.5%                                           | (-4.8% 1.4%)        |
| SkinBlood                                       | -0.5%                                        | (-7.9% 4.5%)         | 0.0%                                           | (-0.8% 0.8%)         | -0.9%                                           | (-6.2% 2.1%)        |
| Zhang                                           | -0.1%                                        | (-4.2% 2.8%)         | -0.2%                                          | (-1.5% 0.5%)         | -1.6%                                           | (-7.1% 2.0%)        |
| <b>Physiological functioning clocks</b>         |                                              |                      |                                                |                      |                                                 |                     |
| PhenoAge                                        | <b>7.1%</b>                                  | <b>(1.1% 15.9%)</b>  | <b>4.1%</b>                                    | <b>(0.7% 9.0%)</b>   | 1.5%                                            | (-2.8% 9.7%)        |
| GrimAge                                         | <b>19.3%**</b>                               | <b>(9.4% 32.5%)</b>  | <b>18.9%**</b>                                 | <b>(10.6% 31.7%)</b> | 12.0%                                           | (-1.1% 34.2%)       |
| GrimAge2                                        | <b>24.4%**</b>                               | <b>(13.3% 40.3%)</b> | <b>21.7%**</b>                                 | <b>(10.8% 35.8%)</b> | 13.0%                                           | (-0.5% 35.8%)       |
| <b>Pace of aging clock</b>                      |                                              |                      |                                                |                      |                                                 |                     |
| DunedinPoAm                                     | <b>13.7%**</b>                               | <b>(4.5% 27.2%)</b>  | <b>11.4%**</b>                                 | <b>(4.5% 22.8%)</b>  | 9.2%                                            | (-0.0% 27.7%)       |
| <b>Clocks trained on other aging biomarkers</b> |                                              |                      |                                                |                      |                                                 |                     |
| Yang                                            | -0.3%                                        | (-6.1% 4.6%)         | 3.0%                                           | (-0.1% 8.4%)         | 0.0%                                            | (-3.0% 2.5%)        |
| Telomere                                        | 0.8%                                         | (-4.1% 7.4%)         | <b>4.3%</b>                                    | <b>(0.2% 10.5%)</b>  | 1.1%                                            | (-5.1% 8.4%)        |
| <b>Behavioral/Lifestyle measures</b>            |                                              |                      |                                                |                      |                                                 |                     |
| Sedentary behavior                              | <b>20.6%**</b>                               | <b>(6.4% 37.8%)</b>  | <b>7.2%</b>                                    | <b>(0.5% 15.8%)</b>  | 7.0%                                            | (-0.4% 24.5%)       |
| Healthy eating index                            | 2.7%                                         | (-5.9% 13.5%)        | 4.0%                                           | (-3.7% 11.4%)        | 2.6%                                            | (-4.1% 16.3%)       |
| Smoking pack years                              | 4.0%                                         | (-1.4% 10.1%)        | <b>10.6%**</b>                                 | <b>(4.4% 19.4%)</b>  | <b>11.3%**</b>                                  | <b>(3.6% 27.6%)</b> |
| Alcohol drinker                                 | 2.2%                                         | (-3.7% 9.9%)         | -1.9%                                          | (-9.1% 3.9%)         | 2.6%                                            | (-8.3% 15.3%)       |
| <b>Anthropometric measures</b>                  |                                              |                      |                                                |                      |                                                 |                     |
| Waist to thigh ratio                            | <b>9.5%</b>                                  | <b>(1.4% 20.9%)</b>  | 5.5%                                           | (-0.4% 13.1%)        | 6.5%                                            | (-0.2% 17.4%)       |
| BMI                                             | 0.6%                                         | (-4.7% 7.7%)         | <b>-4.0%</b>                                   | <b>(-9.5% -0.8%)</b> | 2.0%                                            | (-3.4% 13.4%)       |
| <b>Clinical used blood Biomarkers</b>           |                                              |                      |                                                |                      |                                                 |                     |
| Total cholesterol                               | 0.3%                                         | (-5.9% 8.3%)         | 1.0%                                           | (-2.1% 6.9%)         | -0.8%                                           | (-7.2% 3.4%)        |
| HDL                                             | 1.2%                                         | (-4.2% 7.2%)         | -0.8%                                          | (-6.2% 1.8%)         | 0.1%                                            | (-6.4% 7.7%)        |
| LDL                                             | 0.0%                                         | (-5.2% 4.2%)         | 0.5%                                           | (-2.0% 4.7%)         | -1.7%                                           | (-11.1% 2.3%)       |
| Glucose                                         | <b>6.1%</b>                                  | <b>(0.7% 14.5%)</b>  | 0.5%                                           | (-0.6% 2.8%)         | 0.0%                                            | (-1.9% 3.0%)        |
| C-reactive protein                              | <b>4.3%</b>                                  | <b>(0.6% 10.6%)</b>  | 2.6%                                           | (0.0% 6.7%)          | 1.6%                                            | (-0.5% 6.6%)        |
