# Supplementary material
Source: publisher site journal article supplement (doi:10.18632/aging.206377)
Supplement: Supplementary file 3 [file aging-v18i1-206377-supplementary-material-SD12.xlsx]

## Sheet: Supplementary Table 22
Supplementary Table 22. Average mediated proportions for DNA methylation and clinical mediators on the relationship between occupation status and all-cause mortality among men of NHANES 1999-2002 (n=1,230). Bold indicates statistical significance (p-value<0.05), and bold with two asterisks indicates significance passed Bonferroni adjustment (p-value<0.0021).
	Model 1. Semi-routine white collar (N=111) vs. White collar (N=291)				Model 2. High skill blue collar (N=281) vs. White collar (N=291)				Model 3. Semi-routine blue collar (N=516) vs. White collar (N=291)				Model 4. Never worked (N=31) vs. White collar (N=291)
	Average mediated proportion	(95% CI)			Average mediated proportion	(95% CI)			Average mediated proportion	(95% CI)			Average mediated proportion	(95% CI)
Chronological age clocks
Hannum	-0.0313557	-0.298573	0.0768434		0.0223592	-0.0584862	0.106569		0.0017327	-0.0276949	0.0325978		0.0471948	-0.146964	0.404871
Hovarth	0.0062545	-0.08357	0.135096		-0.0101575	-0.0755905	0.0301006		-0.00437447	-0.0456752	0.0119992		0.0454418	-0.0881167	0.300915
Weidner	-0.00632522	-0.101281	0.0402909		0.00154112	-0.0217728	0.0429727		0.000185862	-0.0165395	0.0214268		0.000312082	-0.233049	0.151325
Lin	3.94999e-05	-0.0617858	0.0597003		-0.012127	-0.0786328	0.0273529		0.000478722	-0.0212209	0.0309899		-3.1268e-05	-0.166771	0.141651
Vidal-Bralo	1.73052e-05	-0.0637517	0.0514133		-0.00251084	-0.0512766	0.0335611		-0.000712317	-0.0245532	0.0169396		0.00460713	-0.401606	0.301522
SkinBlood	0.00427034	-0.086984	0.102564		0.010604	-0.0286745	0.085391		-0.000142316	-0.022326	0.0220951		0.000187453	-0.293241	0.169944
Zhang	-0.00725314	-0.205888	0.0818185		-0.00352606	-0.0856235	0.0464694		-0.010824	-0.0595125	0.00970443		0.00638643	-0.133492	0.286505
Physiological functioning clocks
PhenoAge	-0.0191503	-0.255218	0.10536		0.041828	-0.013663	0.151773		0.0244856	-0.00559424	0.0759151		0.0851508	-0.0917132	0.540384
GrimAge	0.262598	0.0461401	1.00139		0.353581	0.205931	0.645063		0.271148	0.131661	0.487078		0.245431	-0.0784952	0.591163
GrimAge2	0.260879	0.0660785	0.967652		0.37414	0.199148	0.786232		0.299088	0.149983	0.526167		0.242163	-0.144161	0.717364
Pace of aging clock
DunedinPoAm	0.245398	0.0259184	0.766933		0.183347	0.0602665	0.423483		0.172868	0.0759499	0.342959		0.300187	-0.0227588	1.21139
Clocks trained on other aging biomarkers
Yang	0.00271196	-0.0771251	0.0980525		0.0303105	-0.017258	0.120075		0.00233139	-0.0181865	0.0391775		-0.00969404	-0.15943	0.0572094
Telomere	-0.0429003	-0.513192	0.0919145		0.039348	-0.0648403	0.137144		-0.00285601	-0.0703041	0.046172		0.00281011	-0.370614	0.287134
Behavioral/Lifestyle measures
Sedentary behavior	0.0531897	-0.108507	0.375211		0.198875	0.0324665	0.588875		0.186441	0.0790396	0.418916		0.145905	-0.112124	1.11451
Healthy eating index	0.00170683	-0.0867445	0.0983772		0.130992	0.00736192	0.406162		0.0885488	-0.0493002	0.41146		0.0944194	-0.0565687	0.514824
Smoking pack years	0.216624	0.0583363	1.33387		0.249651	0.0777004	0.662247		0.182232	0.0965522	0.413051		0.10201	-0.413933	0.525292
Alcohol drinker	-0.0549537	-0.550264	0.0901062		0.0114378	-0.0756493	0.13872		0.0429448	-0.00836819	0.187225		0.0815327	-0.194759	0.776432
Anthropometric measures
Waist to thigh ratio	0.100687	-0.0274067	0.510702		0.0570227	-0.0118924	0.196589		0.106292	0.0265317	0.298534		0.130295	-0.0109702	0.869939
BMI	0.0576927	-0.138956	0.453087		-0.00427371	-0.153559	0.0706683		0.00619334	-0.0581327	0.151156		0.0166967	-0.55	0.570406
Clinical used blood Biomarkers
Total cholesterol	0.0170639	-0.0845896	0.25871		-0.00454028	-0.0690494	0.0246525		-0.0121172	-0.0921367	0.0205849		-0.0659801	-0.543999	0.0646683
HDL	0.0134014	-0.0918765	0.13101		-0.00370781	-0.0851899	0.0362063		-0.00821607	-0.0684458	0.0354612		0.00673747	-0.217959	0.184793
LDL	0.0207346	-0.0758928	0.234368		-0.00574559	-0.0807218	0.0342008		-0.0241659	-0.127947	0.0165569		-0.0793091	-0.558314	0.092739
Glucose	-0.00801885	-0.154976	0.0896502		4.22544e-05	-0.0275534	0.0342192		0.0246007	-0.0105752	0.0945914		-0.0256318	-0.571298	0.191099
C-reactive protein	0.0719578	-0.169548	0.444942		0.0491098	-0.00166495	0.17467		0.0186641	-0.0393782	0.0836493		-0.00680898	-0.0963537	0.0430534
