# Supplementary material
Source: publisher site journal article supplement (doi:10.18632/aging.206377)
Supplement: Supplementary file 4 [file aging-v18i1-206377-supplementary-material-SD13.pdf]

**Supplementary Table 23. Average mediated proportions for DNA methylation and clinical mediators on the relationship between education attainment and all-cause mortality among Black participants of NHANES 1999-2002 (n=516). Bold indicates statistical significance (p-value<0.05), and bold with two asterisks indicates significance passed Bonferroni adjustment (p-value<0.0021).**

|                                                 | Model 1. Less than high school (N=259) vs. College degree or higher (N=64) |               |               | Model 2. High school graduate/GED (N=105) vs. College degree or higher (N=64) |              |                | Model 3. Some college or associates degree (N=88) vs. College degree or higher (N=64) |          |         |
|-------------------------------------------------|----------------------------------------------------------------------------|---------------|---------------|-------------------------------------------------------------------------------|--------------|----------------|---------------------------------------------------------------------------------------|----------|---------|
|                                                 | Average mediated proportion                                                | (95% CI)      |               | Average mediated proportion                                                   | (95% CI)     |                | Average mediated proportion                                                           | (95% CI) |         |
| <b>Chronological age clocks</b>                 |                                                                            |               |               |                                                                               |              |                |                                                                                       |          |         |
| Hannum                                          | <b>16.2%</b>                                                               | <b>(3.1%</b>  | <b>50.7%)</b> | <b>45.4%</b>                                                                  | <b>(8.0%</b> | <b>358.6%)</b> | 40.3%                                                                                 | (-592.4% | 671.8%) |
| Hovarth                                         | 2.4%                                                                       | (-3.3%        | 16.7%)        | 18.3%                                                                         | (-11.9%      | 77.7%)         | 10.4%                                                                                 | (-172.7% | 219.2%) |
| Weidner                                         | 0.3%                                                                       | (-3.0%        | 5.1%)         | 2.4%                                                                          | (-8.0%       | 20.3%)         | 6.9%                                                                                  | (-120.9% | 148.4%) |
| Lin                                             | 0.6%                                                                       | (-4.0%        | 9.8%)         | 7.7%                                                                          | (-14.2%      | 43.1%)         | 4.3%                                                                                  | (-72.6%  | 126.0%) |
| Vidal-Bralo                                     | 2.4%                                                                       | (-2.8%        | 15.3%)        | 7.7%                                                                          | (-22.8%      | 50.8%)         | 0.2%                                                                                  | (-61.9%  | 70.9%)  |
| SkinBlood                                       | 3.1%                                                                       | (-0.9%        | 14.1%)        | 16.0%                                                                         | (-15.0%      | 117.6%)        | 2.2%                                                                                  | (-215.5% | 177.3%) |
| Zhang                                           | 5.3%                                                                       | (-3.4%        | 23.5%)        | 10.3%                                                                         | (-19.1%      | 82.6%)         | 16.5%                                                                                 | (-377.7% | 283.9%) |
| <b>Physiological functioning clocks</b>         |                                                                            |               |               |                                                                               |              |                |                                                                                       |          |         |
| PhenoAge                                        | 7.6%                                                                       | (-1.4%        | 28.6%)        | 16.8%                                                                         | (-30.2%      | 120.6%)        | 4.8%                                                                                  | (-192.6% | 229.6%) |
| GrimAge                                         | <b>24.5%</b>                                                               | <b>(10.0%</b> | <b>65.6%)</b> | 22.6%                                                                         | (-21.4%      | 133.0%)        | 35.5%                                                                                 | (-409.4% | 414.5%) |
| GrimAge2                                        | <b>29.9%</b>                                                               | <b>(12.0%</b> | <b>86.5%)</b> | 30.2%                                                                         | (-13.6%      | 215.3%)        | 37.7%                                                                                 | (-344.5% | 432.1%) |
| <b>Pace of aging clock</b>                      |                                                                            |               |               |                                                                               |              |                |                                                                                       |          |         |
| DunedinPoAm                                     | <b>9.4%</b>                                                                | <b>(1.7%</b>  | <b>28.4%)</b> | 16.8%                                                                         | (-44.2%      | 124.8%)        | 40.8%                                                                                 | (-397.2% | 650.4%) |
| <b>Clocks trained on other aging biomarkers</b> |                                                                            |               |               |                                                                               |              |                |                                                                                       |          |         |
| Yang                                            | 1.6%                                                                       | (-1.6%        | 9.5%)         | 5.7%                                                                          | (-31.6%      | 66.2%)         | 0.5%                                                                                  | (-102.1% | 229.6%) |
| Telomere                                        | <b>18.0%</b>                                                               | <b>(5.2%</b>  | <b>55.6%)</b> | 55.5%                                                                         | (-95.0%      | 323.9%)        | 25.4%                                                                                 | (-556.8% | 517.2%) |
| <b>Behavioral/Lifestyle measures</b>            |                                                                            |               |               |                                                                               |              |                |                                                                                       |          |         |
| Sedentary behavior                              | 7.2%                                                                       | (-1.8%        | 38.4%)        | 9.3%                                                                          | (-4.3%       | 74.3%)         | 2.9%                                                                                  | (-180.9% | 183.6%) |
| Healthy eating index                            | <b>6.7%</b>                                                                | <b>(0.4%</b>  | <b>26.0%)</b> | 5.8%                                                                          | (-15.2%      | 78.5%)         | 17.1%                                                                                 | (-430.1% | 401.6%) |
| Smoking pack years                              | <b>4.4%</b>                                                                | <b>(0.8%</b>  | <b>18.8%)</b> | 6.3%                                                                          | (-49.7%      | 123.3%)        | 0.9%                                                                                  | (-140.8% | 162.7%) |
| Alcohol drinker                                 | 0.7%                                                                       | (-5.1%        | 9.9%)         | -2.6%                                                                         | (-56.4%      | 22.0%)         | -8.3%                                                                                 | (-234.8% | 198.1%) |
| <b>Anthropometric measures</b>                  |                                                                            |               |               |                                                                               |              |                |                                                                                       |          |         |
| Waist to thigh ratio                            | 8.6%                                                                       | (-0.6%        | 30.0%)        | 9.1%                                                                          | (-13.2%      | 61.3%)         | -2.9%                                                                                 | (-199.0% | 127.9%) |
| BMI                                             | 0.0%                                                                       | (-5.6%        | 5.0%)         | 0.3%                                                                          | (-17.9%      | 25.2%)         | 0.5%                                                                                  | (-155.6% | 150.3%) |
| <b>Clinical used blood Biomarkers</b>           |                                                                            |               |               |                                                                               |              |                |                                                                                       |          |         |
| Total cholesterol                               | -0.1%                                                                      | (-3.0%        | 2.0%)         | 2.8%                                                                          | (-17.4%      | 51.7%)         | 2.4%                                                                                  | (-78.5%  | 155.4%) |
| HDL                                             | 0.0%                                                                       | (-6.9%        | 6.0%)         | -4.3%                                                                         | (-37.1%      | 15.7%)         | -0.6%                                                                                 | (-123.2% | 153.3%) |
| LDL                                             | -0.4%                                                                      | (-4.3%        | 1.6%)         | 0.1%                                                                          | (-36.5%      | 39.8%)         | 0.2%                                                                                  | (-85.9%  | 107.6%) |
| Glucose                                         | -0.2%                                                                      | (-9.6%        | 5.6%)         | -4.8%                                                                         | (-55.3%      | 65.6%)         | 3.3%                                                                                  | (-180.6% | 288.1%) |
| C-reactive protein                              | 2.2%                                                                       | (-5.3%        | 19.4%)        | -14.3%                                                                        | (-189.0%     | 103.1%)        | 1.2%                                                                                  | (-88.4%  | 92.8%)  |

**Supplementary Table 24. Average mediated proportions for DNA methylation and clinical mediators on the relationship between education attainment and all-cause mortality among White participants of NHANES 1999-2002 (n=943). Bold indicates statistical significance (p-value<0.05), and bold with two asterisks indicates significance passed Bonferroni adjustment (p-value<0.0021).**

|                                                 | Model 1. Less than high school (N=193) vs. College degree or higher (N=237) |                                                                                                                                                                                  |               | Model 2. High school graduate/GED (N=285) vs. College degree or higher (N=237) |                                                                                                            | Model 3. Some college or associates degree (N=228) vs. College degree or higher (N=237) |                |                                       |               |
|-------------------------------------------------|-----------------------------------------------------------------------------|----------------------------------------------------------------------------------------------------------------------------------------------------------------------------------|---------------|--------------------------------------------------------------------------------|------------------------------------------------------------------------------------------------------------|-----------------------------------------------------------------------------------------|----------------|---------------------------------------|---------------|
|                                                 | Average mediated proportion                                                 | (95% CI)                                                                                                                                                                         |               | Average mediated proportion                                                    | (95% CI)                                                                                                   | Average mediated proportion                                                             | (95% CI)       |                                       |               |
| <b>Chronological age clocks</b>                 |                                                                             |                                                                                                                                                                                  |               |                                                                                |                                                                                                            |                                                                                         |                |                                       |               |
| Hannum                                          | 1.6%                                                                        | (-0.6%                                                                                                                                                                           | 5.8%)         | 4.2%                                                                           | (-0.2%                                                                                                     | 14.7%)                                                                                  | -0.3%          | (-8.3%                                | 6.4%)         |
| Hovarth                                         | -0.1%                                                                       | (-2.3%                                                                                                                                                                           | 1.7%)         | -1.3%                                                                          | (-8.9%                                                                                                     | 1.6%)                                                                                   | <b>-3.2%</b>   | <b>(-10.6%</b> <td><b>-0.1%)</b></td> | <b>-0.1%)</b> |
| Weidner                                         | -0.2%                                                                       | (-4.3%                                                                                                                                                                           | 1.9%)         | 0.1%                                                                           | (-3.2%                                                                                                     | 3.9%)                                                                                   | -0.4%          | (-5.0%                                | 1.8%)         |
| Lin                                             | 0.0%                                                                        | (-3.0%                                                                                                                                                                           | 2.3%)         | -1.5%                                                                          | (-6.8%                                                                                                     | 1.2%)                                                                                   | 0.0%           | (-5.5%                                | 4.4%)         |
| Vidal-Bralo                                     | -0.2%                                                                       | (-3.6%                                                                                                                                                                           | 2.3%)         | -0.2%                                                                          | (-5.1%                                                                                                     | 2.6%)                                                                                   | -0.2%          | (-4.5%                                | 2.9%)         |
| SkinBlood                                       | 0.5%                                                                        | (-1.6%                                                                                                                                                                           | 4.2%)         | 0.7%                                                                           | (-2.1%                                                                                                     | 5.9%)                                                                                   | 0.0%           | (-4.0%                                | 3.3%)         |
| Zhang                                           | 0.8%                                                                        | (-1.2%                                                                                                                                                                           | 4.7%)         | 0.2%                                                                           | (-1.8%                                                                                                     | 3.5%)                                                                                   | 0.1%           | (-3.7%                                | 4.1%)         |
| <b>Physiological functioning clocks</b>         |                                                                             |                                                                                                                                                                                  |               |                                                                                |                                                                                                            |                                                                                         |                |                                       |               |
| PhenoAge                                        | <b>6.8%</b>                                                                 | <b>(1.3%</b> <td><b>16.1%)</b></td> <td>2.7%</td> <td>(-2.1%</td> <td>12.5%)</td> <td>1.4%</td> <td>(-5.2%</td> <td>9.6%)</td>                                                   | <b>16.1%)</b> | 2.7%                                                                           | (-2.1%                                                                                                     | 12.5%)                                                                                  | 1.4%           | (-5.2%                                | 9.6%)         |
| GrimAge                                         | <b>26.0%**</b>                                                              | <b>(12.9%</b> <td><b>43.8%)</b></td> <td><b>16.3%**</b></td> <td><b>(5.4%</b> <td><b>40.2%)</b></td> <td><b>31.5%**</b></td> <td><b>(16.9%</b> <td><b>56.4%)</b></td> </td></td> | <b>43.8%)</b> | <b>16.3%**</b>                                                                 | <b>(5.4%</b> <td><b>40.2%)</b></td> <td><b>31.5%**</b></td> <td><b>(16.9%</b> <td><b>56.4%)</b></td> </td> | <b>40.2%)</b>                                                                           | <b>31.5%**</b> | <b>(16.9%</b> <td><b>56.4%)</b></td>  | <b>56.4%)</b> |
| GrimAge2                                        | <b>28.7%**</b>                                                              | <b>(13.9%</b> <td><b>47.8%)</b></td> <td><b>18.1%**</b></td> <td><b>(7.0%</b> <td><b>45.9%)</b></td> <td><b>30.5%**</b></td> <td><b>(16.9%</b> <td><b>55.8%)</b></td> </td></td> | <b>47.8%)</b> | <b>18.1%**</b>                                                                 | <b>(7.0%</b> <td><b>45.9%)</b></td> <td><b>30.5%**</b></td> <td><b>(16.9%</b> <td><b>55.8%)</b></td> </td> | <b>45.9%)</b>                                                                           | <b>30.5%**</b> | <b>(16.9%</b> <td><b>55.8%)</b></td>  | <b>55.8%)</b> |
| <b>Pace of aging clock</b>                      |                                                                             |                                                                                                                                                                                  |               |                                                                                |                                                                                                            |                                                                                         |                |                                       |               |
| DunedinPoAm                                     | <b>13.2%**</b>                                                              | <b>(4.7%</b> <td><b>26.2%)</b></td> <td><b>10.0%</b></td> <td><b>(1.2%</b> <td><b>26.2%)</b></td> <td><b>19.8%**</b></td> <td><b>(9.0%</b> <td><b>35.1%)</b></td> </td></td>     | <b>26.2%)</b> | <b>10.0%</b>                                                                   | <b>(1.2%</b> <td><b>26.2%)</b></td> <td><b>19.8%**</b></td> <td><b>(9.0%</b> <td><b>35.1%)</b></td> </td>  | <b>26.2%)</b>                                                                           | <b>19.8%**</b> | <b>(9.0%</b> <td><b>35.1%)</b></td>   | <b>35.1%)</b> |
| <b>Clocks trained on other aging biomarkers</b> |                                                                             |                                                                                                                                                                                  |               |                                                                                |                                                                                                            |                                                                                         |                |                                       |               |
| Yang                                            | -1.7%                                                                       | (-6.8%                                                                                                                                                                           | 2.2%)         | 0.5%                                                                           | (-4.4%                                                                                                     | 6.4%)                                                                                   | 0.4%           | (-1.8%                                | 5.1%)         |
| Telomere                                        | <b>10.7%</b>                                                                | <b>(3.7%</b> <td><b>20.5%)</b></td> <td>5.5%</td> <td><b>(1.1%</b> <td><b>13.7%)</b></td> <td>3.3%</td> <td>(-1.0%</td> <td>9.5%)</td> </td>                                     | <b>20.5%)</b> | 5.5%                                                                           | <b>(1.1%</b> <td><b>13.7%)</b></td> <td>3.3%</td> <td>(-1.0%</td> <td>9.5%)</td>                           | <b>13.7%)</b>                                                                           | 3.3%           | (-1.0%                                | 9.5%)         |
| <b>Behavioral/Lifestyle measures</b>            |                                                                             |                                                                                                                                                                                  |               |                                                                                |                                                                                                            |                                                                                         |                |                                       |               |
| Sedentary behavior                              | <b>11.5%</b>                                                                | <b>(3.0%</b> <td><b>27.1%)</b></td> <td><b>19.0%**</b></td> <td><b>(7.7%</b> <td><b>39.7%)</b></td> <td>3.1%</td> <td>(-4.8%</td> <td>12.7%)</td> </td>                          | <b>27.1%)</b> | <b>19.0%**</b>                                                                 | <b>(7.7%</b> <td><b>39.7%)</b></td> <td>3.1%</td> <td>(-4.8%</td> <td>12.7%)</td>                          | <b>39.7%)</b>                                                                           | 3.1%           | (-4.8%                                | 12.7%)        |
| Healthy eating index                            | -1.2%                                                                       | (-14.7%                                                                                                                                                                          | 20.4%)        | -1.5%                                                                          | (-21.9%                                                                                                    | 11.3%)                                                                                  | 2.2%           | (-7.9%                                | 11.4%)        |
| Smoking pack years                              | <b>15.9%**</b>                                                              | <b>(6.0%</b> <td><b>30.4%)</b></td> <td><b>11.1%**</b></td> <td><b>(3.1%</b> <td><b>29.6%)</b></td> <td><b>16.6%**</b></td> <td><b>(6.9%</b> <td><b>32.7%)</b></td> </td></td>   | <b>30.4%)</b> | <b>11.1%**</b>                                                                 | <b>(3.1%</b> <td><b>29.6%)</b></td> <td><b>16.6%**</b></td> <td><b>(6.9%</b> <td><b>32.7%)</b></td> </td>  | <b>29.6%)</b>                                                                           | <b>16.6%**</b> | <b>(6.9%</b> <td><b>32.7%)</b></td>   | <b>32.7%)</b> |
| Alcohol drinker                                 | 3.0%                                                                        | (-3.5%                                                                                                                                                                           | 12.0%)        | 6.2%                                                                           | (-0.3%                                                                                                     | 19.3%)                                                                                  | 1.9%           | (-4.4%                                | 10.7%)        |
| <b>Anthropometric measures</b>                  |                                                                             |                                                                                                                                                                                  |               |                                                                                |                                                                                                            |                                                                                         |                |                                       |               |
| Waist to thigh ratio                            | <b>7.9%</b>                                                                 | <b>(1.1%</b> <td><b>18.8%)</b></td> <td>3.1%</td> <td>(-4.5%</td> <td>13.8%)</td> <td>4.0%</td> <td>(-1.8%</td> <td>14.2%)</td>                                                  | <b>18.8%)</b> | 3.1%                                                                           | (-4.5%                                                                                                     | 13.8%)                                                                                  | 4.0%           | (-1.8%                                | 14.2%)        |
| BMI                                             | -0.9%                                                                       | (-11.4%                                                                                                                                                                          | 8.6%)         | 2.8%                                                                           | (-3.3%                                                                                                     | 13.4%)                                                                                  | 2.8%           | (-9.2%                                | 18.9%)        |
| <b>Clinical used blood Biomarkers</b>           |                                                                             |                                                                                                                                                                                  |               |                                                                                |                                                                                                            |                                                                                         |                |                                       |               |
| Total cholesterol                               | 0.5%                                                                        | (-2.1%                                                                                                                                                                           | 5.0%)         | -0.8%                                                                          | (-20.2%                                                                                                    | 9.1%)                                                                                   | -2.9%          | (-16.9%                               | 4.8%)         |
| HDL                                             | -0.1%                                                                       | (-9.5%                                                                                                                                                                           | 8.3%)         | 0.4%                                                                           | (-4.6%                                                                                                     | 6.9%)                                                                                   | -0.1%          | (-4.5%                                | 3.1%)         |
| LDL                                             | 0.6%                                                                        | (-2.2%                                                                                                                                                                           | 5.0%)         | -0.4%                                                                          | (-17.8%                                                                                                    | 12.3%)                                                                                  | -4.2%          | (-15.6%                               | 2.0%)         |
| Glucose                                         | 1.4%                                                                        | (-2.7%                                                                                                                                                                           | 8.4%)         | 0.9%                                                                           | (-2.1%                                                                                                     | 7.1%)                                                                                   | -1.8%          | (-10.7%                               | 2.2%)         |
| C-reactive protein                              | 2.7%                                                                        | (-1.0%                                                                                                                                                                           | 7.6%)         | 0.6%                                                                           | (-4.0%                                                                                                     | 5.7%)                                                                                   | 0.8%           | (-3.6%                                | 6.5%)         |

**Supplementary Table 25. Average mediated proportions for DNA methylation and clinical mediators on the relationship between education attainment and all-cause mortality among Hispanic participants of NHANES 1999-2002 (n=860). Bold indicates statistical significance (p-value<0.05), and bold with two asterisks indicates significance passed Bonferroni adjustment (p-value<0.0021).**

|                                                 | Model 1. Less than high school (N=617) vs. College degree or higher (N=48) |          |         | Model 2. High school graduate/GED (N=86) vs. College degree or higher (N=48) |          |         | Model 3. Some college or associates degree (N=109) vs. College degree or higher (N=48) |          |         |
|-------------------------------------------------|----------------------------------------------------------------------------|----------|---------|------------------------------------------------------------------------------|----------|---------|----------------------------------------------------------------------------------------|----------|---------|
|                                                 | Average mediated proportion                                                | (95% CI) |         | Average mediated proportion                                                  | (95% CI) |         | Average mediated proportion                                                            | (95% CI) |         |
| <b>Chronological age clocks</b>                 |                                                                            |          |         |                                                                              |          |         |                                                                                        |          |         |
| Hannum                                          | 0.0%                                                                       | (-19.5%  | 18.0%)  | 0.6%                                                                         | (-16.0%  | 26.9%)  | -0.5%                                                                                  | (-24.6%  | 26.8%)  |
| Hovarth                                         | 0.3%                                                                       | (-54.0%  | 40.7%)  | 12.5%                                                                        | (-69.7%  | 77.1%)  | 9.3%                                                                                   | (-32.4%  | 55.0%)  |
| Weidner                                         | 0.9%                                                                       | (-14.9%  | 18.4%)  | 7.3%                                                                         | (-28.3%  | 52.2%)  | 9.9%                                                                                   | (-50.2%  | 96.4%)  |
| Lin                                             | 1.1%                                                                       | (-42.7%  | 88.1%)  | 4.9%                                                                         | (-23.5%  | 67.8%)  | 2.3%                                                                                   | (-20.4%  | 30.2%)  |
| Vidal-Bralo                                     | 2.0%                                                                       | (-42.0%  | 39.3%)  | 4.5%                                                                         | (-41.0%  | 57.2%)  | 6.1%                                                                                   | (-9.4%   | 53.6%)  |
| SkinBlood                                       | -0.6%                                                                      | (-42.8%  | 55.1%)  | 1.0%                                                                         | (-19.3%  | 14.5%)  | -0.5%                                                                                  | (-31.9%  | 20.1%)  |
| Zhang                                           | 0.3%                                                                       | (-31.1%  | 33.8%)  | 5.6%                                                                         | (-27.5%  | 46.0%)  | 0.2%                                                                                   | (-51.4%  | 49.0%)  |
| <b>Physiological functioning clocks</b>         |                                                                            |          |         |                                                                              |          |         |                                                                                        |          |         |
| PhenoAge                                        | 1.5%                                                                       | (-32.4%  | 34.4%)  | 4.5%                                                                         | (-14.2%  | 30.5%)  | 1.3%                                                                                   | (-19.5%  | 19.1%)  |
| GrimAge                                         | 1.1%                                                                       | (-47.7%  | 56.3%)  | 0.1%                                                                         | (-24.2%  | 29.9%)  | -1.7%                                                                                  | (-130.7% | 138.5%) |
| GrimAge2                                        | 0.9%                                                                       | (-60.5%  | 69.9%)  | 0.1%                                                                         | (-21.7%  | 23.8%)  | -1.7%                                                                                  | (-107.2% | 79.9%)  |
| <b>Pace of aging clock</b>                      |                                                                            |          |         |                                                                              |          |         |                                                                                        |          |         |
| DunedinPoAm                                     | -0.1%                                                                      | (-31.6%  | 29.2%)  | -0.6%                                                                        | (-41.2%  | 35.8%)  | -3.3%                                                                                  | (-176.9% | 125.4%) |
| <b>Clocks trained on other aging biomarkers</b> |                                                                            |          |         |                                                                              |          |         |                                                                                        |          |         |
| Yang                                            | 0.0%                                                                       | (-17.0%  | 19.8%)  | 2.4%                                                                         | (-17.8%  | 44.5%)  | 8.0%                                                                                   | (-24.0%  | 41.1%)  |
| Telomere                                        | 1.9%                                                                       | (-21.2%  | 30.0%)  | 5.2%                                                                         | (-58.3%  | 60.9%)  | 8.8%                                                                                   | (-7.1%   | 41.1%)  |
| <b>Behavioral/Lifestyle measures</b>            |                                                                            |          |         |                                                                              |          |         |                                                                                        |          |         |
| Sedentary behavior                              | -8.2%                                                                      | (-124.0% | 123.7%) | -4.0%                                                                        | (-70.7%  | 21.9%)  | -11.2%                                                                                 | (-99.9%  | 9.9%)   |
| Healthy eating index                            | -4.7%                                                                      | (-65.3%  | 80.7%)  | -7.4%                                                                        | (-80.6%  | 66.8%)  | -2.7%                                                                                  | (-31.1%  | 18.4%)  |
| Smoking pack years                              | 0.1%                                                                       | (-28.7%  | 23.7%)  | -0.8%                                                                        | (-42.9%  | 26.2%)  | 0.2%                                                                                   | (-13.9%  | 38.2%)  |
| Alcohol drinker                                 | 0.0%                                                                       | (-115.8% | 111.1%) | -4.3%                                                                        | (-99.3%  | 77.4%)  | -1.1%                                                                                  | (-33.5%  | 23.5%)  |
| <b>Anthropometric measures</b>                  |                                                                            |          |         |                                                                              |          |         |                                                                                        |          |         |
| Waist to thigh ratio                            | -4.7%                                                                      | (-69.7%  | 59.2%)  | 0.9%                                                                         | (-31.9%  | 44.7%)  | 1.1%                                                                                   | (-14.1%  | 22.4%)  |
| BMI                                             | 1.4%                                                                       | (-43.7%  | 69.7%)  | 0.6%                                                                         | (-58.4%  | 61.1%)  | -1.8%                                                                                  | (-41.4%  | 35.4%)  |
| <b>Clinical used blood Biomarkers</b>           |                                                                            |          |         |                                                                              |          |         |                                                                                        |          |         |
| Total cholesterol                               | -0.4%                                                                      | (-59.7%  | 23.4%)  | 2.3%                                                                         | (-63.3%  | 95.1%)  | 0.4%                                                                                   | (-81.8%  | 90.4%)  |
| HDL                                             | -3.2%                                                                      | (-62.7%  | 45.2%)  | -0.1%                                                                        | (-28.4%  | 14.7%)  | -0.8%                                                                                  | (-36.5%  | 17.3%)  |
| LDL                                             | -0.7%                                                                      | (-42.8%  | 43.6%)  | 3.0%                                                                         | (-49.7%  | 78.0%)  | 0.2%                                                                                   | (-81.1%  | 101.3%) |
| Glucose                                         | -4.3%                                                                      | (-119.3% | 70.3%)  | -1.2%                                                                        | (-120.6% | 114.7%) | -2.4%                                                                                  | (-36.1%  | 27.1%)  |
| C-reactive protein                              | 0.1%                                                                       | (-5.7%   | 8.1%)   | 0.4%                                                                         | (-17.6%  | 15.7%)  | 0.6%                                                                                   | (-3.5%   | 8.3%)   |

**Supplementary Table 26. Average mediated proportions for DNA methylation and clinical mediators on the relationship between household income and all-cause mortality among Black participants of NHANES 1999-2002 (n=516). Bold indicates statistical significance (p-value<0.05), and bold with two asterisks indicates significance passed Bonferroni adjustment (p-value<0.0021).**

|                                                 | Model 1. PIR<1 (N=86)<br>vs. PIR 5+ (N=54) |                     | Model 2. PIR 1-2 (N=155)<br>vs. PIR 5+ (N=54) |                      | Model 3. PIR 2-5 (N=221)<br>vs. PIR 5+ (N=54) |                 |
|-------------------------------------------------|--------------------------------------------|---------------------|-----------------------------------------------|----------------------|-----------------------------------------------|-----------------|
|                                                 | Average mediated<br>proportion             | (95% CI)            | Average mediated<br>proportion                | (95% CI)             | Average mediated<br>proportion                | (95% CI)        |
| <b>Chronological age clocks</b>                 |                                            |                     |                                               |                      |                                               |                 |
| Hannum                                          | 2.9%                                       | (-8.0% 17.8%)       | 8.0%                                          | (-8.5% 28.4%)        | -4.5%                                         | (-89.1% 34.9%)  |
| Hovarth                                         | -2.4%                                      | (-26.7% 7.7%)       | 3.9%                                          | (-7.2% 30.9%)        | -0.6%                                         | (-105.6% 44.2%) |
| Weidner                                         | 0.2%                                       | (-2.9% 7.8%)        | 0.1%                                          | (-5.2% 7.0%)         | 1.0%                                          | (-17.2% 26.6%)  |
| Lin                                             | -0.5%                                      | (-13.8% 6.2%)       | -0.9%                                         | (-17.7% 10.9%)       | -0.5%                                         | (-32.9% 22.3%)  |
| Vidal-Bralo                                     | 0.6%                                       | (-2.9% 8.2%)        | -1.4%                                         | (-15.5% 5.4%)        | -0.5%                                         | (-12.0% 3.2%)   |
| SkinBlood                                       | 0.0%                                       | (-7.4% 6.8%)        | 2.4%                                          | (-3.7% 17.7%)        | 1.6%                                          | (-34.0% 26.7%)  |
| Zhang                                           | 0.7%                                       | (-10.4% 13.7%)      | 4.4%                                          | (-5.2% 26.3%)        | 1.0%                                          | (-27.0% 31.1%)  |
| <b>Physiological functioning clocks</b>         |                                            |                     |                                               |                      |                                               |                 |
| PhenoAge                                        | 1.1%                                       | (-3.9% 13.3%)       | 6.1%                                          | (-6.6% 26.4%)        | -4.5%                                         | (-90.5% 19.4%)  |
| GrimAge                                         | <b>17.6%**</b>                             | <b>(6.7% 43.2%)</b> | <b>23.5%</b>                                  | <b>(8.0% 75.6%)</b>  | 7.2%                                          | (-15.9% 42.8%)  |
| GrimAge2                                        | <b>20.6%**</b>                             | <b>(8.7% 42.1%)</b> | <b>28.8%</b>                                  | <b>(13.4% 78.5%)</b> | 7.1%                                          | (-18.7% 52.8%)  |
| <b>Pace of aging clock</b>                      |                                            |                     |                                               |                      |                                               |                 |
| DunedinPoAm                                     | 0.0%                                       | (-5.4% 4.9%)        | 7.7%                                          | (-5.5% 25.7%)        | -2.1%                                         | (-36.1% 18.6%)  |
| <b>Clocks trained on other aging biomarkers</b> |                                            |                     |                                               |                      |                                               |                 |
| Yang                                            | 0.9%                                       | (-3.7% 8.6%)        | 0.5%                                          | (-4.0% 9.0%)         | 0.2%                                          | (-8.6% 12.5%)   |
| Telomere                                        | <b>10.8%</b>                               | <b>(2.7% 26.0%)</b> | <b>9.2%</b>                                   | <b>(0.9% 29.5%)</b>  | 6.2%                                          | (-20.5% 47.0%)  |
| <b>Behavioral/Lifestyle measures</b>            |                                            |                     |                                               |                      |                                               |                 |
| Sedentary behavior                              | -3.7%                                      | (-24.8% 12.9%)      | 4.1%                                          | (-7.9% 30.7%)        | 10.0%                                         | (-22.4% 69.4%)  |
| Healthy eating index                            | -1.0%                                      | (-9.6% 6.0%)        | -0.7%                                         | (-8.0% 2.1%)         | -7.6%                                         | (-58.1% 14.2%)  |
| Smoking pack years                              | <b>3.1%</b>                                | <b>(0.4% 8.4%)</b>  | 1.4%                                          | (-2.5% 10.6%)        | 3.3%                                          | (-5.3% 23.3%)   |
| Alcohol drinker                                 | -1.8%                                      | (-13.7% 13.4%)      | 0.8%                                          | (-5.7% 12.8%)        | 0.0%                                          | (-24.8% 23.1%)  |
| <b>Anthropometric measures</b>                  |                                            |                     |                                               |                      |                                               |                 |
| Waist to thigh ratio                            | 6.1%                                       | (-0.5% 23.8%)       | <b>12.6%</b>                                  | <b>(1.0% 57.5%)</b>  | 0.1%                                          | (-18.3% 12.2%)  |
| BMI                                             | -1.6%                                      | (-30.3% 7.1%)       | 0.1%                                          | (-13.0% 12.0%)       | -0.1%                                         | (-18.9% 14.1%)  |
| <b>Clinical used blood Biomarkers</b>           |                                            |                     |                                               |                      |                                               |                 |
| Total cholesterol                               | 1.4%                                       | (-12.6% 16.7%)      | -0.7%                                         | (-9.9% 4.4%)         | -0.3%                                         | (-21.0% 13.3%)  |
| HDL                                             | -1.8%                                      | (-19.1% 4.5%)       | -4.3%                                         | (-47.8% 6.7%)        | 0.0%                                          | (-16.0% 14.1%)  |
| LDL                                             | 1.3%                                       | (-8.3% 17.3%)       | -1.8%                                         | (-15.5% 5.0%)        | -1.9%                                         | (-37.1% 6.9%)   |
| Glucose                                         | 1.3%                                       | (-5.8% 17.2%)       | 0.2%                                          | (-5.7% 6.4%)         | -0.4%                                         | (-16.6% 11.7%)  |
| C-reactive protein                              | -1.5%                                      | (-13.2% 9.2%)       | -0.3%                                         | (-10.4% 10.3%)       | -0.2%                                         | (-13.0% 8.9%)   |

**Supplementary Table 27. Average mediated proportions for DNA methylation and clinical mediators on the relationship between household income and all-cause mortality among White participants of NHANES 1999-2002 (n=943). Bold indicates statistical significance (p-value<0.05), and bold with two asterisks indicates significance passed Bonferroni adjustment (p-value<0.0021).**

|                                                 | Model 1. PIR<1 (N=69)<br>vs. PIR 5+ (N=261) |                      | Model 2. PIR 1-2 (N=184)<br>vs. PIR 5+ (N=261) |                      | Model 3. PIR 2-5 (N=429)<br>vs. PIR 5+ (N= 261) |                      |
|-------------------------------------------------|---------------------------------------------|----------------------|------------------------------------------------|----------------------|-------------------------------------------------|----------------------|
|                                                 | Average mediated<br>proportion              | (95% CI)             | Average mediated<br>proportion                 | (95% CI)             | Average mediated<br>proportion                  | (95% CI)             |
| <b>Chronological age clocks</b>                 |                                             |                      |                                                |                      |                                                 |                      |
| Hannum                                          | 4.4%                                        | (-0.9% 15.9%)        | 3.5%                                           | (-0.4% 9.4%)         | 0.2%                                            | (-8.8% 9.8%)         |
| Hovarth                                         | -0.2%                                       | (-5.9% 5.7%)         | 1.0%                                           | (-3.1% 5.5%)         | -0.6%                                           | (-8.5% 4.2%)         |
| Weidner                                         | -0.1%                                       | (-3.9% 2.9%)         | 1.8%                                           | (-0.9% 5.7%)         | 0.0%                                            | (-2.8% 2.3%)         |
| Lin                                             | 0.1%                                        | (-3.9% 4.8%)         | -0.5%                                          | (-2.9% 0.9%)         | -1.4%                                           | (-12.6% 2.6%)        |
| Vidal-Bralo                                     | 0.4%                                        | (-2.5% 7.1%)         | 2.2%                                           | (-0.6% 7.1%)         | 0.2%                                            | (-2.9% 4.4%)         |
| SkinBlood                                       | 0.0%                                        | (-6.0% 4.6%)         | 0.0%                                           | (-2.3% 2.3%)         | -1.7%                                           | (-9.1% 2.8%)         |
| Zhang                                           | 0.0%                                        | (-3.6% 3.9%)         | -0.2%                                          | (-2.1% 1.2%)         | -1.9%                                           | (-10.2% 2.1%)        |
| <b>Physiological functioning clocks</b>         |                                             |                      |                                                |                      |                                                 |                      |
| PhenoAge                                        | <b>8.7%</b>                                 | <b>(0.2% 29.6%)</b>  | <b>9.2%</b>                                    | <b>(1.8% 21.3%)</b>  | 4.8%                                            | (-1.4% 19.4%)        |
| GrimAge                                         | <b>38.5%**</b>                              | <b>(19.1% 64.4%)</b> | <b>28.2%**</b>                                 | <b>(14.4% 55.6%)</b> | <b>25.9%**</b>                                  | <b>(6.2% 79.0%)</b>  |
| GrimAge2                                        | <b>41.7%**</b>                              | <b>(21.8% 71.1%)</b> | <b>31.0%**</b>                                 | <b>(16.8% 60.1%)</b> | <b>28.4%**</b>                                  | <b>(10.5% 95.1%)</b> |
| <b>Pace of aging clock</b>                      |                                             |                      |                                                |                      |                                                 |                      |
| DunedinPoAm                                     | <b>25.2%**</b>                              | <b>(6.4% 53.4%)</b>  | <b>15.2%**</b>                                 | <b>(4.1% 38.8%)</b>  | <b>16.7%</b>                                    | <b>(4.1% 58.6%)</b>  |
| <b>Clocks trained on other aging biomarkers</b> |                                             |                      |                                                |                      |                                                 |                      |
| Yang                                            | 0.6%                                        | (-4.0% 8.5%)         | 0.8%                                           | (-1.5% 5.3%)         | 0.0%                                            | (-4.0% 5.1%)         |
| Telomere                                        | 3.9%                                        | (-4.5% 14.5%)        | <b>8.9%**</b>                                  | <b>(2.9% 20.8%)</b>  | <b>6.1%</b>                                     | <b>(0.8% 20.4%)</b>  |
| <b>Behavioral/Lifestyle measures</b>            |                                             |                      |                                                |                      |                                                 |                      |
| Sedentary behavior                              | <b>29.0%</b>                                | <b>(6.1% 63.3%)</b>  | <b>12.8%</b>                                   | <b>(2.8% 41.8%)</b>  | 12.0%                                           | (-0.8% 56.8%)        |
| Healthy eating index                            | 1.9%                                        | (-21.4% 25.3%)       | 3.9%                                           | (-3.2% 18.3%)        | 1.2%                                            | (-7.8% 20.5%)        |
| Smoking pack years                              | <b>15.4%**</b>                              | <b>(5.3% 30.5%)</b>  | <b>17.1%**</b>                                 | <b>(6.4% 42.4%)</b>  | <b>17.1%**</b>                                  | <b>(6.0% 55.7%)</b>  |
| Alcohol drinker                                 | -8.0%                                       | (-33.1% 8.5%)        | 3.0%                                           | (-14.5% 18.8%)       | 7.3%                                            | (-0.6% 24.8%)        |
| <b>Anthropometric measures</b>                  |                                             |                      |                                                |                      |                                                 |                      |
| Waist to thigh ratio                            | 2.6%                                        | (-15.5% 15.2%)       | 4.7%                                           | (-7.1% 17.5%)        | <b>12.4%</b>                                    | <b>(1.9% 35.2%)</b>  |
| BMI                                             | -1.0%                                       | (-14.9% 13.2%)       | -2.0%                                          | (-19.9% 6.5%)        | 1.1%                                            | (-19.7% 20.3%)       |
| <b>Clinical used blood Biomarkers</b>           |                                             |                      |                                                |                      |                                                 |                      |
| Total cholesterol                               | 0.2%                                        | (-6.4% 8.3%)         | 1.4%                                           | (-1.9% 9.8%)         | 0.0%                                            | (-6.0% 8.7%)         |
| HDL                                             | -5.8%                                       | (-21.7% 6.4%)        | 1.2%                                           | (-8.0% 11.2%)        | 1.4%                                            | (-8.3% 14.2%)        |
| LDL                                             | -2.2%                                       | (-16.3% 6.2%)        | 1.2%                                           | (-2.6% 8.9%)         | -0.6%                                           | (-10.3% 11.2%)       |
| Glucose                                         | 4.7%                                        | (-0.4% 14.3%)        | 0.3%                                           | (-3.6% 6.6%)         | 4.8%                                            | (-1.9% 20.1%)        |
| C-reactive protein                              | <b>9.0%</b>                                 | <b>(1.1% 21.7%)</b>  | <b>6.6%</b>                                    | <b>(1.1% 15.6%)</b>  | 2.3%                                            | (-0.9% 13.3%)        |

**Supplementary Table 28. Average mediated proportions for DNA methylation and clinical mediators on the relationship between household income and all-cause mortality among Hispanic participants of NHANES 1999-2002 (n=860). Bold indicates statistical significance (p-value<0.05), and bold with two asterisks indicates significance passed Bonferroni adjustment (p-value<0.0021).**

|                                                 | <b>Model 1. PIR&lt;1 (N=198)<br/>vs. PIR 5+ (N=66)</b> |                 | <b>Model 2. PIR 1-2 (N=355)<br/>vs. PIR 5+ (N=66)</b> |                 | <b>Model 3. PIR 2-5 (N=241)<br/>vs. PIR 5+ (N=66)</b> |                 |
|-------------------------------------------------|--------------------------------------------------------|-----------------|-------------------------------------------------------|-----------------|-------------------------------------------------------|-----------------|
|                                                 | <b>Average mediated<br/>proportion</b>                 | <b>(95% CI)</b> | <b>Average mediated<br/>proportion</b>                | <b>(95% CI)</b> | <b>Average mediated<br/>proportion</b>                | <b>(95% CI)</b> |
| <b>Chronological age clocks</b>                 |                                                        |                 |                                                       |                 |                                                       |                 |
| Hannum                                          | 0.3%                                                   | (-104.5%130.4%) | 0.0%                                                  | (-38.9% 27.4%)  | 0.5%                                                  | (-51.5% 54.5%)  |
| Hovarth                                         | 2.9%                                                   | (-76.2% 107.5%) | 0.1%                                                  | (-60.9% 87.3%)  | 0.4%                                                  | (-28.7% 51.4%)  |
| Weidner                                         | 2.9%                                                   | (-36.8% 54.4%)  | 0.3%                                                  | (-128.7% 66.8%) | 3.5%                                                  | (-66.8% 90.7%)  |
| Lin                                             | 2.2%                                                   | (-303.7%231.7%) | -1.0%                                                 | (-55.3% 50.8%)  | 1.0%                                                  | (-46.4% 41.8%)  |
| Vidal-Bralo                                     | 10.0%                                                  | (-152.6%170.5%) | -9.1%                                                 | (-236.8%184.4%) | 4.1%                                                  | (-151.3%124.7%) |
| SkinBlood                                       | 0.2%                                                   | (-55.8% 52.4%)  | -0.1%                                                 | (-28.7% 19.8%)  | 0.8%                                                  | (-108.2% 56.8%) |
| Zhang                                           | -0.3%                                                  | (-133.3%127.1%) | 0.4%                                                  | (-34.2% 31.3%)  | 0.5%                                                  | (-40.8% 54.3%)  |
| <b>Physiological functioning clocks</b>         |                                                        |                 |                                                       |                 |                                                       |                 |
| PhenoAge                                        | 1.0%                                                   | (-42.5% 66.1%)  | 3.8%                                                  | (-105.2% 86.9%) | 0.3%                                                  | (-60.3% 64.5%)  |
| GrimAge                                         | 2.5%                                                   | (-35.5% 53.1%)  | 2.2%                                                  | (-78.1% 87.2%)  | 0.2%                                                  | (-65.1% 66.0%)  |
| GrimAge2                                        | 1.0%                                                   | (-44.5% 54.9%)  | 4.6%                                                  | (-163.5%163.6%) | -0.1%                                                 | (-73.7% 55.7%)  |
| <b>Pace of aging clock</b>                      |                                                        |                 |                                                       |                 |                                                       |                 |
| DunedinPoAm                                     | -3.7%                                                  | (-184.1%130.8%) | 0.4%                                                  | (-70.0% 77.1%)  | 0.1%                                                  | (-55.4% 68.9%)  |
| <b>Clocks trained on other aging biomarkers</b> |                                                        |                 |                                                       |                 |                                                       |                 |
| Yang                                            | 0.0%                                                   | (-86.4% 55.6%)  | 2.9%                                                  | (-48.0% 51.3%)  | 0.7%                                                  | (-48.2% 65.4%)  |
| Telomere                                        | 2.4%                                                   | (-99.4% 96.9%)  | 1.2%                                                  | (-112.0% 67.8%) | -0.1%                                                 | (-53.0% 49.8%)  |
| <b>Behavioral/Lifestyle measures</b>            |                                                        |                 |                                                       |                 |                                                       |                 |
| Sedentary behavior                              | 0.7%                                                   | (-408.7%392.8%) | 14.6%                                                 | (-242.4%240.5%) | -1.5%                                                 | (-223.0%226.0%) |
| Healthy eating index                            | 10.7%                                                  | (-524.5%707.7%) | -3.1%                                                 | (-95.9% 66.3%)  | -2.9%                                                 | (-87.6% 75.1%)  |
| Smoking pack years                              | 6.0%                                                   | (-195.8%186.7%) | 0.3%                                                  | (-26.6% 34.0%)  | 0.0%                                                  | (-30.2% 39.9%)  |
| Alcohol drinker                                 | -2.3%                                                  | (-283.6%221.7%) | 0.0%                                                  | (-157.1%143.2%) | 1.8%                                                  | (-46.7% 46.9%)  |
| <b>Anthropometric measures</b>                  |                                                        |                 |                                                       |                 |                                                       |                 |
| Waist to thigh ratio                            | 4.7%                                                   | (-145.0%201.2%) | 10.5%                                                 | (-147.4%319.6%) | -1.0%                                                 | (-63.7% 84.8%)  |
| BMI                                             | 1.7%                                                   | (-86.4% 74.3%)  | 6.3%                                                  | (-121.9%110.8%) | -1.0%                                                 | (-150.3% 87.5%) |
| <b>Clinical used blood Biomarkers</b>           |                                                        |                 |                                                       |                 |                                                       |                 |
| Total cholesterol                               | -0.1%                                                  | (-165.2%133.3%) | 2.7%                                                  | (-52.4% 65.4%)  | 50.8%                                                 | (-578.4%814.2%) |
| HDL                                             | 2.5%                                                   | (-85.6% 76.3%)  | 0.7%                                                  | (-84.6% 59.9%)  | 0.1%                                                  | (-37.4% 65.9%)  |
| LDL                                             | -0.4%                                                  | (-151.6%127.8%) | 2.6%                                                  | (-89.9% 63.6%)  | 47.5%                                                 | (-769.7%824.3%) |
| Glucose                                         | 0.6%                                                   | (-144.3%134.7%) | 0.7%                                                  | (-54.9% 73.8%)  | 0.2%                                                  | (-71.9% 59.9%)  |
| C-reactive protein                              | 0.0%                                                   | (-31.4% 35.8%)  | -1.7%                                                 | (-105.4% 70.2%) | -1.4%                                                 | (-50.6% 46.4%)  |
