# Supplementary material
Source: publisher site journal article supplement (doi:10.18632/aging.206377)
Supplement: Supplementary file 4 [file aging-v18i1-206377-supplementary-material-SD14.xlsx]

## Sheet: Supplementary Table 29
Supplementary Table 29. Average mediated proportions for DNA methylation and clinical mediators on the relationship between occupation status and all-cause mortality among Black participants of NHANES 1999-2002 (n=516). Bold indicates statistical significance (p-value<0.05), and bold with two asterisks indicates significance passed Bonferroni adjustment (p-value<0.0021).
	Model 1. Semi-routine white collar (N=94) vs. White collar (N=82)				Model 2. High skill blue collar (N=84) vs. White collar (N=82)				Model 3. Semi-routine blue collar (N=241) vs. White collar (N=82)				Model 4. Never worked (N=15) vs. White collar (N=82)
	Average mediated proportion	(95% CI)			Average mediated proportion	(95% CI)			Average mediated proportion	(95% CI)			Average mediated proportion	(95% CI)
Chronological age clocks
Hannum	0.0542413	-3.17182	2.08374		0.132392	-0.0826734	0.659486		0.132392	-0.0826734	0.659486		0.103473	-0.0305669	0.492778
Hovarth	0.0013501	-1.35723	2.38379		0.061613	-0.184011	0.4677		0.061613	-0.184011	0.4677		0.0883541	-0.0427667	0.458599
Weidner	-0.0203148	-1.48191	1.93523		-0.000937988	-0.198188	0.130546		-0.000937988	-0.198188	0.130546		-0.0221341	-0.238574	0.0801438
Lin	-0.0436346	-2.39583	Supplementary Table 29		-0.0383867	-0.62488	0.0715297		-0.0383867	-0.62488	0.0715297		-0.00748626	-0.239324	0.0995005
Vidal-Bralo	-0.0504951	-1.93955	2.14264		-0.00205156	-0.202357	0.113255		-0.00205156	-0.202357	0.113255		-0.0054686	-0.243244	0.0637572
SkinBlood	0.00235768	-1.26289	1.502		-0.00698895	-0.388511	0.198962		-0.00698895	-0.388511	0.198962		0.0740484	-0.0261425	0.423941
Zhang	-0.000915228	-3.2477	2.72739		0.021873	-0.256883	0.362347		0.021873	-0.256883	0.362347		0.13503	-0.0324828	0.620231
Physiological functioning clocks
PhenoAge	-0.0540499	-2.38552	2.07382		0.0282535	-0.140949	0.306072		0.0282535	-0.140949	0.306072		0.111742	-0.0318386	0.367957
GrimAge	0.216355	-2.04391	2.44071		0.141601	-0.124692	0.899016		0.141601	-0.124692	0.899016		0.169938	-0.00106601	0.436416
GrimAge2	0.276985	-3.5256	3.73658		0.165006	-0.0592041	0.942831		0.165006	-0.0592041	0.942831		0.14828	-0.00979389	0.453783
Pace of aging clock
DunedinPoAm	0.0080105	-0.617085	1.19746		0.0415823	-0.27659	0.459034		0.0415823	-0.27659	0.459034		-0.00831201	-0.173494	0.076068
Clocks trained on other aging biomarkers
Yang	0.00110476	-1.55966	0.885196		-0.010003	-0.327573	0.190902		-0.010003	-0.327573	0.190902		0.045593	-0.067556	0.311465
Telomere	0.211338	-2.28613	3.2847		0.0808805	-0.11968	0.428684		0.0808805	-0.11968	0.428684		0.133805	-0.123297	0.397212
Behavioral/Lifestyle measures
Sedentary behavior	0.0547358	-1.39636	1.52655		0.223937	-0.125915	1.33175		0.223937	-0.125915	1.33175		-0.00054599	-0.338697	0.180804
Healthy eating index	0.0104318	-0.856286	0.886455		0.0276336	-0.16204	0.399921		0.0276336	-0.16204	0.399921		0.0710102	-0.0659014	0.589975
Smoking pack years	0.0603295	-2.32192	1.3754		0.0425582	-0.137778	0.45718		0.0425582	-0.137778	0.45718		0.182326	-0.109686	0.652371
Alcohol drinker	-0.129713	-2.53337	1.93924		-0.00260848	-0.400874	0.176607		-0.00260848	-0.400874	0.176607		-0.0366532	-0.411897	0.0681286
Anthropometric measures
Waist to thigh ratio	-0.102149	-2.08618	3.12851		0.0306411	-0.186046	0.316691		0.0306411	-0.186046	0.316691		-0.00123669	-0.0966694	0.0736503
BMI	0.0971388	-1.73367	1.47851		-0.0128148	-0.74152	0.360406		-0.0128148	-0.74152	0.360406		0.00885752	-0.154508	0.225473
Clinical used blood Biomarkers
Total cholesterol	0.00632564	-0.832706	1.0523		0.0144958	-0.193838	0.469543		0.0144958	-0.193838	0.469543		0.00863013	-0.0766009	0.120022
HDL	-0.0159646	-2.08132	2.0569		-0.00629367	-0.331366	0.159002		-0.00629367	-0.331366	0.159002		0.0145317	-0.130153	0.160523
LDL	0.00771282	-0.881035	1.37491		0.00258184	-0.28591	0.378285		0.00258184	-0.28591	0.378285		-0.00132745	-0.128524	0.0772052
Glucose	0.278379	-3.34473	4.0805		0.0139962	-0.135019	0.296222		0.0139962	-0.135019	0.296222		-0.000660574	-0.0782889	0.0686083
C-reactive protein	-0.00597382	-2.362	1.82286		-0.00125305	-0.266916	0.211514		-0.00125305	-0.266916	0.211514		0.0395623	-0.373048	0.564288
