# Supplementary material
Source: publisher site journal article supplement (doi:10.18632/aging.206377)
Supplement: Supplementary file 5 [file aging-v18i1-206377-supplementary-material-SD15.xlsx]

## Sheet: Supplementary Table 30
Supplementary Table 30. Average mediated proportions for DNA methylation and clinical mediators on the relationship between occupation status and all-cause mortality among White participants of NHANES 1999-2002 (n=943). Bold indicates statistical significance (p-value<0.05), and bold with two asterisks indicates significance passed Bonferroni adjustment (p-value<0.0021).
	Model 1. Semi-routine white collar (N=227) vs. White collar (N=326)				Model 2. High skill blue collar (N=130) vs. White collar (N=326)				Model 3. Semi-routine blue collar (N=238) vs. White collar (N=326)				Model 4. Never worked (N=22) vs. White collar (N=326)
	Average mediated proportion	(95% CI)			Average mediated proportion	(95% CI)			Average mediated proportion	(95% CI)			Average mediated proportion	(95% CI)
Chronological age clocks
Hannum	0.0201227	-0.591579	0.590648		0.101501	0.0220376	0.297831		0.03456	-0.0067225	0.15224		0.132732	-3.4675	3.32985
Hovarth	0.0118451	-0.302029	0.38086		-0.00501484	-0.0468319	0.0276006		-0.00271219	-0.0567102	0.0273233		0.0183173	-1.3683	1.08406
Weidner	-0.000104171	-0.182848	0.135781		-2.85006e-05	-0.0353865	0.0378424		0.00512141	-0.0220741	0.0692739		3.43065e-05	-0.304417	0.552291
Lin	0.00171444	-0.354974	0.242422		-2.91288e-05	-0.0398174	0.032915		0.00793694	-0.0281079	0.0627689		0.00199365	-0.323882	0.564594
Vidal-Bralo	-0.00213345	-0.299161	0.213459		0.00138884	-0.0390838	0.0426989		-0.00438766	-0.0825169	0.0475252		0.001309	-0.909182	0.708462
SkinBlood	0.000588161	-0.424472	0.446778		0.0310391	-0.0159351	0.147311		0.00896125	-0.0157522	0.0757093		0.0045132	-0.597925	0.684392
Zhang	0.01356	-0.534208	0.430012		0.0203283	-0.00907382	0.109781		0.0021877	-0.0333153	0.0473841		0.0191134	-1.27335	1.09712
Physiological functioning clocks
PhenoAge	0.0446934	-0.832637	1.33073		0.0680307	-0.0013628	0.326366		0.0581775	-0.0233172	0.28748		0.0744597	-2.28867	2.8517
GrimAge	0.464467	-4.30617	5.1777		0.499064	0.244815	1.29238		0.382797	0.138814	0.879231		0.319994	-8.03616	8.79514
GrimAge2	0.440551	-2.9962	5.5001		0.514544	0.246307	1.3327		0.406908	0.187953	0.885173		0.372392	-7.73899	9.18428
Pace of aging clock
DunedinPoAm	0.352341	-2.64244	2.7606		0.239775	0.0817229	0.671021		0.240619	0.100699	0.561123		0.26525	-4.92594	8.51274
Clocks trained on other aging biomarkers
Yang	0.0010803	-0.179285	0.28372		0.00302693	-0.0658208	0.0699432		-0.000662843	-0.0537342	0.0276842		-0.00103901	-0.316074	0.302926
Telomere	0.0103351	-0.631016	0.565881		0.101128	0.0255702	0.273863		0.0721719	-0.0128791	0.216739		0.0879714	-1.81307	2.28905
Behavioral/Lifestyle measures
Sedentary behavior	0.0570566	-0.8461	0.926722		0.230792	0.0472256	0.830528		0.281963	0.127206	1.07181		0.0867641	-3.8793	3.91748
Healthy eating index	0.0159183	-0.276699	0.308551		0.16858	-0.00867524	0.680197		0.215035	-0.0578677	1.0718		0.0326744	-1.22723	1.91694
Smoking pack years	0.224939	-3.21265	3.06381		0.319486	0.127553	0.853376		0.264732	0.10366	1.00059		0.213608	-5.19762	4.02168
Alcohol drinker	0.0408462	-0.573831	0.790387		0.039501	-0.0921871	0.239697		0.107531	0.0292178	0.467956		0.0487853	-1.83259	1.83519
Anthropometric measures
Waist to thigh ratio	0.0509715	-0.416478	0.86355		0.108078	0.00768935	0.470746		0.241424	0.0838717	0.874142		0.215042	-5.25275	5.4318
BMI	0.00373016	-0.271023	0.432788		0.0219348	-0.0468065	0.247642		0.0238395	-0.147443	0.281496		-0.0108602	-3.03436	2.69131
Clinical used blood Biomarkers
Total cholesterol	0.0375135	-0.208794	0.430101		-0.0001243	-0.0474018	0.045112		-0.0336153	-0.156719	0.0363121		0.027395	-1.9164	2.56432
HDL	0.000606101	-0.169395	0.217326		0.00214295	-0.0414827	0.0589889		0.0760239	-0.0264144	0.384192		-0.00274287	-1.69961	1.55217
LDL	0.0244921	-0.271659	0.329066		-0.00208996	-0.062953	0.0357072		-0.0443341	-0.23279	0.056082		-0.00503537	-2.25579	1.51027
Glucose	-0.0112237	-0.352932	0.363975		0.00612438	-0.0389658	0.113655		0.0270754	-0.0191381	0.162303		0.0200023	-1.38968	1.48865
C-reactive protein	0.0413001	-1.07188	0.873627		0.0763897	-0.0169618	0.303452		0.0357405	-0.0188256	0.187967		0.00361353	-1.45583	1.77895
