# Supplementary material
Source: publisher site journal article supplement (doi:10.18632/aging.206377)
Supplement: Supplementary file 5 [file aging-v18i1-206377-supplementary-material-SD17.pdf]

**Supplementary Table 32. Average mediated proportions for ten components of GrimAge2 on the relationship between race and ethnicity and all-cause mortality, NHANES 1999-2002 (n=2,402). Bold indicates statistical significance (p-value<0.05), and bold with two asterisks indicates significance passed Bonferroni adjustment (p-value<0.0021).**

|                            | Model 1. Black (N= 516)<br>vs. White (N= 943) |                        | Model 2. Hispanic (N=860)<br>vs. White (N= 943) |                       | Model 3. Other races (N=83)<br>vs. White (N= 943) |                   |
|----------------------------|-----------------------------------------------|------------------------|-------------------------------------------------|-----------------------|---------------------------------------------------|-------------------|
|                            | Average mediated proportion                   | (95% CI)               | Average mediated proportion                     | (95% CI)              | Average mediated proportion                       | (95% CI)          |
| <b>GrimAge2 components</b> |                                               |                        |                                                 |                       |                                                   |                   |
| GDF15Mort                  | 4.1%                                          | (0.1% 11.7%)           | 16.3%                                           | (4.2% 56.1%)          | 8.1%                                              | (-126.9% 131.2%)  |
| B2MMort                    | <b>25.3%**</b>                                | <b>(11.5% 66.4%)</b>   | <b>22.2%**</b>                                  | <b>(9.0% 70.8%)</b>   | 32.2%                                             | (-479.1% 568.0%)  |
| CystatinCMort              | <b>12.1%**</b>                                | <b>(5.1% 27.8%)</b>    | <b>27.3%</b>                                    | <b>(10.7% 84.0%)</b>  | 54.4%                                             | (-625.8% 1107.9%) |
| TIMP1Mort                  | 8.6%                                          | (-1.1% 27.2%)          | <b>13.2%</b>                                    | <b>(0.9% 43.6%)</b>   | 6.9%                                              | (-124.1% 186.7%)  |
| ADMMort                    | <b>-21.4%**</b>                               | <b>(-52.2% - 9.1%)</b> | -13.8%                                          | (-64.6% 0.3%)         | -2.8%                                             | (-72.8% 57.9%)    |
| PAIIMort                   | -1.4%                                         | (-8.9% 3.4%)           | 0.4%                                            | (-10.3% 10.1%)        | -1.6%                                             | (-64.9% 55.8%)    |
| LeptinMort                 | <b>5.6%</b>                                   | <b>(0.6% 15.9%)</b>    | 2.1%                                            | (-3.0% 12.0%)         | 1.0%                                              | (-52.9% 44.4%)    |
| PACKYRSMort                | <b>38.7%**</b>                                | <b>(22.0% 75.4%)</b>   | 0.4%                                            | (-58.0% 25.5%)        | -5.9%                                             | (-182.8% 247.6%)  |
| CRPMort                    | <b>20.5%**</b>                                | <b>(9.1% 45.9%)</b>    | <b>30.8%**</b>                                  | <b>(13.6% 80.6%)</b>  | 11.7%                                             | (-126.0% 137.7%)  |
| logA1CMort                 | <b>27.7%**</b>                                | <b>(14.5% 52.2%)</b>   | <b>29.5%**</b>                                  | <b>(12.4% 121.6%)</b> | 21.9%                                             | (-184.9% 234.8%)  |

**Supplementary Table 33. Average mediated proportions for ten components of GrimAge2 on the relationship between education attainment and all-cause mortality, NHANES 1999-2002 (n=2,402). Bold indicates statistical significance (p-value<0.05), and bold with two asterisks indicates significance passed Bonferroni adjustment (p-value<0.0021).**

|                            | Model 1. Less than high school (N=1,096) vs.<br>College degree or higher (N= 370) |                     | Model 2. High school graduate/GED (N=496)<br>vs. College degree or higher (N= 370) |                     | Model 3. Some college or associates degree (N=440)<br>vs. College degree or higher (N= 370) |                      |
|----------------------------|-----------------------------------------------------------------------------------|---------------------|------------------------------------------------------------------------------------|---------------------|---------------------------------------------------------------------------------------------|----------------------|
|                            | Average mediated proportion                                                       | (95% CI)            | Average mediated proportion                                                        | (95% CI)            | Average mediated proportion                                                                 | (95% CI)             |
| <b>GrimAge2 components</b> |                                                                                   |                     |                                                                                    |                     |                                                                                             |                      |
| GDF15Mort                  | <b>7.0%**</b>                                                                     | <b>(2.2% 13.5%)</b> | 3.1%                                                                               | (-1.2% 11.8%)       | <b>10.8%**</b>                                                                              | <b>(4.3% 21.4%)</b>  |
| B2MMort                    | <b>4.0%</b>                                                                       | <b>(1.1% 8.0%)</b>  | <b>5.4%</b>                                                                        | <b>(0.6% 13.6%)</b> | 2.6%                                                                                        | (-4.3% 10.6%)        |
| CystatinCMort              | <b>4.1%</b>                                                                       | <b>(0.7% 9.8%)</b>  | 3.3%                                                                               | (-0.9% 12.7%)       | 4.2%                                                                                        | (-2.6% 12.8%)        |
| TIMP1Mort                  | <b>8.7%**</b>                                                                     | <b>(3.4% 16.5%)</b> | 3.4%                                                                               | (-0.2% 13.4%)       | <b>9.5%</b>                                                                                 | <b>(2.4% 19.7%)</b>  |
| ADMMort                    | 1.4%                                                                              | (-2.8% 6.2%)        | -0.9%                                                                              | (-9.1% 4.9%)        | 1.8%                                                                                        | (-4.8% 10.0%)        |
| PAIIMort                   | <b>3.0%</b>                                                                       | <b>(0.0% 8.5%)</b>  | 2.1%                                                                               | (-0.6% 8.4%)        | <b>8.6%</b>                                                                                 | <b>(1.0% 26.3%)</b>  |
| LeptinMort                 | 1.3%                                                                              | (-2.8% 7.8%)        | 2.5%                                                                               | (-2.7% 11.2%)       | 0.0%                                                                                        | (-3.9% 5.3%)         |
| PACKYRSMort                | <b>17.6%**</b>                                                                    | <b>(8.8% 30.2%)</b> | <b>17.3%**</b>                                                                     | <b>(6.3% 37.1%)</b> | <b>27.0%**</b>                                                                              | <b>(12.5% 55.8%)</b> |
| CRPMort                    | <b>14.4%**</b>                                                                    | <b>(6.2% 27.5%)</b> | <b>8.2%**</b>                                                                      | <b>(2.3% 23.6%)</b> | <b>9.4%**</b>                                                                               | <b>(2.3% 22.6%)</b>  |
| logA1CMort                 | 5.7%                                                                              | (-1.0% 14.9%)       | <b>7.0%</b>                                                                        | <b>(0.7% 21.3%)</b> | <b>7.4%</b>                                                                                 | <b>(0.2% 24.2%)</b>  |

**Supplementary Table 34. Average mediated proportions for ten components of GrimAge2 on the relationship between household income and all-cause mortality, NHANES 1999-2002 (n=2,402). Bold indicates statistical significance (p-value<0.05), and bold with two asterisks indicates significance passed Bonferroni adjustment (p-value<0.0021).**

|                            | Model 1. PIR<1 (N=373)<br>vs. PIR 5+ (N= 399) |                      | Model 2. PIR 1-2 (N=707)<br>vs. PIR 5+ (N= 399) |                     | Model 3. PIR 2-5 (N=923)<br>vs. PIR 5+ (N= 399) |                      |
|----------------------------|-----------------------------------------------|----------------------|-------------------------------------------------|---------------------|-------------------------------------------------|----------------------|
|                            | Average mediated proportion                   | (95% CI)             | Average mediated proportion                     | (95% CI)            | Average mediated proportion                     | (95% CI)             |
| <b>GrimAge2 components</b> |                                               |                      |                                                 |                     |                                                 |                      |
| GDF15Mort                  | 4.5%                                          | (-1.7% 13.2%)        | <b>5.9%**</b>                                   | <b>(2.2% 13.2%)</b> | <b>4.5%</b>                                     | <b>(0.5% 18.4%)</b>  |
| B2MMort                    | <b>9.0%**</b>                                 | <b>(2.8% 18.9%)</b>  | <b>8.2%**</b>                                   | <b>(3.5% 15.0%)</b> | <b>10.0%**</b>                                  | <b>(3.8% 24.9%)</b>  |
| CystatinCMort              | <b>6.9%</b>                                   | <b>(1.3% 15.9%)</b>  | <b>9.3%**</b>                                   | <b>(4.0% 19.8%)</b> | <b>5.7%</b>                                     | <b>(1.1% 17.7%)</b>  |
| TIMP1Mort                  | <b>9.4%</b>                                   | <b>(2.4% 19.9%)</b>  | <b>10.2%**</b>                                  | <b>(4.2% 20.2%)</b> | <b>6.5%</b>                                     | <b>(0.0% 21.0%)</b>  |
| ADMMort                    | 2.1%                                          | (-3.4% 8.6%)         | <b>4.4%</b>                                     | <b>(0.6% 11.3%)</b> | <b>3.5%</b>                                     | <b>(-6.5% 14.5%)</b> |
| PAIIMort                   | 1.9%                                          | (-3.2% 8.8%)         | 1.9%                                            | (-0.4% 6.1%)        | 3.8%                                            | (-0.5% 14.5%)        |
| LeptinMort                 | 0.6%                                          | (-1.5% 4.7%)         | 1.5%                                            | (-1.3% 7.0%)        | -0.4%                                           | (-4.9% 2.7%)         |
| PACKYRSMort                | <b>24.0%**</b>                                | <b>(12.9% 40.2%)</b> | <b>17.4%**</b>                                  | <b>(8.7% 32.6%)</b> | <b>14.6%</b>                                    | <b>(3.8% 38.5%)</b>  |
| CRPMort                    | <b>12.9%</b>                                  | <b>(1.8% 27.8%)</b>  | <b>16.9%**</b>                                  | <b>(7.3% 32.4%)</b> | <b>10.2%</b>                                    | <b>(1.3% 29.4%)</b>  |
| logA1CMort                 | <b>8.7%</b>                                   | <b>(0.7% 19.0%)</b>  | <b>5.6%</b>                                     | <b>(1.1% 13.6%)</b> | <b>8.4%</b>                                     | <b>(1.9% 23.7%)</b>  |
