# Supplementary material
Source: publisher site journal article supplement (doi:10.18632/aging.206377)
Supplement: Supplementary file 6 [file aging-v18i1-206377-supplementary-material-SD16.xlsx]

## Sheet: Supplementary Table 31
Supplementary Table 31. Average mediated proportions for DNA methylation and clinical mediators on the relationship between occupation status and all-cause mortality among Hispanic participants of NHANES 1999-2002 (n=860). Bold indicates statistical significance (p-value<0.05), and bold with two asterisks indicates significance passed Bonferroni adjustment (p-value<0.0021).
	Model 1. Semi-routine white collar (N=80) vs. White collar (N=102)				Model 2. High skill blue collar (N=158) vs. White collar (N=102)				Model 3. Semi-routine blue collar (N=497) vs. White collar (N=102)				Model 4. Never worked (N=23) vs. White collar (N=102)
	Average mediated proportion	(95% CI)			Average mediated proportion	(95% CI)			Average mediated proportion	(95% CI)			Average mediated proportion	(95% CI)
Chronological age clocks
Hannum	-0.0110736	-0.0796497	0.0132791		3.96904e-05	-0.364376	0.386603		-6.8042e-05	-0.169324	0.205092		-0.000377059	-0.466287	0.572589
Hovarth	0.0456313	-0.0777938	0.247868		0.00773153	-1.02006	0.928184		0.0152354	-0.250795	0.351949		0.0283716	-0.551204	0.526222
Weidner	0.0742563	-0.080299	0.354327		0.0331916	-0.943214	0.890731		-0.00125428	-0.162207	0.171198		0.23581	-1.38993	1.9053
Lin	0.00992282	-0.118198	0.202362		0.0300342	-1.48775	1.3339		0.0251176	-0.499629	0.501256		0.000903062	-0.265706	0.323142
Vidal-Bralo	0.0413934	-0.100319	0.309689		0.0760508	-0.945774	1.76292		0.0371861	-0.460084	0.561695		0.113879	-1.34844	1.25783
SkinBlood	-0.0171142	-0.128257	0.044854		0.000770333	-0.358286	0.622094		-0.00255665	-0.392305	0.557595		0.000527446	-0.460146	0.460071
Zhang	0.021735	-0.291326	0.237407		-0.000440323	-0.943064	0.5743		0.0130089	-0.27267	0.339286		0.0226453	-0.594301	0.650455
Physiological functioning clocks
PhenoAge	0.0498754	-0.13359	0.245924		0.0584747	-1.03213	1.33451		0.0505254	-0.367572	0.409143		-0.00864697	-0.631618	0.528036
GrimAge	0.00937399	-0.0844754	0.211438		0.00885457	-0.829963	0.710486		0.0184725	-0.392787	0.523339		-0.00150292	-0.437842	0.400912
GrimAge2	0.00170306	-0.126945	0.133845		0.00268983	-0.620434	0.835603		0.0254511	-0.309803	0.491216		0.000930151	-0.250909	0.292282
Pace of aging clock
DunedinPoAm	-0.000535399	-0.184486	0.151599		0.0015588	-0.988307	1.03375		0.00196981	-0.302165	0.484399		0.000794097	-0.398429	0.391493
Clocks trained on other aging biomarkers
Yang	0.00462042	-0.115244	0.13041		3.28958e-05	-0.62328	0.373068		-0.00188532	-0.368992	0.349462		-0.0112482	-1.13255	0.935896
Telomere	0.0715951	-0.188714	0.52395		0.149217	-1.35153	1.87794		0.0714247	-0.589718	0.881546		0.195192	-2.29236	3.03551
Behavioral/Lifestyle measures
Sedentary behavior	0.00305398	-0.162678	0.165431		-0.0195004	-1.40009	1.29033		-0.102943	-1.69642	1.58951		0.0893781	-1.46778	1.33284
Healthy eating index	0.00330471	-0.125538	0.147736		0.00444017	-0.661951	0.48601		-0.0121976	-0.703088	0.282436		0.0935084	-0.841067	0.959594
Smoking pack years	0.0294433	-0.0869255	0.17746		0.0499085	-2.11935	1.54363		0.0358458	-0.597645	0.655472		0.0315321	-0.350424	0.560244
Alcohol drinker	-0.00047838	-0.121444	0.0957314		-0.0214739	-1.58504	2.37621		-0.0707611	-2.2253	1.43435		-0.171199	-2.00546	1.32298
Anthropometric measures
Waist to thigh ratio	0.0955355	-0.087945	0.406773		0.00795114	-1.42384	1.46215		-0.0416793	-0.560359	0.869563		0.0625119	-0.845994	0.698371
BMI	0.00189884	-0.441495	0.455155		-0.0717726	-1.64647	1.26957		-0.000694495	-0.305542	0.292484		0.00636916	-0.247546	0.327253
Clinical used blood Biomarkers
Total cholesterol	0.0025784	-0.374406	0.295368		-0.00219152	-1.50087	1.33725		-0.0017397	-0.846772	0.464168		0.0581032	-2.47949	3.10091
HDL	-0.0270643	-0.212168	0.0663028		0.00224414	-0.916765	0.86147		-0.0813709	-0.938113	0.687094		-0.0845034	-0.979019	0.966383
LDL	-6.99846e-05	-0.267823	0.217659		-0.00181388	-1.16647	1.07517		-0.00429149	-0.650421	0.755535		0.03134	-0.988107	1.71547
Glucose	-0.00580747	-0.297926	0.103087		-0.0192748	-0.735723	1.17189		-0.0796198	-1.07497	1.29112		0.0338649	-0.831661	0.854553
C-reactive protein	0.00336703	-0.114273	0.0548041		-0.000709556	-0.164677	0.151329		0.00484695	-0.166696	0.156515		-0.00372656	-0.0992497	0.0934846
