# Supplementary material
Source: publisher site journal article supplement (doi:10.18632/aging.206377)
Supplement: Supplementary file 6 [file aging-v18i1-206377-supplementary-material-SD19.pdf]

**Supplementary Table 36. Average mediated proportions for DNA methylation and clinical mediators on the relationship between race and ethnicity and all-cause mortality, among completed cases from NHANES 1999-2002 cohort (n=2,401). Bold indicates statistical significance (p-value<0.05), and bold with two asterisks indicates significance passed Bonferroni adjustment (p-value<0.0021).**

|                                                 | Model 1. Black (N= 516)<br>vs. White (N= 943) |                         | Model 2. Hispanic (N=859)<br>vs. White (N= 943) |                        | Model 3. Other races (N=83)<br>vs. White (N= 943) |                 |
|-------------------------------------------------|-----------------------------------------------|-------------------------|-------------------------------------------------|------------------------|---------------------------------------------------|-----------------|
|                                                 | Average mediated<br>proportion                | (95% CI)                | Average mediated<br>proportion                  | (95% CI)               | Average mediated<br>proportion                    | (95% CI)        |
| <b>Chronological age clocks</b>                 |                                               |                         |                                                 |                        |                                                   |                 |
| Hannum                                          | <b>-19.1%**</b>                               | <b>(-37.8% - 10.5%)</b> | 5.8%                                            | (-4.4% 20.7%)          | 4.5%                                              | (-100.1% 99.9%) |
| Hovarth                                         | <b>-5.2%**</b>                                | <b>(-14.6% - 0.7%)</b>  | -4.9%                                           | (-23.4% 1.3%)          | -1.3%                                             | (-93.6% 56.7%)  |
| Weidner                                         | <b>-2.5%**</b>                                | <b>(-8.2% - 0.3%)</b>   | -3.9%                                           | (-17.5% 0.6%)          | -4.9%                                             | (-98.1% 82.1%)  |
| Lin                                             | -2.9%                                         | (-10.6% 0.3%)           | -3.5%                                           | (-15.7% 1.7%)          | -3.8%                                             | (-62.5% 73.0%)  |
| Vidal-Bralo                                     | <b>-14.6%**</b>                               | <b>(-35.9% - 4.9%)</b>  | <b>-10.2%**</b>                                 | <b>(-40.9% - 2.4%)</b> | -13.5%                                            | (-251.5%159.5%) |
| SkinBlood                                       | <b>-4.9%**</b>                                | <b>(-15.5% - 0.5%)</b>  | 0.1%                                            | (-4.1% 4.4%)           | 1.0%                                              | (-38.1% 47.3%)  |
| Zhang                                           | <b>-9.9%**</b>                                | <b>(-27.0% - 2.8%)</b>  | -1.1%                                           | (-8.2% 2.4%)           | -2.4%                                             | (-59.4% 50.6%)  |
| <b>Physiological functioning clocks</b>         |                                               |                         |                                                 |                        |                                                   |                 |
| PhenoAge                                        | -6.8%                                         | (-22.8% 0.6%)           | 9.4%                                            | (-1.7% 36.3%)          | 5.7%                                              | (-119.3%161.6%) |
| GrimAge                                         | <b>34.4%**</b>                                | <b>(18.7% 66.8%)</b>    | 15.7%                                           | (-16.5% 52.8%)         | 12.0%                                             | (-193.5%234.7%) |
| GrimAge2                                        | <b>46.0%**</b>                                | <b>(26.6% 88.7%)</b>    | <b>39.3%**</b>                                  | <b>(17.6% 120.0%)</b>  | 24.8%                                             | (-206.7%288.7%) |
| <b>Pace of aging clock</b>                      |                                               |                         |                                                 |                        |                                                   |                 |
| DunedinPoAm                                     | <b>23.6%**</b>                                | <b>(10.0% 48.9%)</b>    | <b>29.4%**</b>                                  | <b>(11.2% 83.1%)</b>   | 27.2%                                             | (-211.4%340.7%) |
| <b>Clocks trained on other aging biomarkers</b> |                                               |                         |                                                 |                        |                                                   |                 |
| Yang                                            | 7.4%                                          | (-6.8% 20.9%)           | 3.8%                                            | (-9.4% 19.7%)          | 1.3%                                              | (-98.4% 124.6%) |
| Telomere                                        | <b>-44.4%**</b>                               | <b>(-79.1% - 27.2%)</b> | 2.5%                                            | (-19.4% 19.3%)         | 9.1%                                              | (-177.4%157.2%) |
| <b>Behavioral/Lifestyle measures</b>            |                                               |                         |                                                 |                        |                                                   |                 |
| Sedentary behavior                              | <b>27.8%**</b>                                | <b>(13.4% 54.0%)</b>    | <b>24.1%**</b>                                  | <b>(5.9% 80.7%)</b>    | 18.3%                                             | (-258.0%230.9%) |
| Healthy eating index                            | <b>6.6%**</b>                                 | <b>(0.7% 18.7%)</b>     | 3.3%                                            | (-6.4% 24.3%)          | -0.1%                                             | (-39.6% 42.9%)  |
| Smoking pack years                              | <b>-19.0%**</b>                               | <b>(-45.3% - 8.5%)</b>  | <b>-15.0%**</b>                                 | <b>(-48.0% - 5.1%)</b> | -10.4%                                            | (-155.5%171.8%) |
| Alcohol drinker                                 | <b>13.6%**</b>                                | <b>(5.4% 27.6%)</b>     | <b>10.7%**</b>                                  | <b>(1.5% 49.2%)</b>    | 20.6%                                             | (-334.4%457.4%) |
| <b>Anthropometric measures</b>                  |                                               |                         |                                                 |                        |                                                   |                 |
| Waist to thigh ratio                            | <b>-33.7%**</b>                               | <b>(-86.4% - 17.0%)</b> | <b>16.4%**</b>                                  | <b>(4.3% 59.3%)</b>    | 7.7%                                              | (-240.8%251.2%) |
| BMI                                             | 2.3%                                          | (-7.1% 15.0%)           | 0.3%                                            | (-17.2% 18.0%)         | -0.2%                                             | (-28.1% 30.2%)  |
| <b>Clinical used blood Biomarkers</b>           |                                               |                         |                                                 |                        |                                                   |                 |
| Total cholesterol                               | -0.6%                                         | (-4.5% 1.3%)            | 0.0%                                            | (-4.7% 3.6%)           | -0.3%                                             | (-35.1% 20.0%)  |
| HDL                                             | -0.8%                                         | (-6.6% 2.8%)            | 5.7%                                            | (-5.0% 17.9%)          | 1.4%                                              | (-40.2% 41.0%)  |
| LDL                                             | 0.0%                                          | (-4.6% 5.1%)            | 0.1%                                            | (-6.0% 5.7%)           | 0.1%                                              | (-6.6% 15.0%)   |
| Glucose                                         | <b>7.7%**</b>                                 | <b>(1.9% 17.9%)</b>     | <b>5.6%**</b>                                   | <b>(1.0% 19.6%)</b>    | 7.1%                                              | (-137.9% 92.1%) |
| C-reactive protein                              | <b>9.5%**</b>                                 | <b>(3.0% 23.0%)</b>     | 1.7%                                            | (-2.2% 8.8%)           | -0.7%                                             | (-56.2% 57.8%)  |

**Supplementary Table 37. Average mediated proportions for DNA methylation and clinical mediators on the relationship between education attainment and all-cause mortality, among completed cases from NHANES 1999-2002 cohort (n=2,399). Bold indicates statistical significance (p-value<0.05), and bold with two asterisks indicates significance passed Bonferroni adjustment (p-value<0.0021).**

|                                                 | Model 1. Less than high school (N=1,093) vs. College degree or higher (N= 370) |                                                                                                                                                                                  |               | Model 2. High school graduate/GED (N=496) vs. College degree or higher (N= 370) |                                                                                                            |               | Model 3. Some college or associates degree (N=440) vs. College degree or higher (N= 370) |                                        |                |
|-------------------------------------------------|--------------------------------------------------------------------------------|----------------------------------------------------------------------------------------------------------------------------------------------------------------------------------|---------------|---------------------------------------------------------------------------------|------------------------------------------------------------------------------------------------------------|---------------|------------------------------------------------------------------------------------------|----------------------------------------|----------------|
|                                                 | Average mediated proportion                                                    | (95% CI)                                                                                                                                                                         |               | Average mediated proportion                                                     | (95% CI)                                                                                                   |               | Average mediated proportion                                                              | (95% CI)                               |                |
| <b>Chronological age clocks</b>                 |                                                                                |                                                                                                                                                                                  |               |                                                                                 |                                                                                                            |               |                                                                                          |                                        |                |
| Hannum                                          | 1.7%                                                                           | (-0.1%                                                                                                                                                                           | 4.4%)         | <b>4.4%</b>                                                                     | <b>(0.3%</b> <td><b>13.4%)</b></td> <td>0.5%</td> <td>(-6.9%</td> <td>7.7%)</td>                           | <b>13.4%)</b> | 0.5%                                                                                     | (-6.9%                                 | 7.7%)          |
| Hovarth                                         | -0.1%                                                                          | (-1.9%                                                                                                                                                                           | 1.3%)         | -1.7%                                                                           | (-8.9%                                                                                                     | 1.3%)         | <b>-4.1%</b>                                                                             | <b>(-14.0%</b> <td><b>- 0.2%)</b></td> | <b>- 0.2%)</b> |
| Weidner                                         | -0.2%                                                                          | (-3.2%                                                                                                                                                                           | 1.1%)         | 0.1%                                                                            | (-3.0%                                                                                                     | 3.7%)         | -0.9%                                                                                    | (-7.8%                                 | 1.6%)          |
| Lin                                             | -0.2%                                                                          | (-2.2%                                                                                                                                                                           | 1.2%)         | -1.2%                                                                           | (-5.5%                                                                                                     | 1.0%)         | -0.5%                                                                                    | (-5.4%                                 | 3.1%)          |
| Vidal-Bralo                                     | -0.7%                                                                          | (-3.3%                                                                                                                                                                           | 0.6%)         | -0.3%                                                                           | (-5.0%                                                                                                     | 1.6%)         | -0.7%                                                                                    | (-5.8%                                 | 2.6%)          |
| SkinBlood                                       | 0.3%                                                                           | (-0.9%                                                                                                                                                                           | 2.4%)         | 0.9%                                                                            | (-1.2%                                                                                                     | 5.7%)         | 0.0%                                                                                     | (-3.4%                                 | 2.7%)          |
| Zhang                                           | 0.5%                                                                           | (-0.8%                                                                                                                                                                           | 2.4%)         | 0.2%                                                                            | (-1.7%                                                                                                     | 3.1%)         | -0.1%                                                                                    | (-5.5%                                 | 3.2%)          |
| <b>Physiological functioning clocks</b>         |                                                                                |                                                                                                                                                                                  |               |                                                                                 |                                                                                                            |               |                                                                                          |                                        |                |
| PhenoAge                                        | <b>6.8%**</b>                                                                  | <b>(2.8%</b> <td><b>13.4%)</b></td> <td>2.9%</td> <td>(-1.3%</td> <td>12.2%)</td> <td>3.1%</td> <td>(-5.0%</td> <td>12.4%)</td>                                                  | <b>13.4%)</b> | 2.9%                                                                            | (-1.3%                                                                                                     | 12.2%)        | 3.1%                                                                                     | (-5.0%                                 | 12.4%)         |
| GrimAge                                         | <b>23.5%**</b>                                                                 | <b>(13.2%</b> <td><b>37.0%)</b></td> <td><b>18.7%**</b></td> <td><b>(8.1%</b> <td><b>41.7%)</b></td> <td><b>31.8%**</b></td> <td><b>(17.8%</b> <td><b>57.5%)</b></td> </td></td> | <b>37.0%)</b> | <b>18.7%**</b>                                                                  | <b>(8.1%</b> <td><b>41.7%)</b></td> <td><b>31.8%**</b></td> <td><b>(17.8%</b> <td><b>57.5%)</b></td> </td> | <b>41.7%)</b> | <b>31.8%**</b>                                                                           | <b>(17.8%</b> <td><b>57.5%)</b></td>   | <b>57.5%)</b>  |
| GrimAge2                                        | <b>28.1%**</b>                                                                 | <b>(16.9%</b> <td><b>42.9%)</b></td> <td><b>21.4%**</b></td> <td><b>(9.9%</b> <td><b>48.5%)</b></td> <td><b>32.4%**</b></td> <td><b>(17.2%</b> <td><b>64.2%)</b></td> </td></td> | <b>42.9%)</b> | <b>21.4%**</b>                                                                  | <b>(9.9%</b> <td><b>48.5%)</b></td> <td><b>32.4%**</b></td> <td><b>(17.2%</b> <td><b>64.2%)</b></td> </td> | <b>48.5%)</b> | <b>32.4%**</b>                                                                           | <b>(17.2%</b> <td><b>64.2%)</b></td>   | <b>64.2%)</b>  |
| <b>Pace of aging clock</b>                      |                                                                                |                                                                                                                                                                                  |               |                                                                                 |                                                                                                            |               |                                                                                          |                                        |                |
| DunedinPoAm                                     | <b>13.3%**</b>                                                                 | <b>(6.1%</b> <td><b>22.5%)</b></td> <td><b>11.4%**</b></td> <td><b>(2.8%</b> <td><b>27.6%)</b></td> <td><b>22.0%**</b></td> <td><b>(11.0%</b> <td><b>38.0%)</b></td> </td></td>  | <b>22.5%)</b> | <b>11.4%**</b>                                                                  | <b>(2.8%</b> <td><b>27.6%)</b></td> <td><b>22.0%**</b></td> <td><b>(11.0%</b> <td><b>38.0%)</b></td> </td> | <b>27.6%)</b> | <b>22.0%**</b>                                                                           | <b>(11.0%</b> <td><b>38.0%)</b></td>   | <b>38.0%)</b>  |
| <b>Clocks trained on other aging biomarkers</b> |                                                                                |                                                                                                                                                                                  |               |                                                                                 |                                                                                                            |               |                                                                                          |                                        |                |
| Yang                                            | -0.8%                                                                          | (-4.2%                                                                                                                                                                           | 2.3%)         | 1.2%                                                                            | (-1.5%                                                                                                     | 6.0%)         | 0.3%                                                                                     | (-3.9%                                 | 4.5%)          |
| Telomere                                        | <b>5.3%**</b>                                                                  | <b>(1.9%</b> <td><b>10.1%)</b></td> <td><b>5.7%**</b></td> <td><b>(1.9%</b> <td><b>13.1%)</b></td> <td>3.5%</td> <td>(-0.9%</td> <td>10.9%)</td> </td>                           | <b>10.1%)</b> | <b>5.7%**</b>                                                                   | <b>(1.9%</b> <td><b>13.1%)</b></td> <td>3.5%</td> <td>(-0.9%</td> <td>10.9%)</td>                          | <b>13.1%)</b> | 3.5%                                                                                     | (-0.9%                                 | 10.9%)         |
| <b>Behavioral/Lifestyle measures</b>            |                                                                                |                                                                                                                                                                                  |               |                                                                                 |                                                                                                            |               |                                                                                          |                                        |                |
| Sedentary behavior                              | <b>13.3%**</b>                                                                 | <b>(6.9%</b> <td><b>23.5%)</b></td> <td><b>20.8%**</b></td> <td><b>(9.8%</b> <td><b>42.7%)</b></td> <td>5.9%</td> <td>(-1.4%</td> <td>19.3%)</td> </td>                          | <b>23.5%)</b> | <b>20.8%**</b>                                                                  | <b>(9.8%</b> <td><b>42.7%)</b></td> <td>5.9%</td> <td>(-1.4%</td> <td>19.3%)</td>                          | <b>42.7%)</b> | 5.9%                                                                                     | (-1.4%                                 | 19.3%)         |
| Healthy eating index                            | 2.3%                                                                           | (-7.1%                                                                                                                                                                           | 14.1%)        | 1.2%                                                                            | (-14.7%                                                                                                    | 13.4%)        | 3.8%                                                                                     | (-5.7%                                 | 14.4%)         |
| Smoking pack years                              | <b>10.2%**</b>                                                                 | <b>(4.5%</b> <td><b>18.2%)</b></td> <td><b>11.0%</b></td> <td><b>(2.1%</b> <td><b>31.2%)</b></td> <td><b>16.4%**</b></td> <td><b>(7.4%</b> <td><b>31.0%)</b></td> </td></td>     | <b>18.2%)</b> | <b>11.0%</b>                                                                    | <b>(2.1%</b> <td><b>31.2%)</b></td> <td><b>16.4%**</b></td> <td><b>(7.4%</b> <td><b>31.0%)</b></td> </td>  | <b>31.2%)</b> | <b>16.4%**</b>                                                                           | <b>(7.4%</b> <td><b>31.0%)</b></td>    | <b>31.0%)</b>  |
| Alcohol drinker                                 | 2.6%                                                                           | (-2.5%                                                                                                                                                                           | 8.5%)         | 7.1%                                                                            | <b>(0.7%</b> <td><b>19.6%)</b></td> <td>2.1%</td> <td>(-2.5%</td> <td>10.5%)</td>                          | <b>19.6%)</b> | 2.1%                                                                                     | (-2.5%                                 | 10.5%)         |
| <b>Anthropometric measures</b>                  |                                                                                |                                                                                                                                                                                  |               |                                                                                 |                                                                                                            |               |                                                                                          |                                        |                |
| Waist to thigh ratio                            | <b>5.6%**</b>                                                                  | <b>(1.7%</b> <td><b>12.8%)</b></td> <td>2.8%</td> <td>(-4.7%</td> <td>10.8%)</td> <td>4.6%</td> <td>(-2.8%</td> <td>14.6%)</td>                                                  | <b>12.8%)</b> | 2.8%                                                                            | (-4.7%                                                                                                     | 10.8%)        | 4.6%                                                                                     | (-2.8%                                 | 14.6%)         |
| BMI                                             | 0.4%                                                                           | (-4.6%                                                                                                                                                                           | 6.1%)         | 3.1%                                                                            | (-2.0%                                                                                                     | 15.3%)        | 5.3%                                                                                     | (-7.0%                                 | 23.6%)         |
| <b>Clinical used blood Biomarkers</b>           |                                                                                |                                                                                                                                                                                  |               |                                                                                 |                                                                                                            |               |                                                                                          |                                        |                |
| Total cholesterol                               | 0.0%                                                                           | (-1.5%                                                                                                                                                                           | 1.7%)         | -0.1%                                                                           | (-13.2%                                                                                                    | 10.1%)        | -3.1%                                                                                    | (-14.8%                                | 2.2%)          |
| HDL                                             | -0.1%                                                                          | (-6.6%                                                                                                                                                                           | 5.5%)         | 0.1%                                                                            | (-4.7%                                                                                                     | 5.2%)         | 0.0%                                                                                     | (-4.4%                                 | 3.8%)          |
| LDL                                             | -3.8%                                                                          | (-14.6%                                                                                                                                                                          | 0.5%)         | 10.6%                                                                           | (-27.0%                                                                                                    | 60.9%)        | -4.7%                                                                                    | (-60.0%                                | 19.9%)         |
| Glucose                                         | 2.4%                                                                           | (0.1%                                                                                                                                                                            | 6.5%)         | 1.3%                                                                            | (-2.0%                                                                                                     | 7.0%)         | -1.7%                                                                                    | (-11.6%                                | 4.1%)          |
| C-reactive protein                              | <b>2.0%</b>                                                                    | <b>(0.5%</b> <td><b>4.9%)</b></td> <td>0.7%</td> <td>(-2.3%</td> <td>4.1%)</td> <td>0.8%</td> <td>(-3.2%</td> <td>6.2%)</td>                                                     | <b>4.9%)</b>  | 0.7%                                                                            | (-2.3%                                                                                                     | 4.1%)         | 0.8%                                                                                     | (-3.2%                                 | 6.2%)          |

**Supplementary Table 38. Average mediated proportions for DNA methylation and clinical mediators on the relationship between household income and all-cause mortality, among completed cases from NHANES 1999-2002 cohort (n=2,123). Bold indicates statistical significance (p-value<0.05), and bold with two asterisks indicates significance passed Bonferroni adjustment (p-value<0.0021).**

|                                                 | Model 1. PIR<1 (N=373)<br>vs. PIR 5+ (N= 399) |                      | Model 2. PIR 1-2 (N=591)<br>vs. PIR 5+ (N= 399) |                      | Model 3. PIR 2-5 (N=760)<br>vs. PIR 5+ (N= 399) |                     |
|-------------------------------------------------|-----------------------------------------------|----------------------|-------------------------------------------------|----------------------|-------------------------------------------------|---------------------|
|                                                 | Average mediated<br>proportion                | (95% CI)             | Average mediated<br>proportion                  | (95% CI)             | Average mediated<br>proportion                  | (95% CI)            |
| <b>Chronological age clocks</b>                 |                                               |                      |                                                 |                      |                                                 |                     |
| Hannum                                          | 3.1%                                          | (-0.6% 7.8%)         | 3.8%                                            | (-0.0% 8.2%)         | -0.1%                                           | (-7.3% 6.5%)        |
| Hovarth                                         | -0.1%                                         | (-2.7% 1.4%)         | -0.2%                                           | (-4.1% 3.3%)         | 0.1%                                            | (-3.8% 4.1%)        |
| Weidner                                         | 0.3%                                          | (-1.6% 2.9%)         | 1.2%                                            | (-1.2% 4.6%)         | 0.0%                                            | (-1.8% 2.5%)        |
| Lin                                             | 0.1%                                          | (-1.5% 2.5%)         | -0.7%                                           | (-2.9% 0.9%)         | -0.9%                                           | (-6.9% 2.7%)        |
| Vidal-Bralo                                     | -0.3%                                         | (-3.0% 1.0%)         | 1.2%                                            | (-1.9% 4.9%)         | 0.0%                                            | (-2.3% 2.7%)        |
| SkinBlood                                       | -0.3%                                         | (-3.8% 1.8%)         | 0.0%                                            | (-1.7% 2.1%)         | -0.2%                                           | (-3.4% 4.3%)        |
| Zhang                                           | -0.4%                                         | (-2.8% 1.2%)         | -0.5%                                           | (-2.9% 1.4%)         | -0.8%                                           | (-5.7% 1.6%)        |
| <b>Physiological functioning clocks</b>         |                                               |                      |                                                 |                      |                                                 |                     |
| PhenoAge                                        | <b>5.3%</b>                                   | <b>(0.4% 14.4%)</b>  | <b>10.0%**</b>                                  | <b>(3.3% 20.3%)</b>  | 3.2%                                            | (-1.6% 13.5%)       |
| GrimAge                                         | <b>32.6%**</b>                                | <b>(20.6% 49.6%)</b> | <b>24.2%**</b>                                  | <b>(13.7% 42.9%)</b> | <b>19.7%</b>                                    | <b>(7.2% 52.3%)</b> |
| GrimAge2                                        | <b>37.1%**</b>                                | <b>(22.7% 57.4%)</b> | <b>28.4%**</b>                                  | <b>(17.2% 54.3%)</b> | <b>22.7%**</b>                                  | <b>(9.3% 61.1%)</b> |
| <b>Pace of aging clock</b>                      |                                               |                      |                                                 |                      |                                                 |                     |
| DunedinPoAm                                     | <b>19.4%**</b>                                | <b>(9.2% 35.6%)</b>  | <b>14.1%**</b>                                  | <b>(5.7% 30.3%)</b>  | <b>13.3%</b>                                    | <b>(2.0% 38.0%)</b> |
| <b>Clocks trained on other aging biomarkers</b> |                                               |                      |                                                 |                      |                                                 |                     |
| Yang                                            | 0.2%                                          | (-4.9% 5.1%)         | 0.8%                                            | (-3.2% 5.6%)         | 0.0%                                            | (-3.1% 2.2%)        |
| Telomere                                        | 2.2%                                          | (-1.0% 7.4%)         | <b>6.8%**</b>                                   | <b>(2.7% 13.3%)</b>  | 2.9%                                            | (-0.7% 9.6%)        |
| <b>Behavioral/Lifestyle measures</b>            |                                               |                      |                                                 |                      |                                                 |                     |
| Sedentary behavior                              | <b>20.4%</b>                                  | <b>(4.7% 40.8%)</b>  | <b>10.9%</b>                                    | <b>(1.9% 26.2%)</b>  | <b>13.7%</b>                                    | <b>(1.2% 46.1%)</b> |
| Healthy eating index                            | 4.9%                                          | (-9.6% 20.5%)        | -0.2%                                           | (-7.1% 8.6%)         | 4.8%                                            | (-2.5% 26.2%)       |
| Smoking pack years                              | <b>11.2%**</b>                                | <b>(4.8% 19.2%)</b>  | <b>11.6%</b>                                    | <b>(3.4% 28.6%)</b>  | <b>13.2%**</b>                                  | <b>(4.2% 35.4%)</b> |
| Alcohol drinker                                 | -3.6%                                         | (-19.8% 7.8%)        | 1.8%                                            | (-11.2% 13.2%)       | 6.0%                                            | (-1.6% 20.2%)       |
| <b>Anthropometric measures</b>                  |                                               |                      |                                                 |                      |                                                 |                     |
| Waist to thigh ratio                            | 4.9%                                          | (-2.1% 12.4%)        | 6.1%                                            | (-1.8% 16.3%)        | <b>10.2%</b>                                    | <b>(1.2% 26.3%)</b> |
| BMI                                             | -1.1%                                         | (-11.8% 8.3%)        | 0.6%                                            | (-12.9% 8.2%)        | 1.6%                                            | (-11.9% 14.3%)      |
| <b>Clinical used blood Biomarkers</b>           |                                               |                      |                                                 |                      |                                                 |                     |
| Total cholesterol                               | -0.1%                                         | (-3.8% 3.4%)         | 0.2%                                            | (-1.8% 3.6%)         | -0.6%                                           | (-7.1% 3.4%)        |
| HDL                                             | -3.8%                                         | (-16.0% 5.4%)        | 0.2%                                            | (-7.6% 7.1%)         | 0.7%                                            | (-6.2% 9.4%)        |
| LDL                                             | -1.7%                                         | (-15.7% 4.6%)        | -0.4%                                           | (-37.6% 25.1%)       | 1.4%                                            | (-73.5% 95.2%)      |
| Glucose                                         | <b>6.2%</b>                                   | <b>(1.3% 15.3%)</b>  | 1.7%                                            | (-2.5% 7.6%)         | 3.7%                                            | (-0.5% 14.0%)       |
| C-reactive protein                              | <b>2.0%</b>                                   | <b>(0.4% 5.2%)</b>   | <b>4.8%</b>                                     | <b>(0.6% 10.5%)</b>  | 2.4%                                            | (-0.2% 7.8%)        |
