# Supplementary material
Source: publisher site journal article supplement (doi:10.18632/aging.206377)
Supplement: Supplementary file 7 [file aging-v18i1-206377-supplementary-material-SD2.pdf]

## SUPPLEMENTARY FIGURE

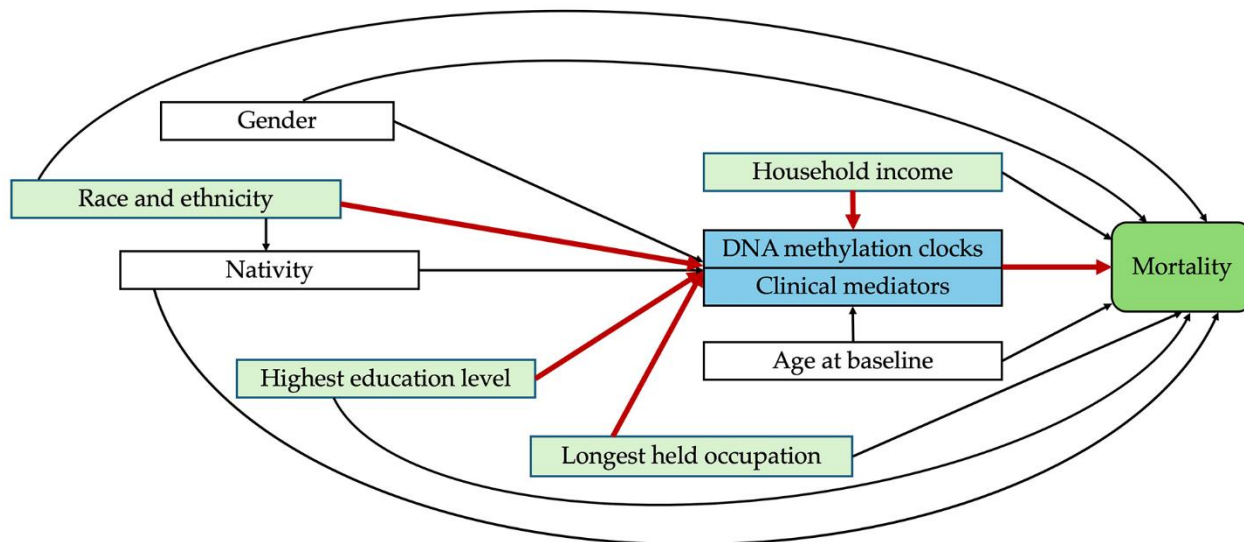

**Supplementary Figure 1. Directed acyclic graph (DAG) illustrating the variables included in the study.** Red arrows indicate the primary pathways examined in the analysis. Light green boxes represent the main exposures, and the dark green box represents the main outcome. Blue boxes denote mediators, while white boxes represent covariates adjusted for in the models.
