# Supplementary material
Source: publisher site journal article supplement (doi:10.18632/aging.206377)
Supplement: Supplementary file 7 [file aging-v18i1-206377-supplementary-material-SD18.xlsx]

## Sheet: Supplementary Table 35
Supplementary Table 35. Average mediated proportions for ten components of GrimAge2 on the relationship between occupation status and all-cause mortality, NHANES 1999-2002 (n=2,402). Bold indicates statistical significance (p-value<0.05), and bold with two asterisks indicates significance passed Bonferroni adjustment (p-value<0.0021).
	Model 1. Semi-routine white collar (N=411) vs. White collar (N= 535)				Model 2. High skill blue collar (N=389) vs. White collar (N= 535)				Model 3. Semi-routine blue collar (N=1,004) vs. White collar (N= 535)				Model 4. Never worked (N=63) vs. White collar (N= 535)
	Average mediated proportion	(95% CI)			Average mediated proportion	(95% CI)			Average mediated proportion	(95% CI)			Average mediated proportion	(95% CI)
GrimAge2 components
GDF15Mort	0.063948	-1.14064	1.34645		0.0922785	0.0170034	0.293397		0.0941968	0.0232185	0.401216		0.127366	-3.90075	4.57027
B2MMort	0.144505	-1.59972	2.14443		0.147437	0.0595692	0.460747		0.0877097	0.0189334	0.334042		0.181002	-2.30363	2.93583
CystatinCMort	0.0629002	-1.17959	1.56207		0.0869123	0.0207116	0.282026		0.0759984	0.00124494	0.274417		0.12345	-1.7761	2.79706
TIMP1Mort	0.0897474	-0.923772	1.647		0.105623	0.0237141	0.339475		0.102726	0.0120727	0.337947		0.213995	-4.03707	4.53718
ADMMort	0.0960808	-1.25401	1.38145		0.0761022	0.00562892	0.358622		0.0545465	-0.0444516	0.206937		0.14217	-1.94457	3.34339
PAI1Mort	0.0337236	-0.60102	0.621177		0.123154	-0.0282825	0.497081		0.0227327	-0.0101803	0.155929		0.0680994	-1.22609	2.00023
LeptinMort	0.0500828	-1.04607	1.06683		0.0269869	-0.0272252	0.172476		0.0362705	-0.0307053	0.199412		0.0642767	-2.05475	1.87811
PACKYRSMort	0.329135	-4.18233	4.48799		0.382032	0.215692	0.831171		0.315171	0.136989	0.804167		0.123178	-3.15263	2.97141
CRPMort	0.151256	-2.23461	2.1654		0.252259	0.066256	0.675262		0.2618	0.116966	0.763484		0.0878797	-3.54843	2.82094
logA1CMort	0.130292	-1.36309	2.48342		0.168738	0.0186098	0.615622		0.110165	0.015848	0.557986		0.0395398	-1.59012	1.42783
