# Supplementary material
Source: publisher site journal article supplement (doi:10.18632/aging.206377)
Supplement: Supplementary file 8 [file aging-v18i1-206377-supplementary-material-SD20.xlsx]

## Sheet: Supplementary Table 39
Supplementary Table 39. Average mediated proportions for DNA methylation and clinical mediators on the relationship between occupation status and all-cause mortality, among completed cases from NHANES 1999-2002 cohort (n=2,262). Bold indicates statistical significance (p-value<0.05), and bold with two asterisks indicates significance passed Bonferroni adjustment (p-value<0.0021).
	Model 1. Semi-routine white collar (N=398) vs. White collar (N= 535)				Model 2. High skill blue collar (N=318) vs. White collar (N= 535)				Model 3. Semi-routine blue collar (N=948) vs. White collar (N= 535)				Model 4. Never worked (N=63) vs. White collar (N= 535)
	Average mediated proportion	(95% CI)			Average mediated proportion	(95% CI)			Average mediated proportion	(95% CI)			Average mediated proportion	(95% CI)
Chronological age clocks
Hannum	0.000780224	-1.03871	0.623126		0.060382	-0.0260783	0.199004		0.0211392	-0.0193968	0.0997213		0.170305	-2.60178	3.15145
Hovarth	0.00422667	-0.577021	0.353505		-0.00207104	-0.0517254	0.0377006		-0.00973438	-0.0747958	0.019701		0.0408776	-1.28853	1.29873
Weidner	-0.000214352	-0.107062	0.100203		-0.000212311	-0.0332966	0.0243876		-0.000871135	-0.0324728	0.0267071		-0.000299607	-0.277033	0.276919
Lin	0.00215653	-0.304908	0.428842		-0.00671175	-0.056401	0.018904		0.00262985	-0.0213021	0.0365043		0.00201757	-0.42671	0.364698
Vidal-Bralo	-0.010442	-0.351193	0.241675		-0.000110639	-0.0373458	0.0321533		-0.0304884	-0.119365	-0.00131933		0.00300157	-0.416172	0.377615
SkinBlood	-0.00527333	-0.818632	0.64833		0.0178884	-0.00934069	0.092356		0.00490897	-0.0150876	0.0421552		0.0160648	-0.701026	0.675685
Zhang	-0.000587005	-0.490903	0.455696		0.00669385	-0.0380644	0.0731351		-0.00614289	-0.0512144	0.0215855		0.0343809	-1.40945	1.16928
Physiological functioning clocks
PhenoAge	0.0570494	-0.659886	1.93265		0.0769315	0.0129538	0.318296		0.0453609	-0.00638832	0.180457		0.125411	-3.4161	3.07138
GrimAge	0.451322	-4.5342	4.35655		0.456984	0.221577	1.17068		0.371692	0.197637	0.948926		0.380639	-6.52804	5.82803
GrimAge2	0.512896	-5.39651	7.07401		0.484229	0.230633	1.40077		0.443185	0.234994	1.05498		0.413026	-7.83106	9.49965
Pace of aging clock
DunedinPoAm	0.394684	-3.2809	3.17853		0.23232	0.0791094	0.698549		0.246378	0.1287	0.596209		0.250369	-4.4708	6.38294
Clocks trained on other aging biomarkers
Yang	-0.000741682	-0.166256	0.176518		0.0050837	-0.0757775	0.105349		0.0015169	-0.0557079	0.0478259		-0.00347967	-0.359578	0.174697
Telomere	-0.0109626	-1.30633	0.825784		0.0478034	-0.0153786	0.142881		0.0230366	-0.0471179	0.106207		0.0805428	-1.27026	1.50112
Behavioral/Lifestyle measures
Sedentary behavior	0.111342	-0.934149	1.40321		0.263215	0.0823267	0.787631		0.339446	0.177617	1.06499		0.138143	-2.40915	2.83775
Healthy eating index	0.0254951	-0.455059	0.606918		0.180628	0.0451717	0.666998		0.207025	0.0209385	1.11423		0.0952786	-0.827221	1.36552
Smoking pack years	0.221167	-1.67908	2.44526		0.308989	0.155551	0.818648		0.212412	0.0730775	0.979306		0.223884	-2.63714	3.44275
Alcohol drinker	0.0353808	-0.393343	0.549368		0.0467743	-0.0870879	0.278098		0.141021	0.0524134	0.463588		0.0982693	-2.2906	1.78387
Anthropometric measures
Waist to thigh ratio	0.0302293	-0.486268	0.93092		0.0699979	0.00487917	0.39225		0.190914	0.0754747	0.611897		0.25606	-5.95373	6.29127
BMI	0.0194105	-0.326893	0.502917		0.0399009	-0.0308402	0.324798		0.0314616	-0.103412	0.369993		-0.0253741	-1.97017	1.98126
Clinical used blood Biomarkers
Total cholesterol	0.0342823	-0.211519	0.379455		0.000155546	-0.0258455	0.0288153		-0.0209634	-0.0975212	0.0138885		0.0129667	-1.54902	1.85777
HDL	0.00124785	-0.155199	0.189659		0.0115237	-0.0133841	0.0709295		0.0614916	-0.0175848	0.313281		-0.0146918	-2.07967	1.29595
LDL	0.0283796	-0.949652	1.10472		-0.0111287	-0.234963	0.211355		-0.0517335	-0.369833	0.0495652		0.0718499	-0.601639	1.20483
Glucose	0.0192751	-0.458357	0.46421		0.00832424	-0.0301115	0.0915294		0.0398268	0.00485629	0.186452		0.0241833	-1.2386	1.63635
C-reactive protein	0.0594978	-0.976154	1.0534		0.0543813	-0.00847831	0.275503		0.0387925	-0.00320267	0.178164		0.00440701	-2.19775	1.30961
