# Supplementary material
Source: publisher site journal article supplement (doi:10.18632/aging.206377)
Supplement: Supplementary file 8 [file aging-v18i1-206377-supplementary-material-SD22.pdf]

**Supplementary Table 41. The wald-test for a square term of DNA methylation and clinical mediators prediction all-cause mortality outcome, NHANES 1999-2002 (n=2,402). Bold indicates statistical significance (p-value<0.05), and bold with two asterisks indicates significance passed Bonferroni adjustment (p-value<0.0021).**

|                                                 | Overall sample<br>(N=2,042) |              |
|-------------------------------------------------|-----------------------------|--------------|
|                                                 | Beta                        | p-value      |
| <b>Chronological age clocks</b>                 |                             |              |
| Hannum                                          | -5.38E-04                   | 0.174        |
| Hovarth                                         | 9.51E-05                    | 0.825        |
| Weidner                                         | 2.75E-04                    | 0.126        |
| Lin                                             | 4.44E-05                    | 0.737        |
| Vidal-Bralo                                     | 3.97E-04                    | 0.223        |
| SkinBlood                                       | 2.79E-04                    | 0.519        |
| Zhang                                           | 2.85E-05                    | 0.992        |
| <b>Physiological functioning clocks</b>         |                             |              |
| PhenoAge                                        | 4.09E-05                    | 0.911        |
| GrimAge                                         | -7.31E-04                   | 0.283        |
| GrimAge2                                        | -7.38E-04                   | 0.305        |
| <b>Pace of aging clock</b>                      |                             |              |
| DunedinPoAm                                     | -3.21E+00                   | 0.260        |
| <b>Clocks trained on other aging biomarkers</b> |                             |              |
| Yang                                            | 5.17E+00                    | 0.931        |
| Telomere                                        | -3.54E-01                   | 0.317        |
| <b>Behavioral/Lifestyle measures</b>            |                             |              |
| Sedentary behavior                              | NA                          | NA           |
| Healthy eating index                            | 7.68E-05                    | 0.629        |
| Smoking pack years                              | -3.75E-05                   | 0.149        |
| Alcohol drinker                                 | NA                          | NA           |
| <b>Anthropometric measures</b>                  |                             |              |
| Waist to thigh ratio                            | 1.57E-01                    | 0.769        |
| BMI                                             | <b>3.35E-03**</b>           | <b>0.000</b> |
| <b>Clinical used blood Biomarkers</b>           |                             |              |
| Total cholesterol                               | <b>6.61E-02**</b>           | <b>0.001</b> |
| HDL                                             | <b>2.24E-04</b>             | <b>0.015</b> |
| LDL                                             | 3.57E-05                    | 0.057        |
| Glucose                                         | 2.86E-06                    | 0.523        |
| C-reactive protein                              | <b>-3.69E-02**</b>          | <b>0.002</b> |
