# Supplementary material
Source: publisher site journal article supplement (doi:10.18632/aging.206377)
Supplement: Supplementary file 9 [file aging-v18i1-206377-supplementary-material-SD4.pdf]

**Supplementary Table 2. Survival analysis for DNA methylation clocks and clinical biomarkers on all-cause mortality, controlled by gender, age, age<sup>2</sup>, and nativity, NHANES 1999-2002 (n=2,402). Bold indicates statistical significance (p-value<0.05).**

|                                                 | All-cause mortality |                    | Cardiovascular-specific mortality |              |              | Cancer-specific mortality |              |              |
|-------------------------------------------------|---------------------|--------------------|-----------------------------------|--------------|--------------|---------------------------|--------------|--------------|
|                                                 | HR                  | (95% CI)           | HR                                | (95% CI)     |              | HR                        | (95% CI)     |              |
| <b>Chronological age clocks</b>                 |                     |                    |                                   |              |              |                           |              |              |
| Hannum                                          | <b>1.04</b>         | <b>(1.02 1.05)</b> | 1.01                              | (0.97        | 1.05)        | <b>1.05</b>               | <b>(1.02</b> | <b>1.07)</b> |
| Hovarth                                         | <b>1.03</b>         | <b>(1.01 1.04)</b> | 1.00                              | (0.98        | 1.03)        | <b>1.04</b>               | <b>(1.02</b> | <b>1.07)</b> |
| Weidner                                         | 1.01                | (1.00 1.02)        | 1.00                              | (0.98        | 1.02)        | 1.01                      | (0.99        | 1.03)        |
| Lin                                             | <b>1.01</b>         | <b>(1.00 1.02)</b> | 1.00                              | (0.98        | 1.02)        | 1.01                      | (0.99        | 1.03)        |
| Vidal-Bralo                                     | <b>1.02</b>         | <b>(1.01 1.04)</b> | 1.00                              | (0.97        | 1.04)        | <b>1.04</b>               | <b>(1.02</b> | <b>1.07)</b> |
| SkinBlood                                       | 1.02                | (1.00 1.04)        | 1.01                              | (0.97        | 1.06)        | 1.01                      | (0.98        | 1.04)        |
| Zhang                                           | <b>1.06</b>         | <b>(1.01 1.11)</b> | 1.03                              | (0.93        | 1.14)        | 1.02                      | (0.95        | 1.09)        |
| <b>Physiological functioning clocks</b>         |                     |                    |                                   |              |              |                           |              |              |
| PhenoAge                                        | <b>1.04</b>         | <b>(1.03 1.05)</b> | 0.99                              | (0.96        | 1.02)        | <b>1.04</b>               | <b>(1.01</b> | <b>1.07)</b> |
| GrimAge                                         | <b>1.11</b>         | <b>(1.09 1.13)</b> | <b>1.10</b>                       | <b>(1.06</b> | <b>1.14)</b> | <b>1.12</b>               | <b>(1.07</b> | <b>1.16)</b> |
| GrimAge2                                        | <b>1.10</b>         | <b>(1.09 1.12)</b> | <b>1.09</b>                       | <b>(1.05</b> | <b>1.13)</b> | <b>1.10</b>               | <b>(1.06</b> | <b>1.14)</b> |
| <b>Pace of aging clock</b>                      |                     |                    |                                   |              |              |                           |              |              |
| DunedinPoAm                                     | <b>43.7</b>         | <b>(16.9 113)</b>  | <b>17.9</b>                       | <b>(2.37</b> | <b>136)</b>  | <b>30.1</b>               | <b>(5.52</b> | <b>164)</b>  |
| <b>Clocks trained on other aging biomarkers</b> |                     |                    |                                   |              |              |                           |              |              |
| Yang                                            | 21.6                | (0.23 2.03E+03)    | 120                               | (0.00        | 2.61E+08)    | 1.44                      | (0.00        | 1.14E+04)    |
| Telomere                                        | 0.39                | (0.29 0.51)        | 0.69                              | (0.28        | 1.67)        | 0.34                      | (0.18        | 0.66)        |
| <b>Behavioral/Lifestyle measures</b>            |                     |                    |                                   |              |              |                           |              |              |
| Sedentary behavior                              | <b>1.71</b>         | <b>(1.45 2.01)</b> | <b>2.43</b>                       | <b>(1.67</b> | <b>3.52)</b> | 1.31                      | (0.85        | 2.03)        |
| Healthy eating index                            | <b>0.99</b>         | <b>(0.98 1.00)</b> | 1.00                              | (0.99        | 1.02)        | <b>0.97</b>               | <b>(0.96</b> | <b>0.99)</b> |
| Smoking pack years                              | <b>1.01</b>         | <b>(1.01 1.01)</b> | <b>1.01</b>                       | <b>(1.00</b> | <b>1.01)</b> | <b>1.01</b>               | <b>(1.01</b> | <b>1.02)</b> |
| Alcohol drinker                                 | <b>0.75</b>         | <b>(0.63 0.88)</b> | 0.60                              | (0.38        | 0.94)        | 1.19                      | (0.78        | 1.83)        |
| <b>Anthropometric measures</b>                  |                     |                    |                                   |              |              |                           |              |              |
| Waist to thigh ratio                            | <b>3.54</b>         | <b>(2.18 5.76)</b> | <b>4.73</b>                       | <b>(1.26</b> | <b>17.8)</b> | 1.79                      | (0.60        | 5.37)        |
| BMI                                             | 1.01                | (0.99 1.03)        | 1.00                              | (0.95        | 1.07)        | 1.00                      | (0.98        | 1.03)        |
| <b>Clinical used blood Biomarkers</b>           |                     |                    |                                   |              |              |                           |              |              |
| Total cholesterol                               | 1.01                | (0.94 1.08)        | 0.97                              | (0.75        | 1.25)        | 1.12                      | (0.93        | 1.34)        |
| HDL                                             | 1.00                | (0.99 1.00)        | 1.00                              | (0.99        | 1.02)        | 1.00                      | (0.99        | 1.01)        |
| LDL                                             | 1.00                | (1.00 1.00)        | 1.00                              | (0.99        | 1.00)        | 1.00                      | (1.00        | 1.01)        |
| Glucose                                         | <b>1.00</b>         | <b>(1.00 1.01)</b> | <b>1.01</b>                       | <b>(1.00</b> | <b>1.01)</b> | 1.00                      | (0.99        | 1.00)        |
| C-reactive protein                              | <b>1.12</b>         | <b>(1.06 1.17)</b> | 1.04                              | (0.93        | 1.17)        | <b>1.09</b>               | <b>(1.01</b> | <b>1.18)</b> |

**Supplementary Table 3. Average mediated proportions for DNA methylation and clinical mediators on the relationship between race and ethnicity and all-cause mortality, NHANES 1999-2002 (n=2,402). Bold indicates statistical significance (p-value<0.05), and bold with two asterisks indicates significance passed Bonferroni adjustment (p-value<0.0021).**

|                                                 | Model 1. Black (N= 516)<br>vs. White (N= 943) |                        | Model 2. Hispanic (N=860)<br>vs. White (N= 943) |                       | Model 3. Other races (N=83)<br>vs. White (N= 943) |                  |
|-------------------------------------------------|-----------------------------------------------|------------------------|-------------------------------------------------|-----------------------|---------------------------------------------------|------------------|
|                                                 | Average mediated proportion                   | (95% CI)               | Average mediated proportion                     | (95% CI)              | Average mediated proportion                       | (95% CI)         |
| <b>Chronological age clocks</b>                 |                                               |                        |                                                 |                       |                                                   |                  |
| Hannum                                          | <b>-19.1%**</b>                               | <b>(-37.8%- 10.5%)</b> | 5.7%                                            | (-4.9% 22.4%)         | 4.5%                                              | (-100.1% 99.9%)  |
| Hovarth                                         | <b>-5.2%</b>                                  | <b>(-14.6%- 0.7%)</b>  | -5.0%                                           | (-28.6% 1.1%)         | -1.3%                                             | (-93.6% 56.7%)   |
| Weidner                                         | <b>-2.5%</b>                                  | <b>(-8.2%- 0.3%)</b>   | -3.7%                                           | (-16.4% 0.5%)         | -4.9%                                             | (-98.1% 82.1%)   |
| Lin                                             | -2.9%                                         | (-10.6% 0.3%)          | -3.4%                                           | (-18.0% 1.6%)         | -3.8%                                             | (-62.5% 73.0%)   |
| Vidal-Bralo                                     | <b>-14.6%**</b>                               | <b>(-35.9%- 4.9%)</b>  | <b>-10.5%</b>                                   | <b>(-43.9%- 2.3%)</b> | -13.5%                                            | (-251.5% 159.5%) |
| SkinBlood                                       | <b>-4.9%</b>                                  | <b>(-15.5%- 0.5%)</b>  | 0.1%                                            | (-5.2% 4.3%)          | 1.0%                                              | (-38.1% 47.3%)   |
| Zhang                                           | <b>-9.9%</b>                                  | <b>(-27.0%- 2.8%)</b>  | -1.2%                                           | (-8.3% 2.3%)          | -2.4%                                             | (-59.4% 50.6%)   |
| <b>Physiological functioning clocks</b>         |                                               |                        |                                                 |                       |                                                   |                  |
| PhenoAge                                        | -6.8%                                         | (-22.8% 0.6%)          | 8.9%                                            | (-1.9% 37.8%)         | 5.7%                                              | (-119.3% 161.6%) |
| GrimAge                                         | <b>34.4%**</b>                                | <b>(18.7% 66.8%)</b>   | 15.3%                                           | (-9.8% 53.8%)         | 12.0%                                             | (-193.5% 234.7%) |
| GrimAge2                                        | <b>46.0%**</b>                                | <b>(26.6% 88.7%)</b>   | <b>39.3%**</b>                                  | <b>(18.2% 100.9%)</b> | 24.8%                                             | (-206.7% 288.7%) |
| <b>Pace of aging clock</b>                      |                                               |                        |                                                 |                       |                                                   |                  |
| DunedinPoAm                                     | <b>23.6%**</b>                                | <b>(10.0% 48.9%)</b>   | <b>28.3%**</b>                                  | <b>(12.6% 70.4%)</b>  | 27.2%                                             | (-211.4% 340.7%) |
| <b>Clocks trained on other aging biomarkers</b> |                                               |                        |                                                 |                       |                                                   |                  |
| Yang                                            | 7.4%                                          | (-6.8% 20.9%)          | 3.6%                                            | (-10.9% 21.1%)        | 1.3%                                              | (-98.4% 124.6%)  |
| Telomere                                        | <b>-44.4%**</b>                               | <b>(-79.1%- 27.2%)</b> | 2.8%                                            | (-21.6% 20.4%)        | 9.1%                                              | (-177.4% 157.2%) |
| <b>Behavioral/Lifestyle measures</b>            |                                               |                        |                                                 |                       |                                                   |                  |
| Sedentary behavior                              | <b>27.8%**</b>                                | <b>(13.4% 54.0%)</b>   | <b>23.4%**</b>                                  | <b>(6.7% 63.6%)</b>   | 18.5%                                             | (-217.7% 298.3%) |
| Healthy eating index                            | <b>6.9%</b>                                   | <b>(0.6% 19.6%)</b>    | 2.9%                                            | (-2.8% 15.3%)         | 0.0%                                              | (-43.2% 62.5%)   |
| Smoking pack years                              | <b>-15.4%**</b>                               | <b>(-34.8%- 6.9%)</b>  | <b>-14.1%</b>                                   | <b>(-37.1%- 4.6%)</b> | -9.1%                                             | (-125.4% 170.8%) |
| Alcohol drinker                                 | <b>11.9%</b>                                  | <b>(4.6% 25.7%)</b>    | <b>8.2%</b>                                     | <b>(0.3% 27.8%)</b>   | 19.6%                                             | (-309.1% 358.3%) |
| <b>Anthropometric measures</b>                  |                                               |                        |                                                 |                       |                                                   |                  |
| Waist to thigh ratio                            | <b>-25.8%</b>                                 | <b>(-54.2%- 12.6%)</b> | <b>15.9%</b>                                    | <b>(4.7% 46.3%)</b>   | 11.1%                                             | (-150.4% 251.1%) |
| BMI                                             | 2.3%                                          | (-6.6% 15.3%)          | 0.3%                                            | (-8.3% 13.5%)         | -0.1%                                             | (-26.1% 27.6%)   |
| <b>Clinical used blood Biomarkers</b>           |                                               |                        |                                                 |                       |                                                   |                  |
| Total cholesterol                               | -0.5%                                         | (-4.7% 1.4%)           | 0.0%                                            | (-4.1% 3.7%)          | -0.2%                                             | (-27.5% 21.8%)   |
| HDL                                             | -0.8%                                         | (-7.7% 3.1%)           | 6.2%                                            | (-3.2% 19.6%)         | 1.6%                                              | (-46.2% 47.4%)   |
| LDL                                             | 0.0%                                          | (-2.6% 1.5%)           | 0.0%                                            | (-3.7% 3.8%)          | 0.0%                                              | (-17.3% 16.4%)   |
| Glucose                                         | <b>8.1%**</b>                                 | <b>(2.2% 19.0%)</b>    | <b>5.5%</b>                                     | <b>(0.7% 18.2%)</b>   | 7.4%                                              | (-82.9% 127.0%)  |
| C-reactive protein                              | <b>9.5%**</b>                                 | <b>(3.2% 24.3%)</b>    | 1.7%                                            | (-2.2% 7.7%)          | -0.8%                                             | (-37.7% 35.0%)   |

**Supplementary Table 4. Average mediated proportions for DNA methylation and clinical mediators on the relationship between education attainment and all-cause mortality, NHANES 1999-2002 (n=2,402). Bold indicates statistical significance (p-value<0.05), and bold with two asterisks indicates significance passed Bonferroni adjustment (p-value<0.0021).**

|                                                 | Model 1. Less than high school<br>(N=1,096) vs. College degree or<br>higher (N= 370) |                      | Model 2. High school<br>graduate/GED (N=496)<br>vs. College degree or higher<br>(N= 370) |                     | Model 3. Some college or associates<br>degree (N=440)<br>vs. College degree or higher<br>(N= 370) |                       |
|-------------------------------------------------|--------------------------------------------------------------------------------------|----------------------|------------------------------------------------------------------------------------------|---------------------|---------------------------------------------------------------------------------------------------|-----------------------|
|                                                 | Average<br>mediated<br>proportion                                                    | (95% CI)             | Average mediated<br>proportion                                                           | (95% CI)            | Average mediated<br>proportion                                                                    | (95% CI)              |
| <b>Chronological age clocks</b>                 |                                                                                      |                      |                                                                                          |                     |                                                                                                   |                       |
| Hannum                                          | 1.6%                                                                                 | (-0.0% 4.5%)         | <b>4.4%</b>                                                                              | <b>(0.3% 13.4%)</b> | 0.5%                                                                                              | (-6.9% 7.7%)          |
| Hovarth                                         | -0.1%                                                                                | (-1.7% 1.3%)         | -1.7%                                                                                    | (-8.9% 1.3%)        | <b>-4.1%</b>                                                                                      | <b>(-14.0%- 0.2%)</b> |
| Weidner                                         | -0.3%                                                                                | (-3.1% 1.3%)         | 0.1%                                                                                     | (-3.0% 3.7%)        | -0.9%                                                                                             | (-7.8% 1.6%)          |
| Lin                                             | -0.2%                                                                                | (-2.1% 1.2%)         | -1.2%                                                                                    | (-5.5% 1.0%)        | -0.5%                                                                                             | (-5.4% 3.1%)          |
| Vidal-Bralo                                     | -0.7%                                                                                | (-3.4% 0.5%)         | -0.3%                                                                                    | (-5.0% 1.6%)        | -0.7%                                                                                             | (-5.8% 2.6%)          |
| SkinBlood                                       | 0.3%                                                                                 | (-1.0% 2.2%)         | 0.9%                                                                                     | (-1.2% 5.7%)        | 0.0%                                                                                              | (-3.4% 2.7%)          |
| Zhang                                           | 0.5%                                                                                 | (-0.7% 2.6%)         | 0.2%                                                                                     | (-1.7% 3.1%)        | -0.1%                                                                                             | (-5.5% 3.2%)          |
| <b>Physiological functioning clocks</b>         |                                                                                      |                      |                                                                                          |                     |                                                                                                   |                       |
| PhenoAge                                        | <b>6.5%**</b>                                                                        | <b>(2.4% 13.7%)</b>  | 2.9%                                                                                     | (-1.3% 12.2%)       | 3.1%                                                                                              | (-5.0% 12.4%)         |
| GrimAge                                         | <b>23.3%**</b>                                                                       | <b>(14.2% 36.6%)</b> | <b>18.7%**</b>                                                                           | <b>(8.1% 41.7%)</b> | <b>31.8%**</b>                                                                                    | <b>(17.8% 57.5%)</b>  |
| GrimAge2                                        | <b>27.6%**</b>                                                                       | <b>(16.4% 44.9%)</b> | <b>21.4%**</b>                                                                           | <b>(9.9% 48.5%)</b> | <b>32.4%**</b>                                                                                    | <b>(17.2% 64.2%)</b>  |
| <b>Pace of aging clock</b>                      |                                                                                      |                      |                                                                                          |                     |                                                                                                   |                       |
| DunedinPoAm                                     | <b>13.6%**</b>                                                                       | <b>(6.7% 23.6%)</b>  | <b>11.4%**</b>                                                                           | <b>(2.8% 27.6%)</b> | <b>22.0%**</b>                                                                                    | <b>(11.0% 38.0%)</b>  |
| <b>Clocks trained on other aging biomarkers</b> |                                                                                      |                      |                                                                                          |                     |                                                                                                   |                       |
| Yang                                            | -1.0%                                                                                | (-4.4% 1.9%)         | 1.2%                                                                                     | (-1.5% 6.0%)        | 0.3%                                                                                              | (-3.9% 4.5%)          |
| Telomere                                        | <b>5.3%</b>                                                                          | <b>(1.7% 10.1%)</b>  | <b>5.7%**</b>                                                                            | <b>(1.9% 13.1%)</b> | 3.5%                                                                                              | (-0.9% 10.9%)         |
| <b>Behavioral/Lifestyle measures</b>            |                                                                                      |                      |                                                                                          |                     |                                                                                                   |                       |
| Sedentary behavior                              | <b>12.9%**</b>                                                                       | <b>(5.9% 23.2%)</b>  | <b>21.2%</b>                                                                             | <b>(9.4% 44.9%)</b> | 6.2%                                                                                              | (-0.4% 17.7%)         |
| Healthy eating index                            | 1.8%                                                                                 | (-6.5% 14.1%)        | 1.3%                                                                                     | (-15.4% 14.5%)      | 3.7%                                                                                              | (-6.3% 14.6%)         |
| Smoking pack years                              | <b>10.6%**</b>                                                                       | <b>(4.8% 18.3%)</b>  | <b>10.4%</b>                                                                             | <b>(2.6% 27.3%)</b> | <b>16.2%**</b>                                                                                    | <b>(7.3% 35.2%)</b>   |
| Alcohol drinker                                 | 1.9%                                                                                 | (-2.5% 7.1%)         | <b>6.6%</b>                                                                              | <b>(1.0% 19.2%)</b> | 2.4%                                                                                              | (-1.7% 10.6%)         |
| <b>Anthropometric measures</b>                  |                                                                                      |                      |                                                                                          |                     |                                                                                                   |                       |
| Waist to thigh ratio                            | <b>5.6%</b>                                                                          | <b>(1.6% 12.6%)</b>  | 3.0%                                                                                     | (-4.1% 12.0%)       | 4.0%                                                                                              | (-3.4% 14.6%)         |
| BMI                                             | 0.4%                                                                                 | (-3.8% 6.3%)         | 3.0%                                                                                     | (-2.7% 13.0%)       | 4.5%                                                                                              | (-7.5% 23.6%)         |
| <b>Clinical used blood Biomarkers</b>           |                                                                                      |                      |                                                                                          |                     |                                                                                                   |                       |
| Total cholesterol                               | 0.0%                                                                                 | (-1.4% 1.6%)         | -0.4%                                                                                    | (-15.5% 8.9%)       | -3.4%                                                                                             | (-16.2% 2.8%)         |
| HDL                                             | 0.1%                                                                                 | (-5.8% 5.9%)         | 0.3%                                                                                     | (-4.7% 5.4%)        | 0.0%                                                                                              | (-3.9% 3.9%)          |
| LDL                                             | -0.1%                                                                                | (-2.3% 1.2%)         | 0.4%                                                                                     | (-13.7% 11.5%)      | -3.9%                                                                                             | (-15.4% 0.7%)         |
| Glucose                                         | 2.3%                                                                                 | (-0.2% 6.5%)         | 1.3%                                                                                     | (-2.0% 6.4%)        | -1.8%                                                                                             | (-12.1% 3.7%)         |
| C-reactive protein                              | <b>2.0%</b>                                                                          | <b>(0.5% 4.5%)</b>   | 0.6%                                                                                     | (-2.7% 4.4%)        | 0.7%                                                                                              | (-3.7% 5.9%)          |

**Supplementary Table 5. Average mediated proportions for DNA methylation and clinical mediators on the relationship between household income and all-cause mortality, NHANES 1999-2002 (n=2,402). Bold indicates statistical significance (p-value<0.05), and bold with two asterisks indicates significance passed Bonferroni adjustment (p-value<0.0021).**

|                                                 | Model 1. PIR<1 (N=372)<br>vs. PIR 5+ (N= 399) |                      | Model 2. PIR 1-2 (N=707)<br>vs. PIR 5+ (N= 399) |                      | Model 3. PIR 2-5 (N=923)<br>vs. PIR 5+ (N= 399) |                      |
|-------------------------------------------------|-----------------------------------------------|----------------------|-------------------------------------------------|----------------------|-------------------------------------------------|----------------------|
|                                                 | Average mediated<br>proportion                | (95% CI)             | Average mediated<br>proportion                  | (95% CI)             | Average mediated<br>proportion                  | (95% CI)             |
| <b>Chronological age clocks</b>                 |                                               |                      |                                                 |                      |                                                 |                      |
| Hannum                                          | 3.0%                                          | (-0.5% 8.2%)         | 2.6%                                            | (-0.8% 6.5%)         | 0.3%                                            | (-7.1% 6.6%)         |
| Hovarth                                         | -0.1%                                         | (-2.6% 1.6%)         | -0.1%                                           | (-3.7% 2.9%)         | -0.6%                                           | (-5.5% 2.5%)         |
| Weidner                                         | 0.2%                                          | (-1.5% 3.1%)         | 0.5%                                            | (-1.6% 2.9%)         | 0.0%                                            | (-1.8% 1.7%)         |
| Lin                                             | 0.2%                                          | (-1.5% 2.7%)         | -0.7%                                           | (-3.0% 0.6%)         | -1.1%                                           | (-6.0% 1.5%)         |
| Vidal-Bralo                                     | -0.3%                                         | (-3.1% 0.9%)         | 0.6%                                            | (-1.9% 3.4%)         | -0.3%                                           | (-3.6% 1.9%)         |
| SkinBlood                                       | -0.2%                                         | (-3.7% 1.7%)         | 0.0%                                            | (-1.1% 1.2%)         | -1.2%                                           | (-5.1% 1.7%)         |
| Zhang                                           | -0.4%                                         | (-2.9% 1.0%)         | -0.5%                                           | (-2.2% 0.7%)         | -1.0%                                           | (-5.3% 1.1%)         |
| <b>Physiological functioning clocks</b>         |                                               |                      |                                                 |                      |                                                 |                      |
| PhenoAge                                        | <b>5.1%</b>                                   | <b>(0.3% 13.4%)</b>  | <b>8.3%</b>                                     | <b>(2.5% 16.5%)</b>  | 4.0%                                            | (-0.8% 15.3%)        |
| GrimAge                                         | <b>32.1%**</b>                                | <b>(20.1% 50.0%)</b> | <b>24.7%**</b>                                  | <b>(14.5% 41.4%)</b> | <b>22.6%**</b>                                  | <b>(9.6% 53.5%)</b>  |
| GrimAge2                                        | <b>36.6%**</b>                                | <b>(22.2% 57.8%)</b> | <b>29.2%**</b>                                  | <b>(17.4% 50.8%)</b> | <b>24.9%**</b>                                  | <b>(10.6% 59.5%)</b> |
| <b>Pace of aging clock</b>                      |                                               |                      |                                                 |                      |                                                 |                      |
| DunedinPoAm                                     | <b>19.5%**</b>                                | <b>(9.8% 35.7%)</b>  | <b>14.1%**</b>                                  | <b>(6.6% 29.0%)</b>  | <b>15.0%</b>                                    | <b>(4.1% 40.5%)</b>  |
| <b>Clocks trained on other aging biomarkers</b> |                                               |                      |                                                 |                      |                                                 |                      |
| Yang                                            | 0.1%                                          | (-4.4% 5.1%)         | 1.0%                                            | (-1.1% 4.8%)         | 0.0%                                            | (-4.0% 1.9%)         |
| Telomere                                        | 1.8%                                          | (-1.2% 7.5%)         | <b>5.4%**</b>                                   | <b>(1.9% 10.3%)</b>  | <b>3.7%</b>                                     | <b>(0.3% 11.4%)</b>  |
| <b>Behavioral/Lifestyle measures</b>            |                                               |                      |                                                 |                      |                                                 |                      |
| Sedentary behavior                              | <b>21.0%</b>                                  | <b>(5.2% 39.7%)</b>  | <b>12.9%</b>                                    | <b>(4.2% 31.0%)</b>  | <b>14.0%</b>                                    | <b>(1.4% 48.4%)</b>  |
| Healthy eating index                            | 4.0%                                          | (-10.9% 16.8%)       | 1.9%                                            | (-3.7% 9.5%)         | 2.9%                                            | (-3.5% 18.1%)        |
| Smoking pack years                              | <b>11.5%**</b>                                | <b>(5.1% 19.8%)</b>  | <b>10.9%**</b>                                  | <b>(3.6% 27.9%)</b>  | <b>12.7%**</b>                                  | <b>(3.8% 31.0%)</b>  |
| Alcohol drinker                                 | -3.7%                                         | (-17.5% 7.4%)        | 2.1%                                            | (-8.5% 13.6%)        | <b>6.0%</b>                                     | <b>(0.3% 16.6%)</b>  |
| <b>Anthropometric measures</b>                  |                                               |                      |                                                 |                      |                                                 |                      |
| Waist to thigh ratio                            | 5.1%                                          | (-1.1% 12.5%)        | 5.8%                                            | (-1.7% 15.3%)        | 8.1%                                            | (-0.0% 21.3%)        |
| BMI                                             | -0.5%                                         | (-11.2% 8.2%)        | -0.4%                                           | (-11.5% 6.0%)        | 2.6%                                            | (-10.4% 17.1%)       |
| <b>Clinical used blood Biomarkers</b>           |                                               |                      |                                                 |                      |                                                 |                      |
| Total cholesterol                               | 0.0%                                          | (-3.6% 3.0%)         | 0.3%                                            | (-1.3% 3.5%)         | -0.4%                                           | (-5.8% 4.5%)         |
| HDL                                             | -4.0%                                         | (-16.7% 5.2%)        | 0.6%                                            | (-7.1% 7.4%)         | 0.1%                                            | (-6.9% 7.6%)         |
| LDL                                             | -1.7%                                         | (-7.9% 1.9%)         | 0.2%                                            | (-2.0% 3.7%)         | -1.6%                                           | (-9.7% 4.3%)         |
| Glucose                                         | <b>6.2%</b>                                   | <b>(1.1% 14.8%)</b>  | 1.2%                                            | (-2.5% 6.8%)         | 4.5%                                            | (-0.1% 12.9%)        |
| C-reactive protein                              | <b>2.0%</b>                                   | <b>(0.3% 5.1%)</b>   | <b>4.9%</b>                                     | <b>(1.3% 10.0%)</b>  | 2.1%                                            | (-0.3% 8.0%)         |
