# Supplementary material
Source: publisher site journal article supplement (doi:10.18632/aging.206377)
Supplement: Supplementary file 9 [file aging-v18i1-206377-supplementary-material-SD21.xlsx]

## Sheet: Supplementary Table 40
Supplementary Table 40. The causal mediation tests for interactions between social positions and DNA methylation and clinical mediators using R mediation package built-in test. The estimates is average causal mediation effects (ACME) differences conditional on treatment status on all-cause mortality, NHANES 1999-2002 (n=2,402). Bold indicates statistical significance (p-value<0.05), and bold with…
		Model 1-1. Black (N= 516) vs. White (N= 943)			Model 1-2. Hispanic (N=860) vs. White (N= 943)			Model 1-3. Other races (N=83) vs. White (N= 943)			Model 2-1. Less than high school (N=1,096) vs. College degree or higher (N= 370)			Model 2-2. High school graduate/GED (N=496) vs. College degree or higher (N= 370)			Model 2-3. Some college or associates degree (N=440) vs. College degree or higher (N= 370)			Model 3-1. PIR<1 (N=373) vs. PIR 5+ (N= 399)			Model 3-2. PIR 1-2 (N=707) vs. PIR 5+ (N= 399)			Model 3-3. PIR 2-5 (N=923) vs. PIR 5+ (N= 399)			Model 4-1. Semi-routine white collar (N=411) vs. White collar (N= 535)			Model 4-2. High skill blue collar (N=389) vs. White collar (N= 535)			Model 4-3. Semi-routine blue collar (N=1,004) vs. White collar (N= 535)			Model 4-4. Never worked (N=63) vs. White collar (N= 535)
		ACME(1) - ACME(0)	p-value		ACME(1) - ACME(0)	p-value		ACME(1) - ACME(0)	p-value		ACME(1) - ACME(0)	p-value		ACME(1) - ACME(0)	p-value		ACME(1) - ACME(0)	p-value		ACME(1) - ACME(0)	p-value		ACME(1) - ACME(0)	p-value		ACME(1) - ACME(0)	p-value		ACME(1) - ACME(0)	p-value		ACME(1) - ACME(0)	p-value		ACME(1) - ACME(0)	p-value		ACME(1) - ACME(0)	p-value
Chronological age clocks
Hannum		-0.038235	0.708		0.084995	0.27		0.076384	0.61		0.19702	0.02		0.031631	0.736		-0.00055385	0.974		0.22026	0.118		0.19267	0.11		0.0044299	0.968		0.0021788	0.988		0.16793	0.132		0.043873	0.306		0.093171	0.752
Hovarth		-0.034631	0.478		-0.080872	0.226		-0.029068	0.822		-0.020871	0.768		-0.022849	0.668		-0.055081	0.464		-0.093918	0.578		-0.013046	0.884		-0.029003	0.646		0.0037459	0.92		0.00060871	0.984		-0.02674	0.544		-0.11087	0.728
Weidner		-0.038174	0.44		-0.059226	0.38		-1.1375	0.07		-0.10329	0.33		0.00055695	0.992		-0.0099057	0.886		-0.09453	0.606		0.0037993	0.922		0.00048505	0.974		-0.0087307	0.898		-0.0012868	0.96		0.0025658	0.936		-0.10719	0.822
Lin		-0.033008	0.486		-0.076156	0.3		-0.16161	0.572		-0.035439	0.642		-0.015467	0.77		-0.074554	0.356		-0.23167	0.24		-0.10892	0.272		-0.043623	0.372		0.0047542	0.878		-0.011026	0.858		0.012781	0.742		0.092883	0.774
Vidal-Bralo		-0.084767	0.664		-0.17237	0.196		-0.37768	0.536		-0.074521	0.428		-0.0065526	0.906		-0.0017645	0.988		-0.12977	0.476		0.065704	0.586		-0.02415	0.728		-0.063939	0.37		0.0012651	0.964		0.035814	0.486		-0.10497	0.83
SkinBlood		-0.070418	0.114		0.0035417	0.936		0.036432	0.768		0.13048	0.084		0.012196	0.834		-0.016162	0.8		-0.086122	0.588		-0.0025346	0.966		-0.091943	0.162		-0.020116	0.728		0.10613	0.204		0.033028	0.428		0.079434	0.79
Zhang		-0.12593	0.1		-0.02165	0.528		-0.054626	0.554		0.057781	0.358		0.0069043	0.814		-0.05629	0.324		-0.09347	0.5		-0.07205	0.35		-0.06919	0.172		-0.0051169	0.918		0.065985	0.29		-0.023604	0.54		0.22682	0.496
Physiological functioning clocks
PhenoAge		-0.033087	0.394		0.09499	0.122		-0.026442	0.894		0.39483	0.052		0.086015	0.386		0.061188	0.41		0.68798	0.006		0.44336	0.022		0.15324	0.098		0.04278	0.58		0.16766	0.234		0.028609	0.454		0.50399	0.314
GrimAge		0.15079	0.088		0.10722	0.176		0.021741	0.824		0.8293	0.024		0.19822	0.238		0.20722	0.254		0.83688	0.068		0.82091	2.2e-16		0.27744	0.018		0.16816	0.204		0.34911	0.182		0.13063	0.326		0.033524	0.906
GrimAge2		0.15354	0.254		0.30087	0.002		-0.031575	0.844		0.91837	0.074		0.22968	0.258		0.20956	0.302		1.1569	0.026		0.98921	2.2e-16		0.37594	0.014		0.25231	0.098		0.39734	0.176		0.1497	0.414		0.072301	0.812
Pace of aging clock
DunedinPoAm		0.069984	0.536		0.51688	0.002		-0.32739	0.448		0.095044	0.812		0.019158	0.968		-0.11835	0.726		0.56544	0.35		0.18854	0.54		0.095	0.456		0.11316	0.5		0.083669	0.784		-0.0012995	0.978		0.21669	0.68
Clocks trained on other aging biomarkers
Yang		-0.13722	0.518		0.16525	0.29		1.4745	0.002		-0.047563	0.752		-0.16526	0.146		0.02913	0.72		-0.013989	0.968		-0.076734	0.652		-0.0020733	0.984		-0.00076055	0.964		-0.010358	0.93		0.010029	0.948		0.31432	0.576
Telomere		0.21461	0.512		0.030487	0.814		0.43326	0.1		0.26626	0.086		0.047526	0.654		0.017991	0.778		0.22284	0.262		0.062785	0.678		0.017465	0.78		-0.015972	0.838		0.023468	0.83		0.0010119	0.996		-0.055949	0.924
Behavioral/Lifestyle measures
Sedentary behavior		0.015524	0.934		0.15172	0.314		-0.66478	0.164		0.64627	0.356		0.025771	0.952		0.25327	0.178		0.41305	0.568		0.70384	0.134		0.32857	0.16		0.21556	0.156		0.93621	0.022		0.50161	0.186		0.32494	0.546
Healthy eating index		-0.11899	0.242		0.028011	0.732		-0.0017138	0.996		-0.53189	0.272		-0.12092	0.786		-0.29524	0.148		-0.19459	0.816		-0.12487	0.802		-0.050402	0.868		0.17599	0.216		0.086541	0.772		0.2197	0.332		1.3199	0.258
Smoking pack years		0.019061	0.82		-0.092056	0.42		0.68814	0.146		0.40676	0.254		0.27986	0.33		0.25406	0.316		-0.32951	0.294		0.19192	0.66		0.091653	0.694		0.21665	0.082		0.44442	0.108		-0.0065759	0.952		-0.26812	0.67
Alcohol drinker		0.11318	0.42		0.12107	0.3		1.0594	0.354		0.35636	0.26		-0.054084	0.776		0.071406	0.62		1.0185	0.114		0.30655	0.56		-0.025082	0.938		0.030533	0.492		0.9115	0.002		0.24529	0.3		0.60657	0.232
Anthropometric measures
Waist to thigh ratio		0.23561	0.204		0.058805	0.546		-0.015737	0.974		0.31258	0.178		0.023361	0.868		0.033007	0.722		-0.35582	0.37		-0.21889	0.486		-0.16797	0.122		0.012795	0.844		0.078234	0.672		-0.026018	0.87		-0.66768	0.364
BMI		0.089738	0.568		-0.01535	0.93		0.099827	0.806		0.42511	0.108		0.13725	0.298		0.14379	0.64		-0.58997	0.212		-0.43014	0.29		-0.32022	0.264		0.077148	0.542		0.14061	0.51		0.36211	0.306		0.41077	0.462
Clinical used blood Biomarkers
Total cholesterol		-0.015522	0.744		-0.0036568	0.97		-0.19995	0.54		-0.082466	0.49		-0.32172	0.136		-0.10475	0.668		0.10494	0.512		0.03385	0.862		0.096203	0.624		-0.079299	0.472		0.010232	0.894		0.15445	0.122		0.07126	0.958
HDL		-0.12087	0.164		-0.24238	0.038		0.15246	0.672		-0.023806	0.886		-0.03146	0.834		-0.017021	0.89		0.2607	0.658		-0.27054	0.326		-0.11017	0.54		3.5676e-05	0.99		0.082941	0.618		-0.27809	0.26		-0.025731	0.948
LDL		-0.017633	0.666		0.036976	0.694		-0.13199	0.73		-0.1187	0.33		-0.39121	0.044		-0.061231	0.73		0.11533	0.566		-0.10934	0.628		-0.04788	0.848		-0.10763	0.306		0.015682	0.854		0.12969	0.308		-0.081759	0.926
Glucose		-0.044052	0.656		-0.057791	0.304		-0.51151	0.286		0.18731	0.292		0.044671	0.58		0.028097	0.692		0.37943	0.39		0.44788	0.084		0.14066	0.252		-0.017427	0.738		-0.033693	0.722		-0.033082	0.716		0.54444	0.318
C-reactive protein		0.15782	0.078		0.03273	0.312		0.016249	0.896		0.053592	0.458		-0.0030707	0.94		0.006846	0.896		0.85423	0.002		0.90765	0.008		0.20413	0.058		0.12598	0.394		0.26576	0.036		0.18995	0.048		-0.007535	0.994
