# Supplementary material
Source: publisher site journal article supplement (doi:10.18632/aging.206377)
Supplement: Supplementary file 10 [file aging-v18i1-206377-supplementary-material-SD3.xlsx]

## Sheet: Supplementary Table 1
Supplementary Table 1. Survival analysis for socioeconomic positions on all-cause mortality, controlled by gender, age, age2, and nativity, NHANES 1999-2002 (n=2,402). Bold indicates statistical significance (pvalue<0.05).
	All-cause mortality					Cardiovascular-specific mortality					Cancer-specific mortality
	HR	(95% CI)		Mortality Rate per 10 000*		HR	(95% CI)		Mortality Rate per 10 000*		HR	(95% CI)		Mortality Rate per 10 000*
Race and ethnicity
Non-Hispanic White	ref			299.934		ref			43.8211		ref			16.46
Non-Hispanic Black	1.50735	1.24559	1.82412	399.68		2.11687	1.25072	3.58283	79.6307		1.38564	0.904388	2.12297	17.8956
Hispanic	1.39866	1.11553	1.75364	285.827		1.10891	0.58951	2.08593	52.6225		1.06408	0.593015	1.90935	22.361
Other races	1.32778	0.68196	2.58521	262.213		0.273588	0.058675	1.27567	35.7721		1.01576	0.274273	3.76182	0
Education attainment
College degree or higher	ref			235.097		ref			44.3297		ref			6.59665
Some college	1.77567	1.32743	2.37526	253.149		1.58494	0.597258	4.20597	38.3874		3.34336	1.52424	7.33352	10.9014
High school graduate/GED	1.898	1.36834	2.63267	319.262		1.14841	0.519597	2.53822	46.1211		3.21254	1.41487	7.29424	16.1957
Less than high school	2.71041	1.97666	3.71654	367.914		1.54062	0.681808	3.48121	64.861		3.53164	1.43327	8.70209	26.8703
Household income
PIR 5+	ref			215.686		ref			24.6503		ref			4.42026
PIR 2-5	1.63127	1.24205	2.14247	287.581		1.21835	0.525907	2.82252	39.1941		1.25518	0.691488	2.2784	23.027
PIR 1-2	2.64175	1.74855	3.99123	378.841		2.46854	0.930238	6.55065	74.8299		1.88311	0.948915	3.73701	17.9526
PIR<1	2.996	2.17714	4.12285	392.301		4.32619	1.62645	11.5072	81.941		1.70474	0.938871	3.09534	24.5516
Longest held occupation
White collar and professional	ref			266.544		ref			43.3015		ref			17.474
White collar, semi-routine	1.23922	0.846306	1.81454	269.214		0.642784	0.284296	1.45331	32.3343		1.53154	0.823279	2.84912	14.1338
Blue collar, high skill	1.64354	1.18907	2.27171	374.003		1.01244	0.550514	1.86196	71.0796		2.63333	1.49674	4.633	21.2889
Blue collar, semi-routine	1.54508	1.12516	2.12173	338.497		1.26164	0.6831	2.33016	59.789		1.94527	1.13417	3.33643	19.1277
Never worked	1.31257	0.680823	2.53053	432.968		0.539716	0.15443	1.88624	114.408		1.43191	0.521512	3.9316	9.44747
* Mortality Rate per 10 000 were calculated by raw data startified by age groups reported by CDC 2022.
