# Supplementary material
Source: publisher site journal article supplement (doi:10.18632/aging.206377)
Supplement: Supplementary file 10 [file aging-v18i1-206377-supplementary-material-SD6.pdf]

**Supplementary Table 7. Average mediated proportions for DNA methylation and clinical mediators on the relationship between race and ethnicity and cardiovascular-specific mortality, NHANES 1999-2002 (n=2,402). Bold indicates statistical significance (p-value<0.05), and bold with two asterisks indicates significance passed Bonferroni adjustment (p-value<0.0021).**

|                                                 | Model 1. Black (N= 516)<br>vs. White (N= 943) |                        | Model 2. Hispanic (N=860)<br>vs. White (N= 943) |                  | Model 3. Other races (N=83)<br>vs. White (N= 943) |                 |
|-------------------------------------------------|-----------------------------------------------|------------------------|-------------------------------------------------|------------------|---------------------------------------------------|-----------------|
|                                                 | Average mediated proportion                   | (95% CI)               | Average mediated proportion                     | (95% CI)         | Average mediated proportion                       | (95% CI)        |
| <b>Chronological age clocks</b>                 |                                               |                        |                                                 |                  |                                                   |                 |
| Hannum                                          | -3.6%                                         | (-15.4% 14.2%)         | 1.2%                                            | (-74.1% 88.9%)   | -0.1%                                             | (-11.3% 8.8%)   |
| Hovarth                                         | -0.7%                                         | (-5.6% 1.9%)           | 0.1%                                            | (-37.3% 30.2%)   | 0.0%                                              | (-4.8% 4.5%)    |
| Weidner                                         | 0.0%                                          | (-4.9% 6.5%)           | -0.4%                                           | (-77.3% 71.0%)   | -0.3%                                             | (-24.7% 19.3%)  |
| Lin                                             | -0.1%                                         | (-4.7% 4.8%)           | -0.3%                                           | (-59.8% 60.2%)   | -0.1%                                             | (-14.0% 12.6%)  |
| Vidal-Bralo                                     | -2.6%                                         | (-17.9% 11.5%)         | -0.9%                                           | (-153.0% 132.5%) | 0.3%                                              | (-22.6% 16.8%)  |
| SkinBlood                                       | -2.0%                                         | (-9.7% 6.7%)           | 0.1%                                            | (-20.4% 30.9%)   | -0.1%                                             | (-9.2% 7.9%)    |
| Zhang                                           | -4.0%                                         | (-16.8% 7.4%)          | -0.2%                                           | (-24.3% 22.5%)   | 0.3%                                              | (-9.3% 9.8%)    |
| <b>Physiological functioning clocks</b>         |                                               |                        |                                                 |                  |                                                   |                 |
| PhenoAge                                        | 0.5%                                          | (-3.2% 7.3%)           | -1.4%                                           | (-94.0% 86.9%)   | 0.7%                                              | (-18.0% 20.6%)  |
| GrimAge                                         | <b>17.2%**</b>                                | <b>(6.6% 55.5%)</b>    | 3.7%                                            | (-207.4% 199.3%) | -2.9%                                             | (-38.8% 21.0%)  |
| GrimAge2                                        | <b>22.6%**</b>                                | <b>(8.7% 63.4%)</b>    | 15.5%                                           | (-508.3% 538.3%) | -5.7%                                             | (-94.2% 36.5%)  |
| <b>Pace of aging clock</b>                      |                                               |                        |                                                 |                  |                                                   |                 |
| DunedinPoAm                                     | <b>10.1%</b>                                  | <b>(2.0% 42.8%)</b>    | 9.9%                                            | (-410.7% 444.4%) | -5.7%                                             | (-50.2% 12.9%)  |
| <b>Clocks trained on other aging biomarkers</b> |                                               |                        |                                                 |                  |                                                   |                 |
| Yang                                            | 5.9%                                          | (-31.4% 36.2%)         | 4.8%                                            | (-224.1% 287.9%) | -3.8%                                             | (-62.4% 30.8%)  |
| Telomere                                        | -15.5%                                        | (-43.2% 12.9%)         | 0.3%                                            | (-54.5% 68.6%)   | -1.5%                                             | (-32.9% 16.3%)  |
| <b>Behavioral/Lifestyle measures</b>            |                                               |                        |                                                 |                  |                                                   |                 |
| Sedentary behavior                              | <b>25.9%**</b>                                | <b>(11.2% 91.9%)</b>   | 20.4%                                           | (-635.6% 610.1%) | -11.2%                                            | (-122.4% 29.5%) |
| Healthy eating index                            | -2.6%                                         | (-15.0% 2.5%)          | 0.0%                                            | (-49.6% 42.9%)   | 0.0%                                              | (-8.5% 7.0%)    |
| Smoking pack years                              | <b>-5.1%</b>                                  | <b>(-12.5% - 0.2%)</b> | -4.8%                                           | (-116.5% 152.5%) | 1.6%                                              | (-11.1% 20.6%)  |
| Alcohol drinker                                 | <b>11.9%</b>                                  | <b>(0.7% 43.2%)</b>    | 5.7%                                            | (-218.4% 219.6%) | -14.7%                                            | (-102.4% 75.8%) |
| <b>Anthropometric measures</b>                  |                                               |                        |                                                 |                  |                                                   |                 |
| Waist to thigh ratio                            | <b>-18.9%</b>                                 | <b>(-66.6% - 3.8%)</b> | 10.2%                                           | (-260.1% 343.1%) | -4.1%                                             | (-81.8% 48.0%)  |
| BMI                                             | 1.3%                                          | (-11.6% 32.6%)         | 0.4%                                            | (-116.9% 202.3%) | 0.0%                                              | (-17.2% 14.5%)  |
| <b>Clinical used blood Biomarkers</b>           |                                               |                        |                                                 |                  |                                                   |                 |
| Total cholesterol                               | 0.2%                                          | (-6.3% 5.8%)           | 0.0%                                            | (-31.6% 34.7%)   | 0.1%                                              | (-11.1% 10.8%)  |
| HDL                                             | 1.5%                                          | (-5.9% 10.3%)          | 2.1%                                            | (-245.2% 198.8%) | 0.4%                                              | (-20.6% 23.6%)  |
| LDL                                             | 0.2%                                          | (-2.5% 4.6%)           | -0.1%                                           | (-38.3% 43.6%)   | -0.1%                                             | (-9.9% 7.6%)    |
| Glucose                                         | <b>6.8%</b>                                   | <b>(1.0% 24.0%)</b>    | 5.3%                                            | (-161.3% 119.6%) | -4.0%                                             | (-41.0% 29.2%)  |
| C-reactive protein                              | 0.7%                                          | (-8.8% 7.3%)           | 0.1%                                            | (-11.9% 17.1%)   | 0.0%                                              | (-3.2% 3.4%)    |

**Supplementary Table 8. Average mediated proportions for DNA methylation and clinical mediators on the relationship between education attainment and cardiovascular-specific mortality, NHANES 1999-2002 (n=2,402). Bold indicates statistical significance (p-value<0.05), and bold with two asterisks indicates significance passed Bonferroni adjustment (p-value<0.0021).**

|                                                 | <b>Model 1. Less than high school (N=1,096) vs. College degree or higher (N= 370)</b> |                 |         | <b>Model 2. High school graduate/GED (N=496) vs. College degree or higher (N= 370)</b> |                 |          | <b>Model 3. Some college or associates degree (N=440) vs. College degree or higher (N= 370)</b> |                 |         |
|-------------------------------------------------|---------------------------------------------------------------------------------------|-----------------|---------|----------------------------------------------------------------------------------------|-----------------|----------|-------------------------------------------------------------------------------------------------|-----------------|---------|
|                                                 | <b>Average mediated proportion</b>                                                    | <b>(95% CI)</b> |         | <b>Average mediated proportion</b>                                                     | <b>(95% CI)</b> |          | <b>Average mediated proportion</b>                                                              | <b>(95% CI)</b> |         |
| <b>Chronological age clocks</b>                 |                                                                                       |                 |         |                                                                                        |                 |          |                                                                                                 |                 |         |
| Hannum                                          | -1.7%                                                                                 | (-57.7%         | 82.6%)  | 1.1%                                                                                   | (-76.1%         | 87.7%)   | 0.1%                                                                                            | (-38.7%         | 36.1%)  |
| Hovarth                                         | 0.0%                                                                                  | (-8.2%          | 7.5%)   | 0.1%                                                                                   | (-29.6%         | 31.4%)   | 1.5%                                                                                            | (-46.9%         | 38.3%)  |
| Weidner                                         | -0.7%                                                                                 | (-29.4%         | 35.3%)  | 0.0%                                                                                   | (-64.8%         | 29.6%)   | -0.1%                                                                                           | (-29.3%         | 38.6%)  |
| Lin                                             | 0.0%                                                                                  | (-17.6%         | 7.5%)   | -0.1%                                                                                  | (-28.6%         | 44.2%)   | 0.8%                                                                                            | (-55.9%         | 32.3%)  |
| Vidal-Bralo                                     | -0.1%                                                                                 | (-15.7%         | 14.7%)  | 0.0%                                                                                   | (-41.3%         | 36.6%)   | -0.4%                                                                                           | (-22.4%         | 15.8%)  |
| SkinBlood                                       | -0.6%                                                                                 | (-35.0%         | 12.4%)  | 2.1%                                                                                   | (-144.9%        | 96.5%)   | 0.5%                                                                                            | (-16.5%         | 26.4%)  |
| Zhang                                           | 0.0%                                                                                  | (-8.3%          | 8.8%)   | 0.2%                                                                                   | (-22.0%         | 43.2%)   | 0.7%                                                                                            | (-20.6%         | 23.7%)  |
| <b>Physiological functioning clocks</b>         |                                                                                       |                 |         |                                                                                        |                 |          |                                                                                                 |                 |         |
| PhenoAge                                        | 1.6%                                                                                  | (-36.1%         | 52.0%)  | -0.5%                                                                                  | (-117.6%        | 101.0%)  | -1.7%                                                                                           | (-86.0%         | 81.4%)  |
| GrimAge                                         | 51.0%                                                                                 | (-335.8%        | 531.6%) | 23.8%                                                                                  | (-686.2%        | 733.5%)  | 12.0%                                                                                           | (-168.5%        | 212.3%) |
| GrimAge2                                        | 60.9%                                                                                 | (-255.1%        | 610.7%) | 19.5%                                                                                  | (-440.8%        | 634.5%)  | 15.7%                                                                                           | (-281.5%        | 232.3%) |
| <b>Pace of aging clock</b>                      |                                                                                       |                 |         |                                                                                        |                 |          |                                                                                                 |                 |         |
| DunedinPoAm                                     | 18.7%                                                                                 | (-248.0%        | 269.5%) | 3.7%                                                                                   | (-177.3%        | 194.5%)  | 14.1%                                                                                           | (-220.8%        | 268.1%) |
| <b>Clocks trained on other aging biomarkers</b> |                                                                                       |                 |         |                                                                                        |                 |          |                                                                                                 |                 |         |
| Yang                                            | 6.2%                                                                                  | (-48.1%         | 72.3%)  | -0.6%                                                                                  | (-112.2%        | 115.6%)  | 1.1%                                                                                            | (-42.9%         | 37.1%)  |
| Telomere                                        | 5.8%                                                                                  | (-46.7%         | 50.9%)  | 0.6%                                                                                   | (-130.4%        | 71.3%)   | -0.7%                                                                                           | (-30.8%         | 29.2%)  |
| <b>Behavioral/Lifestyle measures</b>            |                                                                                       |                 |         |                                                                                        |                 |          |                                                                                                 |                 |         |
| Sedentary behavior                              | 28.7%                                                                                 | (-629.4%        | 548.1%) | 53.8%                                                                                  | (-1,118.9%      | 1312.3%) | 13.1%                                                                                           | (-292.9%        | 196.2%) |
| Healthy eating index                            | -14.5%                                                                                | (-153.0%        | 140.7%) | -8.2%                                                                                  | (-330.4%        | 367.9%)  | -3.3%                                                                                           | (-86.7%         | 63.5%)  |
| Smoking pack years                              | 22.7%                                                                                 | (-301.1%        | 272.8%) | 12.0%                                                                                  | (-302.9%        | 408.7%)  | -8.5%                                                                                           | (-99.0%         | 144.2%) |
| Alcohol drinker                                 | 5.3%                                                                                  | (-110.1%        | 139.0%) | 9.8%                                                                                   | (-517.8%        | 332.7%)  | 5.8%                                                                                            | (-87.7%         | 165.8%) |
| <b>Anthropometric measures</b>                  |                                                                                       |                 |         |                                                                                        |                 |          |                                                                                                 |                 |         |
| Waist to thigh ratio                            | 7.4%                                                                                  | (-106.0%        | 105.0%) | 3.1%                                                                                   | (-129.6%        | 133.4%)  | 3.1%                                                                                            | (-55.4%         | 81.2%)  |
| BMI                                             | -2.0%                                                                                 | (-70.5%         | 115.5%) | -2.5%                                                                                  | (-138.6%        | 143.0%)  | 12.0%                                                                                           | (-125.7%        | 188.6%) |
| <b>Clinical used blood Biomarkers</b>           |                                                                                       |                 |         |                                                                                        |                 |          |                                                                                                 |                 |         |
| Total cholesterol                               | 0.1%                                                                                  | (-31.9%         | 41.4%)  | -4.2%                                                                                  | (-174.4%        | 210.4%)  | 2.5%                                                                                            | (-124.7%        | 118.7%) |
| HDL                                             | -4.9%                                                                                 | (-95.7%         | 102.3%) | -0.6%                                                                                  | (-81.2%         | 80.1%)   | 0.6%                                                                                            | (-40.4%         | 42.5%)  |
| LDL                                             | -0.9%                                                                                 | (-75.5%         | 79.9%)  | -0.5%                                                                                  | (-194.1%        | 201.6%)  | -0.2%                                                                                           | (-94.4%         | 107.8%) |
| Glucose                                         | 12.4%                                                                                 | (-218.9%        | 219.7%) | 0.1%                                                                                   | (-62.0%         | 73.4%)   | -0.3%                                                                                           | (-51.9%         | 52.0%)  |
| C-reactive protein                              | 1.0%                                                                                  | (-28.0%         | 35.6%)  | -0.6%                                                                                  | (-51.5%         | 59.1%)   | 0.1%                                                                                            | (-8.8%          | 8.4%)   |

**Supplementary Table 9. Average mediated proportions for DNA methylation and clinical mediators on the relationship between household income and cardiovascular-specific mortality, NHANES 1999-2002 (n=2,402). Bold indicates statistical significance (p-value<0.05), and bold with two asterisks indicates significance passed Bonferroni adjustment (p-value<0.0021).**

|                                                 | Model 1. PIR<1 (N=373)<br>vs. PIR 5+ (N= 399) |                      | Model 2. PIR 1-2 (N=707)<br>vs. PIR 5+ (N= 399) |                 | Model 3. PIR 2-5 (N=923)<br>vs. PIR 5+ (N= 399) |                 |
|-------------------------------------------------|-----------------------------------------------|----------------------|-------------------------------------------------|-----------------|-------------------------------------------------|-----------------|
|                                                 | Average mediated<br>proportion                | (95% CI)             | Average<br>mediated<br>proportion               | (95% CI)        | Average mediated<br>proportion                  | (95% CI)        |
| <b>Chronological age clocks</b>                 |                                               |                      |                                                 |                 |                                                 |                 |
| Hannum                                          | 0.5%                                          | (-6.0% 6.5%)         | 0.0%                                            | (-13.2% 7.1%)   | 0.0%                                            | (-22.0% 21.7%)  |
| Hovarth                                         | 0.7%                                          | (-2.9% 6.2%)         | 0.0%                                            | (-5.7% 4.9%)    | -0.1%                                           | (-15.7% 11.7%)  |
| Weidner                                         | 0.0%                                          | (-6.4% 5.1%)         | -0.8%                                           | (-29.3% 9.6%)   | 0.0%                                            | (-14.1% 15.8%)  |
| Lin                                             | -0.2%                                         | (-7.3% 7.9%)         | 0.7%                                            | (-6.1% 11.4%)   | -0.1%                                           | (-19.4% 18.4%)  |
| Vidal-Bralo                                     | -0.1%                                         | (-4.6% 2.6%)         | -0.4%                                           | (-11.4% 5.3%)   | -0.1%                                           | (-29.3% 16.9%)  |
| SkinBlood                                       | 0.2%                                          | (-6.7% 8.3%)         | 0.0%                                            | (-4.9% 6.6%)    | -0.8%                                           | (-37.4% 33.5%)  |
| Zhang                                           | 0.4%                                          | (-2.2% 5.7%)         | 0.2%                                            | (-6.0% 6.5%)    | -1.3%                                           | (-41.5% 21.6%)  |
| <b>Physiological functioning clocks</b>         |                                               |                      |                                                 |                 |                                                 |                 |
| PhenoAge                                        | -3.7%                                         | (-20.1% 2.1%)        | -1.3%                                           | (-30.4% 17.2%)  | -1.1%                                           | (-47.3% 50.9%)  |
| GrimAge                                         | <b>23.4%**</b>                                | <b>(11.2% 49.9%)</b> | 27.3%                                           | (-36.2% 122.2%) | 7.9%                                            | (-152.7%183.1%) |
| GrimAge2                                        | <b>25.7%**</b>                                | <b>(11.2% 61.9%)</b> | 33.1%                                           | (-62.3% 201.6%) | 9.1%                                            | (-289.5%225.5%) |
| <b>Pace of aging clock</b>                      |                                               |                      |                                                 |                 |                                                 |                 |
| DunedinPoAm                                     | 15.7%                                         | (-1.1% 47.1%)        | 14.6%                                           | (-32.5% 98.0%)  | 5.4%                                            | (-223.1%197.6%) |
| <b>Clocks trained on other aging biomarkers</b> |                                               |                      |                                                 |                 |                                                 |                 |
| Yang                                            | 0.3%                                          | (-12.1% 11.5%)       | 1.5%                                            | (-22.2% 38.4%)  | 0.0%                                            | (-55.2% 45.3%)  |
| Telomere                                        | -1.9%                                         | (-21.0% 4.4%)        | -2.9%                                           | (-48.2% 24.3%)  | 1.3%                                            | (-31.5% 55.3%)  |
| <b>Behavioral/Lifestyle measures</b>            |                                               |                      |                                                 |                 |                                                 |                 |
| Sedentary behavior                              | 12.6%                                         | (-33.4% 70.4%)       | 40.5%                                           | (-199.0%301.0%) | 22.1%                                           | (-534.7%390.8%) |
| Healthy eating index                            | 6.7%                                          | (-12.1% 26.4%)       | -9.4%                                           | (-77.8% 13.8%)  | -3.9%                                           | (-71.0% 104.5%) |
| Smoking pack years                              | 3.3%                                          | (-3.5% 13.8%)        | 3.1%                                            | (-21.3% 29.2%)  | 4.7%                                            | (-101.5%149.9%) |
| Alcohol drinker                                 | 8.9%                                          | (-8.4% 38.4%)        | -1.2%                                           | (-67.2% 53.8%)  | 16.7%                                           | (-301.7%310.6%) |
| <b>Anthropometric measures</b>                  |                                               |                      |                                                 |                 |                                                 |                 |
| Waist to thigh ratio                            | 14.9%                                         | (-0.4% 50.4%)        | 11.2%                                           | (-10.5% 68.5%)  | 4.7%                                            | (-206.7%177.7%) |
| BMI                                             | 0.0%                                          | (-15.5% 14.0%)       | -15.3%                                          | (-77.4% 47.2%)  | 22.3%                                           | (-192.0%230.1%) |
| <b>Clinical used blood Biomarkers</b>           |                                               |                      |                                                 |                 |                                                 |                 |
| Total cholesterol                               | -0.1%                                         | (-11.2% 9.9%)        | 1.1%                                            | (-14.0% 27.1%)  | -0.2%                                           | (-94.6% 90.6%)  |
| HDL                                             | 3.8%                                          | (-10.5% 30.8%)       | -3.3%                                           | (-93.2% 41.9%)  | 0.5%                                            | (-98.7% 115.3%) |
| LDL                                             | -2.9%                                         | (-21.4% 8.0%)        | 0.2%                                            | (-26.7% 19.3%)  | -0.5%                                           | (-112.7% 93.4%) |
| Glucose                                         | <b>6.7%</b>                                   | <b>(1.3% 27.6%)</b>  | 1.8%                                            | (-13.5% 31.9%)  | 3.3%                                            | (-96.1% 75.8%)  |
| C-reactive protein                              | 1.7%                                          | (-0.8% 9.8%)         | 1.9%                                            | (-11.0% 17.7%)  | -0.5%                                           | (-22.6% 21.0%)  |
