# Supplementary material
Source: publisher site journal article supplement (doi:10.18632/aging.206377)
Supplement: Supplementary file 11 [file aging-v18i1-206377-supplementary-material-SD5.xlsx]

## Sheet: Supplementary Table 6
Supplementary Table 6. Average mediated proportions for DNA methylation and clinical mediators on the relationship between occupation status and all-cause mortality, NHANES 1999-2002 (n=2,402). Bold indicates statistical significance (p-value<0.05), and bold with two asterisks indicates significance passed Bonferroni adjustment (p-value<0.0021).
	Model 1. Semi-routine white collar (N=411) vs. White collar (N= 535)				Model 2. High skill blue collar (N=389) vs. White collar (N= 535)				Model 3. Semi-routine blue collar (N=1,004) vs. White collar (N= 535)				Model 4. Never worked (N=63) vs. White collar (N= 535)
	Average mediated proportion	(95% CI)			Average mediated proportion	(95% CI)			Average mediated proportion	(95% CI)			Average mediated proportion	(95% CI)
Chronological age clocks
Hannum	0.00752946	-0.92571	0.862764		0.100284	0.0223693	0.27054		0.0216582	-0.016985	0.0975852		0.161048	-3.5529	2.31523
Hovarth	0.0030439	-0.395505	0.389483		0.0010933	-0.0371778	0.0421581		-0.00904693	-0.0761292	0.0213339		0.0437482	-1.08082	1.09057
Weidner	0.000173339	-0.165717	0.145139		-0.000317605	-0.0371082	0.0268133		-0.000453905	-0.0316855	0.0314253		-0.00167425	-0.290933	0.258642
Lin	0.000303141	-0.20295	0.366556		-0.00152271	-0.0440261	0.0323345		0.00208646	-0.0203422	0.0368617		0.000364741	-0.358446	0.353642
Vidal-Bralo	-0.00719487	-0.292754	0.350808		-0.00376443	-0.0416758	0.0182056		-0.0288393	-0.118519	-0.000414997		0.00344162	-0.601824	0.630311
SkinBlood	-0.00471345	-0.520746	0.54834		0.0271378	-0.0106367	0.126837		0.00398328	-0.0140897	0.0579977		0.0123668	-0.475732	0.905098
Zhang	-0.00218106	-0.528298	0.498741		0.0178145	-0.012312	0.102542		-0.00544361	-0.0478569	0.0181136		0.0349944	-1.17873	1.25773
Physiological functioning clocks
PhenoAge	0.0484953	-1.44115	1.18469		0.0904708	0.0208291	0.351067		0.0472316	-0.0026107	0.175288		0.131558	-2.41223	2.81824
GrimAge	0.457836	-4.87712	6.66358		0.470584	0.242586	1.1251		0.366196	0.199189	0.87058		0.420114	-6.05665	6.00155
GrimAge2	0.483626	-7.12379	5.99414		0.515827	0.256291	1.28383		0.437628	0.241174	0.927936		0.417868	-5.60405	7.35936
Pace of aging clock
DunedinPoAm	0.398104	-3.34521	4.61994		0.255434	0.111422	0.685078		0.253227	0.134874	0.665575		0.246308	-4.61344	3.44122
Clocks trained on other aging biomarkers
Yang	-0.000195855	-0.284507	0.270694		0.00266088	-0.0612934	0.0741979		0.000680679	-0.044451	0.0418573		-0.00279005	-0.305102	0.291616
Telomere	-0.0145592	-1.70274	0.809474		0.0609947	0.0087022	0.155571		0.0242795	-0.0428817	0.10955		0.0788992	-1.03607	1.41481
Behavioral/Lifestyle measures
Sedentary behavior	0.0961455	-0.97184	1.46286		0.291653	0.106774	0.853808		0.350587	0.174575	1.04345		0.151811	-2.85526	3.03926
Healthy eating index	0.0260637	-0.475213	0.523336		0.15612	0.00979873	0.546133		0.210777	0.00376474	0.959018		0.0775405	-2.35684	2.08062
Smoking pack years	0.222752	-1.91437	2.80106		0.26996	0.110063	0.714067		0.198927	0.0805034	0.66209		0.250867	-3.26052	5.00708
Alcohol drinker	0.0447754	-0.668341	0.658029		0.0331997	-0.0742685	0.198084		0.12968	0.0496095	0.447946		0.0720216	-1.72322	1.3171
Anthropometric measures
Waist to thigh ratio	0.0332014	-0.584055	0.882456		0.121575	0.022111	0.479754		0.191818	0.0805637	0.944621		0.249005	-6.1575	5.98792
BMI	0.0168281	-0.594574	0.665796		0.0395051	-0.0309804	0.286724		0.0337733	-0.115387	0.353056		-0.0217204	-2.0088	2.15625
Clinical used blood Biomarkers
Total cholesterol	0.0252982	-0.275216	0.447706		-0.000632713	-0.0357226	0.0335187		-0.0187603	-0.0952203	0.0126535		0.00235344	-1.08462	1.42648
HDL	0.00115496	-0.193215	0.254772		0.00344533	-0.0395088	0.0579767		0.0565149	-0.0179416	0.304687		-0.0147901	-1.80257	1.77105
LDL	0.0181088	-0.300635	0.358327		-0.00374723	-0.0610861	0.025074		-0.0340847	-0.158496	0.0216566		-0.0223789	-1.08317	2.07986
Glucose	0.0163196	-0.558111	0.368873		0.0287522	-0.0168863	0.14644		0.041055	0.00310384	0.183924		0.0307091	-1.37185	1.04648
C-reactive protein	0.0444356	-1.27769	1.2997		0.0612398	-0.0828988	0.276047		0.0402227	-0.000456278	0.16723		0.0128261	-1.47469	1.35912
