# Supplementary material
Source: publisher site journal article supplement (doi:10.18632/aging.206377)
Supplement: Supplementary file 11 [file aging-v18i1-206377-supplementary-material-SD8.pdf]

**Supplementary Table 11. Average mediated proportions for DNA methylation and clinical mediators on the relationship between race and ethnicity and cancer-specific mortality, NHANES 1999-2002 (n=2,402). Bold indicates statistical significance (p-value<0.05), and bold with two asterisks indicates significance passed Bonferroni adjustment (p-value<0.0021).**

|                                                 | <b>Model 1. Black (N= 516)<br/>vs. White (N= 943)</b> |                  | <b>Model 2. Hispanic (N=860)<br/>vs. White (N= 943)</b> |                  | <b>Model 3. Other races (N=83)<br/>vs. White (N= 943)</b> |                  |
|-------------------------------------------------|-------------------------------------------------------|------------------|---------------------------------------------------------|------------------|-----------------------------------------------------------|------------------|
|                                                 | <b>Average mediated<br/>proportion</b>                | <b>(95% CI)</b>  | <b>Average mediated<br/>proportion</b>                  | <b>(95% CI)</b>  | <b>Average mediated<br/>proportion</b>                    | <b>(95% CI)</b>  |
| <b>Chronological age clocks</b>                 |                                                       |                  |                                                         |                  |                                                           |                  |
| Hannum                                          | -30.2%                                                | (-300.1% 141.6%) | 3.8%                                                    | (-127.4% 179.2%) | 0.3%                                                      | (-111.4% 149.8%) |
| Hovarth                                         | -10.9%                                                | (-165.3% 56.1%)  | -2.0%                                                   | (-159.6% 170.6%) | 0.0%                                                      | (-64.9% 64.9%)   |
| Weidner                                         | -2.8%                                                 | (-31.6% 15.9%)   | -0.8%                                                   | (-106.8% 78.3%)  | -1.1%                                                     | (-91.5% 88.0%)   |
| Lin                                             | -3.6%                                                 | (-37.0% 40.7%)   | -0.7%                                                   | (-80.3% 66.1%)   | -0.5%                                                     | (-68.1% 68.3%)   |
| Vidal-Bralo                                     | -28.6%                                                | (-261.0% 197.8%) | -11.2%                                                  | (-395.7% 316.8%) | -4.9%                                                     | (-324.3% 269.6%) |
| SkinBlood                                       | -5.2%                                                 | (-53.5% 47.5%)   | 0.0%                                                    | (-17.9% 17.5%)   | 0.2%                                                      | (-37.5% 38.5%)   |
| Zhang                                           | -7.1%                                                 | (-70.1% 17.6%)   | -0.1%                                                   | (-17.1% 20.4%)   | -0.1%                                                     | (-32.7% 34.1%)   |
| <b>Physiological functioning clocks</b>         |                                                       |                  |                                                         |                  |                                                           |                  |
| PhenoAge                                        | -8.4%                                                 | (-76.0% 84.3%)   | 1.5%                                                    | (-189.7% 128.3%) | 0.6%                                                      | (-158.6% 118.8%) |
| GrimAge                                         | 40.1%                                                 | (-256.6% 455.9%) | 4.4%                                                    | (-272.9% 360.0%) | 2.4%                                                      | (-352.1% 187.8%) |
| GrimAge2                                        | 53.6%                                                 | (-307.1% 765.2%) | 23.4%                                                   | (-593.5% 795.9%) | 7.0%                                                      | (-178.9% 261.1%) |
| <b>Pace of aging clock</b>                      |                                                       |                  |                                                         |                  |                                                           |                  |
| DunedinPoAm                                     | 21.5%                                                 | (-258.2% 261.4%) | 17.9%                                                   | (-465.7% 619.5%) | 9.8%                                                      | (-286.4% 322.0%) |
| <b>Clocks trained on other aging biomarkers</b> |                                                       |                  |                                                         |                  |                                                           |                  |
| Yang                                            | 2.1%                                                  | (-126.5% 107.1%) | -4.7%                                                   | (-206.1% 138.8%) | -3.3%                                                     | (-105.5% 174.4%) |
| Telomere                                        | -54.2%                                                | (-665.0% 414.6%) | 2.0%                                                    | (-144.2% 203.1%) | -2.4%                                                     | (-189.6% 220.8%) |
| <b>Behavioral/Lifestyle measures</b>            |                                                       |                  |                                                         |                  |                                                           |                  |
| Sedentary behavior                              | 9.2%                                                  | (-116.7% 173.0%) | 3.7%                                                    | (-225.0% 218.1%) | 1.7%                                                      | (-98.0% 143.0%)  |
| Healthy eating index                            | 25.8%                                                 | (-130.7% 268.6%) | 7.0%                                                    | (-271.6% 278.2%) | 0.0%                                                      | (-140.0% 124.9%) |
| Smoking pack years                              | -19.5%                                                | (-150.5% 77.0%)  | -8.9%                                                   | (-275.0% 269.8%) | -2.3%                                                     | (-179.2% 128.6%) |
| Alcohol drinker                                 | -5.6%                                                 | (-118.9% 67.5%)  | -0.9%                                                   | (-147.8% 168.6%) | 1.8%                                                      | (-216.9% 219.7%) |
| <b>Anthropometric measures</b>                  |                                                       |                  |                                                         |                  |                                                           |                  |
| Waist to thigh ratio                            | -18.5%                                                | (-181.3% 80.9%)  | 1.1%                                                    | (-252.0% 137.5%) | 0.7%                                                      | (-101.5% 116.1%) |
| BMI                                             | 0.4%                                                  | (-29.9% 44.9%)   | -0.2%                                                   | (-54.7% 47.3%)   | 0.0%                                                      | (-21.3% 27.4%)   |
| <b>Clinical used blood Biomarkers</b>           |                                                       |                  |                                                         |                  |                                                           |                  |
| Total cholesterol                               | -3.1%                                                 | (-57.4% 23.2%)   | -0.1%                                                   | (-38.9% 36.1%)   | -0.1%                                                     | (-57.5% 64.6%)   |
| HDL                                             | 0.8%                                                  | (-15.6% 27.0%)   | 2.8%                                                    | (-153.4% 138.9%) | -0.5%                                                     | (-49.4% 36.6%)   |
| LDL                                             | -1.3%                                                 | (-30.5% 21.8%)   | 0.2%                                                    | (-55.5% 55.5%)   | 0.0%                                                      | (-71.2% 63.7%)   |
| Glucose                                         | -10.8%                                                | (-184.9% 120.3%) | 0.0%                                                    | (-106.7% 173.2%) | 1.1%                                                      | (-89.4% 101.3%)  |
| C-reactive protein                              | 7.1%                                                  | (-61.0% 73.4%)   | 0.2%                                                    | (-37.1% 30.0%)   | 0.2%                                                      | (-34.6% 27.8%)   |

**Supplementary Table 12. Average mediated proportions for DNA methylation and clinical mediators on the relationship between education attainment and cancer-specific mortality, NHANES 1999-2002 (n=2,402). Bold indicates statistical significance (p-value<0.05), and bold with two asterisks indicates significance passed Bonferroni adjustment (p-value<0.0021).**

|                                                 | Model 1. Less than high school (N=1,096)<br>vs. College degree or higher (N= 370) |                     | Model 2. High school graduate/GED (N=496)<br>vs. College degree or higher (N= 370) |                     | Model 3. Some college or associates degree (N=440)<br>vs. College degree or higher (N= 370) |                     |
|-------------------------------------------------|-----------------------------------------------------------------------------------|---------------------|------------------------------------------------------------------------------------|---------------------|---------------------------------------------------------------------------------------------|---------------------|
|                                                 | Average mediated proportion                                                       | (95% CI)            | Average mediated proportion                                                        | (95% CI)            | Average mediated proportion                                                                 | (95% CI)            |
| <b>Chronological age clocks</b>                 |                                                                                   |                     |                                                                                    |                     |                                                                                             |                     |
| Hannum                                          | 1.0%                                                                              | (-1.3% 5.6%)        | 3.8%                                                                               | (-0.1% 14.5%)       | 0.5%                                                                                        | (-5.2% 5.5%)        |
| Hovarth                                         | -0.1%                                                                             | (-3.4% 1.9%)        | -1.9%                                                                              | (-8.9% 1.0%)        | -3.4%                                                                                       | (-12.1% 0.1%)       |
| Weidner                                         | 0.9%                                                                              | (-1.9% 6.9%)        | 0.0%                                                                               | (-2.5% 2.9%)        | -1.3%                                                                                       | (-7.8% 1.6%)        |
| Lin                                             | 0.1%                                                                              | (-1.5% 2.4%)        | -1.2%                                                                              | (-6.2% 1.3%)        | -1.2%                                                                                       | (-5.7% 0.9%)        |
| Vidal-Bralo                                     | -0.5%                                                                             | (-4.4% 1.5%)        | -0.3%                                                                              | (-5.5% 2.5%)        | -0.5%                                                                                       | (-6.6% 2.9%)        |
| SkinBlood                                       | -0.7%                                                                             | (-4.2% 0.4%)        | 0.2%                                                                               | (-5.5% 4.3%)        | -0.1%                                                                                       | (-2.3% 2.2%)        |
| Zhang                                           | 0.0%                                                                              | (-1.3% 0.8%)        | 0.0%                                                                               | (-2.0% 2.1%)        | 0.0%                                                                                        | (-3.4% 2.9%)        |
| <b>Physiological functioning clocks</b>         |                                                                                   |                     |                                                                                    |                     |                                                                                             |                     |
| PhenoAge                                        | 2.2%                                                                              | (-2.5% 12.1%)       | 2.5%                                                                               | (-1.7% 13.2%)       | 1.2%                                                                                        | (-2.9% 8.4%)        |
| GrimAge                                         | <b>20.3%</b>                                                                      | <b>(5.4% 56.1%)</b> | <b>9.0%**</b>                                                                      | <b>(2.7% 30.1%)</b> | <b>13.3%</b>                                                                                | <b>(2.8% 36.0%)</b> |
| GrimAge2                                        | <b>20.0%</b>                                                                      | <b>(3.5% 48.9%)</b> | <b>10.2%</b>                                                                       | <b>(3.8% 30.4%)</b> | 12.1%                                                                                       | (-0.9% 34.4%)       |
| <b>Pace of aging clock</b>                      |                                                                                   |                     |                                                                                    |                     |                                                                                             |                     |
| DunedinPoAm                                     | 9.7%                                                                              | (-1.5% 37.6%)       | <b>6.6%</b>                                                                        | <b>(0.7% 25.6%)</b> | 6.5%                                                                                        | (-3.4% 20.9%)       |
| <b>Clocks trained on other aging biomarkers</b> |                                                                                   |                     |                                                                                    |                     |                                                                                             |                     |
| Yang                                            | -1.7%                                                                             | (-18.8% 5.5%)       | 0.4%                                                                               | (-5.0% 4.7%)        | 0.1%                                                                                        | (-5.1% 7.3%)        |
| Telomere                                        | 2.8%                                                                              | (-2.3% 12.7%)       | 2.9%                                                                               | (-3.7% 11.5%)       | 1.3%                                                                                        | (-1.6% 6.6%)        |
| <b>Behavioral/Lifestyle measures</b>            |                                                                                   |                     |                                                                                    |                     |                                                                                             |                     |
| Sedentary behavior                              | 2.0%                                                                              | (-12.6% 27.5%)      | 11.4%                                                                              | (-1.4% 38.2%)       | -0.8%                                                                                       | (-13.2% 8.0%)       |
| Healthy eating index                            | -0.8%                                                                             | (-18.3% 45.1%)      | <b>18.8%</b>                                                                       | <b>(3.6% 55.4%)</b> | <b>11.0%</b>                                                                                | <b>(2.0% 26.0%)</b> |
| Smoking pack years                              | 6.3%                                                                              | (-0.6% 27.3%)       | <b>7.8%</b>                                                                        | <b>(2.1% 29.6%)</b> | <b>9.9%**</b>                                                                               | <b>(4.0% 25.5%)</b> |
| Alcohol drinker                                 | -6.5%                                                                             | (-32.9% 1.3%)       | -5.4%                                                                              | (-35.1% 1.8%)       | -0.5%                                                                                       | (-10.3% 4.6%)       |
| <b>Anthropometric measures</b>                  |                                                                                   |                     |                                                                                    |                     |                                                                                             |                     |
| Waist to thigh ratio                            | -1.5%                                                                             | (-22.3% 8.2%)       | 1.8%                                                                               | (-2.9% 10.0%)       | 0.3%                                                                                        | (-3.4% 5.5%)        |
| BMI                                             | -8.8%                                                                             | (-46.6% 2.0%)       | -0.5%                                                                              | (-6.3% 5.7%)        | 3.6%                                                                                        | (-4.0% 11.6%)       |
| <b>Clinical used blood Biomarkers</b>           |                                                                                   |                     |                                                                                    |                     |                                                                                             |                     |
| Total cholesterol                               | 0.0%                                                                              | (-5.9% 3.9%)        | <b>7.2%</b>                                                                        | <b>(1.2% 27.1%)</b> | -5.6%                                                                                       | (-24.9% 0.9%)       |
| HDL                                             | -4.2%                                                                             | (-22.0% 1.7%)       | -1.2%                                                                              | (-13.0% 1.5%)       | 0.7%                                                                                        | (-4.2% 9.2%)        |
| LDL                                             | 0.0%                                                                              | (-6.4% 5.1%)        | <b>8.4%</b>                                                                        | <b>(1.4% 27.5%)</b> | -3.9%                                                                                       | (-16.3% 2.1%)       |
| Glucose                                         | -3.3%                                                                             | (-20.7% 4.4%)       | -1.7%                                                                              | (-10.8% 2.2%)       | -0.2%                                                                                       | (-4.7% 2.0%)        |
| C-reactive protein                              | 0.5%                                                                              | (-1.4% 3.7%)        | 0.1%                                                                               | (-1.5% 1.6%)        | 0.1%                                                                                        | (-1.7% 2.9%)        |

**Supplementary Table 13. Average mediated proportions for DNA methylation and clinical mediators on the relationship between household income and cancer-specific mortality, NHANES 1999-2002 (n=2,402). Bold indicates statistical significance (p-value<0.05), and bold with two asterisks indicates significance passed Bonferroni adjustment (p-value<0.0021).**

|                                                 | Model 1. PIR<1 (N=373)<br>vs. PIR 5+ (N= 399) |                       | Model 2. PIR 1-2 (N=707)<br>vs. PIR 5+ (N= 399) |                  | Model 3. PIR 2-5 (N=923)<br>vs. PIR 5+ (N= 399) |                  |
|-------------------------------------------------|-----------------------------------------------|-----------------------|-------------------------------------------------|------------------|-------------------------------------------------|------------------|
|                                                 | Average mediated<br>proportion                | (95% CI)              | Average<br>mediated<br>proportion               | (95% CI)         | Average<br>mediated<br>proportion               | (95% CI)         |
| <b>Chronological age clocks</b>                 |                                               |                       |                                                 |                  |                                                 |                  |
| Hannum                                          | 4.6%                                          | (-22.2% 47.4%)        | 1.7%                                            | (-6.5% 16.9%)    | 0.4%                                            | (-53.5% 84.1%)   |
| Hovarth                                         | -0.1%                                         | (-23.6% 27.5%)        | 0.0%                                            | (-7.4% 5.6%)     | -1.3%                                           | (-45.4% 41.3%)   |
| Weidner                                         | -0.3%                                         | (-30.3% 20.4%)        | 0.7%                                            | (-11.4% 17.5%)   | 0.0%                                            | (-15.2% 9.4%)    |
| Lin                                             | 2.9%                                          | (-12.8% 37.2%)        | -0.4%                                           | (-12.9% 7.7%)    | -1.2%                                           | (-32.1% 20.3%)   |
| Vidal-Bralo                                     | -2.6%                                         | (-91.4% 42.0%)        | 0.2%                                            | (-8.5% 13.0%)    | -0.8%                                           | (-50.5% 35.1%)   |
| SkinBlood                                       | 0.7%                                          | (-13.4% 24.9%)        | 0.0%                                            | (-4.7% 4.9%)     | -2.8%                                           | (-33.1% 36.6%)   |
| Zhang                                           | 0.1%                                          | (-22.1% 16.1%)        | 0.5%                                            | (-3.5% 9.4%)     | -1.1%                                           | (-30.6% 19.3%)   |
| <b>Physiological functioning clocks</b>         |                                               |                       |                                                 |                  |                                                 |                  |
| PhenoAge                                        | 5.0%                                          | (-49.0% 74.1%)        | 7.5%                                            | (-9.2% 56.9%)    | 8.0%                                            | (-100.5% 148.4%) |
| GrimAge                                         | <b>75.8%</b>                                  | <b>(30.3% 325.9%)</b> | 29.2%                                           | (-3.0% 161.3%)   | 35.3%                                           | (-479.9% 617.9%) |
| GrimAge2                                        | <b>79.7%</b>                                  | <b>(28.4% 415.5%)</b> | 35.4%                                           | (-3.4% 195.6%)   | 38.0%                                           | (-388.4% 648.5%) |
| <b>Pace of aging clock</b>                      |                                               |                       |                                                 |                  |                                                 |                  |
| DunedinPoAm                                     | <b>53.9%</b>                                  | <b>(11.8% 240.9%)</b> | 13.0%                                           | (-13.4% 106.8%)  | 19.4%                                           | (-286.6% 352.8%) |
| <b>Clocks trained on other aging biomarkers</b> |                                               |                       |                                                 |                  |                                                 |                  |
| Yang                                            | -0.8%                                         | (-38.8% 36.9%)        | 0.1%                                            | (-15.6% 24.2%)   | -0.2%                                           | (-24.0% 28.9%)   |
| Telomere                                        | 12.5%                                         | (-40.6% 116.3%)       | 8.5%                                            | (-3.8% 54.0%)    | 3.6%                                            | (-43.5% 53.3%)   |
| <b>Behavioral/Lifestyle measures</b>            |                                               |                       |                                                 |                  |                                                 |                  |
| Sedentary behavior                              | 41.3%                                         | (-265.1% 342.8%)      | -0.8%                                           | (-65.8% 107.4%)  | 5.7%                                            | (-256.2% 194.7%) |
| Healthy eating index                            | 67.6%                                         | (-528.8% 618.2%)      | 21.1%                                           | (-131.8% 252.1%) | 19.3%                                           | (-444.2% 516.9%) |
| Smoking pack years                              | <b>31.9%</b>                                  | <b>(11.7% 127.7%)</b> | 23.4%                                           | (-114.1% 171.3%) | 18.5%                                           | (-305.0% 354.0%) |
| Alcohol drinker                                 | -50.3%                                        | (-316.9% 56.6%)       | -18.1%                                          | (-178.6% 68.2%)  | -4.4%                                           | (-156.4% 165.7%) |
| <b>Anthropometric measures</b>                  |                                               |                       |                                                 |                  |                                                 |                  |
| Waist to thigh ratio                            | -8.0%                                         | (-151.2% 74.2%)       | 6.3%                                            | (-27.1% 79.5%)   | 7.0%                                            | (-118.1% 201.9%) |
| BMI                                             | -3.1%                                         | (-116.3% 71.6%)       | -10.3%                                          | (-87.9% 38.2%)   | 6.0%                                            | (-134.5% 210.4%) |
| <b>Clinical used blood Biomarkers</b>           |                                               |                       |                                                 |                  |                                                 |                  |
| Total cholesterol                               | -2.2%                                         | (-40.1% 11.2%)        | -0.5%                                           | (-21.4% 10.0%)   | 7.0%                                            | (-113.5% 139.8%) |
| HDL                                             | 20.0%                                         | (-61.7% 172.3%)       | 12.8%                                           | (-28.2% 106.7%)  | -4.2%                                           | (-116.4% 89.8%)  |
| LDL                                             | -2.8%                                         | (-56.1% 31.5%)        | -0.1%                                           | (-24.1% 15.9%)   | 12.8%                                           | (-233.9% 270.1%) |
| Glucose                                         | -10.6%                                        | (-168.7% 122.5%)      | 0.2%                                            | (-19.2% 30.6%)   | -5.6%                                           | (-147.4% 111.6%) |
| C-reactive protein                              | 5.2%                                          | (-12.7% 42.7%)        | 3.0%                                            | (-21.3% 43.1%)   | 2.4%                                            | (-74.5% 46.3%)   |
