# Supplementary material
Source: publisher site journal article supplement (doi:10.18632/aging.206377)
Supplement: Supplementary file 12 [file aging-v18i1-206377-supplementary-material-SD7.xlsx]

## Sheet: Supplementary Table 10
Supplementary Table 10. Average mediated proportions for DNA methylation and clinical mediators on the relationship between occupation status and cardiovascular-specific mortality, NHANES 1999-2002 (n=2,402). Bold indicates statistical significance (p-value<0.05), and bold with two asterisks indicates significance passed Bonferroni adjustment (p-value<0.0021).
	Model 1. Semi-routine white collar (N=411) vs. White collar (N= 535)				Model 2. High skill blue collar (N=389) vs. White collar (N= 535)				Model 3. Semi-routine blue collar (N=1,004) vs. White collar (N= 535)				Model 4. Never worked (N=63) vs. White collar (N= 535)
	Average mediated proportion	(95% CI)			Average mediated proportion	(95% CI)			Average mediated proportion	(95% CI)			Average mediated proportion	(95% CI)
Chronological age clocks
Hannum	0.00077917	-0.136985	0.162891		0.080086	-3.43368	3.33658		0.00569979	-0.400625	0.273524		-0.0711851	-1.92087	1.41132
Hovarth	-0.000113778	-0.175779	0.140134		0.000790541	-0.1596	0.179983		-0.00396641	-0.171208	0.190672		0.00200738	-0.312663	0.327298
Weidner	0.000841233	-0.183502	0.161717		-0.000663555	-0.540273	0.831299		-8.20083e-05	-0.212615	0.196967		9.8509e-05	-0.323076	0.443595
Lin	-0.000974386	-0.170902	0.146171		-0.00375774	-0.772369	0.703247		-4.78863e-06	-0.144129	0.181387		-0.00177322	-0.471325	0.497431
Vidal-Bralo	0.00785992	-0.36692	0.471896		-0.000358843	-0.418543	0.409607		-0.00824921	-0.395405	0.338499		0.000575623	-0.33383	0.431502
SkinBlood	0.00162115	-0.176285	0.169783		0.00952895	-2.23776	3.21606		0.00877549	-0.298687	0.445453		-0.0188709	-0.816534	0.71583
Zhang	0.000157414	-0.162263	0.11318		-0.000426813	-1.3541	1.29462		-0.00613611	-0.324562	0.459916		-0.0404286	-1.10513	0.760331
Physiological functioning clocks
PhenoAge	0.00495974	-0.272384	0.314734		0.00875367	-1.85635	2.48538		0.00279279	-0.271914	0.365202		0.0160173	-1.14981	0.868976
GrimAge	-0.216508	-3.26196	3.25936		0.410033	-10.3159	12.5933		0.327137	-6.0648	5.6818		-0.195827	-5.49147	3.23727
GrimAge2	-0.250193	-4.2181	5.93781		0.386962	-13.0957	10.0955		0.358481	-4.75212	5.34263		-0.158354	-2.81473	2.17493
Pace of aging clock
DunedinPoAm	-0.128225	-3.28923	3.33526		0.0631134	-3.65306	4.20615		0.137691	-2.14692	1.71853		-0.0108668	-0.897009	0.946093
Clocks trained on other aging biomarkers
Yang	-0.00075144	-0.318901	0.38709		0.0112881	-2.48677	3.20454		0.0148754	-0.614784	0.731202		0.00266006	-0.36766	0.360544
Telomere	0.0019734	-0.274979	0.254684		0.0194266	-1.15365	1.41527		0.014462	-0.308658	0.390564		-0.016101	-0.88457	0.917563
Behavioral/Lifestyle measures
Sedentary behavior	-0.0919295	-2.23569	2.32401		0.183697	-12.3692	12.3842		0.443203	-7.95852	9.5568		-0.0719676	-1.80736	2.05868
Healthy eating index	0.0235731	-0.396576	0.798802		0.020668	-3.80079	2.81263		-0.12287	-2.79032	2.95911		0.0690474	-1.14374	1.51405
Smoking pack years	-0.0963463	-1.19922	0.976164		0.180986	-5.69925	5.14379		0.145852	-2.1454	2.93192		-0.085641	-1.68947	2.11611
Alcohol drinker	-0.0213259	-0.646533	0.30353		-0.0744329	-5.7084	6.65647		0.176157	-3.75998	3.95674		-0.0533143	-1.13797	1.19434
Anthropometric measures
Waist to thigh ratio	-0.0259089	-1.42556	0.934079		-0.0312777	-2.14954	1.8253		0.0924799	-2.40332	2.18756		-0.0579862	-0.911842	1.06112
BMI	-0.00397182	-0.689092	0.667424		-0.0755269	-2.35089	1.5687		0.04659	-1.48595	2.41296		0.0351088	-1.30971	1.08628
Clinical used blood Biomarkers
Total cholesterol	-0.0148273	-1.14237	1.1563		-0.00510727	-0.617374	0.575242		-0.0118611	-0.610792	0.725219		-0.0725189	-2.00222	1.77044
HDL	0.000196777	-0.328004	0.35098		-0.0283272	-2.02519	1.27074		-0.0251337	-1.53242	1.02398		0.0105412	-0.951151	1.1115
LDL	-0.00724608	-0.796528	0.579014		-0.00121791	-0.542254	0.612804		-0.0170019	-1.04364	1.21562		-0.0570613	-2.0772	1.54451
Glucose	-0.00206459	-0.191237	0.104198		0.00602883	-1.12067	1.01584		0.0767469	-1.1339	1.59469		-0.0263896	-0.886826	0.45637
C-reactive protein	0.000592907	-0.30861	0.211903		3.673e-05	-0.61425	0.390846		0.000439314	-0.324084	0.303024		-0.000132162	-0.309143	0.240455
