# Supplementary material
Source: publisher site journal article supplement (doi:10.18632/aging.206377)
Supplement: Supplementary file 13 [file aging-v18i1-206377-supplementary-material-SD9.xlsx]

## Sheet: Supplementary Table 14
Supplementary Table 14. Average mediated proportions for DNA methylation and clinical mediators on the relationship between occupation status and cancer-specific mortality, NHANES 1999-2002 (n=2,402). Bold indicates statistical significance (p-value<0.05), and bold with two asterisks indicates significance passed Bonferroni adjustment (p-value<0.0021).
	Model 1. Semi-routine white collar (N=411) vs. White collar (N= 535)				Model 2. High skill blue collar (N=389) vs. White collar (N= 535)				Model 3. Semi-routine blue collar (N=1,004) vs. White collar (N= 535)				Model 4. Never worked (N=63) vs. White collar (N= 535)
	Average mediated proportion	(95% CI)			Average mediated proportion	(95% CI)			Average mediated proportion	(95% CI)			Average mediated proportion	(95% CI)
Chronological age clocks
Hannum	0.00339761	-0.428956	0.485061		0.0396352	-0.0206745	0.143132		0.0109414	-0.0240643	0.0745505		0.198043	-3.17521	2.8433
Hovarth	0.00108576	-0.293477	0.307893		0.000265714	-0.0312055	0.0318758		-0.00943609	-0.0677374	0.0188084		0.0709429	-1.37037	1.41118
Weidner	-0.00295011	-0.20981	0.148033		7.77598e-06	-0.0319271	0.0281431		8.87117e-05	-0.0314017	0.0333731		0.0116058	-0.378091	0.512661
Lin	0.00040228	-0.248315	0.198193		0.000433438	-0.0300605	0.0360501		0.000120493	-0.040097	0.0311299		0.00238479	-0.333201	0.459375
Vidal-Bralo	-0.0616054	-0.702808	0.707018		-0.000408758	-0.0305466	0.0201429		-0.0417866	-0.160724	0.000721886		0.0470746	-1.29085	0.952179
SkinBlood	-0.0137604	-0.598872	0.263357		-0.00441955	-0.0506	0.0304031		-0.000202683	-0.0289857	0.0332085		0.0206189	-0.635094	0.980503
Zhang	-0.00114571	-0.264423	0.198942		-3.56505e-05	-0.0240476	0.0255967		-0.000137302	-0.0308244	0.0241536		0.0287368	-0.971549	1.50906
Physiological functioning clocks
PhenoAge	0.0392567	-0.418881	0.751026		0.0449895	-0.0449943	0.211918		0.0265388	-0.00409891	0.135686		0.150203	-2.69973	3.79829
GrimAge	0.339353	-2.64976	3.32583		0.29947	0.120073	0.660204		0.204382	0.0674032	0.77005		0.383987	-5.1954	6.6177
GrimAge2	0.322806	-1.98556	3.67765		0.297283	0.10995	0.68211		0.231677	0.0792878	0.809349		0.313678	-3.7906	6.3126
Pace of aging clock
DunedinPoAm	0.282899	-2.11043	2.90943		0.178142	0.0445196	0.485954		0.153648	0.0348657	0.681334		0.213694	-5.50961	5.56589
Clocks trained on other aging biomarkers
Yang	0.0013272	-0.235301	0.337207		-0.00114199	-0.110021	0.0820731		-0.0491764	-0.413385	0.0149453		0.00239278	-0.754877	0.946647
Telomere	-0.0073593	-0.317991	0.270267		0.0346093	-0.017007	0.100389		0.00993694	-0.029921	0.0810758		0.0541261	-0.924819	1.14511
Behavioral/Lifestyle measures
Sedentary behavior	0.00757071	-0.352532	0.399629		0.0116481	-0.245946	0.183374		0.115117	-0.146376	0.63043		0.00432332	-0.959303	0.972303
Healthy eating index	0.108051	-1.21421	1.43343		0.324347	0.127222	0.741501		0.263764	-0.0152665	1.35455		0.419184	-6.67192	10.9594
Smoking pack years	0.138558	-1.90113	1.35386		0.214807	0.0905119	0.531715		0.116572	0.0210275	0.577513		0.131428	-1.9726	2.92285
Alcohol drinker	-0.00621508	-0.334216	0.229989		-0.143651	-0.399292	-0.016307		0.00776825	-0.204606	0.159523		-0.0366978	-1.53458	1.4483
Anthropometric measures
Waist to thigh ratio	-0.000682012	-0.206216	0.125539		0.0163067	-0.125526	0.112081		-0.00433275	-0.344888	0.17986		-0.0822301	-1.5553	1.87512
BMI	0.0206235	-0.197419	0.386387		-0.00543182	-0.0815945	0.0805872		-0.00110071	-0.191743	0.245554		-0.00980116	-1.31838	1.15601
Clinical used blood Biomarkers
Total cholesterol	0.0543257	-0.192417	0.69136		0.00242785	-0.028573	0.0533261		-0.0326457	-0.233502	0.0329035		-0.125663	-3.99417	2.16968
HDL	0.00142575	-0.422973	0.254327		-0.014928	-0.125874	0.0306953		-0.0182384	-0.150894	0.159995		-0.0282747	-1.46809	1.15909
LDL	0.0609852	-0.287872	0.672462		0.000873905	-0.0308599	0.0489162		-0.0544782	-0.364471	0.0296621		-0.110236	-2.49052	4.51422
Glucose	-0.0085361	-0.343885	0.229064		-0.0560646	-0.266881	0.0231671		-0.00255149	-0.0875453	0.0754576		-0.198444	-6.37408	2.61923
C-reactive protein	0.0120511	-0.245823	0.371662		0.0230874	0.000513647	0.0757051		0.00860851	-0.0227238	0.131636		0.00582067	-0.763421	1.14077
